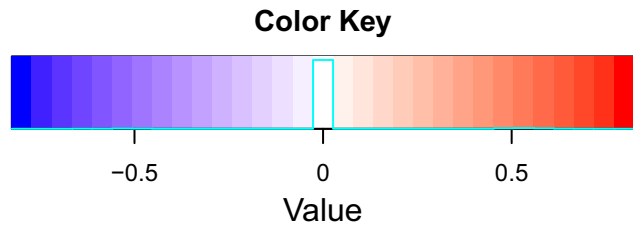

**q-val < 0.05 abs(Cor) > 0**

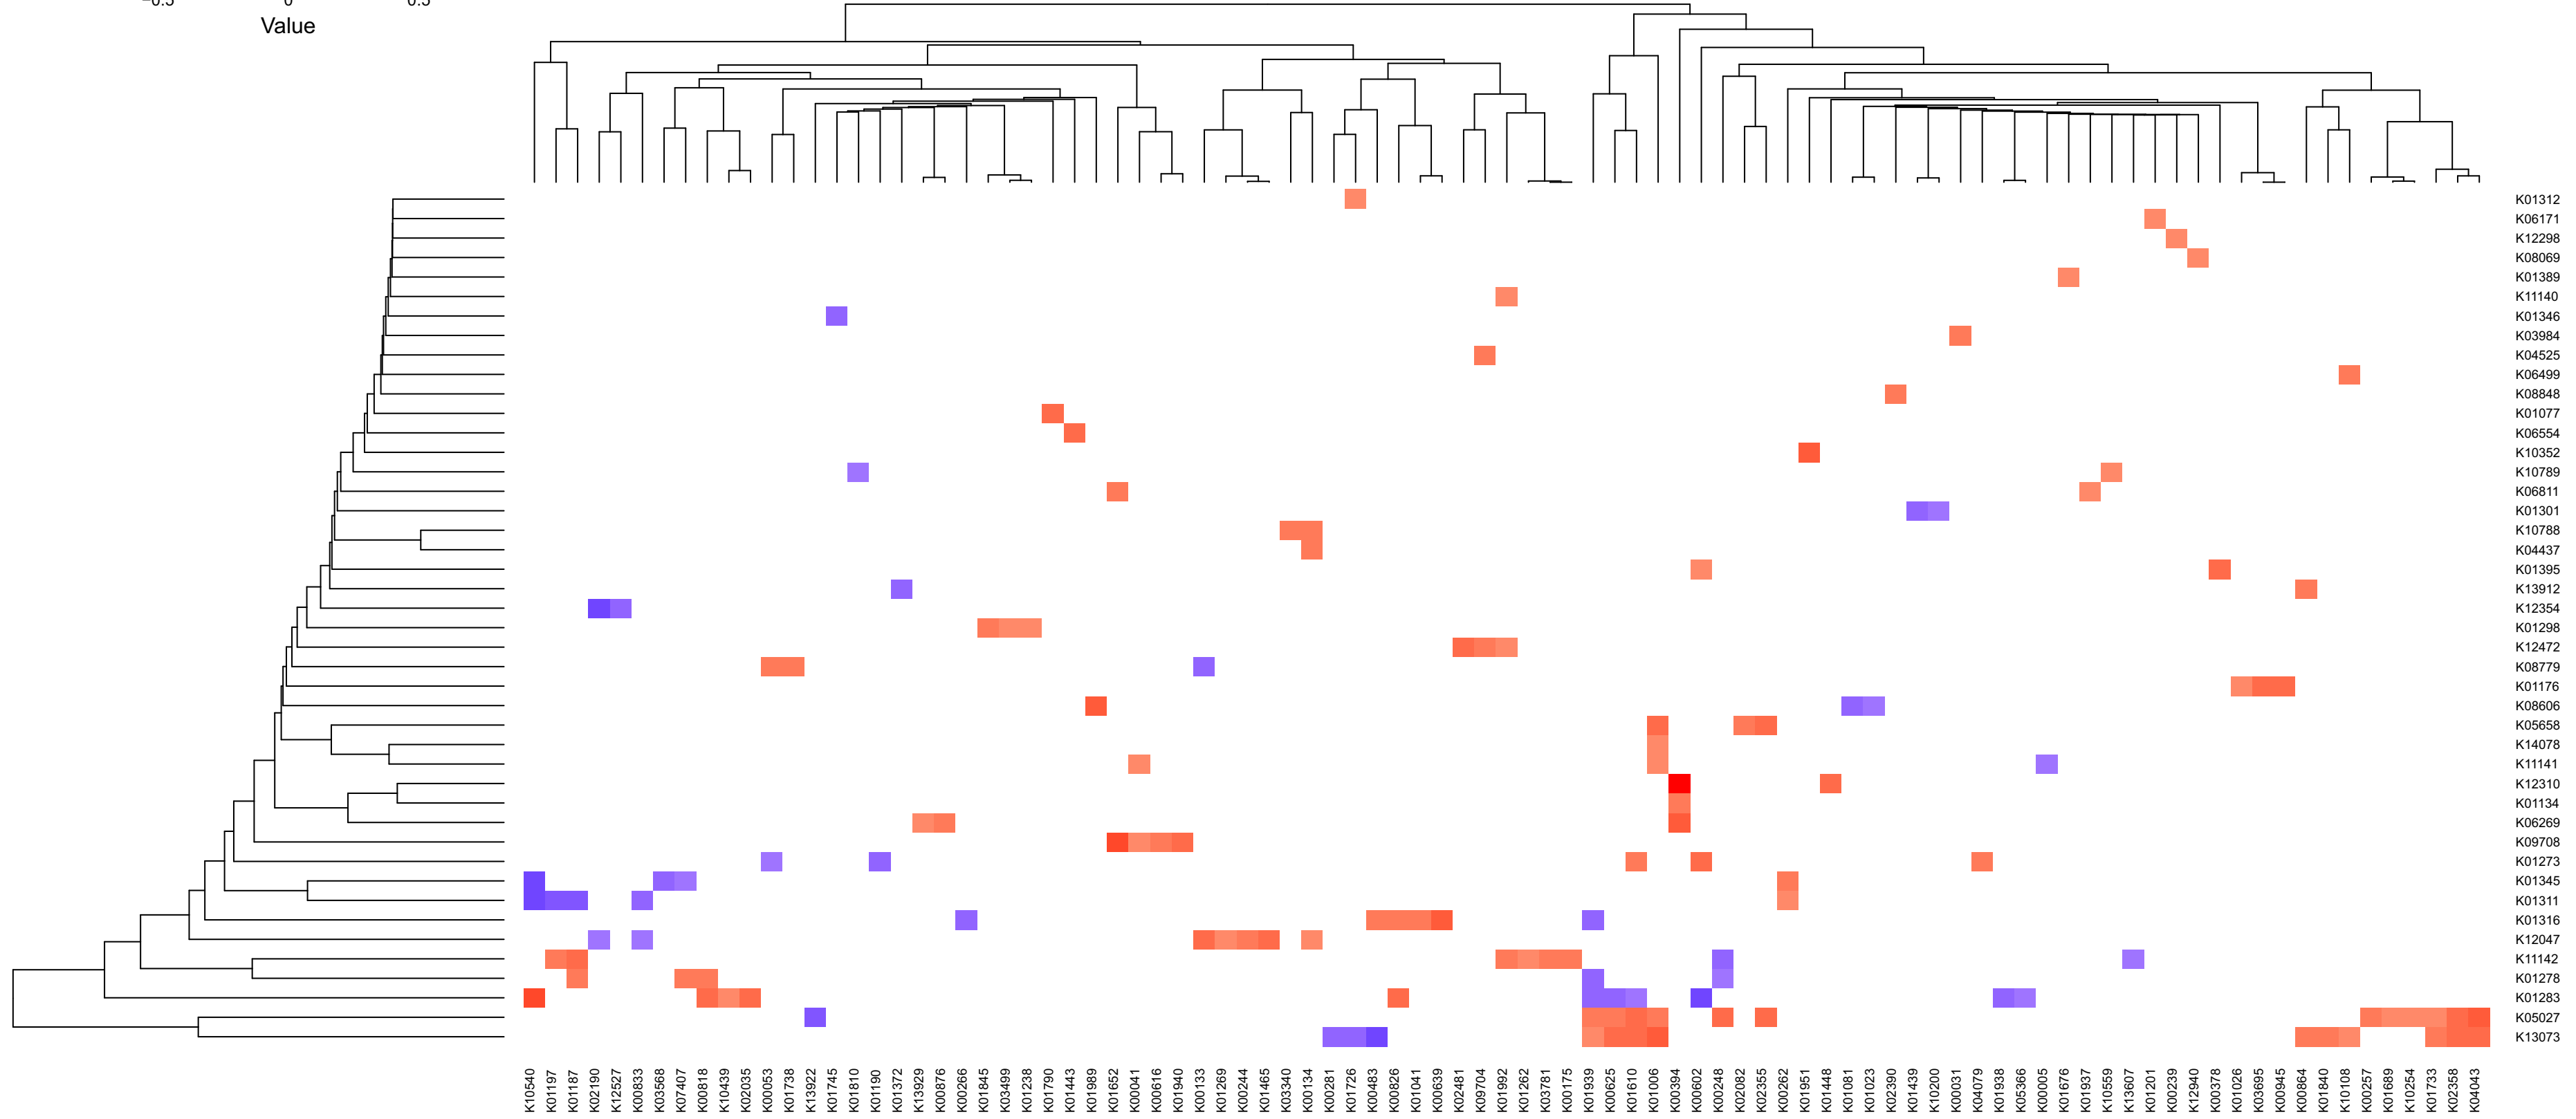

Source: https://storage.googleapis.com/plos-corpus-prod/10.1371/journal.pone.0153294/1/pone.0153294.s002.pdf?X-Goog-Algorithm=GOOG4-RSA-SHA256&X-Goog-Credential=wombat-sa%40plos-prod.iam.gserviceaccount.com%2F20210417%2Fauto%2Fstorage%2Fgoog4_request&X-Goog-Date=20210417T062252Z&X-Goog-Expires=3600&X-Goog-SignedHeaders=host&X-Goog-Signature=54651da654c1f0430f99345897c2696d661700da48e3b3167e58d72da37b549bb466ab728aea701146e697e6b4f7d910201fdba7a44bf37081c97889979579c49f06ccb09946d4648b3edbce5c93b0029121b841ca9333a447dc05314b0529ef5e2b14a750cf75766287f0c8158c76e713a782195cc22fa95b445f02ea2b69e48833b6dc6dbea2ba2d5d1afc9e7a9436da9d5485cc6dc6ec5f5fd8b6a422b8186b461139ff132ed9379252418ec4394ca060997cd4270ba79bfcee35db72d8ddd4f8654bec094d75bc237956d621b0cb1d5940276c5a059b62860ad4f984818ab75c765db6b4e0299c48ff018bb103a51da6d401c129390c0d6fc1e1a54f5360
