# Supplementary material for: Faecal Metaproteomic Analysis Reveals a Personalized and Stable Functional Microbiome and Limited Effects of a Probiotic Intervention in Adults
Source: PLoS One. 2016 Apr 12;11(4):e0153294. doi: 10.1371/journal.pone.0153294 (PMC4829149; doi:10.1371/journal.pone.0153294)
Supplement: S4 Table — (XLSX) [file pone.0153294.s008.xlsx]

## Sheet: L2-frpa
	104-1	104-2	104-3	106-1	106-2	106-3	107-1	107-2	107-3	112-1	112-2	112-3	116-1	116-2	116-3	119-1	119-2	119-3	122-1	122-2	122-3	124-1	124-2	124-3	127-2	127-3	130-1	130-2	130-3	135-1	135-2	135-3	137-1	137-2	137-3	155-1	155-2	155-3	162-1	162-2	162-3	163-1	163-2	163-3
Actinomycetaceae	148.58	108.082	163.627	131.95	164.559	117.016	86.3155	100.728	135.907	99.4029	183.181	260.148	126.162	166.227	179.255	105.742	98.9382	136.625	278.075	510.135	383.125	102.84	115.474	173.631	145.926	170.905	110.667	156.336	131.955	123.179	88.5704	190.191	102.544	100.302	90.5745	92.8397	76.0304	89.9768	68.9775	93.9488	76.0682	238.18	222.497	174.316
Aerococcus	68.8361	57.9537	65.4466	63.2456	76.0918	55.1098	45.1283	45.5204	66.5013	47.2004	75.6216	131.341	62.5623	81.9016	89.526	50.4792	49.1973	65.1413	132.547	247.014	195.402	51.5088	51.1981	74.921	66.9215	75.3684	58.4976	76.7913	58.4337	57.8948	43.1778	85.4039	48.8301	49.6787	45.1576	49.2958	40.5813	46.6491	34.5905	43.3222	35.9135	121.813	92.8619	80.3195
Aeromonas	76.2042	57.7241	69.855	68.6168	88.908	59.8092	48.0302	49.0111	71.3072	48.3674	72.749	128.125	68.1738	84.8802	94.11	53.3939	48.8796	65.5286	130.037	240.372	202.398	58.5757	58.0394	78.5636	76.6005	79.9453	58.1047	81.5415	64.9043	58.9795	43.8647	88.8485	51.9839	52.5815	52.5917	45.9941	42.6669	46.8479	38.1936	50.4593	41.2112	125.055	113.612	83.5542
Akkermansia	3325.27	851.103	1083.15	656.443	1282.82	749.902	2390.9	1036.54	3402.93	3512.42	1933.72	2058.32	5138.17	1808.83	1793.33	991.024	1020.31	1459.42	2622.14	1071.01	900.613	8837.9	2817.06	3840.34	514.088	1010.12	1509.53	1169.13	2306.75	7739.1	4929.94	1564.38	797.353	1144.48	1259.55	810.676	848.336	1074.34	546.332	1185.84	999.097	2082.62	1098.12	3030.43
Alcaligenes faecalis et rel.	307.475	203.628	249.035	270.198	306.311	218.402	164.815	178.658	257.928	193.336	281.955	517.542	247.033	354.2	387.732	201.124	188.696	289.61	532.607	983.257	747.536	219.401	227.863	312.737	272.611	315.242	223.166	311.386	255.292	259.228	172.996	362.691	189.385	199.055	174.479	179.19	150.119	172.085	137.04	168.015	141.332	464.091	385.145	351.01
Allistipes et rel.	7495.9	2267.72	4133.02	2897.58	6383.25	5146.88	13322.3	7400.29	16266.5	4036.91	4874.99	11743.6	8316.26	2973.8	4536.89	3673.77	4250.69	3797.72	13880.7	11892.5	9119.58	6685.27	4135.84	8482.96	4499.67	6982.95	4079.3	5139.25	4738.85	2344.16	2968.95	4045.08	4915.44	8856.33	7256.73	7885.07	1069.58	7658.17	814.581	1300.74	1350.31	4313.29	3932.26	5273.01
Anaerobiospirillum	65.0206	52.2197	63.2693	60.0688	84.359	54.6366	40.474	43.3718	63.5639	48.1365	71.7864	124.543	59.6705	94.4359	83.2728	50.4083	46.4836	65.606	133.064	242.658	194.925	52.4255	54.4114	81.0086	71.9271	85.0247	52.4083	74.3615	60.1224	53.5741	41.65	86.4607	46.0183	45.4842	43.1835	41.9753	36.9154	41.5955	33.9896	42.4152	35.3565	118.796	112.781	84.5109
Anaerofustis	110.255	68.9751	77.0411	73.256	98.6479	68.4661	79.7846	64.1324	102.174	69.2646	95.3461	159.192	101.751	106.167	117.591	72.8559	72.1445	96.2426	214.333	310.601	289.236	86.1436	62.4952	92.266	84.3611	95.333	82.2473	113.307	87.7374	107.613	88.5248	120.014	62.8088	65.6882	61.4254	58.9934	53.9561	61.349	49.0742	64.1314	57.1437	129.335	118.042	102.588
Anaerostipes caccae et rel.	16818.9	12734.6	17889.2	6110.15	7103.05	6410.15	28589.6	11191.3	23211.3	9911.2	9422.4	12536.4	19420.6	5589.1	10910.2	17370.7	12296.2	11209.1	11161.2	15769.6	15100.6	11339.9	3707	4583.79	10257.8	7573.93	17988.7	15931.7	25873.3	10097.1	9026.69	3491.73	7936.8	7092.63	11794.8	8418.63	12997.2	8923.83	14371.7	21600.4	16786.2	10099.4	8330.58	7496.33
Anaerotruncus colihominis et rel.	999.766	803.559	1347.53	926.727	1257.61	995.192	795.116	710.137	1157.13	1686.36	2623.05	2563.19	1201.4	1404.12	1639.8	1200.95	859.226	1266.5	2396.5	3943.25	3038.52	2870.44	1918.26	1790.01	962.122	1292.02	774.282	1093.76	1035.48	1662.76	2794	1782.76	828.709	927.854	979.167	742.692	644.391	864.64	599.85	776.44	826.408	1728.53	2000.9	2383.6
Anaerovorax odorimutans et rel.	2026.73	900.677	1168.84	939.821	1966.69	1530.39	1784.93	1845.23	2521.2	1120.67	1501.85	1909.95	2964.61	2796.59	2860.5	1025.14	1307.43	1257.77	2503.65	3318.04	3066.51	1838.24	1300.75	1573.17	1035.83	1078.98	1522.54	2149.01	2250.18	2551.51	3306.89	2346.55	682.28	891.329	1220.51	1510.59	1010.63	1610.16	1221.15	1747.64	2021.49	2043.08	1999.56	1842.83
Aneurinibacillus	81.2928	52.8402	67.187	64.9064	76.1246	56.9205	48.4303	48.1403	74.1806	53.534	81.3013	131.437	81.5943	84.9742	93.7289	64.7498	68.292	83.559	139.932	252.868	201.182	70.4073	58.1832	76.6256	72.6579	86.6329	67.3244	96.4957	76.2094	78.9556	66.7263	96.9926	52.7087	57.314	53.9787	55.7439	51.3339	59.8127	47.1919	57.8342	49.4806	113.463	96.4714	89.6265
Aquabacterium	103.432	71.9011	89.1899	83.8256	114.331	61.9965	56.3397	58.4475	79.6073	60.3334	92.3558	173.111	73.8458	105.399	130.684	56.3413	50.6776	69.5843	144.299	280.597	225.676	59.5144	75.959	110.58	90.1636	100.372	65.1999	88.067	68.8757	72.0638	54.2367	111.367	51.9138	51.6493	48.5598	56.0218	45.8338	55.5403	38.4822	50.1792	38.4201	131.818	122.102	113.323
Asteroleplasma et rel.	70.4834	52.0056	63.6204	62.0428	74.7386	52.2022	39.578	45.9529	61.4805	44.1836	78.6674	119.114	63.3122	77.9185	83.839	49.3712	46.9222	64.3394	132.815	246.17	188.876	53.2718	51.5902	71.8232	69.0013	83.1021	53.2492	73.9176	60.0962	58.1068	42.6242	83.7539	47.1831	47.7963	44.5507	42.3434	35.9765	44.2504	33.6162	42.6747	35.4723	115.199	98.8918	84.0676
Atopobium	142.42	103.467	125.222	145.235	191.144	135.93	83.9678	94.6021	135.066	96.5194	149.123	256.453	127.13	180.509	181.295	100.291	93.0676	135.684	284.372	487.502	377.283	110.231	107.076	164.161	136.184	164.44	122.719	158.777	138.542	126.551	96.5617	189.58	96.387	96.2503	88.4552	92.728	83.1923	100.369	73.6467	94.084	77.6015	255.779	224.313	187.28
Bacillus	229.822	179.984	214.792	199.772	273.715	172.054	149.885	155.666	215.364	144.223	250.411	403.404	203.865	275.999	302.992	157.37	150.17	215.051	425.708	804.286	613.343	165.259	190.103	277.343	242.061	267.324	175.076	246.734	191.238	186.233	140.456	286.766	149.063	149.391	138.35	150.678	126.305	137.828	118.76	137.453	110.593	368.549	326.372	262.787
Bacteroides fragilis et rel.	16142.3	1431.81	4925.95	1499.81	1960.31	1328.67	13949.2	2616.86	19464.7	645.495	1202.94	2216.21	2228.99	3041.87	1847.38	765.33	960.807	1089.89	4264.53	8450.53	6890.55	3417.33	1850.32	5239.96	2870.02	2844.66	2666.57	3663.07	2782.3	2700.32	2493.61	2646.63	1676.67	4633.16	1745.9	10285.9	921.216	4299.31	801.467	1162.7	1220.9	2056.06	1562.99	1808.74
Bacteroides intestinalis et rel.	1399.45	400.281	672.801	176.306	461.14	135.353	196.872	92.1543	254.038	522.301	1540.77	1993.5	150.517	184.165	129.273	86.8928	107.986	130.754	282.467	528.464	388.049	130.203	96.2712	158.684	230.135	216.427	106.117	150.557	105.417	216.482	376.594	250.339	213.76	620.686	192.936	633.482	123.986	623.333	85.5514	226.305	225.298	335.669	201.023	444.124
Bacteroides ovatus et rel.	8064.36	1468.12	2766	1528.52	1754.75	1418.23	2432.09	734.462	3223.28	604.014	1132.61	2671.88	2222.98	2390.79	1621.17	725.726	1017.82	1130.2	4006.97	6978.41	6089.01	1932	1204.22	2303.05	1684	1699.55	1237.69	1848.64	1282.5	3436.11	2411.47	2463.67	2024.87	4434.16	1617.81	5898.52	660.484	2357.87	452.103	856.466	680.676	1594.38	1187.36	1480.11
Bacteroides plebeius et rel.	2554.62	746.074	1351.8	980.916	1795.77	828.849	2145.76	725.952	2785.93	599.35	876.581	1568.87	1646.17	1748.99	1241.94	458.171	549.549	600.449	2226.91	4756.39	3190.81	1170.28	856.411	1423.88	1604.59	1969.84	724.941	1150.55	983.516	995.567	1118.88	1321.97	2302.78	3673.31	3801.87	2412.13	448.928	1194.97	410.615	636.345	632.223	1284.2	1308.96	1904.38
Bacteroides splachnicus et rel.	3090.6	1067.91	1637.96	1164.92	1507.53	1013.25	2109.12	990.16	2072.7	809.239	1440.2	2538.01	1491	1646.84	1548.87	1080.56	1185.8	1361.79	2631.19	4768.04	3767.67	1262.54	1092.87	1681.59	1661.79	1889.24	1176.78	1620.59	1262.58	1506.34	1144.32	1698.98	1191.17	1671.48	1354.11	1972.56	678.104	1490.14	584.451	805.664	708.91	2009.25	1764.19	1729.2
Bacteroides stercoris et rel.	1483.68	422.005	668.426	504.695	691.014	427.756	1013.57	434.973	1860.76	316.605	556.994	911.66	795.235	828.806	683.186	1651.96	2365.39	2219.07	1298.99	2645.63	2021.45	704.634	521.903	783.831	1678.62	1443.4	435.777	616.691	474.17	607.337	620.189	718.868	741.564	1154.4	968.731	3188.68	613.261	2047.96	284.692	490.935	376.917	882.553	742.25	995.036
Bacteroides uniformis et rel.	12408.2	897.84	3164.92	777.663	2264.34	572.331	2008.87	301.897	3969.58	135.995	230.675	684.354	2191.73	2428.21	888.162	130.031	140.691	165.028	2883.05	9931.6	5912.46	1904.64	1040.35	2627.04	2492.1	3128.23	343.945	688.375	702.008	2098.55	3210.16	2271.19	2753.55	6771.17	5526.64	6578.22	425.732	2072.37	577.688	1569.92	1428.02	550.648	571.728	1784.96
Bacteroides vulgatus et rel.	147655	14848	48274.3	16437.2	22933.4	4606.54	34200.4	4955.72	42629	4539.69	33860.9	60239.5	15961.8	8248.36	5726.66	1633.27	2262.39	2101.27	29947.8	30501.6	40678.7	16666	6682.25	9754.43	40640.7	19062.1	5008.96	11709.5	7394	1666.47	1780.62	1634.65	14381.2	41177.5	33957.7	135439	4268.6	53980.5	841.887	1608.89	2536.67	6315.57	11850.5	23393.7
Bifidobacterium	11445.7	7153.8	9278.67	43666	41084.8	23573.7	7048.56	7398.28	4822.7	3010.28	7690.7	6661.59	3085.62	3943.81	4857.64	1573.09	1330.4	2283.52	53990.5	26396.8	46800.6	23712.2	20783.5	17657.8	1879.76	2450.37	40939.9	35924.6	57443.3	6320.23	6495.01	6281.71	9478.26	22480.5	12092	10359.1	10096.2	12112.1	13072.4	24365.1	34044.9	13705.4	5252.89	22200.2
Bilophila et rel.	241.984	177.443	215.947	214.193	269.119	169.071	130.149	146.719	205.679	144.766	249.702	387.959	193.396	273.143	304.837	157.013	146.101	202.923	414.626	781.184	607.272	169.516	177.351	263.218	227.394	262.319	185.672	242.868	198.401	203.712	144.902	293.749	160.841	182.611	134.169	143.087	121.499	144.687	107.352	136.06	111.449	359.926	363.041	265.544
Brachyspira	129.204	99.8853	122.723	126.088	158.788	111.182	75.6127	93.5316	131.826	90.3162	138.452	259.755	117.03	180.673	173.209	101.438	93.8615	135.239	273.468	499.682	382.531	98.0947	110.195	173.861	136.478	168.804	101.077	137.775	115.182	109.021	82.9709	171.025	95.8742	93.9003	85.7798	85.206	71.7816	88.0372	68.2878	85.2144	69.4237	237.127	202.987	165.451
Bryantella formatexigens et rel.	12886.2	8950.66	8772.24	4360.61	13907.5	4996.92	14897.9	9286.19	34395.6	7218.01	6404.66	7295.15	20268.3	9041.49	10673.6	18288.1	7260.99	6758.78	5601.6	9275.91	7805.66	7464.88	2324.68	4114.34	6838.39	5352.62	6147.08	15861.6	6162.86	6970.83	4423.47	2811.28	5930.7	8145.81	2940.24	5461.06	3150.9	4221.1	3190.96	7970.77	9124.87	5243.48	6904.63	7461.23
Bulleidia moorei et rel.	338.505	248.515	291.033	258.999	339.911	240.263	174.453	192.303	274.232	185.846	296.604	507.055	254.649	350.417	351.53	211.366	199.554	275.104	599.949	1042.22	812.28	229.107	234.002	350.695	280.158	325.239	260.487	357.117	273.741	267.238	197.352	363.248	204.255	202.444	183.543	194.416	186.475	193.016	151.12	181.248	164.602	500.727	418.727	348.032
Burkholderia	153.282	72.0075	91.2356	76.0025	95.5876	70.1299	74.2572	60.9742	120.601	81.1485	99.7708	140.399	82.1177	89.6438	116.55	62.9373	60.7688	92.2593	146.262	269.922	215.954	66.9635	74.3786	84.1235	89.3677	101.765	73.0083	102.42	72.4315	79.2304	62.2816	99.1397	60.1374	69.7288	89.3409	73.0417	49.8996	59.1244	39.2602	47.3887	41.6176	129.129	105.984	97.8297
Butyrivibrio crossotus et rel.	19991.6	7585.2	11324.9	3260.52	8065.1	4125.31	18570	4739.29	19718.1	12014.9	8321.71	13074.3	10617.3	4158.2	5572.41	4334.49	4404	5284.53	3973.29	8036.45	5837.18	22287.8	4310.17	7145.81	6562.73	5756.49	7157.91	7594.52	6794.96	17114.5	10942.4	4082.14	9112.04	10379.6	8154.9	7033.04	3940.62	5525.13	3789.29	5839.06	6366.32	7746.52	8048	9829.74
Campylobacter	542.869	395.758	489.473	502.852	637.373	442.069	307.917	368.544	519.475	350.881	559.048	1009.12	460.743	683.964	672.105	394.461	368.877	538.226	1071.82	1973.29	1568.5	384.311	427.329	650.166	544.427	628.703	418.936	579.225	450.806	433.03	333.433	693.824	378.11	371.596	333.796	340.237	290.501	343.461	273.075	330.848	280.444	923.213	824.578	652.15
Catenibacterium mitsuokai et rel.	195.744	105.631	134.813	134.266	162.063	112.195	125.706	113.807	178.168	95.7912	146.205	252.35	140.208	169.522	184.367	104.36	90.8157	131.395	276.683	510.194	387.431	114.734	107.537	154.575	140.906	165.297	126.538	189.106	138.087	113.563	85.9118	173.42	152.379	184.437	229.578	99.8615	113.303	94.4214	77.8543	100.387	83.7149	244.374	197.914	185.758
Clostridia	1799.05	1360.22	1630.16	1802.75	2148.36	1451.89	1141.7	1242.39	1782.94	1232.24	1920.12	3319.7	1812.5	2199.7	2371.05	1303.08	1215.1	1692.2	3570.54	6396.35	5018.59	1697.34	1543.72	2117.53	1814.52	2175.98	1416.19	2011.45	1550.59	1748.18	1266.01	2301.04	1871.75	1472.54	1354.74	1139.81	1033.8	1245.32	894.442	1129.04	937.68	3038.08	2642.66	2113.13
Clostridium cellulosi et rel.	15112.4	5960.85	6012.3	2954.87	5310.03	4897.61	4574.82	2620.85	7316.77	14393.1	11381.6	9106.96	9088.77	6160.88	6038.1	1528.89	1603.37	1953.63	4100.87	5954.31	5138.9	24289.7	8490.36	9995.82	1935.24	2613.74	4671.76	8893.09	7990.38	8188.09	22557.8	8077.39	2391.55	3964.95	7478.38	3576.32	3187.81	4089.1	1890.62	1847.01	3298.83	12922.6	7924.95	12393.8
Clostridium colinum et rel.	2763.31	1670.51	1662.6	591.19	739.466	530.229	989.989	791.275	1511.96	573.138	735.149	1299.85	1212.36	926.985	1213.91	1594.73	618.998	2047.14	1480.4	2532.45	2141.05	2544.04	818.647	1110.04	716.956	775.08	821.715	1173.25	666.486	945.261	543.734	846.318	499.959	507.307	574.943	1293.55	1239.72	2173.37	355.707	462.943	456.887	2139.55	2254.42	1316.87
Clostridium difficile et rel.	1698.98	1243.7	1170.96	1154.06	1559.17	1288.39	1576.86	1061.71	1435.56	1222.78	1882.25	2773.7	1330.55	1511.72	1680.82	1056.05	879.601	1233.71	2342.39	4256.1	3361.79	1559.5	1196.57	1636.96	1295.02	1680.6	1316.48	1551.77	2159.86	2097.95	961.041	1510.61	1454.8	2187.53	1673.64	1114.3	2120.82	1188.14	689.636	1052.93	872.201	2044.18	1839.27	1631.32
Clostridium felsineum et rel.	70.2846	49.3853	60.3118	65.114	68.9643	51.5175	40.0655	45.489	65.1183	45.6057	75.6837	123.216	61.3203	68.3501	91.0115	48.3344	45.7166	64.5938	132.65	241.362	191.224	51.6194	53.6769	70.9307	72.1746	69.9206	53.5434	80.3961	61.7435	57.5861	45.0376	89.8298	47.2638	46.296	43.1886	44.5491	38.6695	48.6803	33.6606	44.6981	35.7374	106.301	94.8798	81.5134
Clostridium leptum et rel.	10032.3	4371.41	4466.94	3308.24	5640.61	2502.6	4206.85	2231.73	4755.38	13705.6	13899.3	7405.04	17814.4	10609.3	9810.49	1824.36	1363.11	1609.86	4521.19	5221.93	5247.47	32909.7	13190.3	16970.5	1398.72	2666.19	2118.44	2835.72	2378.54	4153.06	7211.19	3559.35	1622.55	1325.13	9434.44	1160.59	2012.29	2195.63	2235.97	3912.21	4153.2	8948.23	7048.25	13340.7
Clostridium nexile et rel.	4159.89	2182.72	2673.58	3343.1	13827.4	5351.85	4828.11	3058.9	4534.6	5231.34	7157.5	4937.52	9582.35	3325.44	9650.67	2064.83	1454.44	2067.73	6494.41	11527.2	8659.85	5165.55	1773.83	3006.52	6165.78	3911.05	4604.48	6286.66	3527.98	14026.8	13478.5	9544.9	1895.17	2122.23	2232.76	12054.8	5817	11569.1	9880.19	9753.65	12947.3	2206.72	2561.25	3121.6
Clostridium orbiscindens et rel.	30108.3	11005.8	14485.6	2995.19	6640.86	8646.4	11831.5	5735.28	11476.9	6774	6804.32	6311.48	12137.2	9432.02	10943.1	14149.6	14762.8	15835.7	10290.8	13279.3	11321.5	19817.1	9338.47	10579.7	6133.88	6206.67	11419.3	6722.51	10462.5	12835.9	15228.5	7484.59	6793.88	9577.87	9903.36	7953.43	4010.05	9325.92	3755.73	6368.89	7436.74	17799.5	12596.6	13375.2
Clostridium ramosum et rel.	652.656	325.868	405.037	343.681	447.935	307.309	435.546	287.793	446.832	242.909	392.616	642.451	385.749	467.313	471.124	435.62	524.131	846.126	799.691	1398.71	1115.19	314.397	294.429	411.233	421.246	463.561	359.404	510.073	360.968	290.009	213.595	424.204	313.226	335.746	239.953	283.868	339.272	263.396	225.167	279.74	227.423	701.373	534.397	508.487
Clostridium sphenoides et rel.	21147.3	10451.8	10423.5	3948.47	5490.33	4667.24	11981.3	8056.99	13272.7	12109.5	10014.8	9494.13	17973.5	8359.57	11964.4	7494.84	8425.27	11724.7	9994.23	12491.3	12651.4	8420.49	3085.69	4616.03	6903.67	5691.92	7415.09	11049.2	10553.9	9232.99	5123.05	3930.96	5782.73	6776.58	8332.83	9422.78	5610.63	7628.27	5277.82	9108.67	8708.85	7833.53	7120.92	5982.22
Clostridium stercorarium et rel.	1142.1	1037.23	1235.15	624.116	1873.14	1515.7	2146.84	560.385	2496	556.011	674.279	1287.21	1120.25	627.586	809.583	879.591	279.138	422.173	964.971	2043.7	1489.14	1665.29	410.507	665.217	689.744	601.68	1108.84	1412.44	1486.92	519.74	490.393	565.084	747.443	1197.34	1888.46	594.118	386.36	576.514	884.61	1513.41	1759.02	1334.58	1275.28	689.639
Clostridium symbiosum et rel.	14803.2	9669.73	8123.15	4969.58	12358.6	6502.8	21607.1	5919.05	24036.7	9839.96	8771.77	10307.7	27230.9	24458.1	18664.5	12351.3	7764.79	10078.3	8968.47	14637.8	12003.4	11704.1	4112.61	5678.85	8275.35	6808.91	8388.92	12618.4	7607.29	13589.4	9971.13	7044.68	11357.1	7050.4	11269.7	10374.7	6488.35	9940.03	4406.98	9663.91	6788.4	11403.7	12847.5	15016.5
Clostridium thermocellum et rel.	66.268	54.1319	66.1024	67.8813	80.9754	57.4581	39.1633	47.3376	70.4055	44.8545	76.6844	124.759	65.7734	90.8908	96.4999	50.633	47.5415	72.8672	140.783	250.993	196.309	49.9855	58.9316	83.4374	70.1911	85.6234	53.5495	73.2854	56.5287	56.5641	43.9995	91.7649	49.0684	49.2863	42.158	42.9067	36.1147	45.7707	34.5381	43.6982	35.406	124.089	101.478	85.9961
Collinsella	1026.91	740.301	888.698	1143.68	2153.4	1161.42	306.069	297.039	387.062	490.449	1064.85	1269.34	1012.65	801.677	1509.22	335.993	303.804	397.596	734.532	1340.14	1057.96	708.117	569.062	759.3	687.715	644.535	1831.41	3158.89	4994.82	2125.15	1597.79	1343.96	506.212	649.386	793.168	1703.39	1893.51	1606.85	234.915	318.551	267.054	1233.77	963.829	1141.42
Coprobacillus catenaformis et rel.	1409.26	666.698	690.128	398.27	648.856	412.341	1255.97	594.362	874.653	230.954	380.524	624.7	578.068	496.337	592.776	250.591	240.118	336.098	927.494	1608.35	1280.35	550.763	392.701	521.559	666.501	661.867	663.288	1043.24	582.316	279.889	209.148	448.531	538.71	596.367	306.229	521.703	598.79	408.63	303.221	382.594	393.599	995.135	651.298	736.98
Coprococcus eutactus et rel.	34821.5	36558.1	34144.9	9711.11	23037.6	15011.6	124242	103537	113911	28387.9	24210.9	15864.3	81286.5	27455.1	42355.4	60587.9	69761.2	104442	16532.5	32187.5	32342.3	43696.9	14823.1	17994	11625	10995.4	24649.1	40951.1	89169.2	44812.4	55372	18317.7	9552.61	21941	17313.8	73551.8	66795.1	56832.2	35814	60845	43330.4	27101.8	60318.7	37705.4
Corynebacterium	213.517	160.718	195.64	204.352	236.815	169.425	127.005	155.799	197.869	134.367	239.972	381.063	189.277	271.048	283.997	150.191	147.096	199.275	409.595	759.134	571.193	154.447	168.828	232.137	216.345	256.419	167.535	231.79	182.986	183.278	132.552	272.942	146.141	154.874	133.764	133.458	113.375	133.758	105.962	128.384	110.705	374.303	341.253	271.51
Desulfovibrio et rel.	365.539	290.051	377.055	375.256	445.093	316.75	211.378	269.799	332.347	229.659	465.204	821.044	333.268	504.906	478.876	278.104	262.102	356.384	779.535	1450.23	1097.29	263.747	339.318	471.283	389.582	481.348	273.409	386.955	300.281	299.785	240.977	555.43	261.807	278.085	219.682	218.791	189.317	221.814	181.546	223.127	181.101	659.153	568.262	479.355
Dialister	616.585	522.816	750.037	814.032	1988.85	2305.71	289.642	313.639	1317.51	292.892	423.888	751.416	495.516	577.149	670.042	902.241	570.053	418.423	3976.55	4277.12	4392.96	810.371	722.426	503.146	414.556	453.882	316.524	436.223	345.676	569.058	331.923	538.326	337.254	292.727	667.918	4910.89	419.414	4214.34	1742.76	3669.11	2089.34	692.418	583.763	501.958
Dorea formicigenerans et rel.	22341.7	12673.7	12251.3	4178.31	9860.24	5711.44	20127.1	9421.49	24770	14048.3	13937.1	13407	26465.8	8646.64	12954.9	17270.8	13291.6	15357.5	9578.08	14082.3	10865.5	14423.5	5000.42	7594.7	9368.33	7010.16	23730.3	34125.1	41181.3	20311.9	16758.1	10040	5642.99	10496.8	9419.14	18107.5	12244.2	14646.4	13609.3	23853.3	19275.8	9984.73	11219.5	12287
Eggerthella lenta et rel.	541.407	370.209	467.029	417.086	528.734	359.361	534.922	444.535	609.003	426.559	680.551	983.654	448.589	604.231	587.746	440.903	385.389	511.545	920.186	1603.76	1239.69	355.282	366.79	509.673	529.485	580.535	462.822	613.675	523.13	513.828	412.881	619.084	313.259	337.863	306.581	330.278	291.191	342.288	328.846	459.835	637.873	804.051	706.743	624.009
Enterobacter aerogenes et rel.	1002.74	615.662	730.499	800.689	958.223	706.939	604.067	532.593	670.062	467.834	780.259	1209.82	688.823	890.625	991.062	497.194	477.407	669.168	1729.84	2552.09	2162.65	689.711	641.33	884.493	752.872	836.134	731.158	900.352	776.593	789.548	568.386	896.279	516.172	550.464	454.406	563.779	493.523	540.011	409.526	500.996	443.441	1146.57	991.959	936.165
Enterococcus	517.003	387.306	515.675	476.607	582.462	407.011	1105.71	339.415	502.263	327.296	575.968	894.58	462.442	687.382	687.648	426.216	412.201	547.727	975.14	1800.58	1392.28	372.151	419.603	600	509.721	585.522	400.746	574.214	423.476	434.466	341.426	662.114	344.713	351.503	326.866	319.311	283.173	316.836	254.593	311.496	258.644	828.442	750.201	594.757
Escherichia coli et rel.	943.514	687.7	831.46	844.225	1060.41	769.07	597.527	671.908	844.786	616.606	1017.24	1632.26	864.277	1199.77	1216.62	669.82	618.448	871.339	1773.44	3275.24	2564.86	704.805	745.742	1125.73	948.375	1130.47	729.125	1000.79	778.977	870.7	573.753	1186.89	648.583	666.483	573.951	585.482	573.988	578.844	473.684	581.183	477.222	1497.4	1310.05	1085.62
Eubacterium biforme et rel.	1438.45	709.685	771.071	465.3	1041.68	418.362	766.502	516.886	1016.44	736.745	937.413	1156.62	431.543	442.495	481.076	494.97	1043.63	618.659	703.644	1246.71	976.341	2234.93	1086.23	1206.51	671.173	592.504	3066.01	3487.89	3816.56	1292.91	937.765	710.754	681.696	939.168	2000.85	708.662	876.638	680.168	275.834	626.329	779.52	662.274	608.994	636.968
Eubacterium cylindroides et rel.	350.795	255.358	309.795	315.231	406.197	279.404	249.106	250.442	360.538	222.341	355.283	620.06	347.168	485.75	452.793	749.828	553.789	653.992	711.641	1268.92	968.118	292.932	278.857	404.531	351.524	403.011	273.02	370.464	288.162	295.577	225.665	440.993	244.93	259.176	215.393	222.357	189.355	224.569	213.754	239.708	272.848	594.947	502.949	426.156
Eubacterium hallii et rel.	8754.08	3256.55	3224.05	2167.21	2971.39	2895.3	12243.1	4567.35	10164.6	3464.4	3318.24	2934.91	10043	1789.61	4954.91	7985.3	6610.15	7915.15	3667.73	4684.99	3954.41	5215.78	2279.16	2485.33	2157.82	1736.13	7723.11	8601.58	10846.9	10462.5	10817.9	3891.72	3858.67	3335.31	7458.28	3343.87	4278.85	3763.11	5832.93	9092.82	8906.63	3013.29	3350.95	3760.69
Eubacterium limosum et rel.	221.21	158.842	190.032	191.018	247.952	170.451	144.183	143.281	207.287	145.356	231.228	383.157	211.553	276.131	278.786	168.971	156.155	219.185	414.375	756.427	592.455	170.799	173.617	262.887	226.915	255.657	177.792	236.879	184.449	181.847	139.174	268.587	152.487	152.31	143.319	138.424	122.932	138.006	110.634	141.641	113.473	353.099	306.123	263.238
Eubacterium rectale et rel.	4603.62	1909.2	2727.34	1297.77	2407.34	1349.38	1726.15	954.127	2265.82	6483.9	4638.43	5876.49	8640.22	1790.96	4554.1	3165.46	1852.58	3188.21	2081.22	6569.46	4657.73	3414.37	872.562	1897.84	2684.1	2114.28	8272.89	10414.1	3704.55	3779.06	1307.6	1295.41	2585.01	4640.03	4096.3	6670.75	3101.04	7567.34	864.577	3283.53	2759.35	2378.14	3281.9	3785.61
Eubacterium siraeum et rel.	375.054	219.156	461.941	268.897	351.912	263.605	471.207	291.119	793.294	213.645	343.12	528.714	382.338	368.075	395.358	255.781	230.238	328.499	568.431	1083.7	830.684	329.477	246.651	340.044	338.58	530.241	335.064	394.446	337.659	748.628	526.062	490.168	417.943	503.878	394.542	224.099	181.278	265.035	145.38	233.867	247.916	547.63	427.528	359.826
Eubacterium ventriosum et rel.	12932.3	5092.64	7860.91	911.034	1561.03	834.651	8797.25	2540.45	7469.38	6430.6	4773.11	4039.81	8887.11	8122.85	9910.83	9203.22	6541.08	4962.75	1388.06	3098.94	2547.25	2890.25	1059.73	1491.13	3512.19	3170.83	19131.3	20239	25650.6	17768	9435.15	3015.09	2954.6	2424.78	2205.37	2873.77	4673.1	2938.93	1091.44	6760.38	6327.15	14387.5	11679.1	7450.69
Faecalibacterium prausnitzii et rel.	168007	66048.5	54632.1	40579.4	72057	44296.1	156859	25709.8	102925	47163.1	30585.2	47436.9	73719	29046.6	17137.9	8844.85	3695.18	5604.1	9027.23	28816.3	24048.3	78184.9	11658.6	37133.3	40945.5	16984.3	84659.7	137901	81152.3	157975	25382.9	12118.3	63535.7	53849.1	82735	71446.4	35277.8	113593	7224.91	37515.4	100898	33228.1	28734.8	43978
Fusobacteria	651.492	483.947	564.57	593.554	714.448	493.882	367.918	407.644	552.463	405.849	667.578	1113.19	568.852	788.467	818.406	453.837	420.382	573.665	1210.47	2250.13	1769.55	452.343	499.789	744.128	652.246	737.977	511.297	691.342	526.414	510.957	377.865	807.914	438.032	435.066	402.905	393.626	330.047	387.691	311.358	384.177	318.002	1021.88	871.28	739.92
Gemella	82.4074	51.3652	61.1761	62.9369	77.4226	56.3319	40.6528	45.9252	63.145	48.8057	72.0144	123.444	61.3975	85.5057	86.8344	50.2007	47.0525	67.467	137.539	249.715	193.972	49.8003	53.6614	73.0991	69.5069	82.0375	57.745	78.0951	62.8483	57.9288	52.4141	86.1745	52.255	53.3813	43.7231	48.0704	38.7302	47.9651	33.9062	43.5355	35.2497	118.531	99.8866	83.4016
Granulicatella	105.912	53.4729	65.4836	68.2122	82.3255	61.4033	120.597	48.2854	90.6963	60.118	91.9252	132.605	76.4524	87.8921	97.6926	61.1559	59.8294	67.8301	136.924	256.546	210.061	58.9003	52.9691	80.4624	71.6842	81.9027	73.4155	94.3236	66.8571	83.8201	66.1407	92.6492	50.768	56.3762	53.2847	55.5424	57.4705	58.2492	36.8938	49.8655	38.6944	122.075	112.819	88.2026
Haemophilus	137.868	96.0507	125.962	129.633	151.413	109.976	86.5134	95.3413	124.343	88.5465	138.715	249.648	119.714	158.253	172.311	100.372	91.7368	126.609	256.715	488.053	388.894	98.852	103.525	140.39	136.408	151.192	97.4298	134.479	113.848	110.461	83.959	166.498	102.991	99.9761	84.254	83.9919	74.4809	86.9446	68.1779	82.6692	69.6457	236.188	201.225	166.991
Helicobacter	346.541	255.51	308.085	315.298	401.703	276.601	195.932	226.913	353.379	222.919	367.065	615.707	321.848	427.423	431.663	244.341	233.393	374.011	668.67	1254.85	969.086	248.254	276.466	405.266	337.803	401.61	259.891	371.146	287.389	274.021	217.201	441.694	239.503	237.545	216.202	217.036	189.369	231.436	169.157	219.343	176.267	570.461	506.331	414.466
Klebisiella pneumoniae et rel.	514.287	354.168	419.593	439.713	543.964	378.132	311.265	329.149	401.69	291.783	475.499	765.918	414.773	536.406	584.857	311.703	301.34	415.285	942.76	1575.04	1242.92	370.791	367.579	519.895	458.824	527.979	368.213	494.291	403.594	407.891	289.813	573.698	312.82	314.525	274.736	304.029	277.586	283.016	229.623	284.824	241.13	720.215	630.276	541.772
Lachnobacillus bovis et rel.	17394.2	7180.92	8644.01	1703.77	3212.41	1977.38	23882	2265.81	18252.1	3047.95	2511.27	4972.45	3220.71	1437.91	2521.52	1637.03	1640.96	2521.91	2043.05	4178.53	3101.56	13050.1	1210.7	2372.63	6549.73	4451.79	2919.59	3461.88	3845.76	2822.86	1856.6	1618.84	2596.81	2603.05	2596.26	2337.74	1721.21	2280.26	1461.41	2613.08	2641.77	3926.08	4312.93	3299.25
Lachnospira pectinoschiza et rel.	12749.9	9564.88	10076.9	3323.74	13778.8	3169.86	7811.79	6198.84	10790.9	9398.94	10470.7	10864.5	3630.52	1882.9	2699.65	4995.96	9201.19	5897.51	2650.97	5246.79	3934.72	19242.8	13808.8	13951.4	8134.39	7745.85	20061.3	20165.8	27772.6	14001.2	10610.1	8295.14	5361.34	7691.1	12112.4	7245.38	6626.04	6836.55	2165.68	3941.88	5121.32	5190.15	7157.89	7355.95
Lactobacillus catenaformis et rel.	129.599	92.5986	106.613	131.172	144.927	122.975	70.3776	93.8108	114.959	103.956	117.704	250.462	111.354	168.088	174.912	100.947	95.4631	130.174	241.108	479.731	360.215	93.6324	112.771	154.257	134.275	140.848	102.513	132.959	111.991	104.119	80.8126	194.202	96.7878	91.0089	82.8028	83.3195	72.4369	82.8223	67.9091	81.69	68.277	240.779	176.225	146.609
Lactobacillus gasseri et rel.	1041.28	2795	3542.53	773.676	980.55	688.224	543.773	619.467	807.941	600.897	935.564	1520.54	792.998	1041.81	1177.68	609.956	578.686	805.101	3903.52	2995.57	2408.39	660.584	675.123	962.174	838.39	1006.48	921.173	950.219	802.919	737.172	1834.09	1855.22	622.016	601.254	621.258	580.369	480.882	577.818	423.203	545.868	442.571	1408.93	1254.5	1019.44
Lactobacillus plantarum et rel.	1357.76	961.917	1132.89	1137	1469.72	998.148	914.085	1839.7	1134.67	804.599	1292.27	2166.01	1188.97	2078.22	1622.74	857.032	833.45	1155.11	2372.44	4304.78	3294.36	1033.24	1574.5	1484.31	1250.73	1448.95	1059.13	2192.31	1427.28	1265.89	2731.47	1580.47	856.968	858.534	1353.43	839.759	871.154	823.156	609.922	3455.12	661.875	2002.29	1753.6	1429.92
Lactobacillus salivarius et rel.	205.451	152.686	187.042	189.872	224.576	174.397	123.546	138.573	196.785	138.22	214.269	372.212	180.722	244.183	262.134	147.908	139.048	196.317	400.354	730.142	575.191	146.132	161.83	226.993	207.59	239.659	159.466	211.966	170.005	164.628	124.959	253.907	144.869	140.943	128.566	133.644	112.106	130.4	101.147	126.11	106.592	351.727	309.713	252.213
Lactococcus	254.531	182.235	246.241	233.915	226.638	224.111	163.557	273.404	211.739	154.113	240.584	396.483	396.429	364.695	322.384	17231.2	475.075	459.376	418.668	747.725	642.633	4550.45	2009.72	8943.94	1656.13	1900.12	241.757	229.793	961.118	171.33	349.588	307.674	230.698	252.992	802.179	242.309	197.677	134.888	840.504	127.799	113.246	393.942	307.537	254.656
Leminorella	84.8509	55.3982	70.2304	68.6864	88.6309	57.2088	45.4566	48.0441	72.4015	54.1088	79.6837	178.291	76.3274	85.8774	96.5874	50.2285	50.1165	65.254	134.087	252.575	198.107	54.6649	58.6382	82.1408	82.2665	78.999	71.9834	101.332	67.8218	74.9613	52.5177	91.9635	51.6373	60.8858	46.4114	55.0464	38.2775	52.5405	35.063	42.0606	37.1035	118.945	100.406	90.6746
Megamonas hypermegale et rel.	197.941	155.61	183.57	193.682	234.464	162.244	113.221	135.362	188.557	135.594	212.85	379.898	175.905	252.555	274.687	148.058	142.948	197.471	399.996	741.825	588.707	143.975	167.123	242.18	201.247	230.408	157.368	219.026	169.156	164.422	124.287	267.734	142.094	142.083	127.279	129.276	108.707	136.559	102.814	125.283	103.904	352.994	303.168	235.869
Megasphaera elsdenii et rel.	406.266	305.816	368.311	371.428	489.27	328.699	243.515	275.921	385.161	292.106	436.103	759.801	348.605	500.62	540.734	301.587	279.783	385.003	819.462	1496.46	1146.54	303.352	325.853	464.083	412.036	494.741	345.186	480.239	359.385	390.882	265.627	528.55	293.137	287.425	254.979	265.646	228.085	282.256	208.229	259.195	215.557	698.162	617.803	498.632
Methylobacterium	67.0672	50.0287	63.3068	68.1055	78.0972	56.0749	38.241	48.1739	62.6692	46.0787	67.942	125.571	63.833	83.4842	101.278	48.6525	46.6098	64.9252	143.625	257.35	189.615	49.8638	51.6754	90.8575	74.7355	77.772	53.8178	74.9512	56.5328	49.5406	41.8914	89.9219	49.184	49.2711	44.1543	43.1125	36.8423	41.815	33.2881	39.8864	35.073	123.864	111.116	82.6359
Micrococcaceae	67.0875	51.5232	68.0727	68.8124	73.1339	56.6406	42.7962	49.6221	60.7331	44.4959	83.2918	124.504	61.0117	84.8093	87.476	54.4799	49.476	64.6683	135.983	256.366	201.948	52.1804	57.2243	79.3298	71.3371	82.0443	53.2246	72.0267	56.7283	55.173	43.2092	92.978	46.239	50.8302	44.2529	42.9451	37.2126	46.0469	34.3274	42.457	35.6227	115.918	105.1	83.9755
Mitsuokella multiacida et rel.	189.308	143.932	173.358	181.237	235.633	254.606	113.632	133.428	192.093	137.14	208.455	371.69	162.441	266.36	258.43	149.347	138.604	193.414	408.66	748.01	581.582	145.237	159.195	250.221	196.606	224.208	155.607	218.904	168.011	166.67	125.303	245.956	140.086	136.463	131.678	132.838	109.926	132.874	102.843	123.686	105.937	340.398	296.89	246.032
Moraxellaceae	132.692	98.2292	127.336	130.678	155.113	112.404	77.0942	92.8262	127.084	88.0327	150.711	249.727	122.234	169.524	177.816	98.6957	94.8478	135.402	274.883	493.099	397.679	96.3439	110.171	151.917	137.388	161.845	106.563	147.003	114.417	107.861	82.3858	174.235	92.3887	96.8677	86.3976	82.7556	71.8141	87.0773	68.2434	86.3178	69.3953	229.846	188.975	166.881
Novosphingobium	76.8913	64.8371	74.7817	74.9054	86.6259	59.752	47.2572	54.2347	77.5488	49.079	96.5233	122.398	68.9449	84.8246	101.077	56.5221	53.6838	67.8871	145.791	263.465	199.827	58.3898	63.3511	80.3849	79.4086	89.3076	60.8123	85.2732	67.1678	70.3688	52.4049	96.9836	57.8044	68.0178	56.3656	47.6632	40.5345	46.5997	37.554	52.1025	41.4812	126.304	112.906	103.358
Oceanospirillum	273.598	207.388	244.199	265.613	311.331	231.075	200.568	209.522	267.643	180.567	303.777	486.395	279.048	352.604	372.048	203.179	188.04	261.246	553.389	1022.86	784.121	197.706	222.222	327.159	271.183	308.578	209.015	286.136	232.382	216.403	165.13	353.702	283.951	210.428	177.701	170.495	157.16	179.999	140.479	173.654	147.425	462.184	413.186	333.596
Oscillospira guillermondii et rel.	14332.5	2514.62	6373.43	2615.71	3865.26	3778.79	10483.8	4862.64	9358.79	16806.6	18848	10835.9	12907	6373.23	12239.4	4212.89	3459.28	2975	6835.65	21807	9262.75	19326.5	7885.18	10719.7	3710.77	10240.7	3368.75	7247.22	4622.61	65339.3	70009.8	14342.3	4242.39	5533.9	6391.87	3750.32	3165.07	6123.52	2949	9396.32	10283.4	24295.7	20329.9	29438.5
Outgrouping clostridium cluster XIVa	7928.1	2992.32	4295.23	3367.77	9375.04	5578.78	9300.47	3957.35	5769.72	3839.98	3955.32	5071.89	6978.45	2755.91	4307.48	41677.3	39682.9	48692.9	3472.8	5503.95	4506.5	6302.18	1997.62	3149.18	32405.6	16231.3	5273.49	6659.54	7743.45	12413.6	7842.76	2669.38	11245.8	5473.38	9962.49	13352	7265.7	16472.3	6889.07	13655.6	13902.3	3973.38	3983.17	4441.89
Oxalobacter formigenes et rel.	1111.03	551.236	578.309	557.964	926.116	393.515	406.59	265.461	459.078	1013.36	1261.28	1090.61	1333.14	1250.84	1096.56	233.071	224.489	323.134	502.575	896.576	712.15	1618.64	1134.23	1719.21	343.843	423.146	359.927	405.203	394.41	1088.61	562.155	547.08	304.535	735.67	898.094	263.641	225.459	243.18	172.569	218.501	193.456	1379.57	643.745	992.001
Papillibacter cinnamivorans et rel.	10888.7	3700.34	3794.53	1885.28	6437.38	1686.67	3925.57	2369.8	8852.46	5669.61	2831	5834.5	2637.34	1071.62	1474.72	2857.91	1266.4	2633.55	2206.03	3879.77	3137.1	5835.09	1019.1	1381.56	4869.75	2212.97	5723.13	7588.74	9075.94	2679.04	1525.62	1898.34	2196.83	3077.4	3395.03	2865.04	1215.82	2616.24	695.741	1846.86	2116.33	6771.47	5023.83	5414.24
Parabacteroides distasonis et rel.	9217.4	2616.7	5003.1	1306.59	2881.08	1074.46	3587.8	972.247	4085.31	586.307	1128.37	2661.61	1052.93	1163.8	1151.66	5456.43	7006.12	4930.23	2357.03	3730.01	3077.85	1890.88	1389.61	2650.98	2908.54	2740.52	4135.94	5338.92	2433.6	2225.27	1809.92	2468.97	1760.11	2990.31	1858.23	7258.65	624.552	5322.19	443.628	750.672	703.32	2863.26	2055.14	2528.09
Peptococcus niger et rel.	309.633	221.685	283.375	269.715	338.96	238.815	189.504	201.339	284.643	240.222	368.022	544.169	439.203	392.396	434.595	211.27	201.494	277.579	628.085	1017.75	833.63	248.435	250.787	340.155	308.442	337.289	234.91	330.256	296.716	359.316	354.125	429.988	204.114	197.216	218.976	193.266	194.425	239.452	178.645	243.449	217.491	487.673	407.901	351.11
Peptostreptococcus anaerobius et rel.	72.5126	53.7224	62.6935	66.0433	85.1802	56.6018	41.3987	46.2595	63.4329	52.5694	89.5205	130.255	61.0104	87.7859	99.559	51.1999	48.6295	66.526	139.442	253.528	203.425	52.5099	56.4814	80.6833	81.1353	87.7898	56.8692	75.5469	60.3067	57.297	43.8236	90.9705	47.0324	49.8431	43.5893	49.4279	43.3073	47.3252	35.9485	44.0971	37.1841	119.197	110.22	85.8362
Peptostreptococcus micros et rel.	327.189	250.507	299.848	300.808	389.846	279.059	199.478	227.624	331.044	227.382	363.849	624.762	298.356	425.466	421.74	247.965	230.65	327.053	692.911	1274.7	979.991	253.864	272.864	406.564	342.83	409.404	270.471	370.634	284.783	280.824	216.33	448.836	238.572	240.007	214.274	217.984	183.143	217.697	172.183	213.8	176.103	587.55	525.858	414.542
Phascolarctobacterium faecium et rel.	545.652	407.603	490.481	493.519	625.106	456.414	308.889	357.739	529.402	705.74	843.428	1250.56	604.071	820.98	811.26	405.402	366.814	523.265	1100.97	2005.15	1580.14	732.191	485.149	788.891	671.344	785.172	633.546	962.792	711.451	426.923	345.942	743.439	606.134	747.413	814.796	630.097	316.525	474.37	276.096	338.485	278.548	1375.54	1479.94	1068.55
Prevotella melaninogenica et rel.	1735.31	938.231	1170.13	1171.08	1451.3	2690.35	1676.28	976.724	3090.99	933.824	1501.72	2354.7	1177.15	1584.82	1603.01	880.81	972.563	1200.2	2485.84	4606.97	3580.27	1569.79	1047.66	1507.09	1323.6	1537.72	7792.71	54767.1	30347.5	197977	28794.6	9582.24	1706.03	2281.58	2955.25	879.593	1154.51	831.11	737.178	943.777	873.025	2107.64	1803.7	1625.99
Prevotella oralis et rel.	1032.75	375.243	522.804	444.076	604.598	443.627	557.331	323.575	671.533	354.921	651.505	944.297	502.563	647.133	607.013	325.532	350.912	473.075	968.005	1824.5	1444.94	483.285	390.708	584.417	596.649	647.826	1698.47	11053.8	6557.75	32319.2	4485.42	1887.43	2927.23	4682.67	3938.64	632.78	311.559	448.662	673	850.368	1706.17	735.552	653.417	616.737
Prevotella ruminicola et rel.	202.372	120.594	155.092	150.611	187.111	132.756	112.616	104.491	168.492	102.862	186.08	292.351	153.825	189.72	198.408	116.746	124.227	163.891	328.138	607.494	463.354	136.9	127.735	193.842	178.342	210.198	136.768	188.688	138.403	149.359	111.482	197.145	146.455	169.976	153.119	133.454	94.0835	116.054	75.9357	102.218	88.6174	252.441	209.771	191.49
Prevotella tannerae et rel.	3908.66	557.04	1166.06	472.018	680.601	316.682	1393.15	371.557	1835.5	649.117	1930.44	2315.8	746.315	610.524	548.242	389.945	497.775	527.232	1184.27	1758.65	1640.15	535.739	347.681	514.904	4969.34	2225.87	457.63	738.168	466.44	341.476	304.559	444.309	672.85	1409.98	938.47	2297.43	287.948	1445.06	175.71	336.174	289.868	580.123	580.479	904.202
Propionibacterium	244.767	168.207	214.099	212.247	259.438	178.578	143.793	152.583	215.576	145	264.276	391.015	206.294	378.858	298.014	156.92	149.223	201.488	426.151	792.158	621.085	165.531	180.575	259.029	226.446	255.741	170.959	242.985	184.466	227.39	130.871	286.378	152.887	161.626	148.483	150.053	121.179	143.392	103.576	132.541	108.342	356.683	322.786	254.556
Proteus et rel.	564.401	450.074	522.616	530.037	664.769	441.225	329.034	372.405	484.822	363.175	593.89	1002.67	516.846	696.804	757.822	393.032	388.366	541.208	1079.07	2009.32	1570.59	403.687	457.774	627.716	577.651	672.137	446.076	619.061	478.145	464.148	351.709	705.237	390.004	385.606	355.665	357.827	306.17	345.622	283.882	357.181	293.345	933.943	800.106	660.872
Pseudomonas	129.849	107.141	131.419	133.775	168.163	111.293	91.6774	98.9661	149.038	92.2863	145.769	240.809	120.917	189.146	166.946	103.599	93.6639	127.191	258.07	490.48	385.621	102.945	110.902	160.917	137.742	155.956	112.663	152.069	117.074	112.835	84.1138	175.55	96.9606	102.588	88.7567	83.6699	77.1711	84.6643	68.1895	86.0994	71.2456	239.84	219.884	158.99
Roseburia intestinalis et rel.	1815.18	796.586	1266.38	1158.23	2332.04	1006.61	1535.56	673.213	2002.1	1149.4	1278.7	1536.03	2148.64	763.68	1649.08	841.573	617.077	1094.57	912.594	2311.27	1799.92	2941.77	629.297	1165.02	2101.96	1125.22	2009.18	2926.03	1829.95	1006.52	529.128	649.962	3596.19	1419.21	1868.13	1611.86	1263.69	2481.55	858.461	2675.61	2095.96	1427.72	1540.5	1598.02
Ruminococcus bromii et rel.	8697.07	4806.68	6613.56	3703.91	13153.2	8642.37	5132.61	2245.85	5879.79	13542.5	13499.3	7005.62	22680	14212.5	12886	1064.98	423.044	780.903	1511.02	4706.77	1925.66	50321.7	19634.5	29129.3	290.075	336.622	679.464	703.005	5452.35	1352.71	771.003	919.279	2461.17	3521.03	13940.7	4277.7	2148.71	2506.81	341.34	761.822	609.127	8013.86	5360.67	5808.32
Ruminococcus callidus et rel.	5100.57	2994.71	4605.95	2954.83	7244.16	4284.82	5190.09	1731.35	5145.05	24685.6	13521.3	18416.2	16786.6	5167.65	11084.3	1209.45	838.337	1158.3	3238.39	5838.71	5857.12	8781.33	4580.2	4645.63	2263.97	3269.01	2446.54	3765.29	17118.2	9547.7	3541.76	2473.68	2098.08	2699.47	4042.92	6278.65	6028.51	15401.3	4830.43	2565.91	12337	2558.93	3074.81	5412.97
Ruminococcus gnavus et rel.	6774.27	6675.35	5749.65	2910.02	12490.9	1993.19	3640.44	1469.42	2678.37	2333.86	3204.71	4038.24	6466.81	3020.21	3795.17	9316.58	5179.02	3903.6	2573.6	4085.93	2753.94	7058.66	2183.21	3887.96	3365.71	2088.34	2514.41	9928.77	3240.39	5645.99	3585.16	1839.1	1239.74	1267.49	1466.69	6376.48	3198.67	3876.74	8597.95	8026.4	13965.9	1680.5	1503.53	1575.5
Ruminococcus lactaris et rel.	15924.4	2074.28	877.659	1191.91	4759.98	1680.79	19124.3	13605	6431.11	7193.36	7260.54	3253.77	1044.28	530.521	672.823	833.114	872.441	1156.71	1902.55	2404.63	2408.04	1671.85	603.064	908.892	616.965	611.903	6224.22	2940.04	16656.9	2287.76	1425.46	1009.69	3098.78	18400.3	10533.2	590.25	514.568	1195.07	2214.42	1000.43	1728.63	14291.7	6848.05	6316.1
Ruminococcus obeum et rel.	66980.6	53576.3	49903.3	24560.4	71419.7	41914.1	139026	98017	166307	50834.2	53651.2	46495.4	125952	55001.8	67636.5	115010	101461	138426	51240.8	107099	86630.2	82203.5	24460.5	34607.1	48045.1	40654.4	55607.8	93387.9	101376	73965.2	93974.7	43819.9	43493.6	48323.5	68826.7	76400.8	82632.8	63666.7	125015	131752	90784.1	46394	87484.2	99295.4
Serratia	81.7662	50.8731	60.3409	64.6484	83.1266	65.0829	71.1375	69.5544	72.4114	51.4556	73.9257	128.91	60.3597	98.1009	88.245	53.3246	48.391	68.8317	139.472	256.715	206.067	57.6594	56.0614	83.898	68.9665	97.4653	55.3444	74.0116	60.5984	75.5026	47.7756	91.1691	58.2336	55.1232	45.792	43.032	82.3349	45.1281	37.1261	50.0728	39.5505	116.5	109.997	86.3261
Sporobacter termitidis et rel.	8971.49	4170.16	4038	3204.59	5864.33	18820.8	7164.17	2763.4	5558.24	10213.3	9340.35	7738.38	10759.1	6268.35	6024.14	2089.64	2177.07	2436.97	4839.54	7286.55	5683.5	32898.5	10617.7	12727.3	2559.16	3640.54	2777.58	4747.38	5151.86	9676.38	22037.6	6712.32	2764.2	2970.96	9329.93	1838.76	2440.11	3692.15	1642.67	3088.8	3442.44	14581.2	8666.06	13288.5
Staphylococcus	137.028	114.739	142.817	137.904	174.314	116.919	92.6915	106.043	138.911	96.1416	178.638	259.707	133.707	184.064	196.43	111.78	100.248	139.436	284.274	518.106	379.486	103.774	122.844	187.983	149.512	170.02	115.075	148.866	136.588	119.263	89.7748	189.831	96.2728	100.257	91.1539	90.8258	80.392	97.2169	72.3214	90.8346	76.5763	250.425	214.352	181.557
Streptococcus bovis et rel.	41305.3	9630	22890.1	1157.86	4510.83	12206.6	17459.6	5646.62	14843.2	3381.56	3258.77	3453.64	2418.32	1627.15	3162.84	9124.11	2158.67	2158.24	7535.19	4239	4888.82	4144.83	1474.61	4750.13	1762.32	4941.93	30783.7	2659.44	14864.8	2529.32	2814.66	3455.76	6275.97	9285.37	11265.3	1835.59	1813.85	1851.73	1185.86	1717.8	2792.75	10716.1	3634.84	3466.75
Streptococcus intermedius et rel.	921.811	348.251	459.981	364.077	801.811	581.975	587.621	431.156	807.66	526.335	734.085	873.434	357.022	423.568	473.681	391.873	361.247	410.9	672.88	1094.07	858.466	340.503	266.718	418.68	508.398	562.515	482.892	450.199	510.713	391.119	383.876	434.936	400.054	441.962	363.874	307.392	273.939	306.281	217.91	256.225	294.582	661.007	488.001	422.585
Streptococcus mitis et rel.	10829.8	2887.86	5559.56	805.528	3149.61	4220.42	5712.44	2398.25	5672.2	1714.27	1829.43	1700.34	1039	924.622	1506.78	3030.45	1238.67	1112.34	2805.38	2136.64	2151.58	1629.05	666.267	1817.96	931.558	1996.81	6573.67	1151.06	4254.13	1543.23	1673.81	1492.64	2557.89	3149.07	3027.41	767.357	817.462	713.425	520.438	591.208	1151.02	3797.61	1624.66	1543.59
Subdoligranulum variable at rel.	14514.8	5288.43	6059.4	14248.6	16702.4	20644.5	78658.2	23041.3	27979.9	9871.77	11179.3	10814.9	5597.95	8868.84	10985.5	11587.9	15068	20602.5	21406	13281.3	17477	40510.4	9862.55	9698.67	11385.3	8647.4	26394.3	23450.9	37650.9	24922.2	11015.1	5460.46	10129.7	11374.1	20002.1	5472.37	8203.66	6553.38	3315.9	11147.8	9769.54	13072.8	20366.9	15794.4
Sutterella wadsworthia et rel.	3434.21	879.152	1087.06	2043.02	1943.58	1051.29	1357.86	819.228	1527.23	594.637	836.863	1541.99	2042.09	1498.35	1692.41	644.762	576.536	802.6	1596.36	2891.73	2157.7	760.639	674.111	1269.32	758.012	825.558	595.245	836.408	657.083	920.824	571.145	1007.17	1049.86	1386.13	637.414	637.826	629.562	662.67	359.231	467.701	417.513	1665.5	1561.37	1422.51
Tannerella et rel.	3375.61	909.342	1565.67	773.694	1158.8	646.458	2419.89	923.613	3026.47	503.587	1073.74	1785.73	1593.38	1242.04	1211.5	977.371	1168.04	1188.94	2047.33	3032.85	2463.3	1040.61	738.191	1452.26	1231.29	1205.83	1077.49	1476.1	962.052	1177.74	1421.24	1363.25	1002.95	1843.01	1124.81	2695.17	439.8	2100.43	320.126	462.069	418.389	1319.64	1270.92	1374.94
Uncultured Bacteroidetes	159.932	73.1677	110.125	82.8613	100.162	74.2711	110.861	89.3294	165.956	125.577	128.279	190.957	81.9258	98.6028	111.291	78.4129	78.629	88.3243	233.433	338.304	290.371	72.956	68.6246	102.095	110.599	115.366	76.6836	104.986	81.028	105.167	86.1803	120.798	541.911	499.054	544.662	87.9915	47.3447	96.2078	39.3919	53.4239	46.4823	200.167	181.978	206.153
Uncultured Chroococcales	67.5491	67.4034	70.4242	64.9405	75.1204	54.205	84.8868	101.885	68.2073	45.875	70.7759	124.77	95.512	128.912	216.08	49.7557	46.2216	64.7794	138.513	247.784	191.295	50.8271	54.8659	75.7032	63.9261	80.7484	98.9986	96.274	62.7064	55.1379	41.504	84.2742	46.4133	46.8724	44.1794	41.6323	36.0655	42.866	33.3499	43.0208	35.6399	282.598	98.1404	93.4543
Uncultured Clostridiales I	7963.52	2085.62	3535.3	2895.34	3478.71	4017.55	9832.03	6620.09	12967.4	1373.56	2207.94	3724.44	1927.74	2705.77	3036.21	1526.36	1485.63	2018.66	4112.16	7549.67	5807.99	12528.6	5169.07	5598.9	2922.98	3374.66	8516.75	5831.35	5957.72	6168.69	64754.7	36331.1	6235.73	21758.6	7055.55	1394.76	1114.46	1514.52	1035.48	1324.54	2164.19	6615.6	6354.39	5132.3
Uncultured Clostridiales II	2301.84	1565.76	2085.64	2079.34	3103.1	2873.94	6984.87	1825.82	4083.63	1468.66	2288.71	3648.68	2171.89	2754.31	2792.22	1360.53	1274.66	1783.66	4402.62	6692.16	5361.09	11711.8	3924	4738.38	2696.91	4201.57	1533.17	2073.37	2388.64	3851.78	4878.63	5104.52	2720.84	3176.57	2901.58	1239.36	1245.69	1413.08	1340.76	1707.56	1559.61	4652.16	4871.81	4597.69
Uncultured Mollicutes	987.957	723.39	874.561	900.756	1113.46	780.282	3596.78	1938.26	1866.59	639.495	1042.51	1741.13	877.346	1202.56	1242.13	722.448	673.494	939.106	1927.77	3537.37	2744.63	743.021	783.029	1120.71	1014.49	1433.29	1352.29	1063.21	1232.46	809.582	680.763	1305.02	1081.63	1281.76	1264.6	609.172	529.707	634.02	517.468	660.191	754.7	1815.65	1651.89	1220.98
Uncultured Selenomonadaceae	73.8732	49.7903	55.1913	68.9568	79.2646	56.9521	42.3907	42.5062	62.6823	43.8745	70.1843	118.776	62.3405	89.8863	81.0823	49.7677	46.8688	57.9702	144.786	248.052	207.43	50.5659	55.9397	82.6161	71.1763	81.3247	51.7356	74.1447	58.8369	56.4659	41.6234	90.6108	46.5806	51.5203	44.6422	63.5717	37.3952	79.2267	42.097	62.6428	44.1168	122.689	114.359	80.9738
Veillonella	475.065	234.425	371.102	361.746	722.82	590.495	368.351	319.795	457.282	211.67	345.553	533.097	243.469	333.861	348.289	263.363	210.611	282.551	552.787	1032.08	817.55	801.843	265.896	428.967	389.245	435.671	227.78	317.471	260.592	250.676	177.247	333.873	548.946	572.611	502.104	248.905	184.028	237.431	137.309	179.481	140.951	479.987	457.207	397.414
Vibrio	349.254	235.318	279.267	266.211	350.386	242.39	235.191	229.407	278.405	192.909	338.734	505.048	286.811	356.728	402.8	223.119	213.68	329.347	583.685	1070.8	829.963	255.1	239.197	348.529	323.567	376.29	260.451	344.238	270.517	295.411	214.802	378.845	214.479	205.361	187.133	217.621	175.12	186.749	146.678	191.172	159.696	491.712	413.231	358.812
Weissella et rel.	238.902	162.74	206.602	201.876	249.106	175.877	208.773	192.609	257.009	151.058	237.511	388.731	273.773	265.441	290.183	216.919	174.042	282.741	463.302	769.483	589.399	203.627	198.153	242.739	233.369	267.09	234.305	244.399	281.357	191.473	139.012	312.199	153.37	314.188	169.386	342.262	180.904	146.083	107.975	134.697	120.028	407.319	305.543	260.278
Wissella et rel.	114.945	73.1688	69.1303	70.8688	88.6749	80.0558	90.4442	52.7004	79.7517	56.7379	83.6345	145.624	135.138	95.8806	95.9362	51.7661	47.157	65.8707	152.93	247.324	217.839	107.501	61.2947	86.9753	81.953	90.9626	92.1277	125.563	79.3587	282	66.1735	90.2988	54.5221	66.4163	120.873	128.981	44.9165	78.7481	34.9702	55.6737	69.2784	126.085	83.1616	88.88
Xanthomonadaceae	289.46	140.798	171.547	138.038	175.871	121.925	106.066	98.0519	145.285	108.553	144.633	259.97	120.932	177.869	180.425	101.116	92.4263	129.967	295.249	498.702	384.324	108.822	120.476	177.774	146.027	164.482	120.405	156.561	128.753	120.461	93.4237	181.017	99.0025	102.594	94.2936	103.769	112.236	91.5172	76.0765	97.0967	91.2648	239.973	213.991	176.132
Yersinia et rel.	277.753	234.431	274.092	279.898	351.053	235.998	167.763	196.61	255.488	181.762	305.084	508.837	253.822	356.56	395.788	197.587	191.989	265.415	580.694	1039.81	821.918	213.853	232.049	329.606	303.892	332.252	226.22	316.013	242.567	233.41	177.379	370.511	191.909	199.65	183.182	187.016	153.862	185.476	141.55	180.508	145.23	472.561	413.11	332.538
