# Supplementary material for: Faecal Metaproteomic Analysis Reveals a Personalized and Stable Functional Microbiome and Limited Effects of a Probiotic Intervention in Adults
Source: PLoS One. 2016 Apr 12;11(4):e0153294. doi: 10.1371/journal.pone.0153294 (PMC4829149; doi:10.1371/journal.pone.0153294)
Supplement: S6 Table — (XLSX) [file pone.0153294.s010.xlsx]

## Sheet: 238 TOP bacterial KOs %
KO - Description	104-1	104-2	104-3	106-1	106-2	106-3	107-1	107-2	107-3	112-1	112-2	112-3	116-1	116-2	116-3	119-1	119-2	119-3	122-1	122-2	122-3	124-1	124-2	124-3	127-1	127-2	127-3	130-1	130-2	130-3	135-1	135-2	135-3	137-1	137-2	137-3	147-1	147-2	147-3	155-1	155-2	155-3	162-1	162-2	162-3	163-1	163-2	163-3	Average
K00262 - glutamate dehydrogenase (NADP+) [EC:1.4.1.4]	8.66534	8.07656	7.31905	8.54871	7.7413	10.1776	7.29073	7.39103	7.19875	6.48106	6.66667	6.53433	7.53065	6.38468	6.80655	5.91659	5.74555	8.03738	6.93205	6.01115	5.9793	8.81792	8.99878	8.27198	7.18804	4.17537	8.35821	6.79673	7.01981	7.97546	6.42955	8.51247	8.7573	5.39384	6.65176	7.66744	6.32223	9.25553	7.54076	5.04323	7.85368	5.05226	8.36855	7.47423	7.79817	8.77585	9.07975	9.13242	7.37805
K00053 - ketol-acid reductoisomerase [EC:1.1.1.86]	5.52789	3.87488	6.34856	4.57256	4.99755	4.67735	6.75068	6.88566	5.73813	5.79644	4.81696	5.33499	6.30473	3.59138	6.39713	5.7226	4.78796	5.919	3.94647	4.14013	2.68302	2.90753	4.7426	4.98051	8.0506	9.91649	3.9403	4.65702	2.36865	2.09611	2.12038	4.55718	4.00334	5.90753	7.04304	4.57275	4.07886	4.02414	8.42391	3.53026	4.57235	5.92334	2.78952	2.83505	0.963303	2.34768	3.06748	4.2618	4.7395
K10188 - lactose/L-arabinose transport system substrate-binding protein	3.13745	3.5014	4.36717	4.57256	4.21362	4.28757	4.41044	3.66393	3.91236	5.02054	4.47013	5.00414	3.67776	4.54908	3.37769	1.84287	2.25718	2.74143	3.05422	5.29459	3.9862	4.19447	3.08066	3.50801	5.40541	4.90605	6.56716	2.07678	1.37812	2.04499	6.90834	5.50301	5.9216	4.7089	3.40973	3.60277	1.90347	0.704225	1.63043	5.83573	4.14201	5.34262	2.70499	2.87187	3.7156	3.46562	3.74233	3.88128	3.84372
K00134 - glyceraldehyde 3-phosphate dehydrogenase [EC:1.2.1.12]	4.08367	2.94118	4.32673	2.7833	4.4586	5.50022	3.24032	4.42198	3.39071	3.74258	3.50674	3.8048	3.03561	5.58659	3.73593	1.84287	3.41997	2.42991	3.46603	3.42357	2.95132	3.95615	4.90474	4.76397	3.22024	2.50522	2.92537	4.02769	3.22997	3.01636	3.21477	4.12726	3.83653	2.48288	4.86305	3.60277	2.71924	3.42052	5.43478	2.73775	4.03443	4.93612	3.93068	3.49779	2.06422	2.62717	2.26994	2.58752	3.56312
K01689 - enolase [EC:4.2.1.11]	3.23705	4.80859	3.55843	1.98807	3.67467	2.98831	2.52025	3.47442	3.54721	3.33181	4.23892	3.43259	4.26153	1.27694	2.40532	2.71581	2.59918	0.934579	3.50034	2.70701	3.02798	4.43279	3.32388	3.59463	4.42783	1.77453	4.89552	5.7898	3.5745	4.7546	2.05198	2.32158	1.91827	5.05137	4.80715	5.31178	4.55472	1.81087	4.21196	1.58501	2.74341	2.14866	1.81741	2.57732	2.79817	4.86305	4.78528	3.27245	3.32141
K02027 multiple sugar transport system substrate-binding protein	3.58566	3.31466	3.23494	3.44599	3.57668	2.68515	2.79028	2.46368	2.08659	3.01232	3.12139	3.30852	3.3275	3.43176	3.32651	5.14064	2.25718	3.80062	2.71105	2.98567	2.79801	2.04957	2.10782	2.03551	2.47269	4.07098	2.44776	2.95784	2.23945	1.68712	3.07798	3.09544	2.9191	3.51027	3.07434	2.90993	3.33107	1.71026	1.90217	1.80115	2.0979	2.84553	2.40913	2.90869	4.08257	2.57127	2.76074	3.50076	2.89545
K00831 - phosphoserine aminotransferase [EC:2.6.1.52]	3.08765	2.14753	2.91144	1.32538	2.98873	2.77176	3.78038	3.47442	3.49504	2.3277	2.23507	2.02647	2.27671	2.15483	1.99591	2.71581	3.48837	2.67913	1.81881	2.30892	2.22307	2.38322	2.47264	1.55912	2.41518	3.34029	2.56716	2.7061	1.80879	1.99387	3.28317	3.61135	3.83653	1.88356	2.29178	2.72517	2.37933	3.72233	2.98913	1.72911	2.0979	2.14866	1.43702	2.02504	1.92661	2.0123	2.26994	3.04414	2.5186
K01810 - glucose-6-phosphate isomerase [EC:5.3.1.9]	2.24104	2.61438	2.34533	2.58449	1.91083	1.73235	1.89019	2.27416	2.08659	2.73848	2.73603	2.52275	2.33508	1.99521	1.89355	2.71581	1.29959	3.4891	2.53946	2.2293	2.68302	2.1449	2.71585	2.59853	2.99022	1.77453	2.74627	1.88798	2.67011	2.81186	1.64159	1.46174	1.50125	2.73973	2.06819	2.40185	1.97145	1.50905	1.49457	2.16138	2.20549	1.16144	3.12764	2.5405	3.16514	3.07434	3.12883	2.81583	2.32015
K01818 - L-fucose isomerase [EC:5.3.1.25]	1.94223	2.52101	1.73878	2.65076	1.76384	1.60243	2.07021	1.89514	2.39958	1.5518	1.57996	1.36476	1.98482	2.8731	2.35415	3.49176	2.46238	2.92835	2.05903	2.30892	2.18475	2.43089	2.39157	1.55912	1.89764	2.50522	1.73134	2.13971	1.63652	1.58487	2.32558	2.49355	2.41868	1.62671	1.9005	2.07852	2.17539	2.41449	2.37772	3.17003	2.0979	2.32288	2.28233	2.31959	2.75229	2.40358	1.90184	2.89193	2.19913
K02035 peptide/nickel transport system substrate-binding protein	2.19124	2.47432	2.22402	4.5063	2.49878	3.24816	2.79028	2.14782	1.40845	3.14925	2.8131	2.97767	1.34267	1.83559	2.55885	1.74588	1.77839	1.86916	1.6129	2.10987	2.22307	1.62059	1.66194	1.68904	1.49511	3.23591	2.20896	2.95784	2.02412	1.43149	2.05198	2.06363	1.41785	2.39726	2.12409	2.03233	2.8552	1.71026	2.03804	2.44957	1.93653	3.13589	1.43702	1.28866	1.6055	1.9005	1.41104	1.82648	2.15651
K01804 - L-arabinose isomerase [EC:5.3.1.4]	1.79283	2.10084	1.57703	2.91584	2.30279	1.77566	2.61026	2.46368	2.50391	1.78001	1.77264	1.40612	2.21833	2.23464	2.66121	1.64888	1.09439	1.49533	1.44132	1.63217	1.64814	1.81125	1.78354	1.64573	1.95515	3.23591	1.91045	3.4613	2.54091	2.45399	2.46238	2.40757	3.25271	1.96918	1.56512	1.84758	2.17539	3.21932	1.49457	2.88184	2.52824	2.78746	1.73288	2.90869	2.61468	1.73281	2.26994	1.52207	2.15097
K00626 - acetyl-CoA C-acetyltransferase [EC:2.3.1.9]	1.79283	1.63399	1.81965	1.52419	2.69476	2.64184	1.35014	1.26342	2.13876	1.59744	1.69557	2.48139	1.69294	0.638468	0.921187	1.84287	2.32558	2.3053	2.02471	1.87102	1.60981	3.05052	2.51317	3.07492	1.95515	1.56576	2.32836	2.20264	2.36865	2.70961	2.46238	2.32158	3.0025	2.31164	1.73281	1.52425	3.60299	2.8169	2.37772	1.00865	1.34481	1.21951	3.04311	3.01915	3.99083	2.45947	1.53374	2.35921	2.12012
K01610 - phosphoenolpyruvate carboxykinase (ATP) [EC:4.1.1.49]	1.24502	1.40056	1.45572	0.662691	0.832925	1.16934	1.17012	1.26342	1.09546	1.18667	1.31021	1.48883	0.758903	0.319234	0.972364	1.26091	1.43639	1.68224	2.91695	1.27389	2.64469	3.33651	2.63478	3.11823	1.26509	1.14823	1.55224	1.32159	4.39276	3.93661	2.53078	2.66552	1.33445	5.13699	3.57742	3.32564	1.56356	1.20724	1.15489	1.08069	1.23722	0.929152	3.08538	2.90869	3.34862	3.18614	2.63804	2.43531	1.94996
K01812 - glucuronate isomerase [EC:5.3.1.12]	1.54382	1.9141	1.45572	0.530152	1.66585	1.9489	1.17012	1.3266	1.30412	1.64309	1.50289	1.36476	1.2843	2.63368	1.3306	1.16392	2.05198	1.93146	1.09815	1.31369	1.18819	2.19256	2.39157	1.77566	1.03508	1.67015	1.61194	1.25865	1.16279	1.53374	2.66758	2.14961	3.0025	0.342466	1.34153	0.969977	2.03943	2.41449	0.883152	3.02594	2.20549	2.03252	1.18343	1.62003	1.78899	2.0123	1.10429	0.913242	1.61865
K01834 - 2,3-bisphosphoglycerate-dependent phosphoglycerate mutase	1.04582	1.30719	1.13223	1.32538	1.0779	0.866176	2.16022	1.57928	1.51278	1.41488	1.38728	1.11663	0.992411	1.19713	1.58649	1.55189	1.64159	1.68224	1.16678	1.15446	1.14987	1.81125	1.13498	0.866176	1.03508	2.08768	2.20896	1.76211	1.72265	1.17587	1.84679	1.37575	1.33445	1.62671	1.28563	1.15473	1.69952	1.50905	1.69837	1.72911	1.34481	1.56794	0.929839	1.03093	1.19266	1.67691	1.28834	1.29376	1.40497
K00656 - formate C-acetyltransferase [EC:2.3.1.54]	1.14542	1.5873	1.65791	0.198807	1.66585	0.996102	1.44014	1.51611	1.35629	0.867184	1.54143	1.03391	1.51781	0.319234	1.43296	1.26091	0.683995	1.30841	1.06383	1.15446	0.68992	2.24023	2.4321	1.60243	1.49511	1.46138	2.26866	1.38452	1.89492	1.68712	1.23119	1.89166	1.33445	1.45548	1.73281	2.26328	0.815772	1.20724	1.5625	0.576369	1.72136	0.987224	0.549451	0.994109	1.05505	1.67691	1.47239	2.43531	1.37223
K10439 - ribose transport system substrate-binding protein	2.34064	1.21382	1.65791	1.723	1.71485	0.909485	1.53015	0.694883	1.82577	1.14103	1.19461	1.36476	1.34267	2.31445	1.53531	2.52182	1.77839	1.49533	0.754976	1.07484	1.03488	1.19161	0.770166	0.996102	1.55262	2.19207	0.895522	2.13971	1.11972	1.02249	1.70999	1.20378	1.25104	1.11301	0.950252	0.877598	1.4276	1.00604	1.7663	1.65706	0.591716	1.4518	0.760778	0.883652	1.55963	0.78256	0.736196	1.14155	1.33154
K00826 - branched-chain amino acid aminotransferase [EC:2.6.1.42]	3.43625	1.49393	3.07319	2.38569	1.46987	2.07882	2.34023	1.83196	2.03443	1.41488	1.65703	1.81969	1.34267	1.51636	1.53531	1.4549	1.23119	1.49533	0.857927	1.67197	0.881564	0.571973	0.526956	0.606323	2.07016	2.40084	1.07463	1.63625	0.602929	0.766871	1.23119	0.601892	0.250209	1.45548	1.62102	1.33949	0.815772	0.503018	0.883152	1.36888	0.91447	0.987224	0.549451	0.62592	0.229358	0.503074	0.613497	1.21766	1.31231
K01805 - xylose isomerase [EC:5.3.1.5]	1.34462	1.21382	1.29397	2.65076	1.76384	2.20875	1.35014	1.45294	1.82577	1.3236	1.23314	0.992556	0.992411	1.43655	1.27943	0.193986	0.341997	0.311526	1.02951	1.23408	1.34151	1.62059	1.58087	0.952793	0.40253	0.417537	0.597015	1.38452	0.645995	1.07362	0.0683995	0.257954	0.0834028	1.28425	1.62102	1.98614	1.76751	2.21328	1.63043	1.15274	1.50619	1.74216	1.81741	2.20913	2.70642	1.56512	1.77914	1.06545	1.29055
K09157 hypothetical protein	1.54382	0.840336	1.33441	1.25911	0.685938	0.909485	1.62016	1.57928	1.61711	1.3236	0.963391	1.03391	1.51781	1.27694	1.48414	1.74588	1.29959	1.24611	0.857927	1.19427	0.804906	0.42898	1.05391	0.952793	1.61012	2.19207	0.955224	1.25865	0.81826	0.715746	0.615595	1.1178	1.83486	1.45548	1.39743	1.24711	1.0877	1.40845	1.5625	0.936599	1.07585	1.39373	0.929839	0.810015	0.504587	0.670766	0.674847	0.761035	1.1585
K00248 - butyryl-CoA dehydrogenase [EC:1.3.8.1]	1.74303	0.933707	1.69834	0.861498	0.881921	1.51581	0.720072	0.442198	1.14763	0.547695	0.847784	1.57155	0.81728	0.478851	0.511771	0.581959	1.50479	0.560748	1.02951	1.47293	0.728248	1.76358	0.972842	1.81897	1.26509	0.626305	1.43284	0.755192	1.24892	1.73824	0.889193	1.1178	0.750626	2.14041	1.34153	0.600462	1.4276	1.81087	1.90217	0.0720461	0.430339	0.116144	1.2257	1.73049	1.97248	1.67691	1.96319	1.67428	1.14712
K03737 - putative pyruvate-flavodoxin oxidoreductase [EC:1.2.7.-]	0.199203	0.887021	0.404367	0.265076	0.783929	0.649632	0.090009	0.50537	0.521648	0.912825	0.655106	0.661704	0.758903	0.638468	0.665302	0.387973	1.77839	0.685358	1.33837	0.995223	1.34151	0.762631	0.283745	0.822867	0.747556	0.417537	1.19403	1.76211	2.79931	4.29448	3.55677	0.343938	1.00083	0.342466	0.838457	0.508083	1.56356	1.10664	1.08696	1.15274	0.484131	1.4518	2.49366	2.87187	1.92661	1.62102	1.10429	1.29376	1.10328
K00198 - carbon-monoxide dehydrogenase catalytic subunit [EC:1.2.99.2]	0.996016	1.07376	0.930044	0.596421	1.22489	1.12603	1.44014	1.07391	0.991132	1.09539	1.079	0.992556	1.63456	1.03751	1.63767	1.16392	1.84679	1.61994	0.995196	1.19427	0.958222	0.905624	1.33766	0.779558	0.747556	1.25261	1.31343	0.629327	0.732127	0.766871	0.957592	1.46174	1.00083	1.0274	1.17384	0.969977	1.01971	1.50905	1.3587	0.720461	1.29102	0.987224	0.591716	0.95729	1.05505	0.894354	1.10429	1.29376	1.09471
K01269 aminopeptidase [EC:3.4.11.-]	0.796813	1.49393	0.646987	0.994036	0.685938	0.909485	1.80018	1.01074	1.0433	1.82565	1.6185	1.40612	0.758903	1.35674	0.665302	0.969932	1.09439	0.872274	0.652025	0.597134	0.766577	1.09628	1.21605	0.952793	0.80506	0.835073	0.776119	1.19572	0.861326	1.07362	1.57319	1.28977	1.33445	0.599315	0.726663	0.831409	0.951734	1.40845	0.883152	0.504323	1.66756	1.50987	1.05664	0.883652	1.83486	0.838457	0.981595	0.608828	1.0471
K02058 simple sugar transport system substrate-binding protein	0.796813	0.793651	0.808734	1.65673	1.71485	0.649632	1.17012	0.442198	0.991132	0.867184	0.732177	0.785773	0.758903	2.07502	0.767656	2.42483	1.36799	1.37072	0.754976	0.716561	0.843235	0.762631	0.648561	0.736249	0.632547	0.730689	0.298507	1.13279	1.03359	0.817996	0.889193	0.773861	0.417014	1.5411	0.894354	0.969977	0.611829	0.503018	0.543478	1.29683	0.484131	0.987224	1.26796	1.1782	1.14679	0.78256	0.981595	1.21766	0.953525
K00100 - [EC:1.1.1.-]	0.498008	1.02708	0.687424	0.994036	1.1269	0.563014	0.810081	1.07391	1.09546	0.912825	0.809249	1.11663	1.05079	0.798085	0.87001	0.678952	0.683995	0.996885	1.09815	1.03503	1.68647	1.81125	1.4998	1.64573	1.09258	0.626305	0.895522	0.629327	0.861326	1.22699	0.820793	0.257954	0.667223	0.171233	0.838457	1.20092	1.01971	0.603622	0.407609	1.00865	0.537924	0.522648	0.972105	1.39912	1.14679	1.00615	0.552147	0.913242	0.915585
K00874 - 2-dehydro-3-deoxygluconokinase [EC:2.7.1.45]	1.04582	0.793651	0.930044	1.12657	0.979912	0.866176	0.630063	0.758054	0.782473	0.593336	0.539499	0.868486	1.16754	0.877893	0.460594	0.872939	0.752394	1.1215	1.09815	1.27389	1.03488	0.476644	1.01338	1.25595	1.03508	2.08768	0.41791	0.692259	0.47373	0.511247	0.410397	1.03181	0.917431	1.45548	1.39743	1.15473	0.951734	0.201207	0.339674	1.80115	0.806885	1.33566	1.31023	0.699558	0.59633	0.614869	0.184049	0.456621	0.879229
K01738 - cysteine synthase A [EC:2.5.1.47]	1.09562	0.280112	1.37485	2.18688	0.195982	0.822867	0.990099	1.95831	1.25196	1.14103	0.462428	0.744417	0.642148	0.638468	1.02354	1.55189	0.547196	0.872274	0.171585	0.477707	0.306631	0.0476644	1.37819	1.81897	1.89764	1.14823	0.119403	0	0	0.0511247	0	0.94583	0.834028	3.25342	2.12409	1.84758	0.203943	0	0.951087	1.58501	1.93653	1.10337	1.18343	0.0736377	0	0.0558971	0.245399	0.0761035	0.867012
K10540 - methyl-galactoside transport system substrate-binding protein	1.49402	0.887021	1.2131	1.52419	1.17589	0.606323	1.53015	0.631712	0.521648	0.821543	0.809249	1.07527	1.51781	1.11732	0.87001	1.84287	1.70999	1.43302	0.686342	0.915605	0.881564	0.238322	0.364816	0.389779	0.517539	1.56576	0.41791	1.19572	0.861326	0.664622	0.547196	0.515907	0.417014	0.941781	0.950252	0.508083	0.543848	0.503018	0.407609	1.36888	0.806885	0.696864	0.972105	0.846834	0.504587	0.558971	0.245399	0.532725	0.861425
K07335 basic membrane protein A and related proteins	0.747012	0.653595	0.768298	0.994036	0.538951	0.476397	1.35014	0.947568	0.730308	1.00411	0.693642	0.992556	0.525394	0.718276	0.562948	1.3579	1.29959	1.1838	0.720659	0.875796	1.03488	0.619638	0.324281	0.563014	0.40253	0.626305	0.955224	0.566394	0.387597	0.408998	0.820793	1.46174	1.33445	0.599315	0.726663	0.923788	0.815772	1.00604	0.815217	1.08069	0.860678	0.696864	0.845309	0.773196	0.458716	0.726663	0.552147	0.913242	0.800856
K01270 - dipeptidase D [EC:3.4.13.-]	0.59761	0.70028	0.646987	0.397614	0.930916	0.563014	0.450045	1.20025	0.678143	0.867184	0.809249	0.661704	0.758903	0.638468	0.87001	0.387973	1.02599	0.934579	0.617708	0.915605	1.22652	0.85796	0.445886	0.476397	0.690052	0.730689	0.537313	1.06986	1.42119	1.02249	1.09439	0.257954	0.250209	0.256849	0.447177	0.554273	1.0877	0.402414	0.475543	1.22478	1.23722	2.14866	0.633981	0.662739	0.87156	0.614869	0.429448	0.228311	0.750181
K00145 - N-acetyl-gamma-glutamyl-phosphate reductase [EC:1.2.1.38]	0.59761	0.887021	0.646987	0.596421	0.636943	0.476397	0.360036	0.758054	0.782473	0.73026	0.655106	0.661704	0.642148	0.239425	0.818833	0.678952	0.889193	1.1215	1.09815	0.995223	0.766577	0.524309	0.567491	0.606323	1.15009	0.835073	1.07463	0.818125	0.81826	0.408998	0.136799	0.859845	0.417014	1.11301	0.950252	0.646651	0.747791	0.402414	0.747283	0.360231	1.07585	0.87108	1.31023	0.95729	0.825688	0.670766	0.613497	0.761035	0.735605
K01740 - O-acetylhomoserine (thiol)-lyase [EC:2.5.1.49]	0.199203	1.54062	0.889608	2.65076	0.489956	0.563014	0.540054	0.315856	0.208659	0.319489	0.462428	0.330852	1.10917	0.798085	0.511771	0.29098	0.205198	0.498442	0.343171	0.437898	0.574933	1.23928	0.608026	0.519706	2.35768	0.730689	1.31343	1.00692	0.559862	0.817996	0.889193	0.429923	0.166806	1.88356	1.17384	0.600462	0.67981	0.301811	0.475543	1.72911	0.215169	0.232288	0.380389	0.883652	0.550459	0.279486	0.429448	0.761035	0.718661
K13922 - propionaldehyde dehydrogenase	0.697211	0.653595	0.566114	0.795229	0.979912	0.822867	0.810081	0.947568	1.35629	0.867184	0.809249	0.578991	0.758903	1.11732	1.02354	1.64888	0.615595	0.809969	0.617708	0.597134	0.574933	0.667302	0.689096	0.519706	0.632547	0.730689	0.358209	0.629327	0.344531	0.357873	1.36799	0.94583	1.58465	0.0856164	0.335383	0.646651	0.475867	0.905433	0.679348	0.936599	0.484131	0.638792	0.126796	0.33137	0.458716	0.614869	0.858896	0.380518	0.717396
K00244 - fumarate reductase flavoprotein subunit [EC:1.3.99.1]	0.747012	1.12045	0.727861	0.994036	0.881921	0.779558	0.990099	0.758054	0.678143	0.36513	0.346821	0.454921	0.642148	2.23464	0.716479	0.484966	0.410397	0.498442	0.411805	0.437898	0.536604	0.810296	0.932306	0.952793	0.40253	0.730689	0.537313	0.755192	0.516796	0.613497	0.615595	1.71969	1.00083	0.513699	0.447177	0.461894	0.67981	0.704225	0.475543	0.360231	1.02205	0.813008	0.718512	0.589102	0.550459	0.670766	0.368098	0.380518	0.699167
K01193 - beta-fructofuranosidase [EC:3.2.1.26]	0.249004	0.70028	0.727861	1.25911	1.22489	0.692941	0.450045	0.50537	0.365154	0.912825	0.655106	0.992556	1.05079	0.319234	0.818833	0.581959	0.547196	0.809969	0.960879	1.07484	0.766577	0.714967	0.567491	0.606323	0.172513	0.208768	0.238806	0.94399	0.645995	0.766871	0.478796	0.859845	0.750626	0.770548	0.558971	0.877598	0.543848	0.503018	0.407609	0.504323	0.484131	0.522648	0.295858	0.405007	1.10092	0.39128	1.04294	0.684932	0.660709
K01785 - aldose 1-epimerase [EC:5.1.3.3]	0.697211	0.653595	0.606551	0.463883	0.636943	0.34647	0.540054	0.379027	0.521648	0.821543	0.963391	1.03391	0.758903	0.558659	0.460594	1.06693	0.889193	1.05919	0.720659	0.915605	0.68992	0.190658	0.121605	0.259853	0.517539	0.626305	0.597015	1.25865	0.904393	0.817996	1.09439	1.03181	1.25104	0.342466	0.447177	0.692841	0.339905	0.301811	0.203804	1.08069	0.699301	0.58072	0.338123	0.478645	0.917431	0.39128	0.552147	0.761035	0.657969
K01209 - alpha-N-arabinofuranosidase [EC:3.2.1.55]	0.498008	0.980392	0.525677	0.662691	0.832925	0.649632	0.540054	0.50537	0.365154	1.09539	0.963391	1.03391	0.467017	0.239425	0.716479	0.581959	1.23119	0.373832	0.720659	0.716561	0.881564	0.571973	0.608026	0.736249	0.460035	0.521921	0.358209	0.377596	0.47373	0.306748	0.547196	0.257954	0.333611	0.684932	0.503074	0.785219	0.815772	0.201207	0.747283	1.22478	1.29102	1.27758	0.46492	1.14138	1.00917	0.111794	0.245399	0.456621	0.647806
K02406 - flagellin	0.199203	0.140056	0.36393	0.927767	0.489956	0.952793	0.270027	0.694883	0.521648	0.0912825	0.192678	0.454921	0.525394	0.159617	0.204708	0.387973	0.136799	0.186916	0.583391	1.31369	1.11154	0.762631	1.21605	1.29926	0.460035	0.835073	0.41791	0.188798	0.301464	0.511247	1.36799	1.54772	1.83486	1.71233	1.06205	0.785219	0.475867	0.402414	0.271739	0.0720461	0.0537924	0.58072	0.633981	1.14138	0.642202	0.670766	0.613497	0.761035	0.636068
K01176 - alpha-amylase [EC:3.2.1.1]	1.19522	1.30719	1.2131	1.12657	1.02891	0.779558	0	0	0	1.27796	1.079	0.82713	1.57618	2.15483	1.53531	0	0	0	0.0343171	0	0.0383289	2.47855	1.45926	1.42919	0	0	0	0.251731	0.129199	0.0511247	0	0	0	0	0	1.01617	1.83549	1.81087	1.15489	0	0.0537924	0.058072	0.0422654	0.0368189	0.0458716	1.00615	1.47239	0.837139	0.632137
K07469 aldehyde oxidoreductase	0.498008	0.746965	0.525677	0.397614	0.391965	0.649632	1.08011	0.884397	1.19979	0.638978	0.655106	0.372208	0.583771	0.638468	0.972364	0.872939	0.547196	1.68224	0.686342	0.557325	0.498275	0.476644	0.324281	0.303162	0.40253	0.313152	0.41791	0.440529	0.258398	0.255624	0.615595	0.687876	0.917431	0.171233	0.223589	0.508083	0.475867	1.60966	0.747283	0.648415	0.753093	0.174216	0.676247	0.773196	0.825688	0.670766	0.674847	0.684932	0.627284
K01813 - L-rhamnose isomerase [EC:5.3.1.14]	0.747012	0.933707	0.566114	0.132538	0.783929	0.563014	0.450045	0.631712	0.573813	0.456413	0.732177	0.496278	0.467017	0.319234	0.35824	0.0969932	0.0683995	0	0.480439	0.636943	0.498275	0.85796	0.648561	0.649632	0.747556	0.730689	0.955224	1.06986	1.16279	0.869121	0.957592	0.601892	0.667223	0.342466	0.670766	0.461894	0.951734	1.10664	0.883152	1.00865	0.806885	0.987224	0.338123	0.294551	0.366972	0.78256	0.552147	0.456621	0.623349
K00925 - acetate kinase [EC:2.7.2.1]	0.64741	0.326797	0.485241	0.0662691	0.538951	0.606323	0.090009	0.50537	0.417319	0.502054	0.732177	0.909843	0.350263	0	0.102354	0.678952	1.29959	0.809969	0.926561	0.597134	0.421617	0.667302	0.851236	0.822867	0.460035	0.417537	0.597015	0.755192	0.689061	1.32924	0.136799	1.28977	0.58382	0.599315	0.726663	0.461894	0.475867	0.503018	0.611413	0.0720461	0.537924	0.232288	0.887574	0.589102	1.14679	1.17384	1.04294	0.456621	0.606904
K10200 - N-acetylglucosamine transport system substrate-binding protein	0.946215	0.466853	0.24262	0.72896	0.538951	0.259853	0.450045	0.126342	0.417319	0.547695	0.61657	0.620347	0.350263	0.957702	0.511771	0.581959	0.820793	0.560748	0.686342	0.835987	0.919893	0.42898	0.364816	0.389779	0.0575043	0.208768	0.119403	0.314663	0.301464	0.357873	1.23119	1.46174	1.25104	0.684932	0.447177	0.323326	1.15568	0.402414	0.339674	0.792507	0.645508	0.638792	1.01437	0.405007	0.917431	0.894354	0.674847	0.684932	0.597821
K00812 - aspartate aminotransferase [EC:2.6.1.1]	0.64741	0.466853	0.525677	0	0.0489956	0.129926	0.540054	0.947568	0.521648	0.319489	0.61657	0.537634	0.0583771	0.798085	0.0511771	0.0969932	0.205198	0.0623053	0.926561	0.875796	0.843235	0.142993	0.486421	0.0866176	1.15009	1.25261	1.55224	0.503461	0.47373	0.306748	0.341997	0.0859845	0.0834028	0.256849	0.39128	0.415704	1.15568	1.81087	1.3587	0.792507	1.18343	1.10337	0.380389	0.220913	0.137615	1.45333	1.10429	0.456621	0.581404
K01687 - dihydroxy-acid dehydratase [EC:4.2.1.9]	0.547809	0.513539	0.646987	0.463883	0.146987	0.259853	0.90009	0.631712	0.782473	0.547695	0.500963	0.496278	0.81728	0.638468	0.562948	0.969932	0.205198	0.373832	0.652025	0.517516	0.651591	0.42898	0.526956	0.476397	0.40253	0.521921	0.656716	0.566394	0.559862	0.306748	1.43639	0.429923	0.58382	0.684932	0.335383	0.277136	0.271924	0.201207	0.339674	0.144092	0.484131	0.406504	0.845309	0.846834	0.825688	0.447177	0.552147	0.456621	0.538384
K00133 - aspartate-semialdehyde dehydrogenase [EC:1.2.1.11]	0.348606	0.280112	0.323494	0	0.293974	0.563014	0.270027	0.631712	0.312989	0.319489	0.462428	0.372208	0.233508	0.877893	0.460594	0.0969932	0.136799	0.186916	0.652025	0.35828	0.651591	1.14395	0.729631	0.649632	0.460035	0.104384	0.835821	0.440529	0.990525	1.12474	1.16279	1.20378	1.00083	0.171233	0.39128	0.323326	0.747791	0.402414	0.543478	0	0.645508	0.638792	0.972105	0.736377	0.825688	0.670766	0.368098	0.380518	0.531181
K01699 - propanediol dehydratase large subunit [EC:4.2.1.28]	0.796813	0.70028	0.727861	1.25911	0.685938	1.08272	0.450045	0.50537	0.678143	0.73026	0.231214	0.661704	0.81728	0.478851	0.921187	0.193986	0	0.249221	0.377488	0.318471	0.68992	0.571973	0.445886	0.216544	0.287522	0.626305	0.119403	0.566394	0.258398	0.460123	0.889193	0.515907	0.58382	0.256849	0.335383	0.277136	0.543848	0.402414	0.679348	0.504323	0.322754	0.638792	0.507185	0.589102	0.779817	0.335383	0.306748	0.380518	0.519936
K01041 - [EC:2.8.3.-]	0.348606	0.420168	0.566114	0.0662691	0.489956	0.476397	0.450045	0.50537	0.886802	0.0912825	0.500963	0.372208	0.350263	0.877893	0.409417	1.26091	1.77839	0.685358	0.82361	0.796178	0.99655	0.381316	0.202675	0.34647	0.40253	0.835073	0.716418	0.125865	0.172265	0.0511247	0.273598	0.171969	0.166806	0	0.111794	0.323326	0.543848	0.503018	0.339674	1.51297	1.02205	0.987224	0.338123	0.515464	0.321101	0.670766	0.306748	0.152207	0.513483
K00625 - phosphate acetyltransferase [EC:2.3.1.8]	0.448207	0.653595	0.444804	0.0662691	0.44096	0.476397	0.090009	0.189514	0.260824	0.273848	0.423892	0.372208	0.467017	0.0798085	0.35824	0.0969932	0.341997	0.623053	0.686342	0.477707	0.498275	0.524309	0.608026	0.736249	0.920069	0	0.597015	0.314663	0.775194	0.613497	0.547196	0.773861	0.750626	1.11301	0.894354	0.692841	0.475867	0.201207	0.543478	0.216138	0.322754	0.29036	1.2257	0.699558	0.642202	0.726663	0.674847	0.761035	0.508556
K05878 - dihydroxyacetone kinase	0.747012	0.420168	0.525677	0.530152	0.538951	0.822867	0.180018	0.821226	0.573813	0.410771	0.423892	0.413565	0.642148	0.239425	0.614125	1.06693	0.889193	0.623053	0.549073	0.477707	0.459946	0.381316	0.608026	0.476397	0.40253	0.417537	0.358209	0.629327	0.387597	0.562372	0.547196	0.515907	0.417014	0.0856164	0.167691	0.323326	0.339905	0.301811	0.407609	0.288184	0.322754	0.58072	0.549451	0.736377	0.550459	0.558971	0.490798	0.532725	0.498115
K02190 - sirohydrochlorin cobaltochelatase [EC:4.99.1.3]	0.448207	0.373483	0.283057	0.72896	0.293974	0.173235	0.450045	0.252685	0.469484	0.36513	0.462428	0.413565	0.758903	0.638468	0.511771	0.872939	0.752394	1.05919	0.720659	0.477707	0.68992	0.142993	0.0810701	0.303162	0.287522	0.313152	0.477612	0.314663	0.344531	0.408998	0.136799	0.0859845	0.166806	0.428082	0.223589	0.554273	0.407886	0.100604	0.203804	0.864553	0.860678	0.522648	0.507185	0.405007	0.366972	0.894354	0.981595	1.06545	0.471795
K00615 - transketolase [EC:2.2.1.1]	0.249004	0.233427	0.485241	0.861498	0.685938	0.173235	0.270027	0.568541	0.625978	0.684619	0.231214	0.413565	0.583771	0.239425	0.818833	0.193986	0.410397	0.0623053	0.411805	0.398089	0.383289	0.381316	0.689096	0.692941	0.172513	0	0.0597015	0.566394	1.07666	0.766871	0	0	0.166806	0.599315	0.78256	1.33949	0.407886	0.100604	0.271739	0.576369	0.699301	0.87108	0.633981	0.62592	0.733945	0.167691	0.858896	0.380518	0.470954
K01938 - formate--tetrahydrofolate ligase [EC:6.3.4.3]	0	0.186741	0.161747	0	0.195982	0.606323	0.090009	0.0631712	0.156495	0.73026	0.61657	0.661704	0.40864	0.0798085	0.35824	0.484966	1.16279	0.436137	0.960879	0.398089	0.651591	0.476644	0.608026	0.779558	0.40253	0.104384	0.895522	0.188798	0.344531	0.715746	0.410397	0.859845	0.834028	0.599315	0.335383	0.369515	0.135962	0.704225	0.747283	0.0720461	0.107585	0.116144	1.0989	0.662739	0.733945	0.726663	0.122699	0.228311	0.453976
K00854 - xylulokinase [EC:2.7.1.17]	0.64741	0.420168	0.24262	0.463883	0.685938	0.389779	0.630063	0.252685	0.312989	0.547695	0.500963	0.620347	0.642148	0.319234	0.87001	0.387973	0.683995	0.623053	0.480439	0.437898	0.574933	0.476644	0.405351	0.34647	0.345026	0.626305	0.597015	0.440529	0.387597	0.255624	0.341997	0.257954	0.333611	0.513699	0.223589	0.508083	0.339905	0	0.13587	0.288184	0.645508	0.406504	0.507185	0.736377	0.779817	0.223589	0.429448	0.456621	0.452973
K01636 Aldehyde-lyases	0.149402	0.233427	0.525677	0.795229	0.587947	0.433088	0.810081	0.568541	0.991132	0.410771	0.346821	0.330852	0.291886	0.638468	0.614125	0.387973	0	0.623053	0.0343171	0.0398089	0	0.905624	0.608026	0.563014	0.287522	0.417537	0.179104	0.503461	0.559862	0.664622	0	0	0.0834028	0.513699	0.670766	0.184758	0.271924	0.100604	0.271739	0.432277	0.322754	0.174216	0.46492	0.846834	0.825688	0.279486	1.04294	0.761035	0.432259
K01206 - alpha-L-fucosidase [EC:3.2.1.51]	0.59761	0.373483	0.24262	0.198807	0.44096	0.216544	0.270027	0.379027	0.417319	0.36513	0.500963	0.289495	0.233508	0.399042	0.204708	0.484966	0.615595	0.560748	0.480439	0.35828	0.498275	0.190658	0.324281	0.259853	0.230017	0.313152	0.298507	0.440529	0.129199	0.255624	0	0.171969	0	0.513699	0.670766	0.461894	0.543848	1.20724	1.01902	1.65706	0.91447	0.638792	0.380389	0.147275	0.0458716	0.503074	0.736196	0.380518	0.428364
K01187 - alpha-glucosidase [EC:3.2.1.20]	0.0996016	0.560224	0.0808734	0.198807	0.195982	0.259853	0.450045	0.884397	0.991132	0.593336	0.770713	0.454921	0.934034	0.399042	0.716479	0.678952	1.09439	1.1215	0.82361	0.676752	0.613262	0.333651	0.16214	0.303162	0.287522	0.104384	0.358209	0.314663	0.172265	0.153374	0.341997	0.0859845	0.250209	0.0856164	0.0558971	0.0923788	0.339905	0.100604	0.0679348	0.576369	0.699301	0.58072	0.380389	0.33137	0.366972	0.111794	0.245399	0.152207	0.409423
K01915 - glutamine synthetase [EC:6.3.1.2]	0.249004	0.326797	0.283057	1.25911	0.930916	0.779558	0.540054	0.315856	0.365154	0.593336	0.423892	0.413565	0.350263	0.159617	0.460594	0.0969932	0	0.0623053	0.754976	0.35828	0.383289	0.667302	0.526956	0.476397	0	0	0	0.818125	0.516796	0.408998	0.205198	0	0.166806	0.513699	0.726663	0.508083	0.203943	0.201207	0.13587	0.432277	0.215169	0.406504	0.380389	0.699558	0.59633	0.39128	0.797546	0.380518	0.40588
K13889 - glutathione transport system substrate-binding protein	0.199203	0.513539	0.444804	0.530152	0.391965	0.259853	0.360036	0.379027	0.260824	0.502054	0.385356	0.372208	0.642148	0.239425	0.614125	0.484966	0.547196	0.560748	0.377488	0.35828	0.229973	0.238322	0.364816	0.259853	0.345026	0.626305	0.298507	0.314663	0.344531	0.408998	0.478796	0.257954	0.333611	0.342466	0.335383	0.323326	0.407886	0.301811	0.13587	0.504323	0.322754	0.406504	0.338123	0.368189	0.366972	0.447177	0.797546	0.532725	0.392829
K01188 - beta-glucosidase [EC:3.2.1.21]	0.199203	0.420168	0.606551	0.397614	0.293974	0.259853	0.630063	0.379027	0.573813	0.456413	0.346821	0.248139	0.467017	0.399042	0.921187	1.06693	0.615595	0.436137	0.377488	0.35828	0.383289	0.42898	0.608026	0.34647	0.460035	0.626305	0.597015	0.377596	0.258398	0.153374	0.410397	0.343938	0.166806	0.0856164	0.111794	0.184758	0.203943	0.301811	0.13587	0.432277	0.268962	0.522648	0.126796	0.294551	0.275229	0.223589	0.490798	0.304414	0.387021
K01443 - N-acetylglucosamine-6-phosphate deacetylase [EC:3.5.1.25]	0.298805	0.326797	0.36393	0.463883	0.0979912	0.34647	0.450045	0.252685	0.208659	0.410771	0.578035	0.620347	0.233508	0.0798085	0.460594	0.387973	0.273598	0.311526	0.754976	0.716561	0.804906	0.381316	0.324281	0.519706	0.287522	0.104384	0.179104	0.566394	0.775194	0.613497	0.273598	0.343938	0.667223	0.171233	0.558971	0.230947	0.543848	0	0.13587	0.288184	0.268962	0.348432	0.422654	0.294551	0.642202	0.335383	0.429448	0.380518	0.386026
K01182 - oligo-1,6-glucosidase [EC:3.2.1.10]	0.149402	0.326797	0.0808734	0.530152	0.489956	0.259853	0.810081	0.252685	0.417319	0.73026	0.809249	0.785773	0.81728	0.239425	0.562948	0.872939	0.273598	0.872274	0.686342	0.557325	0.613262	0.285987	0.202675	0.0866176	0.115009	0.104384	0.179104	0.0629327	0.430663	0.204499	0.273598	0	0.0834028	0.342466	0.614869	0.785219	0.271924	0	0.0679348	0.144092	0.215169	0	0.46492	0.552283	0.779817	0.335383	0.245399	0.456621	0.384224
K04487 - cysteine desulfurase [EC:2.8.1.7]	0.348606	0.560224	0.525677	0.132538	0.391965	0.34647	0.720072	0.442198	0.521648	0.547695	0.693642	0.372208	0.291886	0.319234	0.767656	0.484966	0.136799	0.560748	0.549073	0.437898	0.34496	0.238322	0.486421	0.519706	0.690052	0.313152	0.358209	0.125865	0.172265	0.408998	0.136799	0.0859845	0.166806	0.513699	0.279486	0.230947	0.407886	0.100604	0.203804	0.216138	0.430339	0.406504	0.295858	0.257732	0.366972	0.39128	0.429448	0.380518	0.377291
K00702 - cellobiose phosphorylase [EC:2.4.1.20]	0	0.280112	0.36393	0.331345	0.44096	0.476397	0.720072	0.50537	0.573813	0.456413	0.346821	0.537634	0.40864	0.638468	0.35824	0	0	0	0.274537	0.437898	0.268302	0.762631	0.608026	0.389779	0.632547	0.104384	1.01493	0.314663	0.301464	0.562372	0.889193	0.257954	0.250209	0.171233	0.558971	0.415704	0.067981	0.100604	0.0679348	0.720461	0.537924	0.348432	0.295858	0.220913	0.458716	0.335383	0.122699	0.152207	0.376711
K00602 - phosphoribosylaminoimidazolecarboxamide formyltransferase / IMP cyclohydrolase [EC:2.1.2.3 3.5.4.10]	0.149402	0.140056	0.12131	0.0662691	0.195982	0.433088	0.270027	0.189514	0.208659	0.273848	0.308285	0.165426	0.116754	0.239425	0.0511771	0.29098	0.136799	0.311526	0.549073	0.278662	0.306631	0.285987	0.567491	0.519706	0.0575043	0.104384	0.477612	0.125865	0.559862	0.664622	0.820793	1.63371	1.50125	0.428082	0.335383	0.184758	0.135962	0.704225	0.13587	0	0.215169	0	0.887574	0.62592	0.733945	0.670766	0.429448	0.380518	0.374777
K10546 - putative multiple sugar transport system substrate-binding protein	0.398406	0.373483	0.404367	0.530152	0.636943	0.259853	0.90009	0.315856	0.625978	0.182565	0.192678	0.330852	0.525394	1.03751	0.409417	0.484966	0.478796	0.436137	0.24022	0.238854	0.191644	0.190658	0.324281	0.303162	0.230017	0.521921	0.238806	0.818125	0.387597	0.357873	0.273598	0.257954	0.166806	0.256849	0.503074	0.277136	0.135962	0	0.203804	0.432277	0.215169	0.116144	0.380389	0.515464	0.412844	0.167691	0.184049	0.304414	0.36188
K01999 - branched-chain amino acid transport system substrate-binding protein	0.547809	0.466853	0.566114	0.662691	0.734934	0.606323	0.630063	0.442198	0.417319	0.410771	0.154143	0.330852	0.350263	0.798085	0.511771	0.484966	0.273598	0.311526	0.446122	0.398089	0.383289	0.285987	0.121605	0.0866176	0.40253	0.730689	0.358209	0.692259	0.258398	0.306748	0.547196	0.0859845	0.250209	0.256849	0.111794	0.230947	0.203943	0.100604	0.407609	0.288184	0.0537924	0.058072	0.380389	0.184094	0.137615	0.279486	0.184049	0.380518	0.36067
K01939 - adenylosuccinate synthase [EC:6.3.4.4]	0.348606	0.0933707	0.0808734	0	0.0979912	0.216544	0	0.126342	0.0521648	0	0.0385356	0.124069	0.233508	0	0.0511771	0.0969932	0.273598	0.186916	0.514756	0.875796	0.536604	0.762631	0.648561	1.12603	0.0575043	0	0.298507	0.0629327	1.03359	0.613497	0.615595	0.601892	0.500417	0.342466	0.447177	0.508083	0.407886	0.201207	0.13587	0.216138	0.215169	0.174216	0.633981	0.405007	0.504587	0.614869	0.613497	0.913242	0.345883
K01726 - [EC:4.2.1.-]	0.59761	0.420168	0.727861	0.0662691	0.195982	0.34647	0.90009	0.631712	0.782473	0.410771	0.115607	0.496278	0.291886	0.877893	0.255885	0.581959	0.410397	0.498442	0.102951	0.159236	0.114987	0.142993	0.16214	0.173235	0.287522	0.417537	0.179104	0.251731	0.301464	0.357873	0.205198	0.515907	0.250209	0	0	0.184758	0.339905	0.603622	0.339674	0.360231	0.430339	0.29036	0.126796	0.0736377	0.137615	0.223589	0.306748	0.684932	0.340251
K07407 - alpha-galactosidase [EC:3.2.1.22]	0.348606	0.606909	0.323494	0.530152	0.146987	0.0866176	0.090009	0.189514	0.260824	1.00411	1.11753	1.07527	0.583771	0	0.562948	0.193986	0.410397	0.249221	0.377488	0.398089	0.421617	0.0476644	0.0810701	0.476397	0.517539	0.417537	0.656716	0.503461	0.301464	0.102249	0.205198	0	0	0	0.335383	0.184758	0.339905	0.201207	0.271739	0.648415	0.537924	0.174216	0.338123	0.441826	0.229358	0.0558971	0.0613497	0	0.335561
K01667 - tryptophanase [EC:4.1.99.1]	0.0996016	0.326797	0.202184	0.0662691	0.538951	0.389779	0.270027	0.0631712	0.260824	0.319489	0.308285	0.413565	0.350263	0.159617	0.255885	0.193986	0.478796	0.186916	0.171585	0.199045	0.268302	0.524309	0.567491	0.389779	0.40253	0.626305	0.298507	0.314663	0.215332	0.408998	0.273598	0.343938	0.417014	0.256849	0.111794	0.230947	0.747791	0.905433	0.475543	0.216138	0.268962	0.174216	0.126796	0.405007	0.366972	0.279486	0.368098	0.608828	0.330181
K02837 peptide chain release factor 3	0.398406	0.280112	0.24262	0.0662691	0.195982	0.259853	0.270027	0.379027	0.260824	0.136924	0.115607	0	0.467017	0.957702	0.562948	0.484966	0.547196	0.311526	0.343171	0.318471	0.421617	0.42898	0.324281	0.216544	0.287522	0.313152	0.358209	0.125865	0.258398	0.153374	0.136799	0.171969	0.166806	0.171233	0.0558971	0.323326	0.475867	1.00604	0.543478	0.432277	0.591716	0.58072	0.126796	0.147275	0.0917431	0.279486	0.306748	0.380518	0.322402
K05813 - sn-glycerol 3-phosphate transport system substrate-binding protein	0.448207	0.420168	0.36393	0.265076	0.391965	0.259853	0.450045	0.315856	0.365154	0.36513	0.231214	0.248139	0.233508	0.319234	0.307062	0.387973	0.410397	0.436137	0.102951	0.238854	0.34496	0.190658	0.16214	0.259853	0.287522	0.939457	0.358209	0.314663	0.215332	0.306748	0.136799	0.171969	0.250209	0.342466	0.223589	0.230947	0.271924	0.603622	0.611413	0.216138	0.322754	0.174216	0.253593	0.184094	0.275229	0.335383	0.306748	0.608828	0.32209
K01190 - beta-galactosidase [EC:3.2.1.23]	0.0498008	0.326797	0.485241	0.198807	0.244978	0.259853	0.540054	0.947568	0.521648	0.410771	0.539499	0.289495	0.525394	0.319234	0.767656	0.29098	0.683995	0.249221	0.24022	0.318471	0.0766577	0.190658	0.0810701	0.129926	0.632547	0.208768	0.597015	0.440529	0.172265	0.102249	0.136799	0.0859845	0.250209	0.171233	0.223589	0.138568	0.271924	0.301811	0.611413	0.432277	0.645508	0.406504	0.0422654	0.110457	0.137615	0.167691	0.245399	0.152207	0.320267
K08659 dipeptidase	0.0996016	0.466853	0.161747	0.861498	0.146987	0.303162	0.450045	0.189514	0.260824	0.775901	0.462428	0.537634	0.116754	0.159617	0.307062	0.29098	0	0.186916	0.205903	0.199045	0.153315	0.667302	0.608026	0.216544	0.230017	0.313152	0.119403	0.188798	0.215332	0.204499	0.205198	0.429923	0.500417	0.171233	0.223589	0.323326	0.203943	0.301811	0.203804	0.360231	0.215169	0.348432	0.253593	0.405007	0.688073	0.223589	0.306748	0.456621	0.310824
K06147 ATP-binding cassette, subfamily B, bacterial	0.398406	0.280112	0.485241	0.0662691	0	0	0.090009	0.379027	0.573813	0.228206	0.346821	0.206782	0.350263	0.957702	0.460594	0.0969932	0.273598	0.124611	1.02951	0.278662	1.07321	0.0476644	0.0405351	0.0433088	0	0	0.298507	0.0629327	0.0430663	0	0.136799	0.257954	0.333611	0.428082	0.39128	0.785219	0.203943	1.30785	0.883152	0.144092	0.107585	0.058072	0.169062	0.368189	0.137615	0.335383	0.184049	0.152207	0.304583
K00688 - starch phosphorylase [EC:2.4.1.1]	0.0996016	0.0933707	0.161747	0.265076	0.0489956	0.129926	0.090009	0.0631712	0.10433	0.456413	0.539499	0.372208	0.291886	0	0.614125	0.193986	0.205198	0.685358	0.446122	0.398089	0.229973	0.42898	0.486421	0.649632	0.575043	0.208768	0.41791	0.188798	0.990525	0.306748	0	0	0.166806	0.342466	0.0558971	0.461894	0.135962	0	0.13587	0.216138	0.322754	0.058072	0.169062	0.368189	0.137615	0	1.16564	0.228311	0.285554
K00104 - glycolate oxidase [EC:1.1.3.15]	0.0498008	0.280112	0.202184	0.72896	0.195982	0.216544	0.090009	0.50537	0.312989	0.273848	0.0385356	0.206782	0.467017	0.159617	0.511771	0	0	0.249221	0.377488	0.398089	0.34496	0.524309	0.445886	0.389779	0.172513	0	0.0597015	0.125865	0.430663	0.408998	0	0	0.166806	0.428082	0.39128	0.692841	0.475867	0	0.407609	0	0	0	0.549451	0.478645	0.550459	0.670766	0.184049	0.456621	0.283739
K01262 Xaa-Pro aminopeptidase	0.199203	0.140056	0.202184	0	0.244978	0.259853	0.090009	0.126342	0.312989	0.273848	0.423892	0.330852	0.233508	0.239425	0.255885	0.581959	0.273598	0.186916	0.308854	0.318471	0.651591	0.381316	0.364816	0.216544	0.0575043	0.104384	0.119403	0.377596	0.47373	0.408998	0.410397	0.343938	0.250209	0.0856164	0.279486	0.415704	0.135962	0.402414	0.271739	0.576369	0.322754	0.406504	0.295858	0.257732	0.458716	0.111794	0.245399	0.0761035	0.281362
K00260 - glutamate dehydrogenase [EC:1.4.1.2]	0.0996016	0	0	0.198807	0.342969	0.519706	0.180018	0.568541	0.208659	0.73026	0.61657	0.70306	0	0.0798085	0.0511771	0.678952	0	0	0.514756	0.318471	0.34496	0.381316	0.202675	0.563014	0.230017	0.104384	0.41791	0	0	0.715746	0	0.0859845	0	0.171233	0.670766	0.646651	0.135962	0.804829	0.13587	0.864553	0.215169	0.232288	0.211327	0.220913	0	0	0.122699	0.0761035	0.278453
K01198 - xylan 1,4-beta-xylosidase [EC:3.2.1.37]	0.0996016	0.186741	0.202184	0.861498	0.146987	0.216544	0.630063	0.379027	0.469484	0.502054	0.192678	0.289495	0	0.0798085	0.153531	0.581959	0.615595	0.560748	0.0686342	0.0796178	0.114987	0.238322	0.24321	0.216544	0.230017	0.208768	0.179104	0	0	0.204499	0	0	0	0.428082	0.503074	0.692841	0.475867	0.201207	0.271739	0.0720461	0.0537924	0.116144	0.380389	0.552283	0.275229	0.279486	0.245399	0.304414	0.266744
K01478 - arginine deiminase [EC:3.5.3.6]	0.149402	0.466853	0.283057	0.397614	0.538951	0.0433088	0	0.0631712	0.10433	0.228206	0.346821	0.372208	0.467017	0.159617	0.460594	0	0	0.0623053	0	0.0398089	0	0.476644	0.364816	0.259853	0.230017	0.417537	0	0.566394	0.516796	0.255624	0.205198	0.601892	0.500417	0	0.223589	0.184758	0.271924	0.503018	0.475543	0.288184	0.591716	0.522648	0	0.0368189	0.0917431	0.167691	0.306748	0.304414	0.261401
K00821 - acetylornithine/N-succinyldiaminopimelate aminotransferase [EC:2.6.1.11 2.6.1.17]	0.498008	0.280112	0.444804	0.0662691	0.195982	0.173235	0.360036	0.126342	0.312989	0.273848	0.423892	0.330852	0.350263	0.159617	0.204708	0.0969932	0.410397	0.747664	0.308854	0.35828	0.229973	0.142993	0.121605	0.0866176	0.40253	0.313152	0.298507	0.188798	0.129199	0.204499	0	0.171969	0.0834028	0.256849	0.335383	0.230947	0.135962	0.100604	0.13587	0.0720461	0.322754	0.29036	0.338123	0.147275	0.0917431	0.279486	0.429448	0.380518	0.250912
K01847 - methylmalonyl-CoA mutase [EC:5.4.99.2]	0.0498008	0	0	0	0	0	0	0.252685	0.365154	0	0.231214	0.082713	0.175131	0.159617	0.0511771	0.387973	0.820793	0.685358	0.377488	0.238854	0.574933	0.0953289	0.202675	0.216544	0.172513	0.104384	0.358209	0.0629327	0.559862	0.0511247	0.136799	0.515907	0.250209	0	0.0558971	0.0461894	0.815772	0.201207	0.13587	0.0720461	0.215169	0.058072	0.507185	0.257732	0.183486	1.00615	0.245399	0.304414	0.235083
K10559 - rhamnose transport system substrate-binding protein	0.298805	0.186741	0.36393	0.530152	0.391965	0.173235	0.450045	0.252685	0.10433	0.0912825	0.154143	0.124069	0.525394	0.558659	0.460594	0	0.136799	0.0623053	0.0343171	0.0398089	0.0383289	0.238322	0.202675	0.303162	0.0575043	0.313152	0.179104	0.629327	0.301464	0.204499	0.410397	0.257954	0.333611	0.256849	0.223589	0.230947	0.067981	0	0.13587	0.216138	0.161377	0.232288	0.211327	0.147275	0.275229	0.167691	0.306748	0.228311	0.2348
K12527 - putative selenate reductase [EC:1.97.1.9]	0.199203	0.513539	0.404367	0.132538	0.146987	0.0866176	0.090009	0.315856	0.10433	0.36513	0.231214	0.289495	0.291886	0.239425	0.409417	0.678952	0.547196	0.560748	0.205903	0.318471	0.153315	0.142993	0.0810701	0.0866176	0.115009	0.104384	0.179104	0.251731	0.129199	0	0.0683995	0	0	0.171233	0.223589	0.230947	0.203943	0	0.13587	0.216138	0.107585	0.232288	0.295858	0.441826	0.275229	0.39128	0.429448	0.456621	0.234478
K11174 acetyl-CoA synthase	0.149402	0.280112	0.161747	0	0.293974	0.173235	0.090009	0.315856	0.156495	0.273848	0.231214	0.165426	0.116754	0.0798085	0.35824	0.0969932	0.410397	0.249221	0.171585	0.0796178	0.191644	0.524309	0.364816	0.303162	0.230017	0.104384	0.358209	0.125865	0.172265	0.562372	0.136799	0.515907	0.417014	0.171233	0.335383	0.230947	0.135962	0.201207	0.339674	0	0.268962	0.232288	0.380389	0.220913	0.137615	0.279486	0.184049	0.152207	0.231896
K10192 - oligogalacturonide transport system substrate-binding protein	0.298805	0.280112	0.323494	0.265076	0.44096	0.303162	0.360036	0	0.10433	0.136924	0.192678	0.248139	0.0583771	0.159617	0	0.0969932	0	0	0.0343171	0.0398089	0.0383289	0.190658	0.526956	0.476397	0.575043	0.939457	0.477612	0.440529	0.258398	0.306748	0	0.171969	0	0.256849	0.223589	0.0923788	0.135962	0.100604	0.0679348	0.0720461	0.484131	0.116144	0.549451	0.147275	0.137615	0.279486	0.245399	0.152207	0.225125
K02551 - 2-succinyl-5-enolpyruvyl-6-hydroxy-3-cyclohexene-1-carboxylate synthase [EC:2.2.1.9]	0.0996016	0.0466853	0.12131	0.331345	0.146987	0.259853	0.180018	0.252685	0.260824	0.319489	0.115607	0.248139	0.175131	0.239425	0.204708	0.0969932	0.136799	0.124611	0.137268	0.159236	0.114987	0	0.202675	0.259853	0.460035	0.626305	0.119403	0.0629327	0.129199	0.102249	0.136799	0.601892	0.667223	0.342466	0.167691	0.138568	0.203943	0.301811	0.13587	0.144092	0.484131	0.638792	0.591716	0.110457	0.0917431	0.0558971	0.0613497	0.152207	0.224188
K01745 - histidine ammonia-lyase [EC:4.3.1.3]	0.0498008	0.140056	0.0404367	0	0.195982	0.216544	0.090009	0.189514	0.0521648	0.0912825	0.115607	0.082713	0.175131	0.319234	0.255885	0.29098	0.820793	0.311526	0.137268	0.318471	0.34496	0.190658	0.16214	0.173235	0.172513	0.417537	0.179104	0.0629327	0.0861326	0	0.136799	0	0.0834028	0.171233	0.111794	0.277136	0.475867	0.201207	0.543478	1.08069	0.591716	0.696864	0.0422654	0.110457	0.183486	0.223589	0.0613497	0.0761035	0.223959
K03546 exonuclease SbcC	0.0498008	0.0466853	0.0808734	0	0.0489956	0.129926	0	0.315856	0	0.182565	0.192678	0.0413565	0.291886	0.798085	0.409417	0.0969932	0.410397	0.249221	0.308854	0.0398089	0.114987	0	0	0	0	0	0.0597015	0.125865	0.215332	0.153374	0.273598	0.257954	0.417014	0	0.0558971	0.0923788	0.611829	2.01207	0.951087	0.144092	0.161377	0.116144	0.0422654	0.147275	0.0458716	0.167691	0.122699	0.152207	0.211127
K00639 - glycine C-acetyltransferase [EC:2.3.1.29]	0.249004	0.186741	0.24262	0	0.0489956	0.0866176	0.360036	0.126342	0.312989	0.0912825	0.115607	0.165426	0.0583771	0.718276	0	0.387973	0.615595	0.498442	0.102951	0.318471	0.383289	0.0476644	0	0.0866176	0.40253	0.626305	0.179104	0	0.0430663	0	0.0683995	0.0859845	0	0.171233	0.0558971	0.0923788	0.271924	0.301811	0.407609	0.792507	0.268962	0.348432	0.126796	0.184094	0.0458716	0.167691	0.122699	0.152207	0.210809
K10108 - maltose/maltodextrin transport system substrate-binding protein	0	0.0466853	0.12131	0.596421	0.146987	0.34647	0	0	0	0.228206	0.500963	0.578991	0.81728	0.0798085	0.153531	0	0	0.0623053	0.0686342	0.0398089	0.268302	0.0953289	0.364816	0.129926	0.345026	0.417537	0.238806	0.125865	0.387597	0.0511247	0.0683995	0	0	1.19863	0.167691	0.461894	0.475867	0	0	0.216138	0.0537924	0.058072	0.0422654	0.184094	0.0458716	0.111794	0.306748	0.380518	0.20799
K03695 ATP-dependent Clp protease ATP-binding subunit ClpB	0.348606	0.326797	0.24262	0.0662691	0.244978	0.259853	0.270027	0.315856	0.365154	0.0912825	0.154143	0.124069	0.291886	0.239425	0.153531	0	0	0	0.171585	0.199045	0.191644	0.190658	0.121605	0.0866176	0.230017	0.521921	0.358209	0	0	0	0	0	0	0	0.111794	0.0461894	0.271924	1.20724	0.815217	0.360231	0.215169	0.29036	0	0	0	0.447177	0.306748	0.304414	0.207131
K00945 - cytidylate kinase [EC:2.7.4.14]	0.896414	0.840336	0.36393	0.0662691	0.391965	0.303162	0.270027	0.379027	0.417319	0	0	0	0	0	0	0	0	0	0	0	0	0.142993	0.0405351	0.0433088	0	0	0	0.377596	0.559862	0.153374	0	0	0	0	0	0	0	0.905433	0.815217	0.288184	0.322754	0.174216	0	0	0	1.28563	0.552147	0.228311	0.204542
K00789 - S-adenosylmethionine synthetase [EC:2.5.1.6]	0.249004	0.326797	0.161747	0.0662691	0.0979912	0.129926	0.090009	0.126342	0.260824	0	0.154143	0.082713	0.116754	0.319234	0.204708	0.0969932	0.341997	0.373832	0.24022	0.278662	0.383289	0.333651	0.202675	0.129926	0.172513	0.104384	0.298507	0.188798	0.344531	0.357873	0.410397	0	0	0.0856164	0.223589	0.138568	0.203943	0	0.0679348	0.864553	0.268962	0.232288	0.0422654	0.257732	0	0.223589	0.0613497	0.456621	0.203578
K05349 - beta-glucosidase [EC:3.2.1.21]	0.348606	0.326797	0.36393	0.0662691	0.0979912	0.129926	0.450045	0.189514	0.208659	0.273848	0.462428	0.413565	0.291886	0.478851	0.35824	0	0.205198	0.311526	0.308854	0.318471	0.383289	0.238322	0.202675	0.216544	0	0	0	0.125865	0.215332	0.153374	0.410397	0.429923	0.166806	0	0.111794	0	0.067981	0	0	0.432277	0.322754	0.058072	0.211327	0.147275	0.137615	0	0	0.0761035	0.20234
K01372 bleomycin hydrolase	0.64741	0.373483	0.36393	0.198807	0.0979912	0.649632	0.090009	0.315856	0.10433	0.182565	0.231214	0.124069	0.291886	0.319234	0.153531	0.29098	0.273598	0.124611	0.308854	0.318471	0.383289	0.190658	0.121605	0.0866176	0.115009	0.104384	0.179104	0.125865	0.172265	0.255624	0	0.0859845	0.250209	0	0.0558971	0.184758	0.475867	0.100604	0.203804	0.216138	0.161377	0.058072	0.0845309	0.0368189	0.0917431	0.167691	0.184049	0.152207	0.20218
K00239 - succinate dehydrogenase flavoprotein subunit [EC:1.3.99.1]	0.0996016	0.0933707	0.161747	0	0	0	0	0.0631712	0.0521648	0	0.0385356	0.124069	0.175131	0.558659	0.102354	0	0.478796	0	0.274537	0.159236	0.229973	0.0476644	0.16214	0.0433088	0.0575043	0	0.358209	0.251731	0.602929	0.306748	0.957592	0.343938	0.500417	0.171233	0.167691	0.0923788	0.407886	0.201207	0.339674	0.0720461	0.268962	0.058072	0.0845309	0.220913	0.0917431	0.503074	0.490798	0.228311	0.200876
K00008 - L-iditol 2-dehydrogenase [EC:1.1.1.14]	0.0498008	0.140056	0.24262	0.132538	0.195982	0.129926	0.090009	0.189514	0.10433	0.36513	0.385356	0.248139	0.116754	0.0798085	0.0511771	0.0969932	0.0683995	0.124611	0.0343171	0.278662	0.0383289	0.476644	0.729631	0.779558	0.172513	0.104384	0.0597015	0.125865	0.129199	0.102249	0.205198	0.0859845	0.166806	0.0856164	0.223589	0.0923788	0.135962	0.100604	0.339674	0.144092	0.268962	0.174216	0.211327	0.478645	0.229358	0.279486	0.184049	0.228311	0.197426
K01026 - propionate CoA-transferase [EC:2.8.3.1]	0.298805	0.233427	0.323494	0.265076	0.342969	0.34647	0.090009	0.126342	0.260824	0.228206	0.115607	0.289495	0.116754	0.159617	0.102354	0.193986	0.341997	0.186916	0.0343171	0.238854	0.191644	0.0953289	0.202675	0.173235	0.115009	0.208768	0.298507	0.0629327	0.215332	0.102249	0	0.0859845	0.166806	0.0856164	0.0558971	0.0923788	0.203943	0.402414	0.13587	0.288184	0.322754	0.29036	0.0422654	0.0368189	0.137615	0.335383	0.306748	0.380518	0.194391
K12308 - beta-galactosidase [EC:3.2.1.23]	0	0.0933707	0.12131	0.861498	0.587947	0.606323	0.180018	0	0.10433	0.410771	0.231214	0.082713	0.0583771	0	0.204708	0	0	0.373832	0.480439	0.437898	0.306631	0.0953289	0.405351	0.0433088	0.0575043	0.104384	0.0597015	0.314663	0.129199	0.306748	0	0.171969	0.0834028	0.0856164	0.111794	0.138568	0.271924	0	0.13587	0.288184	0.0537924	0.29036	0.0422654	0.220913	0.321101	0.0558971	0.245399	0	0.191138
K01858 - myo-inositol-1-phosphate synthase [EC:5.5.1.4]	0.199203	0.140056	0	0	0.146987	0.129926	0.180018	0.0631712	0.260824	0.0912825	0.231214	0.124069	0.0583771	0.159617	0	0.193986	0.205198	0.124611	0.274537	0.318471	0.498275	0.142993	0.121605	0.216544	0.172513	0.208768	0.179104	0	0.301464	0.153374	0.0683995	0.0859845	0	0	0.279486	0.230947	0.339905	0.301811	0.203804	0.432277	0.322754	0.58072	0.0845309	0.0736377	0.0458716	0.39128	0.245399	0.228311	0.183569
K00924 Phosphotransferases with an alcohol group as acceptor	0.0996016	0.186741	0.202184	0.198807	0.195982	0.173235	0.360036	0.315856	0.312989	0.228206	0.308285	0.289495	0.233508	0.239425	0.204708	0.29098	0.0683995	0	0.137268	0.159236	0.191644	0.0953289	0.0810701	0.0866176	0.172513	0.104384	0.238806	0.188798	0.172265	0.153374	0.273598	0	0	0.256849	0.167691	0.184758	0.407886	0.100604	0.13587	0.0720461	0.0537924	0.058072	0.169062	0.110457	0.321101	0.279486	0.184049	0.304414	0.182697
K00174 - 2-oxoglutarate ferredoxin oxidoreductase subunit alpha [EC:1.2.7.3]	0.298805	0.186741	0.161747	0	0.489956	0.519706	0.090009	0.0631712	0.10433	0.136924	0.385356	0.206782	0.175131	0.159617	0	0.0969932	0.136799	0	0.274537	0.238854	0.34496	0.142993	0.0810701	0.0866176	0.172513	0.208768	0.238806	0.0629327	0.172265	0.204499	0.273598	0.171969	0.333611	0	0.167691	0.138568	0.135962	0	0.203804	0	0.268962	0.348432	0.126796	0.33137	0.137615	0.111794	0.245399	0.152207	0.17893
K04072 - acetaldehyde dehydrogenase / alcohol dehydrogenase [EC:1.2.1.10 1.1.1.1]	0.0498008	0.0933707	0.12131	0.132538	0.195982	0.216544	0.090009	0	0.156495	0.0912825	0.385356	0.124069	0.233508	0	0.767656	0	0.205198	0	0.171585	0.159236	0.0383289	0.238322	0.364816	0.129926	0	0	0.0597015	0.377596	0.172265	0.204499	0.205198	0.429923	0.250209	0.0856164	0.0558971	0.277136	0	0.201207	0.0679348	0.144092	0.376547	0.348432	0	0.441826	0.137615	0.0558971	0.368098	0.304414	0.177697
K00927 - phosphoglycerate kinase [EC:2.7.2.3]	0	0.0466853	0.12131	0.132538	0.146987	0.0866176	0.270027	0.189514	0.312989	0.228206	0.0770713	0.537634	0	0.159617	0.102354	0.0969932	0.410397	0.186916	0.24022	0.238854	0.0383289	0.0476644	0.16214	0.173235	0.345026	0.208768	0.238806	0.188798	0.258398	0.102249	0	0	0.250209	0.0856164	0.0558971	0	0.203943	0.100604	0.407609	0	0	0	0.718512	0.405007	0.275229	0.111794	0.368098	0.152207	0.176731
K00048 - lactaldehyde reductase [EC:1.1.1.77]	0.0498008	0.233427	0.202184	0.0662691	0.293974	0.173235	0.180018	0.442198	0.156495	0.0456413	0.0770713	0.206782	0.175131	0	0	0.29098	0.205198	0.311526	0.24022	0.159236	0.0766577	0.142993	0.0405351	0.129926	0.230017	0.208768	0.238806	0.125865	0.0861326	0.102249	0.0683995	0.0859845	0	0.342466	0.335383	0.230947	0.271924	0	0.0679348	0.648415	0.0537924	0.29036	0.211327	0.441826	0.0917431	0.167691	0.0613497	0.0761035	0.173687
K00850 - 6-phosphofructokinase 1 [EC:2.7.1.11]	0.0498008	0.140056	0.161747	0.132538	0.293974	0.129926	0.180018	0.189514	0.156495	0.0456413	0.0385356	0.289495	0.233508	0.0798085	0.102354	0.193986	0.205198	0.249221	0.24022	0.238854	0.153315	0.0953289	0.0405351	0.216544	0.517539	0.417537	0.298507	0.188798	0.215332	0.153374	0.273598	0.0859845	0.333611	0.0856164	0.111794	0.0923788	0.203943	0.100604	0.203804	0.0720461	0.107585	0.058072	0.126796	0.0736377	0.0458716	0.111794	0	0.380518	0.16907
K00849 - galactokinase [EC:2.7.1.6]	0.199203	0.280112	0.161747	0	0.293974	0.259853	0.270027	0.252685	0.156495	0.228206	0.308285	0.206782	0.233508	0	0.0511771	0.0969932	0.136799	0.186916	0.24022	0.199045	0.191644	0.142993	0.121605	0.0433088	0.172513	0	0.179104	0.0629327	0.301464	0.102249	0.0683995	0.0859845	0.166806	0.342466	0.223589	0.138568	0.135962	0.100604	0	0.144092	0.107585	0	0.253593	0.257732	0.275229	0.167691	0.184049	0.152207	0.164258
K01439 - succinyl-diaminopimelate desuccinylase [EC:3.5.1.18]	0.0996016	0.326797	0.283057	0.463883	0.195982	0.34647	0.180018	0.0631712	0.10433	0.136924	0.0385356	0.206782	0.116754	0.399042	0.102354	0.193986	0	0.124611	0.343171	0.437898	0.229973	0.238322	0	0.0433088	0.0575043	0	0.0597015	0.125865	0.215332	0.153374	0.0683995	0	0.166806	0.0856164	0.0558971	0.0923788	0.067981	0.100604	0.0679348	0.216138	0.161377	0.348432	0.126796	0.0368189	0.275229	0.167691	0.184049	0.228311	0.161192
K01989 putative ABC transport system substrate-binding protein	0.64741	0.0466853	0.283057	0.331345	0.195982	0.0433088	0.270027	0.189514	0.208659	0.410771	0.462428	0.454921	0.175131	0.239425	0.255885	0.29098	0.136799	0.249221	0.137268	0.318471	0.114987	0	0.202675	0.129926	0.40253	0.313152	0	0.251731	0.0861326	0	0	0	0	0.0856164	0.0558971	0.0923788	0	0	0.0679348	0.216138	0	0	0.253593	0.0368189	0	0	0	0	0.159517
K00382 - dihydrolipoamide dehydrogenase [EC:1.8.1.4]	0.0996016	0.140056	0.12131	0	0.195982	0.173235	0.090009	0.189514	0.10433	0.0456413	0.0770713	0.082713	0.233508	0.718276	0.255885	0.387973	0.547196	0.249221	0.171585	0.199045	0.229973	0.0953289	0.0810701	0.0433088	0.172513	0.104384	0.179104	0.0629327	0.0861326	0	0.0683995	0.0859845	0.0834028	0	0.223589	0.0923788	0.203943	0.100604	0.0679348	0.360231	0.215169	0.174216	0	0.110457	0.0458716	0.279486	0.245399	0.152207	0.159295
K03592 PmbA protein	0.249004	0.0933707	0.202184	0	0.0979912	0.0433088	0.090009	0.126342	0.365154	0	0	0	0.291886	0.478851	0.307062	0.29098	0.410397	0.124611	0.308854	0.318471	0.421617	0.0476644	0	0	0.287522	0.104384	0.179104	0	0	0.0511247	0	0	0.0834028	0	0.0558971	0.138568	0.067981	0.100604	0	0.504323	0.376547	0.348432	0.253593	0.184094	0.137615	0.223589	0.122699	0.0761035	0.15757
K02858 - 3,4-dihydroxy 2-butanone 4-phosphate synthase	0.0498008	0.0466853	0.0808734	0	0	0	0	0.379027	0	0	0.154143	0.124069	0.116754	0.558659	0.665302	0	0	0	0.343171	0.0796178	0.114987	0.0476644	0.0405351	0.0866176	0.40253	0.104384	0.597015	0.0629327	0	0	0.0683995	0.0859845	0.0834028	0.0856164	0	0.0461894	0.475867	0.603622	0.611413	0.144092	0.537924	0.464576	0	0	0	0.223589	0.0613497	0	0.157225
K01712 - urocanate hydratase [EC:4.2.1.49]	0.0498008	0.0466853	0	0	0.146987	0.303162	0	0	0.10433	0.136924	0.231214	0.206782	0	0.0798085	0.102354	0.484966	0.478796	0.0623053	0.102951	0.0398089	0.153315	0.142993	0.364816	0.259853	0	0	0	0.125865	0.129199	0.153374	0.205198	0.171969	0.250209	0.0856164	0.111794	0.0923788	0.135962	0.804829	0.203804	0.216138	0.161377	0	0.0422654	0.147275	0.366972	0.223589	0.245399	0.152207	0.156735
K01006 - pyruvate, orthophosphate dikinase [EC:2.7.9.1]	0	0	0	0	0	0	0	0	0	0	0	0	0	0	0	0	0	0	0.137268	0	0.0383289	0	0.0405351	0.736249	0.115009	0	0.0597015	0	0.430663	0.869121	0	0	0	0.256849	0	0	0.067981	0	0.271739	0	0	0	1.73288	0.95729	0.0917431	0	1.10429	0.608828	0.156635
K01200 pullulanase	0.0996016	0.0933707	0.323494	0.0662691	0.0489956	0	0.090009	0.0631712	0.0521648	0.273848	0.231214	0.289495	0.583771	0.399042	0.460594	0	0	0	0.308854	0.0398089	0.114987	0.238322	0.121605	0.216544	0.0575043	0.104384	0.0597015	0.314663	0.215332	0	0	0	0	0	0	0.138568	0.407886	0.503018	0	0	0.322754	0.29036	0.380389	0.257732	0.0458716	0	0.122699	0.152207	0.156005
K01848 - methylmalonyl-CoA mutase	0.199203	0.0933707	0.0404367	0	0.0979912	0.129926	0	0.0631712	0	0.136924	0	0	0.116754	0	0.255885	0	0	0	0.24022	0.119427	0.306631	0.0476644	0.0810701	0	0.115009	0	0.0597015	0.377596	0.258398	0.255624	0.889193	0.94583	0.917431	0	0	0	0.135962	0.100604	0.339674	0	0.0537924	0.116144	0.126796	0.110457	0.321101	0.167691	0.0613497	0.0761035	0.153274
K10117 - multiple sugar transport system substrate-binding protein	0.0498008	0.140056	0.0404367	0.132538	0.146987	0.129926	0.360036	0.126342	0.156495	0.0912825	0.154143	0.248139	0.350263	0.159617	0.102354	0.29098	0.478796	0.249221	0.102951	0.199045	0.191644	0	0	0	0.172513	0.208768	0.179104	0.314663	0.215332	0.0511247	0.136799	0	0	0.0856164	0.0558971	0	0	0	0	0.0720461	0.107585	0.116144	0.295858	0.257732	0.321101	0.167691	0.184049	0.380518	0.150492
K01929 - UDP-N-acetylmuramoyl-tripeptide--D-alanyl-D-alanine ligase [EC:6.3.2.10]	0.0498008	0.140056	0.0404367	0	0.0489956	0	0.090009	0.315856	0.260824	0.182565	0.231214	0.165426	0.116754	0.478851	0.204708	0	0.136799	0	0.308854	0.0398089	0.383289	0.0953289	0.0810701	0.0866176	0.230017	0.313152	0.41791	0	0.0430663	0	0	0	0.0834028	0.256849	0.223589	0.277136	0.339905	0.402414	0.271739	0.0720461	0.107585	0	0.126796	0.0736377	0	0.223589	0.245399	0	0.149281
K01733 - threonine synthase [EC:4.2.3.1]	0	0.0466853	0	0.132538	0	0.0866176	0.180018	0.126342	0.0521648	0.182565	0	0.0413565	0.116754	0.239425	0.0511771	0.0969932	0.0683995	0	0.102951	0.199045	0.229973	0.238322	0.324281	0.34647	0.287522	0.208768	0.238806	0	0.172265	0.255624	0.273598	0	0	0.256849	0.0558971	0.323326	0.135962	0.100604	0.271739	0	0.107585	0.058072	0.211327	0.257732	0.0917431	0.447177	0.368098	0.0761035	0.147102
K01258 tripeptide aminopeptidase	0	0.186741	0.24262	0.198807	0.0489956	0.0866176	0	0.252685	0.10433	0.273848	0.192678	0.289495	0.40864	0.159617	0.307062	0.0969932	0.0683995	0.249221	0.171585	0.119427	0.191644	0.142993	0.121605	0.0866176	0.230017	0	0.179104	0	0.0430663	0.102249	0.410397	0.0859845	0.166806	0	0.0558971	0.0923788	0.339905	0	0.0679348	0.216138	0.268962	0.116144	0.0845309	0.0368189	0.229358	0.111794	0.0613497	0.0761035	0.145324
K00024 - malate dehydrogenase [EC:1.1.1.37]	0.199203	0	0.0808734	0	0	0.129926	0	0.0631712	0.0521648	0	0.0385356	0.082713	0.116754	0.319234	0	0.775946	0.341997	0.0623053	0.102951	0.278662	0.0766577	0	0	0.216544	0.115009	0.104384	0.0597015	0	0.0430663	0	0.0683995	0.171969	0.250209	0.171233	0.0558971	0.184758	0	0	0.0679348	0.648415	0.537924	0.406504	0.803043	0.0368189	0	0.111794	0.0613497	0.0761035	0.144003
K10206 - LL-diaminopimelate aminotransferase [EC:2.6.1.83]	0.249004	0.280112	0.12131	0.0662691	0.146987	0.173235	0.180018	0.0631712	0.0521648	0.182565	0.26975	0.248139	0.291886	0.239425	0.153531	0	0	0.186916	0.0686342	0.199045	0.191644	0.190658	0.16214	0.0433088	0.230017	0.208768	0.119403	0.125865	0.215332	0.357873	0.273598	0	0	0.256849	0.223589	0.138568	0	0	0.203804	0	0.0537924	0	0	0.0736377	0.275229	0	0.122699	0.0761035	0.139897
K07248 - lactaldehyde dehydrogenase / glycolaldehyde dehydrogenase [EC:1.2.1.22 1.2.1.21]	0.0996016	0.140056	0.0808734	0	0	0.0866176	0.090009	0.252685	0.10433	0.0456413	0.231214	0.165426	0.291886	0.159617	0.102354	0	0	0	0.446122	0.437898	0.34496	0.0476644	0.0405351	0	0.345026	0.208768	0.298507	0	0	0	0	0	0	0	0.167691	0.138568	0.475867	0.301811	0.13587	0.360231	0.161377	0.348432	0.0422654	0.0368189	0.0458716	0.167691	0.0613497	0	0.134659
K04043 - molecular chaperone DnaK	0	0	0	0	0	0	0	0	0	0	0	0.0413565	0	0	0	0	0.0683995	0	0.411805	0.0796178	0.268302	0.0476644	0	0.389779	0.115009	0	0.238806	0.0629327	0.81826	1.02249	0	0	0	0.0856164	0.0558971	0.184758	0.203943	0	0.0679348	0	0	0.116144	0.295858	0.662739	0.321101	0.167691	0.184049	0.532725	0.134227
K01428 - urease subunit alpha [EC:3.5.1.5]	0	0.140056	0.0404367	0.331345	0.0979912	0.0866176	0.270027	0.315856	0.312989	0.319489	0.192678	0.082713	0.175131	0.0798085	0.255885	0.193986	0	0.186916	0.171585	0	0.0766577	0.142993	0.0810701	0.0433088	0.287522	0.835073	0.179104	0.125865	0.0430663	0	0	0	0	0.171233	0.0558971	0.0461894	0.067981	0	0.13587	0.288184	0.0537924	0	0	0	0	0	0.122699	0.228311	0.129965
K03664 SsrA-binding protein	0.298805	0.280112	0	0.0662691	0	0.0433088	0.090009	0.126342	0.0521648	0.0456413	0.154143	0.206782	0	0	0	0	0	0	0.24022	0.35828	0.268302	0.0476644	0.0810701	0	0	0	0	0.188798	0.172265	0.0511247	0	0.0859845	0	0	0	0.0461894	0.407886	0.704225	0.475543	0.576369	0.161377	0.29036	0.169062	0.0368189	0.0458716	0.167691	0.0613497	0.0761035	0.126586
K03851 - taurine-pyruvate aminotransferase [EC:2.6.1.77]	0.249004	0.373483	0.24262	0	0	0	0.090009	0.0631712	0.10433	0.273848	0.115607	0.165426	0	0	0	0.387973	0.0683995	0.311526	0.0343171	0.199045	0.191644	0.0953289	0.0405351	0.0866176	0	0	0	0.0629327	0.0861326	0	0.136799	0.171969	0.250209	0.0856164	0.0558971	0.0461894	0.135962	0.301811	0.203804	0.216138	0.107585	0.058072	0.126796	0.147275	0.183486	0.111794	0.245399	0.228311	0.126147
K01465 - dihydroorotase [EC:3.5.2.3]	0.149402	0.140056	0.0808734	0	0.146987	0.129926	0.090009	0.189514	0.10433	0	0.0770713	0	0.116754	0.399042	0.204708	0.0969932	0.0683995	0.0623053	0.102951	0.0796178	0.153315	0.0953289	0.202675	0.129926	0.0575043	0.208768	0	0.188798	0.172265	0.255624	0.341997	0.257954	0.500417	0	0.0558971	0.138568	0	0.100604	0	0	0.215169	0.174216	0.0845309	0.110457	0.137615	0.111794	0.0613497	0	0.124869
K03340 - diaminopimelate dehydrogenase [EC:1.4.1.16]	0.149402	0.0466853	0.161747	0	0	0.0866176	0	0.379027	0.417319	0.182565	0.115607	0.124069	0	0.0798085	0.0511771	0.0969932	0.136799	0.124611	0.137268	0.0398089	0.0383289	0	0.121605	0.129926	0.115009	0.104384	0.0597015	0	0.258398	0.102249	0.136799	0.257954	0.0834028	0.342466	0.223589	0.277136	0	0	0.0679348	0.288184	0.268962	0.406504	0.0845309	0.0736377	0	0.0558971	0	0	0.121377
K00266 - glutamate synthase (NADPH/NADH) small chain [EC:1.4.1.13 1.4.1.14]	0	0.0933707	0.0404367	0	0	0.0866176	0	0.0631712	0.0521648	0.228206	0.115607	0.124069	0.350263	0	0.204708	0	0.136799	0	0.102951	0.199045	0.0383289	0.142993	0.0810701	0.129926	0.115009	0	0.238806	0.188798	0.301464	0.460123	0.0683995	0	0.166806	0.0856164	0.167691	0.0923788	0	0	0	0.0720461	0	0.232288	0.211327	0.368189	0.229358	0.223589	0.184049	0.228311	0.121333
K01952 - phosphoribosylformylglycinamidine synthase [EC:6.3.5.3]	0	0	0.0404367	0.198807	0.146987	0	0	0	0	0	0.0385356	0	0.0583771	0	0	0	0.0683995	0	0.137268	0.119427	0.153315	0.0476644	0.0405351	0.303162	0.0575043	0	0	0.188798	1.11972	0.817996	0.752394	0	0	0.0856164	0.335383	0.230947	0	0	0	0	0	0	0.211327	0.220913	0.366972	0.0558971	0	0	0.120758
K00611 - ornithine carbamoyltransferase [EC:2.1.3.3]	0.0996016	0.140056	0.0808734	0.0662691	0.244978	0.0866176	0	0	0	0.0456413	0.0770713	0.0413565	0.116754	0.159617	0.0511771	0.484966	0	0.186916	0.171585	0.0398089	0.0383289	0.0953289	0.0810701	0.0433088	0.0575043	0.104384	0.0597015	0.0629327	0.0430663	0.153374	0.273598	0.0859845	0.166806	0.0856164	0.111794	0.0923788	0.271924	0.503018	0.13587	0.144092	0.107585	0.058072	0.169062	0.0368189	0.0917431	0.223589	0.245399	0.0761035	0.118995
K01881 - prolyl-tRNA synthetase [EC:6.1.1.15]	0	0.0466853	0.202184	0.132538	0.0489956	0.216544	0.450045	0.189514	0.365154	0.182565	0.0770713	0.082713	0.0583771	0.319234	0.153531	0.29098	0.341997	0.124611	0.137268	0.0796178	0.114987	0.0476644	0	0	0.230017	0.208768	0.119403	0.125865	0.0430663	0.153374	0.0683995	0	0	0	0.0558971	0.0923788	0.135962	0	0	0	0.0537924	0.232288	0	0.0368189	0.0917431	0.111794	0.184049	0.0761035	0.118375
K04021 - aldehyde dehydrogenase	0.199203	0.280112	0.24262	0.132538	0.146987	0.173235	0.180018	0.126342	0.0521648	0.0912825	0.0385356	0.165426	0.116754	0.0798085	0.204708	0.0969932	0.0683995	0.0623053	0.102951	0.119427	0.0383289	0.0953289	0.0405351	0.0433088	0.172513	0	0.179104	0.188798	0.0430663	0.102249	0.136799	0.0859845	0.0834028	0.171233	0.0558971	0.0923788	0.067981	0.201207	0.203804	0.0720461	0.0537924	0.174216	0.0845309	0.0368189	0.183486	0.167691	0.0613497	0.152207	0.118081
K00613 - glycine amidinotransferase [EC:2.1.4.1]	0.149402	0.373483	0.24262	0	0.195982	0.0433088	0.180018	0.0631712	0.10433	0.0456413	0.231214	0.0413565	0.0583771	0	0.0511771	0	0	0.0623053	0.171585	0.159236	0.114987	0.0953289	0.0405351	0.173235	0.115009	0	0.119403	0	0.0861326	0.204499	0.136799	0.0859845	0	0.0856164	0.0558971	0.184758	0.135962	0	0	0.0720461	0.107585	0.058072	0.253593	0.147275	0.366972	0.39128	0.184049	0.152207	0.115426
K02012 - iron(III) transport system substrate-binding protein	0.0498008	0.0933707	0.12131	0.0662691	0.0979912	0.0866176	0.090009	0	0.10433	0	0	0	0.233508	0.0798085	0.204708	0	0	0.186916	0.102951	0.0398089	0.0766577	0.238322	0.121605	0.0866176	0.115009	0.104384	0.179104	0.0629327	0.0861326	0	0.0683995	0	0	0.428082	0.111794	0.138568	0.067981	0.201207	0.13587	0.288184	0.107585	0.232288	0.253593	0.220913	0.0917431	0.279486	0.122699	0.152207	0.115183
K00483 - 4-hydroxyphenylacetate-3-monooxygenase large chain [EC:1.14.14.9]	0.149402	0.186741	0.161747	0	0	0.0433088	0.360036	0.315856	0.208659	0.0456413	0.0385356	0.0413565	0.0583771	0.239425	0.102354	0.29098	0.341997	0.498442	0.137268	0.35828	0.114987	0	0.0810701	0	0	0.104384	0.0597015	0.0629327	0	0	0.0683995	0.0859845	0	0	0	0	0.067981	0.100604	0.0679348	0.216138	0.484131	0.116144	0	0	0.0917431	0.111794	0	0.0761035	0.114343
K00818 - acetylornithine aminotransferase [EC:2.6.1.11]	0.249004	0.0466853	0.12131	0.397614	0.0489956	0.129926	0.180018	0.252685	0.208659	0.0912825	0.26975	0.165426	0.116754	0.0798085	0.153531	0.193986	0.136799	0.0623053	0.0686342	0.119427	0.114987	0.0476644	0	0	0.172513	0.313152	0.0597015	0.188798	0.258398	0.204499	0.205198	0	0	0.0856164	0.0558971	0.138568	0	0	0	0.288184	0.107585	0.116144	0	0.0368189	0	0	0	0	0.114298
K01305 beta-aspartyl-dipeptidase (metallo-type)	0.298805	0.233427	0.161747	0	0.0489956	0.0433088	0.090009	0.0631712	0.0521648	0.0912825	0.231214	0.0413565	0.233508	0	0.255885	0.0969932	0.0683995	0.373832	0.0686342	0.159236	0.114987	0.0476644	0.0405351	0	0.345026	0.313152	0.358209	0	0	0	0	0.0859845	0	0.0856164	0.279486	0.0461894	0.067981	0.100604	0.271739	0	0	0	0	0	0	0	0.184049	0.380518	0.111119
K00005 - glycerol dehydrogenase [EC:1.1.1.6]	0.0498008	0.0466853	0.0808734	0.198807	0.0979912	0.173235	0.270027	0.126342	0.156495	0.273848	0.0770713	0.082713	0.233508	0.0798085	0.307062	0.193986	0.0683995	0.124611	0.137268	0.0796178	0.0766577	0.0476644	0.0810701	0.0866176	0.0575043	0.104384	0.0597015	0.0629327	0.0861326	0.102249	0	0.0859845	0	0.0856164	0.111794	0.0461894	0.135962	0.100604	0.0679348	0.216138	0.0537924	0.174216	0.0422654	0.0736377	0.0458716	0.111794	0.0613497	0.152207	0.108092
K01623 - fructose-bisphosphate aldolase	0.0498008	0	0.0404367	0	0.342969	0.216544	0.090009	0.126342	0.156495	0	0.154143	0	0.0583771	0.159617	0.0511771	0	0.0683995	0.0623053	0.102951	0.0796178	0.0383289	0.142993	0.283745	0.129926	0.172513	0	0.0597015	0.125865	0.215332	0.204499	0	0	0	0	0.223589	0.138568	0.067981	0	0.0679348	0.216138	0.161377	0.29036	0.0845309	0.294551	0.0917431	0.111794	0.122699	0.152207	0.107408
K12373 - hexosaminidase [EC:3.2.1.52]	0.199203	0.280112	0.202184	0	0	0	0	0.379027	0.208659	0	0.0385356	0.0413565	0	0	0	0.0969932	0.478796	0.0623053	0	0	0	0.0476644	0	0	0	0	0.0597015	0	0	0	0.0683995	0.0859845	0.0834028	0	0	0.0461894	0.611829	0.804829	0.339674	0.216138	0.376547	0.29036	0.0422654	0	0	0	0.0613497	0	0.106698
K01940 - argininosuccinate synthase [EC:6.3.4.5]	0	0.186741	0.161747	0.198807	0.146987	0.0866176	0.090009	0.126342	0.0521648	0.136924	0.0770713	0.124069	0.0583771	0	0.153531	0.0969932	0	0	0.137268	0.119427	0.191644	0.0953289	0.0405351	0.129926	0	0	0	0.188798	0.215332	0.306748	0	0	0	0.256849	0.223589	0.138568	0.067981	0	0.0679348	0	0	0.058072	0.422654	0.257732	0.321101	0	0.184049	0	0.106665
K01081 - 5'-nucleotidase [EC:3.1.3.5]	0.0996016	0.233427	0.0808734	0.132538	0.0979912	0	0	0.126342	0.156495	0	0	0	0.116754	0	0.0511771	0	0.0683995	0.0623053	0.0343171	0.0398089	0.0383289	0.238322	0.121605	0.216544	0	0.104384	0.0597015	0.251731	0.129199	0.102249	0.136799	0.171969	0.333611	0.171233	0.167691	0.0923788	0.135962	0.100604	0	0.144092	0.107585	0.232288	0.0422654	0.0368189	0.0458716	0.167691	0.122699	0.152207	0.10258
K01698 - porphobilinogen synthase [EC:4.2.1.24]	0.0498008	0.0933707	0.12131	0.0662691	0.0489956	0.0433088	0.090009	0.189514	0.156495	0.0456413	0.0385356	0.0413565	0.116754	0	0.204708	0.0969932	0.0683995	0.311526	0.171585	0.0796178	0.114987	0.0476644	0.121605	0.173235	0.230017	0.104384	0	0.125865	0.0861326	0.0511247	0	0.171969	0.166806	0.0856164	0.111794	0.0461894	0.067981	0	0.0679348	0.144092	0.268962	0.174216	0.126796	0.0736377	0	0.0558971	0.122699	0.0761035	0.10104
K00031 - isocitrate dehydrogenase [EC:1.1.1.42]	0.0996016	0.0466853	0.0404367	0	0	0.0433088	0	0	0.0521648	0.273848	0.154143	0.165426	0.291886	0	0.35824	0	0	0.249221	0.171585	0.119427	0.153315	0.0476644	0.0405351	0.129926	0.172513	0	0.119403	0.0629327	0.172265	0.102249	0.136799	0	0.250209	0	0.111794	0.0461894	0.135962	0	0.0679348	0	0.215169	0.058072	0.126796	0.184094	0.275229	0	0.0613497	0.0761035	0.10026
K03671 thioredoxin 1	0.249004	0.140056	0.12131	0.0662691	0.0979912	0.0866176	0.090009	0.0631712	0.0521648	0.0912825	0.154143	0.082713	0.116754	0.0798085	0.102354	0.193986	0.205198	0.0623053	0.0686342	0.0398089	0.0383289	0.0476644	0.0810701	0.129926	0.0575043	0.104384	0.0597015	0.188798	0.0861326	0.204499	0.136799	0.257954	0.0834028	0.0856164	0.0558971	0.0923788	0.067981	0.100604	0.13587	0.0720461	0.0537924	0.058072	0.0422654	0.0736377	0.0917431	0.0558971	0.0613497	0.0761035	0.0992292
K00616 - transaldolase [EC:2.2.1.2]	0	0.0466853	0	0.265076	0.146987	0.259853	0	0	0	0.136924	0.0770713	0.165426	0	0	0.102354	0	0	0.0623053	0.24022	0.0398089	0.0383289	0.142993	0.0810701	0.0433088	0	0	0	0.188798	0.129199	0.357873	0	0	0	0.0856164	0	0.230947	0.067981	0.100604	0	0	0.0537924	0.174216	0.253593	0.110457	0.366972	0	0.368098	0	0.0903449
K02338 - DNA polymerase III subunit beta [EC:2.7.7.7]	0.0498008	0.0933707	0.0404367	0	0.0489956	0.0433088	0.090009	0.126342	0.10433	0.136924	0.115607	0.124069	0	0	0	0	0	0	0.205903	0.0796178	0.229973	0	0	0.0433088	0.115009	0	0.179104	0.566394	0.301464	0.306748	0.547196	0.0859845	0	0	0	0.0461894	0.135962	0	0.0679348	0.144092	0.107585	0.058072	0	0	0	0.0558971	0.0613497	0	0.089812
K02355 elongation factor G	0	0	0	0	0	0.0433088	0	0	0	0	0	0	0	0	0	0	0.0683995	0	0.274537	0.0796178	0.0383289	0	0.121605	0.303162	0.0575043	0	0	0	0.516796	0.460123	0	0	0	0.684932	0.111794	0	0	0	0.0679348	0	0	0	0.253593	0.257732	0	0	0.429448	0.532725	0.0896154
K00600 - glycine hydroxymethyltransferase [EC:2.1.2.1]	0.0498008	0.0466853	0.0808734	0	0	0.173235	0	0	0.10433	0.136924	0.231214	0.082713	0.175131	0.159617	0.102354	0	0.0683995	0.0623053	0.137268	0.199045	0.0766577	0.238322	0.202675	0.129926	0.115009	0	0.238806	0.0629327	0.129199	0	0	0	0.0834028	0.171233	0.0558971	0.0461894	0.067981	0	0.203804	0	0	0	0.0845309	0.110457	0.0458716	0.0558971	0.0613497	0.304414	0.0894677
K01238 Glycosidases, i.e. enzymes that hydrolyse O- and S-glycosyl compounds	0.0996016	0.0933707	0.0404367	0.132538	0	0.0866176	0.090009	0.126342	0.156495	0.273848	0.192678	0.124069	0.116754	0.0798085	0.153531	0	0.0683995	0.0623053	0.308854	0.437898	0.306631	0.0476644	0.0405351	0.129926	0	0	0.179104	0.0629327	0.0861326	0.0511247	0	0	0.0834028	0	0	0.138568	0	0.100604	0.0679348	0	0.0537924	0.058072	0	0.0368189	0.0458716	0	0	0	0.0860973
K01067 - acetyl-CoA hydrolase [EC:3.1.2.1]	0	0.0466853	0.0404367	0	0.0489956	0.0866176	0	0	0	0.0456413	0	0	0	0.159617	0	0	0.0683995	0.0623053	0.102951	0.0796178	0.191644	0.0476644	0	0	0	0	0	0.314663	0.258398	0.153374	0.615595	0.601892	0.417014	0	0.0558971	0.0461894	0	0	0.13587	0.144092	0	0.058072	0	0.147275	0.137615	0.0558971	0	0	0.0858837
K01596 - phosphoenolpyruvate carboxykinase (GTP) [EC:4.1.1.32]	0.0996016	0	0.12131	0	0.0979912	0.0866176	0	0.0631712	0.0521648	0.0912825	0.0770713	0.0413565	0	0	0	0	0	0	0.171585	0.0398089	0	0.0476644	0.121605	0.0866176	0	0	0.298507	0	0.0861326	0.102249	0.341997	0.687876	0.333611	0.171233	0.111794	0.0923788	0	0	0	0	0.161377	0	0.0845309	0.0736377	0.0917431	0.111794	0.0613497	0.0761035	0.0850868
K01632 - fructose-6-phosphate phosphoketolase [EC:4.1.2.22]	0	0	0	0.132538	0.195982	0.259853	0.270027	0.189514	0.208659	0	0	0	0	0	0	0	0	0	0.137268	0.0398089	0.0383289	0.190658	0.16214	0.0866176	0	0	0	0.251731	0.129199	0.255624	0	0	0	0.0856164	0.111794	0.0923788	0	0	0.13587	0.0720461	0	0.29036	0.169062	0.184094	0.183486	0	0.184049	0	0.0845147
K03781 - catalase [EC:1.11.1.6]	0.149402	0.0933707	0.0404367	0	0.0489956	0.0433088	0	0.189514	0	0.182565	0.346821	0.165426	0.116754	0.0798085	0.102354	0.387973	0.205198	0.124611	0.102951	0.159236	0.114987	0	0	0.0433088	0	0	0.0597015	0.0629327	0.0430663	0	0	0	0.0834028	0	0	0	0.067981	0.201207	0.0679348	0.144092	0.107585	0.174216	0.0845309	0	0	0.167691	0.0613497	0	0.0838065
K00257 - [EC:1.3.99.-]	0.0498008	0.140056	0.12131	0.0662691	0.0489956	0.0433088	0.090009	0	0	0.0456413	0.0385356	0.082713	0	0.0798085	0	0	0	0	0.0343171	0.278662	0.0383289	0.142993	0.0405351	0.129926	0.172513	0	0.298507	0.0629327	0.0861326	0.153374	0.136799	0.0859845	0.0834028	0.342466	0.111794	0.0923788	0.203943	0.201207	0.13587	0	0	0	0	0	0.0458716	0.111794	0.0613497	0.152207	0.0835362
K01676 - fumarate hydratase	0.0996016	0.0466853	0.0404367	0	0.146987	0.0866176	0	0	0	0	0.0385356	0	0	0.0798085	0	0	0	0	0.0686342	0.119427	0.191644	0.0953289	0.0810701	0.0433088	0	0	0	0.251731	0.47373	0.306748	0.889193	0.171969	0.166806	0	0	0.0461894	0	0	0	0	0.0537924	0.058072	0.126796	0.0736377	0.137615	0	0	0	0.0811326
K01197 - hyaluronoglucosaminidase [EC:3.2.1.35]	0	0.140056	0	0.132538	0.0489956	0.129926	0	0.189514	0.0521648	0.182565	0.308285	0.124069	0.233508	0.0798085	0.102354	0.29098	0.273598	0.186916	0.0343171	0.0796178	0.0383289	0	0	0.0433088	0	0.104384	0	0.188798	0.0430663	0.102249	0	0.0859845	0	0.0856164	0.0558971	0.0461894	0.067981	0	0	0	0.430339	0	0	0	0	0	0	0	0.0808616
K01586 - diaminopimelate decarboxylase [EC:4.1.1.20]	0.348606	0.0933707	0.12131	0.132538	0	0.0866176	0.180018	0.0631712	0.10433	0.0456413	0.115607	0.082713	0.233508	0.0798085	0.102354	0.29098	0.0683995	0.124611	0.0343171	0.119427	0.114987	0.0953289	0.121605	0.0866176	0.172513	0.104384	0	0	0.0430663	0.0511247	0	0	0	0.0856164	0	0.0461894	0	0	0	0.216138	0	0.058072	0	0	0	0.0558971	0.122699	0.0761035	0.0807848
K01492 - phosphoribosylaminoimidazolecarboxamide formyltransferase [EC:2.1.2.3]	0.0996016	0.0466853	0.0404367	0.0662691	0.146987	0.0433088	0.270027	0	0	0.0456413	0.0770713	0.082713	0.116754	0.0798085	0.102354	0.0969932	0.0683995	0.0623053	0.137268	0	0	0.0953289	0.24321	0.216544	0	0	0	0	0.0430663	0.0511247	0.0683995	0.171969	0.166806	0	0	0.0461894	0.067981	0.201207	0.0679348	0	0.0537924	0	0.0845309	0	0.0458716	0.167691	0.184049	0.152207	0.0773026
K07231 putative iron-regulated protein	0.0498008	0.140056	0.12131	0	0	0	0.090009	0.252685	0.312989	0.0456413	0.0385356	0.0413565	0	0	0	0.193986	0.0683995	0.0623053	0.0686342	0	0.0766577	0.0476644	0.0405351	0	0.115009	0	0.0597015	0.377596	0.129199	0.153374	0.0683995	0	0	0.0856164	0.111794	0.0923788	0.407886	0	0.0679348	0	0	0.058072	0.0422654	0.0368189	0	0.111794	0.0613497	0.0761035	0.0772054
K01442 - choloylglycine hydrolase [EC:3.5.1.24]	0	0	0	0.331345	0	0	0	0.126342	0.156495	0.0912825	0.0385356	0.082713	0.233508	0.0798085	0.153531	0	0	0.0623053	0.102951	0.119427	0.114987	0	0.121605	0.173235	0	0	0	0	0	0	0	0	0.333611	0.0856164	0.111794	0.184758	0	0	0	0.0720461	0.322754	0.116144	0.380389	0.0368189	0	0	0	0	0.0756667
K01895 - acetyl-CoA synthetase [EC:6.2.1.1]	0.249004	0.140056	0.0808734	0.0662691	0.146987	0.173235	0.090009	0.0631712	0.0521648	0	0.0770713	0.0413565	0	0.0798085	0.0511771	0	0.273598	0	0.102951	0.119427	0.0766577	0	0	0	0.0575043	0.104384	0.119403	0	0	0.0511247	0.0683995	0	0	0	0.111794	0.0461894	0.135962	0.100604	0	0.288184	0.107585	0.29036	0.0845309	0.0368189	0	0.0558971	0	0.0761035	0.0753888
K02004 putative ABC transport system permease protein	0.0498008	0	0.0404367	0	0	0.0433088	0.090009	0.0631712	0.156495	0.0456413	0	0	0.0583771	0.0798085	0.102354	0.387973	1.09439	0.249221	0.0343171	0.0398089	0.0383289	0.0476644	0.0405351	0.0866176	0	0	0	0.0629327	0.215332	0.0511247	0	0	0.0834028	0	0	0	0.067981	0	0	0	0.0537924	0.058072	0	0	0	0.111794	0.122699	0	0.0744873
K03568 TldD protein	0.0498008	0.0466853	0.0808734	0	0	0	0.090009	0.0631712	0.0521648	0	0	0	0.175131	0.319234	0.102354	0.193986	0.341997	0.124611	0.171585	0.238854	0.268302	0	0	0	0.0575043	0.104384	0.119403	0	0	0	0	0	0	0	0.111794	0.0461894	0	0	0	0.216138	0.0537924	0.174216	0.0845309	0.0736377	0.0458716	0.167691	0	0	0.0744565
K02016 - iron complex transport system substrate-binding protein	0.249004	0.186741	0.12131	0	0.0979912	0.0433088	0	0	0	0.0456413	0.192678	0	0.0583771	0.239425	0.102354	0.0969932	0	0	0.24022	0.199045	0.229973	0.0953289	0.0810701	0.0433088	0.0575043	0	0.0597015	0.251731	0.0430663	0	0.0683995	0	0.0834028	0	0	0	0	0.100604	0	0.0720461	0.107585	0.058072	0.126796	0.110457	0.0458716	0	0	0	0.0730835
K00917 - tagatose 6-phosphate kinase [EC:2.7.1.144]	0.149402	0.140056	0.12131	0.132538	0.0489956	0.0866176	0.270027	0.126342	0.0521648	0.0456413	0.0770713	0.124069	0	0	0	0.0969932	0	0.0623053	0.0686342	0.0796178	0.0766577	0.238322	0.202675	0.129926	0	0.104384	0	0	0.0861326	0.102249	0	0	0	0.171233	0.167691	0.138568	0.135962	0	0	0	0	0	0.0845309	0.0368189	0.0917431	0.0558971	0	0	0.0730121
K01761 - methionine-gamma-lyase [EC:4.4.1.11]	0	0.0466853	0.0404367	0	0	0.129926	0.090009	0.126342	0	0.0912825	0.115607	0.082713	0	0	0.0511771	0.0969932	0.0683995	0	0.102951	0.119427	0.0383289	0.0953289	0.121605	0.0866176	0.115009	0.104384	0.119403	0	0	0.204499	0	0	0	0	0.223589	0.230947	0	0.100604	0.271739	0	0	0.058072	0.0422654	0.0736377	0.0917431	0.0558971	0.122699	0.152207	0.0723026
K03118 - sec-independent protein translocase protein TatC	0.0498008	0.0466853	0.0808734	0	0.0489956	0.0433088	0.090009	0.189514	0.156495	0	0	0	0.0583771	0.0798085	0.102354	0	0	0	0.137268	0.0398089	0.0766577	0	0	0	0.0575043	0	0.179104	0	0.0430663	0.0511247	0.410397	0.257954	0.333611	0	0.167691	0.0461894	0	0.201207	0.0679348	0	0.0537924	0	0.0422654	0.0368189	0	0.0558971	0.0613497	0	0.0680388
K01023 aryl-sulfate sulfotransferase	0.199203	0.0933707	0.0808734	0	0	0	0	0	0	0	0	0	0	0	0	0	0	0	0.205903	0.238854	0.34496	0	0	0	0	0	0	0	0.0430663	0.0511247	0	0.171969	0.166806	0	0	0	0	0	0	0.144092	0.268962	0.406504	0	0	0	0.279486	0.245399	0.304414	0.0676039
K03615 electron transport complex protein RnfC	0.0996016	0.0466853	0.0808734	0.0662691	0.146987	0.0866176	0	0	0.10433	0.0912825	0.0770713	0.082713	0.0583771	0	0.35824	0	0	0.0623053	0.0686342	0.119427	0.0766577	0.0476644	0	0	0	0.104384	0.119403	0.125865	0.129199	0.102249	0.0683995	0	0	0	0	0	0.135962	0	0.13587	0	0	0	0	0.0736377	0.183486	0.111794	0.184049	0.0761035	0.0671695
K01186 - sialidase-1 [EC:3.2.1.18]	0.0996016	0	0	0	0	0.0433088	0.090009	0.126342	0.0521648	0.0456413	0.0385356	0	0	0.0798085	0	0.0969932	0.273598	0.124611	0.0686342	0.278662	0.383289	0	0	0	0	0	0	0.0629327	0	0.102249	0	0	0	0	0.111794	0.0923788	0.067981	0.100604	0	0.144092	0.268962	0	0.126796	0.0368189	0.0458716	0.167691	0	0	0.0651952
K01051 - pectinesterase [EC:3.1.1.11]	0	0	0	0	0	0	0	0.126342	0.0521648	0	0	0	0	0	0	0	0	0	0.0343171	0	0	0	0	0	0	0	0	0.377596	0.387597	0.357873	0.205198	0	0	0	0	0	0	0	0	0.576369	0.376547	0.464576	0	0	0	0	0	0	0.0616371
K01790 - dTDP-4-dehydrorhamnose 3	0.0498008	0.0466853	0.0404367	0	0	0	0.090009	0.126342	0.0521648	0.0456413	0.115607	0.082713	0	0	0	0	0	0	0.137268	0.0398089	0.0766577	0	0	0	0.172513	0	0	0	0	0	0.136799	0.171969	0.0834028	0	0	0	0.203943	0.804829	0.203804	0	0	0	0	0	0	0.0558971	0.122699	0.0761035	0.0611478
K00140 - malonate-semialdehyde dehydrogenase (acetylating) / methylmalonate-semialdehyde dehydrogenase [EC:1.2.1.18 1.2.1.27]	0.149402	0.233427	0.0808734	0	0.146987	0.0433088	0	0	0	0.182565	0.154143	0.165426	0	0	0	0	0	0	0.0343171	0.0398089	0	0.0476644	0.121605	0.0866176	0.172513	0.313152	0.238806	0	0	0	0.0683995	0	0	0	0	0	0	0.301811	0	0.0720461	0.0537924	0.116144	0.0422654	0.0368189	0	0	0	0	0.0604561
K00962 - polyribonucleotide nucleotidyltransferase [EC:2.7.7.8]	0	0.140056	0.0404367	0	0	0.0433088	0	0	0	0	0	0.0413565	0.0583771	0	0	0.0969932	0	0.0623053	0.343171	0.0796178	0.0383289	0.0953289	0.24321	0.216544	0.0575043	0	0.119403	0	0.172265	0.255624	0	0.0859845	0	0.171233	0	0	0	0	0	0	0	0	0.211327	0.147275	0.0917431	0.0558971	0	0	0.0597352
K01840 - phosphomannomutase [EC:5.4.2.8]	0	0	0	0	0	0	0	0	0	0	0.0385356	0	0.0583771	0.0798085	0	0	0	0.186916	0.0343171	0.199045	0.0766577	0	0.0405351	0.129926	0.172513	0.104384	0.0597015	0	0.258398	0.306748	0	0	0	0.256849	0.0558971	0	0	0	0	0.216138	0	0	0.169062	0.184094	0.0917431	0	0.0613497	0.0761035	0.0595229
K02358 - elongation factor Tu	0	0.0466853	0	0	0	0	0	0	0	0	0	0	0.0583771	0	0	0	0	0	0.24022	0.0398089	0.114987	0.0476644	0.0405351	0.0866176	0.0575043	0	0.0597015	0.125865	0.301464	0.255624	0	0.171969	0.0834028	0.0856164	0.0558971	0.0461894	0.135962	0	0.0679348	0	0	0	0.126796	0.110457	0	0.167691	0.245399	0.0761035	0.0593432
K01787 - N-acylglucosamine 2-epimerase [EC:5.1.3.8]	0.348606	0.186741	0.0404367	0	0.293974	0.216544	0	0	0.0521648	0.0456413	0.154143	0.124069	0.0583771	0	0.102354	0	0.136799	0.0623053	0.0343171	0.0796178	0.0383289	0	0	0	0.115009	0	0.119403	0	0.0430663	0	0.0683995	0	0	0	0	0	0.067981	0	0	0.0720461	0.107585	0.058072	0.0845309	0.0736377	0.0458716	0	0	0	0.0589587
K00175 - 2-oxoglutarate ferredoxin oxidoreductase subunit beta [EC:1.2.7.3]	0.0996016	0	0.0404367	0	0	0.0866176	0	0.189514	0	0.273848	0.192678	0.082713	0	0.239425	0.102354	0	0.136799	0.124611	0.102951	0.119427	0.229973	0	0.0405351	0.0433088	0	0	0	0	0	0	0	0	0	0	0.0558971	0.0461894	0	0	0	0.144092	0.107585	0.29036	0	0.0736377	0	0	0	0	0.0588032
K01218 - mannan endo-1,4-beta-mannosidase [EC:3.2.1.78]	0.0498008	0.0466853	0.0404367	0	0.0489956	0.0866176	0	0	0.10433	0	0.0385356	0.0413565	0.0583771	0.239425	0.35824	0	0	0	0.0343171	0.119427	0.114987	0	0	0	0.172513	0	0.179104	0	0	0	0	0	0	0	0	0.0461894	0.135962	0.402414	0	0	0.0537924	0	0.0845309	0.110457	0.0917431	0.111794	0	0	0.057709
K01201 - glucosylceramidase [EC:3.2.1.45]	0	0	0	0.0662691	0.195982	0.173235	0	0	0	0	0	0.0413565	0	0.0798085	0	0	0.0683995	0	0.0686342	0	0.191644	0	0	0	0	0	0	0.251731	0.258398	0.204499	0	0	0.333611	0	0.167691	0.0923788	0.067981	0	0.0679348	0.144092	0	0.058072	0.0845309	0.110457	0	0	0	0	0.0568064
K00041 - tagaturonate reductase [EC:1.1.1.58]	0	0.0933707	0	0	0	0	0	0	0	0	0	0.0413565	0	0	0	0	0	0	0.0343171	0	0.0766577	0	0	0.0433088	0.115009	0	0.179104	0.125865	0.387597	0.357873	0	0	0	0.0856164	0.111794	0	0	0	0.0679348	0.0720461	0.0537924	0	0.422654	0.184094	0.0917431	0.0558971	0.122699	0	0.0567236
K08289 - phosphoribosylglycinamide formyltransferase 2 [EC:2.1.2.2]	0	0.0933707	0.0404367	0	0	0.0866176	0	0.0631712	0	0	0	0.0413565	0.175131	0.0798085	0	0	0	0.0623053	0.137268	0.238854	0.306631	0.0476644	0.0405351	0.0433088	0.287522	0	0.119403	0	0.172265	0.153374	0	0	0	0	0	0	0.271924	0.100604	0	0	0	0	0	0	0	0.0558971	0.0613497	0	0.0558083
K00281 - glycine dehydrogenase [EC:1.4.4.2]	0	0	0	0	0.0489956	0.0433088	0.090009	0.126342	0.0521648	0.0456413	0.0770713	0	0.0583771	0	0	0.29098	0.957592	0.249221	0.0343171	0.0398089	0.114987	0	0	0	0	0	0	0.125865	0	0	0	0	0	0	0	0	0	0	0.0679348	0	0	0.174216	0	0	0	0.0558971	0	0	0.0552652
K04077 - chaperonin GroEL	0	0	0	0	0	0	0	0	0	0	0	0	0.0583771	0	0	0	0	0	0.171585	0	0.153315	0	0	0	0.345026	0	0.119403	0	0.215332	0.153374	0	0	0	0	0	0	0	0	0	0	0	0	0.676247	0.552283	0	0	0.122699	0	0.0534925
K00378	0.0498008	0.0466853	0.0404367	0	0	0.216544	0.090009	0	0.0521648	0.0456413	0.0770713	0.082713	0	0.0798085	0.0511771	0	0	0	0.0343171	0.0398089	0	0.238322	0.24321	0.129926	0	0	0.119403	0	0	0	0.136799	0	0.0834028	0.0856164	0.167691	0.0461894	0	0	0	0	0.0537924	0	0.0422654	0	0.183486	0.111794	0	0	0.0530849
K01423 - [EC:3.4.-.-]	0.0996016	0.186741	0.161747	0.198807	0.0489956	0	0	0	0.0521648	0.228206	0.0770713	0.124069	0	0.0798085	0	0	0.0683995	0.0623053	0.0686342	0.0398089	0.191644	0	0	0	0	0	0	0.125865	0.0430663	0	0	0	0	0.171233	0.0558971	0.0923788	0.067981	0	0.0679348	0	0.0537924	0	0	0	0	0.0558971	0	0	0.0504594
K01703 - 3-isopropylmalate/(R)-2-methylmalate dehydratase large subunit [EC:4.2.1.33 4.2.1.35]	0	0.0933707	0.161747	0	0	0	0.090009	0.0631712	0.0521648	0.136924	0.231214	0.0413565	0.0583771	0.239425	0.0511771	0	0	0	0.0686342	0	0	0.0476644	0.121605	0.0866176	0.0575043	0.104384	0.0597015	0	0.0430663	0.0511247	0.136799	0	0	0	0	0	0	0.100604	0.0679348	0	0	0	0	0	0	0	0.0613497	0.0761035	0.0479589
K00074 - 3-hydroxybutyryl-CoA dehydrogenase [EC:1.1.1.157]	0.0996016	0	0.0808734	0	0	0.173235	0	0	0.10433	0.0456413	0	0.082713	0	0.159617	0	0	0	0	0.171585	0	0	0.0476644	0.16214	0.0433088	0	0	0	0	0	0	0	0.429923	0.417014	0	0	0	0	0	0	0	0	0	0.211327	0.0368189	0	0	0	0	0.047204
K01966 - propionyl-CoA carboxylase beta chain [EC:6.4.1.3]	0	0	0	0	0	0	0	0	0	0	0	0	0	0	0	0	0	0	0.24022	0.119427	0.421617	0	0	0.129926	0	0	0.0597015	0	0.258398	0.0511247	0	0.257954	0.166806	0	0	0	0.067981	0	0	0	0	0	0.211327	0.110457	0	0	0.0613497	0.0761035	0.0465082
K00340 - NADH-quinone oxidoreductase subunit K [EC:1.6.5.3]	0.298805	0.140056	0.12131	0	0	0	0	0	0	0	0	0	0	0.0798085	0	0	0	0	0	0	0	0	0.0405351	0.0433088	0	0	0	0	0.0861326	0	0	0	0	0	0	0	0.067981	0.402414	0.271739	0.144092	0.107585	0.058072	0.253593	0	0	0	0	0	0.0440715
K01775 - alanine racemase [EC:5.1.1.1]	0	0	0	0	0	0	0	0	0	0.182565	0.154143	0.206782	0	0	0	0	0	0	0.0686342	0.0796178	0.0766577	0	0	0	0.115009	0	0.0597015	0	0.0430663	0.102249	0.273598	0	0.0834028	0.0856164	0.0558971	0.0461894	0	0.201207	0	0.0720461	0.107585	0	0	0	0	0	0	0.0761035	0.0435431
K02390 - flagellar hook protein FlgE	0	0	0.0808734	0.132538	0.195982	0.303162	0	0	0.0521648	0.0456413	0.0385356	0	0.0583771	0	0	0	0	0	0.137268	0	0.0383289	0.238322	0.16214	0.216544	0	0.104384	0	0	0	0	0	0	0.0834028	0	0.0558971	0	0.067981	0	0	0	0	0	0	0	0.0458716	0	0	0	0.0428628
K00086 - 1,3-propanediol dehydrogenase [EC:1.1.1.202]	0.149402	0.0933707	0.0404367	0	0	0	0	0.0631712	0.10433	0.136924	0.0770713	0.206782	0	0.0798085	0	0.0969932	0.0683995	0.0623053	0	0.0796178	0	0	0	0.0433088	0.115009	0	0.0597015	0.0629327	0	0.0511247	0	0	0.0834028	0	0	0	0	0	0	0.0720461	0.0537924	0	0	0	0	0.111794	0	0.0761035	0.0414131
K02503 histidine triad (HIT) family protein	0	0	0	0	0	0	0	0	0	0	0.0770713	0	0	0.159617	0	0	0.0683995	0	0	0	0	0	0	0	0	0	0	0.188798	0.0861326	0	0.341997	0.515907	0.500417	0	0	0	0	0	0	0	0	0	0	0	0.0458716	0	0	0	0.0413377
K01845 - glutamate-1-semialdehyde 2	0.0996016	0	0	0	0	0	0.090009	0.0631712	0.365154	0	0.0385356	0.124069	0	0.0798085	0.153531	0.29098	0	0.0623053	0.0686342	0.119427	0.114987	0	0	0	0.0575043	0.104384	0	0	0	0	0	0	0	0	0	0.0461894	0	0	0.0679348	0	0	0	0	0.0368189	0	0	0	0	0.0413134
K01880 - glycyl-tRNA synthetase [EC:6.1.1.14]	0	0	0	0	0	0.129926	0	0	0	0	0	0	0	0	0	0	0	0	0.137268	0.0398089	0.0383289	0.142993	0.121605	0.0866176	0	0	0	0	0.129199	0.153374	0	0	0	0.0856164	0.223589	0.230947	0.135962	0.100604	0	0	0	0	0	0.0736377	0.0917431	0	0.0613497	0	0.0413035
K05366 - penicillin-binding protein 1A [EC:2.4.1.- 3.4.-.-]	0	0	0	0	0.0489956	0.0866176	0	0	0	0	0.0385356	0	0	0	0.0511771	0	0	0	0.0686342	0	0.0383289	0.142993	0.324281	0.259853	0	0	0.0597015	0	0	0	0	0	0	0	0	0.0923788	0.067981	0.100604	0.0679348	0	0	0	0.0845309	0.0368189	0.0458716	0.0558971	0.245399	0	0.0399278
K13378 - NADH-quinone oxidoreductase subunit C/D [EC:1.6.5.3]	0	0.0466853	0	0	0	0	0	0	0	0	0	0	0.0583771	0.0798085	0.0511771	0.193986	0	0	0	0	0	0	0	0	0	0	0	0.0629327	0.0861326	0.102249	0	0	0	0.428082	0.279486	0.461894	0	0	0	0	0	0	0	0	0	0.0558971	0	0	0.0397231
K02481 two-component system, NtrC family, response regulator	0	0	0	0	0	0	0.090009	0	0	0	0	0	0	0	0	0.581959	0.478796	0.560748	0	0	0	0	0	0	0	0	0	0	0	0	0	0	0	0	0	0	0	0	0	0.0720461	0.107585	0	0	0	0	0	0	0	0.0393988
K12940 aminobenzoyl-glutamate utilization protein A	0	0.0466853	0.0404367	0	0.0489956	0	0	0	0	0.0456413	0	0.082713	0	0	0	0.0969932	0.0683995	0.0623053	0.102951	0.119427	0.229973	0	0	0	0	0	0	0.188798	0.0430663	0.102249	0	0	0	0	0	0	0	0	0	0	0.107585	0.174216	0	0	0.0458716	0.223589	0	0	0.0381228
K01580 - glutamate decarboxylase [EC:4.1.1.15]	0.0498008	0	0	0	0	0	0	0.252685	0.0521648	0	0	0.082713	0	0	0	0	0	0	0.205903	0	0	0	0.0405351	0.129926	0.115009	0	0.298507	0	0	0	0	0	0	0	0.0558971	0	0.203943	0	0	0	0	0	0	0	0	0.111794	0.122699	0.0761035	0.0374517
K06975	0	0	0	0	0	0	0	0	0	0.0456413	0.231214	0	0	0	0	0	0.273598	0.186916	0	0	0	0	0	0	0	0	0	0	0.0861326	0.0511247	0.0683995	0.171969	0.166806	0	0	0	0	0.201207	0.13587	0	0	0	0.0845309	0.0368189	0	0.0558971	0	0	0.0374193
K01876 - aspartyl-tRNA synthetase [EC:6.1.1.12]	0	0	0	0.0662691	0	0	0	0	0	0	0	0	0.0583771	0	0.0511771	0	0	0	0.0686342	0.636943	0.268302	0.0953289	0.0405351	0.0433088	0	0	0	0	0	0.0511247	0	0	0	0	0.0558971	0.0923788	0	0	0	0	0	0	0	0.110457	0.0458716	0	0	0	0.0350959
K01295 glutamate carboxypeptidase [EC:3.4.17.11]	0	0	0	0.265076	0.293974	0.129926	0.180018	0.0631712	0	0	0	0	0	0.0798085	0.102354	0	0	0.0623053	0	0	0	0	0.0405351	0	0	0	0	0	0	0	0.0683995	0	0	0	0.167691	0.230947	0	0	0	0	0	0	0	0	0	0	0	0	0.0350876
K00548 - 5-methyltetrahydrofolate--homocysteine methyltransferase [EC:2.1.1.13]	0	0.0466853	0	0	0	0	0	0	0	0	0.0770713	0	0	0	0	0.0969932	0.0683995	0	0.0343171	0	0.0766577	0	0	0	0	0	0	0	0	0	0	0	0	0	0	0	0.067981	0.704225	0.203804	0.0720461	0.161377	0.058072	0	0	0	0	0	0	0.0347423
K00833 - adenosylmethionine-8-amino-7-oxononanoate aminotransferase [EC:2.6.1.62]	0	0.0466853	0	0.0662691	0.0489956	0	0	0	0	0.0456413	0.0385356	0.0413565	0	0	0	0.484966	0.136799	0.249221	0.0686342	0.0398089	0.0766577	0	0	0	0.0575043	0	0	0	0	0	0	0	0	0.0856164	0.0558971	0	0.067981	0	0	0	0	0	0	0	0	0	0	0	0.0335535
K01803 - triosephosphate isomerase (TIM) [EC:5.3.1.1]	0.0498008	0.0466853	0.0808734	0	0.0489956	0.0433088	0	0	0	0	0.0770713	0	0	0	0	0	0	0	0.102951	0	0.153315	0	0	0	0	0	0.119403	0.0629327	0.258398	0.102249	0	0.0859845	0.0834028	0	0	0.0923788	0	0	0	0	0.0537924	0.058072	0.0422654	0.0368189	0	0	0	0	0.0333062
K03499 trk system potassium uptake protein TrkA	0	0	0	0	0	0	0.090009	0.126342	0.156495	0	0.0385356	0	0	0	0	0	0	0	0.102951	0.199045	0.268302	0	0.0810701	0	0.0575043	0	0	0	0	0	0	0	0	0	0	0	0.067981	0	0.13587	0	0	0	0	0.110457	0	0	0	0	0.0298867
K02025 multiple sugar transport system permease protein	0	0	0	0.198807	0.146987	0.389779	0	0	0	0	0	0	0	0	0	0	0	0	0	0	0	0	0	0	0.0575043	0	0.0597015	0	0	0	0	0	0	0.171233	0	0	0.067981	0	0	0	0	0	0	0.110457	0.229358	0	0	0	0.0298293
K00864 - glycerol kinase [EC:2.7.1.30]	0	0	0	0	0	0	0	0	0	0	0	0	0	0	0	0	0	0	0	0	0	0	0.0405351	0.0866176	0	0	0.0597015	0	0.258398	0.102249	0	0	0	0	0	0	0	0	0.203804	0	0	0	0.0422654	0.0736377	0.137615	0.0558971	0.122699	0.228311	0.0294111
K10254 oleate hydratase [EC:4.2.1.53]	0.0498008	0.0466853	0.0404367	0	0	0.0433088	0	0	0	0	0	0.0413565	0	0	0	0	0	0	0.137268	0.119427	0.114987	0	0	0.0433088	0	0	0.0597015	0	0.215332	0.0511247	0	0	0	0	0	0.0461894	0.067981	0	0	0	0	0	0.0422654	0	0.0917431	0.0558971	0	0	0.0263919
K01652 - acetolactate synthase I/II/III large subunit [EC:2.2.1.6]	0	0.0933707	0	0	0	0	0	0	0	0	0	0	0	0	0	0	0	0	0	0	0	0	0	0	0	0	0	0.0629327	0.258398	0.204499	0.0683995	0	0	0	0	0	0	0	0	0	0	0	0.169062	0.0736377	0.0917431	0.167691	0	0	0.0247861
K01992 ABC-2 type transport system permease protein	0	0	0	0	0	0	0	0	0	0	0	0	0.0583771	0.159617	0	0.193986	0.341997	0.124611	0	0	0.0383289	0	0	0	0	0	0	0	0	0	0	0	0	0	0	0	0	0.100604	0	0	0.161377	0	0	0	0	0	0	0	0.0245604
K13607 - cinnamoyl-CoA:phenyllactate CoA-transferase [EC:2.8.3.17]	0	0	0	0	0	0	0	0	0	0	0	0	0	0	0	0	0	0	0	0	0	0	0	0	0.0575043	0.104384	0	0	0	0	0	0	0	0	0	0	0	0	0.0679348	0	0	0	0	0	0	0.279486	0.429448	0.228311	0.0243139
K00701 cyclomaltodextrin glucanotransferase [EC:2.4.1.19]	0	0	0	0	0	0	0	0	0	0	0	0	0.116754	0	0	0	0	0	0.0343171	0	0	0.238322	0.0810701	0.259853	0	0	0	0	0	0	0	0	0	0	0	0.230947	0.203943	0	0	0	0	0	0	0	0	0	0	0	0.0242751
K01937 - CTP synthase [EC:6.3.4.2]	0	0	0	0	0	0	0	0	0	0	0	0	0	0.159617	0	0	0	0	0	0	0	0	0	0	0	0	0	0	0.215332	0.102249	0.136799	0.0859845	0.166806	0	0	0	0	0	0	0	0	0	0.0845309	0.0736377	0.0458716	0	0	0	0.0223089
K02082 tagatose-6-phosphate ketose/aldose isomerase [EC:5.-.-.-]	0	0	0	0	0	0	0	0	0	0	0	0	0	0	0	0	0	0	0	0	0	0	0.0405351	0.34647	0	0	0	0	0.0430663	0.102249	0	0	0	0.0856164	0.111794	0.0461894	0	0	0	0	0	0	0.169062	0	0.0458716	0	0	0	0.0206428
K00876 - uridine kinase [EC:2.7.1.48]	0	0	0	0	0	0	0	0	0	0	0	0	0	0	0	0	0	0.0623053	0.102951	0.119427	0.229973	0	0	0	0	0	0	0	0.129199	0	0.0683995	0.0859845	0.0834028	0	0	0	0	0	0	0.0720461	0	0	0	0.0368189	0	0	0	0	0.0206356
K00339 - NADH-quinone oxidoreductase subunit J [EC:1.6.5.3]	0	0	0	0	0	0	0	0	0	0	0	0	0	0.0798085	0.102354	0.0969932	0.341997	0.0623053	0	0	0	0.0476644	0.0405351	0	0	0	0	0	0.0430663	0	0	0	0	0	0	0	0	0.100604	0.0679348	0	0	0	0	0	0	0	0	0	0.0204846
K01714 - dihydrodipicolinate synthase [EC:4.2.1.52]	0.199203	0.0466853	0.0808734	0	0	0.0866176	0	0	0	0.0456413	0	0	0	0	0	0	0	0.124611	0	0	0	0	0	0	0	0	0	0	0	0	0	0	0	0	0	0	0	0	0	0	0	0	0.338123	0	0	0	0	0	0.0192032
K10670 glycine reductase [EC:1.21.4.2]	0	0	0	0	0	0	0	0	0	0	0	0	0	0	0	0	0	0	0.0343171	0.0398089	0	0.0953289	0.0405351	0.216544	0	0	0	0	0.0430663	0	0	0	0	0	0.111794	0.138568	0	0	0	0	0	0	0	0.0736377	0.0458716	0	0	0.0761035	0.0190745
K02433 - aspartyl-tRNA(Asn)/glutamyl-tRNA (Gln) amidotransferase subunit A [EC:6.3.5.6 6.3.5.7]	0	0	0	0.0662691	0.0489956	0	0	0	0.0521648	0.0912825	0.192678	0.082713	0.0583771	0	0.0511771	0	0	0	0	0.0398089	0	0	0.0405351	0.0433088	0	0	0	0.0629327	0	0	0	0	0	0	0	0.0461894	0	0	0	0	0	0	0	0	0	0	0	0	0.018259
K13929 malonate decarboxylase alpha subunit [EC:2.3.1.187]	0	0	0	0	0	0	0	0	0	0	0	0	0	0	0	0	0	0	0	0	0.0383289	0	0	0	0	0	0	0	0	0	0.136799	0.429923	0.166806	0	0	0	0	0	0	0	0	0	0	0	0	0	0	0	0.0160803
K09704 hypothetical protein	0.0498008	0	0	0	0.0489956	0	0	0	0	0	0	0	0	0	0	0	0.205198	0.0623053	0.0343171	0.0398089	0.191644	0	0	0	0	0	0	0	0	0	0.0683995	0	0	0	0	0	0	0	0	0	0	0	0	0	0	0	0	0	0.0145931
K01448 N-acetylmuramoyl-L-alanine amidase [EC:3.5.1.28]	0	0.0466853	0	0	0	0	0	0	0	0.0456413	0	0	0	0	0	0	0	0	0.137268	0.0796178	0.229973	0	0	0	0	0	0	0	0	0	0	0	0	0	0	0	0	0	0	0	0.107585	0	0	0	0	0	0	0	0.0134744
K02804 - PTS system	0	0	0	0	0	0	0	0	0	0	0	0	0	0	0.0511771	0	0	0	0	0	0.0383289	0	0	0	0	0	0	0.0629327	0.301464	0.0511247	0	0	0	0	0	0.138568	0	0	0	0	0	0	0	0	0	0	0	0	0.0134082
K04079 - molecular chaperone HtpG	0	0	0	0	0	0	0	0	0	0	0	0	0	0	0	0	0	0	0.0343171	0	0	0	0	0	0	0	0	0	0	0.0511247	0	0	0	0	0.0558971	0	0	0	0	0	0	0	0.126796	0.184094	0.0458716	0	0.0613497	0.0761035	0.0132407
K00652 - 8-amino-7-oxononanoate synthase [EC:2.3.1.47]	0	0	0	0	0	0	0	0	0	0	0	0	0	0	0	0	0	0	0	0	0	0	0	0	0	0	0	0	0.129199	0	0.410397	0	0	0	0	0	0	0	0	0	0	0	0	0.0368189	0.0458716	0	0	0	0.0129643
K01567 E3.-.-.-	0.0498008	0	0	0	0	0	0	0	0	0	0	0	0	0	0	0	0	0	0	0	0.191644	0	0	0	0	0	0	0	0	0	0	0	0	0	0	0	0.067981	0	0	0	0	0.058072	0.0422654	0.0368189	0	0	0	0	0.0093038
K00394 - adenylylsulfate reductase	0	0	0	0	0	0	0	0	0	0	0	0	0	0	0	0	0	0	0.171585	0.119427	0.153315	0	0	0	0	0	0	0	0	0	0	0	0	0	0	0	0	0	0	0	0	0	0	0	0	0	0	0	0.00925683
K01951 - GMP synthase (glutamine-hydrolysing) [EC:6.3.5.2]	0	0	0	0	0	0	0	0	0	0.0456413	0	0	0	0	0	0	0	0	0	0	0	0	0	0	0	0	0	0	0	0.0511247	0	0	0	0	0	0	0	0	0	0	0	0	0	0.184094	0	0	0	0	0.00585125
[truncated: 2 more columns]

## Sheet: ALL bacterial KOs MSMS
KO	Function	Gene	104-1	104-2	104-3	106-1	106-2	106-3	107-1	107-2	107-3	112-1	112-2	112-3	116-1	116-2	116-3	119-1	119-2	119-3	122-1	122-2	122-3	124-1	124-2	124-3	127-1	127-2	127-3	130-1	130-2	130-3	135-1	135-2	135-3	137-1	137-2	137-3	147-1	147-2	147-3	155-1	155-2	155-3	162-1	162-2	162-3	163-1	163-2
K01358	Cellular Processes, Cell Growth and Death, Cell cycle - Caulobacter, K01358 - ATP-dependent Clp protease	clpP, CLPP; ATP-dependent Clp protease, protease subunit [EC:3.4.21.92]	0	1	0	0	0	0	0	0	1	0	0	0	0	0	0	0	0	0	0	0	0	0	0	0	0	0	0	0	0	0	0	0	0	0	0	0	0	0	0	0	0	0	0	0	0	0	0
K03531	Cellular Processes, Cell Growth and Death, Cell cycle - Caulobacter, K03531 - cell division protein FtsZ	ftsZ; cell division protein FtsZ	0	0	0	0	0	0	0	0	0	0	0	0	0	0	0	0	0	0	0	0	0	0	0	0	1	0	0	0	0	0	0	0	0	0	0	0	0	0	0	0	0	0	0	0	0	1	1
K03544	Cellular Processes, Cell Growth and Death, Cell cycle - Caulobacter, K03544 - ATP-dependent Clp protease ATP-binding subunit ClpX	clpX, CLPX; ATP-dependent Clp protease ATP-binding subunit ClpX	0	0	0	0	0	0	0	0	0	0	0	0	0	0	0	0	0	0	0	0	0	0	0	0	0	0	0	0	0	0	0	0	0	0	0	0	0	0	0	0	0	1	0	0	0	0	0
K13069	Cellular Processes, Cell Growth and Death, Cell cycle - Caulobacter, K13069 - diguanylate cyclase	NA	0	0	0	0	0	0	0	0	0	0	0	0	0	0	0	0	0	0	0	0	0	0	0	0	0	0	0	0	0	0	0	1	1	0	0	0	0	0	0	0	0	0	0	0	0	0	0
K02557	Cellular Processes, Cell Motility, Bacterial chemotaxis, K02557 - chemotaxis protein MotB	motB; chemotaxis protein MotB	0	0	0	0	0	0	0	0	0	0	0	0	0	0	0	0	0	0	0	0	0	0	0	0	0	0	0	0	1	0	0	2	2	0	0	0	0	0	0	0	0	0	0	0	0	0	0
K02389	Cellular Processes, Cell Motility, Flagellar assembly, K02389 - flagellar basal-body rod modification protein FlgD	flgD; flagellar basal-body rod modification protein FlgD	0	0	0	0	0	0	0	0	0	0	0	0	0	0	0	0	0	0	0	0	0	0	0	0	0	0	0	0	0	0	1	0	0	0	0	0	0	0	0	0	0	0	0	0	0	0	0
K02390	Cellular Processes, Cell Motility, Flagellar assembly, K02390 - flagellar hook protein FlgE	flgE; flagellar hook protein FlgE	0	0	2	2	4	7	0	0	1	1	1	0	1	0	0	0	0	0	4	0	1	5	4	5	0	1	0	0	0	0	0	0	1	0	1	0	1	0	0	0	0	0	0	0	1	0	0
K02398	Cellular Processes, Cell Motility, Flagellar assembly, K02398 - negative regulator of flagellin synthesis FlgM	flgM; negative regulator of flagellin synthesis FlgM	0	0	0	0	0	0	0	0	0	0	0	0	0	0	0	0	0	0	0	0	0	0	0	0	0	0	0	0	0	0	0	0	1	0	0	0	0	0	0	0	0	0	0	0	0	0	0
K02412	Cellular Processes, Cell Motility, Flagellar assembly, K02412 - flagellum-specific ATP synthase [EC:3.6.3.14]	fliI; flagellum-specific ATP synthase [EC:3.6.3.14]	0	0	2	1	0	0	0	0	0	0	0	0	0	0	0	0	0	0	0	0	0	0	0	0	1	0	0	0	0	0	0	1	0	0	0	0	0	0	0	0	0	1	0	1	0	1	0
K02413	Cellular Processes, Cell Motility, Flagellar assembly, K02413 - flagellar FliJ protein	fliJ; flagellar FliJ protein	0	0	0	0	0	0	0	0	0	0	0	0	0	0	0	0	0	0	0	0	0	0	0	0	0	0	0	0	0	0	1	0	0	0	0	0	0	0	0	0	0	0	0	0	0	0	0
K02414	Cellular Processes, Cell Motility, Flagellar assembly, K02414 - flagellar hook-length control protein FliK	fliK; flagellar hook-length control protein FliK	0	0	0	0	0	0	0	0	0	0	0	1	0	0	0	0	0	0	0	0	1	0	0	0	0	0	0	0	0	0	0	0	0	0	0	0	0	0	1	0	0	0	0	0	0	0	0
K02422	Cellular Processes, Cell Motility, Flagellar assembly, K02422 - flagellar protein FliS	fliS; flagellar protein FliS	0	0	0	0	0	0	0	0	0	0	0	0	0	0	0	0	0	0	0	0	0	0	0	0	0	0	1	0	0	0	0	0	0	0	0	0	0	0	0	0	0	0	0	0	0	0	0
K04564	Cellular Processes, Transport and Catabolism, Peroxisome, K04564 - superoxide dismutase	SOD2; superoxide dismutase, Fe-Mn family [EC:1.15.1.1]	0	0	0	0	0	0	0	0	0	0	0	0	0	0	0	0	0	0	0	0	0	0	0	0	0	0	0	0	0	0	0	0	1	0	0	0	0	0	0	0	0	0	0	0	0	0	0
K01999	Environmental Information Processing, Membrane Transport, ABC transporters, K01999 - branched-chain amino acid transport system substrate-binding protein	livK; branched-chain amino acid transport system substrate-binding protein	11	10	14	10	15	14	7	7	8	9	4	8	6	10	10	5	4	5	13	10	10	6	3	2	7	7	6	11	6	6	8	1	3	3	2	5	3	1	6	4	1	1	9	5	3	5	3
K02006	Environmental Information Processing, Membrane Transport, ABC transporters, K02006 - cobalt/nickel transport system ATP-binding protein	cbiO; cobalt/nickel transport system ATP-binding protein	0	0	0	0	0	0	0	0	1	1	2	1	0	0	0	1	1	1	0	0	0	1	1	0	0	0	0	0	0	0	0	0	0	0	0	0	0	0	0	0	0	0	0	0	0	0	1
K02012	Environmental Information Processing, Membrane Transport, ABC transporters, K02012 - iron(III) transport system substrate-binding protein	afuA, fbpA; iron(III) transport system substrate-binding protein	1	2	3	1	2	2	1	0	2	0	0	0	4	1	4	0	0	3	3	1	2	5	3	2	2	1	3	1	2	0	1	0	0	5	2	3	1	2	2	4	2	4	6	6	2	5	2
K02013	Environmental Information Processing, Membrane Transport, ABC transporters, K02013 - iron complex transport system ATP-binding protein [EC:3.6.3.34]	ABC.FEV.A; iron complex transport system ATP-binding protein [EC:3.6.3.34]	1	0	0	0	0	0	0	0	0	0	0	0	0	0	0	1	2	0	0	0	0	0	0	0	0	0	0	0	0	0	0	0	0	0	0	0	0	0	0	0	1	2	0	0	0	0	0
K02015	Environmental Information Processing, Membrane Transport, ABC transporters, K02015 - iron complex transport system permease protein	ABC.FEV.P; iron complex transport system permease protein	0	0	0	0	1	0	0	0	0	0	0	0	0	0	0	0	0	0	0	0	0	0	0	0	0	0	0	0	0	0	0	0	0	0	0	1	0	0	0	0	0	0	0	0	0	0	0
K02016	Environmental Information Processing, Membrane Transport, ABC transporters, K02016 - iron complex transport system substrate-binding protein	ABC.FEV.S; iron complex transport system substrate-binding protein	5	4	3	0	2	1	0	0	0	1	5	0	1	3	2	1	0	0	7	5	6	2	2	1	1	0	1	4	1	0	1	0	1	0	0	0	0	1	0	1	2	1	3	3	1	0	0
K02040	Environmental Information Processing, Membrane Transport, ABC transporters, K02040 - phosphate transport system substrate-binding protein	pstS; phosphate transport system substrate-binding protein	2	0	0	0	0	0	1	0	0	0	1	1	4	1	3	0	0	0	0	0	2	0	0	0	0	0	0	0	0	0	0	0	0	0	0	0	0	0	0	0	0	0	0	0	0	0	0
K02044	Environmental Information Processing, Membrane Transport, ABC transporters, K02044 - phosphonate transport system substrate-binding protein	phnD; phosphonate transport system substrate-binding protein	0	0	0	0	0	0	0	0	0	0	0	0	0	0	0	0	0	0	0	0	0	0	0	0	0	0	0	0	0	0	0	0	0	1	0	0	0	0	0	0	0	0	0	0	0	0	0
K02047	Environmental Information Processing, Membrane Transport, ABC transporters, K02047 - sulfate transport system permease protein	cysW; sulfate transport system permease protein	0	0	0	0	0	0	0	0	0	0	0	0	0	0	0	0	0	0	0	0	0	0	1	0	0	0	0	0	0	0	0	0	0	0	0	0	0	0	0	0	0	0	0	0	0	0	0
K02071	Environmental Information Processing, Membrane Transport, ABC transporters, K02071 - D-methionine transport system ATP-binding protein	metN; D-methionine transport system ATP-binding protein	0	0	0	0	0	0	0	0	0	0	0	0	0	0	0	0	0	0	0	0	0	0	0	0	0	0	0	0	0	0	0	0	0	0	0	0	0	0	0	0	0	0	0	0	0	0	1
K02073	Environmental Information Processing, Membrane Transport, ABC transporters, K02073 - D-methionine transport system substrate-binding protein	metQ; D-methionine transport system substrate-binding protein	1	0	0	2	2	1	2	1	0	0	0	0	0	1	0	0	0	0	1	0	2	0	0	0	0	2	0	1	0	0	0	0	0	0	0	0	0	0	0	0	0	1	1	0	0	0	0
K02195	Environmental Information Processing, Membrane Transport, ABC transporters, K02195 - heme exporter protein C	ccmC; heme exporter protein C	0	0	0	0	0	0	0	0	0	0	0	0	0	0	0	0	0	0	0	0	0	0	0	0	0	0	0	0	0	0	0	0	0	0	0	0	0	0	0	0	0	0	0	0	1	0	0
K05813	Environmental Information Processing, Membrane Transport, ABC transporters, K05813 - sn-glycerol 3-phosphate transport system substrate-binding protein	ugpB; sn-glycerol 3-phosphate transport system substrate-binding protein	9	9	9	4	8	6	5	5	7	8	6	6	4	4	6	4	6	7	3	6	9	4	4	6	5	9	6	5	5	6	2	2	3	4	4	5	4	6	9	3	6	3	6	5	6	6	5
K06726	Environmental Information Processing, Membrane Transport, ABC transporters, K06726 - D-ribose pyranase [EC:5.-.-.-]	rbsD; D-ribose pyranase [EC:5.4.99.62]	0	1	1	0	0	0	0	1	1	0	0	0	0	0	0	0	0	0	0	0	0	0	0	0	0	0	0	0	0	0	0	1	0	0	0	0	0	0	0	0	1	0	0	0	0	2	0
K06858	Environmental Information Processing, Membrane Transport, ABC transporters, K06858 - vitamin B12 transport system substrate-binding protein	ABC.VB12.S1, btuF; vitamin B12 transport system substrate-binding protein	0	0	0	0	0	0	0	0	0	0	0	0	0	0	0	0	0	0	0	0	0	0	0	0	1	0	0	0	0	0	0	0	0	0	0	0	0	0	0	0	0	0	0	0	0	0	0
K09686	Environmental Information Processing, Membrane Transport, ABC transporters, K09686 - antibiotic transport system permease protein	NA	0	0	0	0	0	0	0	0	0	0	0	0	0	0	0	0	0	0	0	0	0	0	0	0	0	0	0	0	0	0	0	0	0	0	0	0	0	0	0	0	1	0	0	0	0	0	0
K09687	Environmental Information Processing, Membrane Transport, ABC transporters, K09687 - antibiotic transport system ATP-binding protein	NA	0	0	0	0	0	0	0	0	0	1	0	0	0	0	0	0	0	0	0	0	0	0	0	0	0	0	0	0	0	0	0	0	0	0	0	0	0	0	0	0	0	0	0	0	0	0	0
K09811	Environmental Information Processing, Membrane Transport, ABC transporters, K09811 - cell division transport system permease protein	ftsX; cell division transport system permease protein	0	0	0	0	0	0	0	0	0	0	0	0	0	0	0	0	0	0	1	0	0	0	0	0	0	0	0	0	0	0	0	0	0	0	0	0	0	0	0	0	0	0	0	0	0	0	0
K09815	Environmental Information Processing, Membrane Transport, ABC transporters, K09815 - zinc transport system substrate-binding protein	znuA; zinc transport system substrate-binding protein	0	0	0	0	0	0	0	0	0	0	0	0	0	0	0	0	1	0	0	0	0	0	0	0	0	0	0	0	0	0	0	0	0	0	0	0	0	0	0	0	0	0	0	0	0	0	0
K10108	Environmental Information Processing, Membrane Transport, ABC transporters, K10108 - maltose/maltodextrin transport system substrate-binding protein	malE; maltose/maltodextrin transport system substrate-binding protein	0	1	3	9	3	8	0	0	0	5	13	14	14	1	3	0	0	1	2	1	7	2	9	3	6	4	4	2	9	1	1	0	0	14	3	10	7	0	0	3	1	1	1	5	1	2	5
K10112	Environmental Information Processing, Membrane Transport, ABC transporters, K10112 - maltose/maltodextrin transport system ATP-binding protein	msmX, msmK, malK, sugC, ggtA, msiK; multiple sugar transport system ATP-binding protein	0	0	0	0	0	0	0	0	0	0	0	0	0	0	0	0	0	0	0	0	0	0	1	2	0	0	1	0	1	1	0	0	1	0	0	0	0	0	1	0	0	0	1	0	0	0	3
K10117	Environmental Information Processing, Membrane Transport, ABC transporters, K10117 - multiple sugar transport system substrate-binding protein	msmE; raffinose/stachyose/melibiose transport system substrate-binding protein	1	3	1	2	3	3	4	2	3	2	4	6	6	2	2	3	7	4	3	5	5	0	0	0	3	2	3	5	5	1	2	0	0	1	1	0	0	0	0	1	2	2	7	7	7	3	3
K10119	Environmental Information Processing, Membrane Transport, ABC transporters, K10119 - multiple sugar transport system permease protein	msmG; raffinose/stachyose/melibiose transport system permease protein	0	0	0	0	0	0	0	0	0	0	0	0	0	0	0	0	0	0	0	0	0	0	0	1	0	0	0	0	0	0	0	0	0	0	1	0	0	0	0	0	0	0	0	0	0	0	0
K10188	Environmental Information Processing, Membrane Transport, ABC transporters, K10188 - lactose/L-arabinose transport system substrate-binding protein	lacE, araN; lactose/L-arabinose transport system substrate-binding protein	63	75	108	69	86	99	49	58	75	110	116	121	63	57	66	19	33	44	89	133	104	88	76	81	94	47	110	33	32	40	101	64	71	55	61	78	28	7	24	81	77	92	64	78	81	62	61
K10192	Environmental Information Processing, Membrane Transport, ABC transporters, K10192 - oligogalacturonide transport system substrate-binding protein	togB; oligogalacturonide transport system substrate-binding protein	6	6	8	4	9	7	4	0	2	3	5	6	1	2	0	1	0	0	1	1	1	4	13	11	10	9	8	7	6	6	0	2	0	3	4	2	2	1	1	1	9	2	13	4	3	5	4
K10200	Environmental Information Processing, Membrane Transport, ABC transporters, K10200 - N-acetylglucosamine transport system substrate-binding protein	ABC.NGC.S; N-acetylglucosamine transport system substrate-binding protein	19	10	6	11	11	6	5	2	8	12	16	15	6	12	10	6	12	9	20	21	24	9	9	9	1	2	2	5	7	7	18	17	15	8	8	7	17	4	5	11	12	11	24	11	20	16	11
K10243	Environmental Information Processing, Membrane Transport, ABC transporters, K10243 - cellobiose transport system ATP-binding protein	NA	0	0	0	0	0	1	0	0	0	0	0	0	0	0	0	0	0	0	0	0	0	0	0	0	0	0	0	0	0	0	0	0	0	0	0	0	0	0	0	0	0	0	0	0	0	0	0
K10439	Environmental Information Processing, Membrane Transport, ABC transporters, K10439 - ribose transport system substrate-binding protein	rbsB; ribose transport system substrate-binding protein	47	26	41	26	35	21	17	11	35	25	31	33	23	29	30	26	26	24	22	27	27	25	19	23	27	21	15	34	26	20	25	14	15	13	17	19	21	10	26	23	11	25	18	24	34	14	12
K10440	Environmental Information Processing, Membrane Transport, ABC transporters, K10440 - ribose transport system permease protein	rbsC; ribose transport system permease protein	0	1	0	0	1	0	0	0	0	0	0	0	0	0	1	0	0	0	0	0	0	0	0	0	0	0	0	0	0	0	0	0	0	0	0	0	0	0	0	0	0	0	0	0	0	0	0
K10540	Environmental Information Processing, Membrane Transport, ABC transporters, K10540 - methyl-galactoside transport system substrate-binding protein	mglB; methyl-galactoside transport system substrate-binding protein	30	19	30	23	24	14	17	10	10	18	21	26	26	14	17	19	25	23	20	23	23	5	9	9	9	15	7	19	20	13	8	6	5	11	17	11	8	5	6	19	15	12	23	23	11	10	4
K10546	Environmental Information Processing, Membrane Transport, ABC transporters, K10546 - putative multiple sugar transport system substrate-binding protein	ABC.GGU.S, chvE; putative multiple sugar transport system substrate-binding protein	8	8	10	8	13	6	10	5	12	4	5	8	9	13	8	5	7	7	7	6	5	4	8	7	4	5	4	13	9	7	4	3	2	3	9	6	2	0	3	6	4	2	9	14	9	3	3
K10555	Environmental Information Processing, Membrane Transport, ABC transporters, K10555 - AI-2 transport system substrate-binding protein	lsrB; AI-2 transport system substrate-binding protein	0	0	0	0	0	0	0	0	0	0	0	0	0	0	0	0	1	0	0	0	0	0	0	0	0	0	0	0	0	0	0	0	0	0	0	0	0	0	0	0	0	0	0	0	0	0	0
K10559	Environmental Information Processing, Membrane Transport, ABC transporters, K10559 - rhamnose transport system substrate-binding protein	rhaS; rhamnose transport system substrate-binding protein	6	4	9	8	8	4	5	4	2	2	4	3	9	7	9	0	2	1	1	1	1	5	5	7	1	3	3	10	7	4	6	3	4	3	4	5	1	0	2	3	3	4	5	4	6	3	5
K11069	Environmental Information Processing, Membrane Transport, ABC transporters, K11069 - spermidine/putrescine transport system substrate-binding protein	potD; spermidine/putrescine transport system substrate-binding protein	1	0	1	0	0	1	0	0	0	0	0	0	0	0	0	0	0	0	1	1	1	0	0	0	1	0	0	0	0	0	0	0	0	0	0	0	0	0	0	1	0	0	0	0	0	0	1
K11070	Environmental Information Processing, Membrane Transport, ABC transporters, K11070 - spermidine/putrescine transport system permease protein	potC; spermidine/putrescine transport system permease protein	0	0	0	0	0	0	0	0	0	0	0	0	0	0	0	0	0	0	0	0	0	0	0	0	0	0	0	0	0	0	0	0	0	0	0	0	0	0	0	0	0	0	0	1	0	0	0
K11072	Environmental Information Processing, Membrane Transport, ABC transporters, K11072 - spermidine/putrescine transport system ATP-binding protein [EC:3.6.3.31]	potA; spermidine/putrescine transport system ATP-binding protein [EC:3.6.3.31]	0	0	0	0	0	0	0	0	0	0	0	0	0	0	0	0	0	0	0	0	0	0	0	0	0	0	0	1	0	0	0	0	0	0	0	0	0	0	0	0	0	0	0	0	0	0	0
K11085	Environmental Information Processing, Membrane Transport, ABC transporters, K11085 - ATP-binding cassette	msbA; ATP-binding cassette, subfamily B, bacterial MsbA [EC:3.6.3.-]	0	0	0	0	1	0	0	0	0	0	0	0	0	0	0	0	0	0	0	0	0	0	0	0	0	0	0	0	0	0	0	0	0	0	0	0	0	0	0	0	0	0	0	0	0	0	0
K13889	Environmental Information Processing, Membrane Transport, ABC transporters, K13889 - glutathione transport system substrate-binding protein	gsiB; glutathione transport system substrate-binding protein	4	11	11	8	8	6	4	6	5	11	10	9	11	3	12	5	8	9	11	9	6	5	9	6	6	6	5	5	8	8	7	3	4	4	6	7	6	3	2	7	6	7	8	10	8	8	13
K03194	Environmental Information Processing, Membrane Transport, Bacterial secretion system, K03194 - type IV secretion system protein VirB1	virB1; type IV secretion system protein VirB1	0	0	0	0	0	0	0	0	0	0	0	0	0	0	0	0	0	0	0	0	0	0	0	0	0	0	0	0	0	1	0	0	0	0	0	0	0	0	0	0	0	0	0	0	0	0	0
K02806	Environmental Information Processing, Membrane Transport, Phosphotransferase system (PTS), K02806 - PTS system	PTS-Ntr-EIIA, ptsN; PTS system, nitrogen regulatory IIA component [EC:2.7.1.69]	0	0	0	0	0	0	0	0	0	0	0	0	0	0	0	0	0	0	0	0	0	0	0	0	0	0	0	0	0	1	0	0	0	0	0	0	0	0	0	0	0	0	0	0	0	0	0
K08483	Environmental Information Processing, Membrane Transport, Phosphotransferase system (PTS), K08483 - phosphotransferase system	PTS-EI.PTSI, ptsI; phosphotransferase system, enzyme I, PtsI [EC:2.7.3.9]	0	0	0	0	0	0	0	0	0	0	0	0	0	0	0	0	0	0	1	0	0	0	0	0	0	0	0	0	0	0	0	0	1	0	0	0	0	0	0	0	0	0	0	0	0	0	0
K00494	Environmental Information Processing, Signal Transduction, Two-component system, K00494 - alkanal monooxygenase alpha chain [EC:1.14.14.3]	luxA; alkanal monooxygenase alpha chain [EC:1.14.14.3]	0	0	0	0	0	0	0	0	0	0	1	0	0	0	0	0	0	0	0	0	0	0	0	0	0	0	0	0	0	0	0	0	0	0	0	0	0	0	0	0	0	0	0	0	0	0	0
K02406	Environmental Information Processing, Signal Transduction, Two-component system, K02406 - flagellin	fliC; flagellin	4	3	9	14	10	22	3	11	10	2	5	11	9	2	4	4	2	3	17	33	29	16	30	30	8	8	7	3	7	10	20	18	22	20	19	17	7	4	4	1	1	10	15	31	14	12	10
K03406	Environmental Information Processing, Signal Transduction, Two-component system, K03406 - methyl-accepting chemotaxis protein	mcp; methyl-accepting chemotaxis protein	0	1	0	0	0	0	0	0	0	0	0	0	0	0	0	0	0	0	0	0	0	0	0	0	0	0	0	0	0	0	0	0	0	0	0	0	0	0	0	0	0	0	0	0	0	0	0
K03413	Environmental Information Processing, Signal Transduction, Two-component system, K03413 - two-component system	cheY; two-component system, chemotaxis family, response regulator CheY	0	0	0	0	0	0	0	0	0	0	0	0	0	0	0	0	0	0	0	0	0	0	0	0	0	0	0	0	0	0	0	0	0	0	0	0	0	0	1	0	0	0	0	0	0	0	0
K04751	Environmental Information Processing, Signal Transduction, Two-component system, K04751 - nitrogen regulatory protein P-II 1	glnB; nitrogen regulatory protein P-II 1	0	1	0	0	0	0	0	0	0	0	0	0	0	0	0	0	0	0	0	0	0	0	0	0	0	0	0	0	0	0	0	0	0	0	0	0	0	0	0	0	0	0	0	0	0	0	0
K07636	Environmental Information Processing, Signal Transduction, Two-component system, K07636 - two-component system	phoR; two-component system, OmpR family, phosphate regulon sensor histidine kinase PhoR [EC:2.7.13.3]	0	0	0	0	0	0	0	0	0	0	0	0	0	0	0	0	0	0	0	0	0	0	0	0	0	0	0	0	0	0	0	0	0	0	0	0	0	0	0	0	0	0	0	0	0	1	0
K07642	Environmental Information Processing, Signal Transduction, Two-component system, K07642 - two-component system	baeS, smeS; two-component system, OmpR family, sensor histidine kinase BaeS [EC:2.7.13.3]	0	0	0	0	0	0	0	0	0	0	0	0	0	0	0	0	0	0	0	0	0	0	0	0	0	0	0	0	0	0	1	0	0	0	0	0	0	0	0	0	0	0	0	0	0	0	0
K07648	Environmental Information Processing, Signal Transduction, Two-component system, K07648 - two-component system	arcB; two-component system, OmpR family, aerobic respiration control sensor histidine kinase ArcB [EC:2.7.13.3]	0	0	0	0	0	0	0	0	0	0	0	0	0	0	0	0	0	0	0	0	0	0	0	0	0	0	0	0	1	0	0	0	0	0	0	0	0	0	0	0	0	0	0	0	0	1	0
K07649	Environmental Information Processing, Signal Transduction, Two-component system, K07649 - two-component system	tctE; two-component system, OmpR family, sensor histidine kinase TctE [EC:2.7.13.3]	1	0	0	0	0	0	0	0	0	0	0	0	0	0	0	0	0	0	0	0	0	0	0	0	0	0	0	0	0	0	0	0	0	0	0	0	0	0	0	0	1	0	0	0	0	0	0
K07650	Environmental Information Processing, Signal Transduction, Two-component system, K07650 - two-component system	cssS; two-component system, OmpR family, sensor histidine kinase CssS [EC:2.7.13.3]	0	0	0	0	0	0	0	0	0	0	0	0	0	0	0	0	0	0	0	0	1	0	0	0	0	0	0	0	0	0	0	0	0	0	0	0	0	0	0	0	0	0	0	0	0	0	0
K07665	Environmental Information Processing, Signal Transduction, Two-component system, K07665 - two-component system	cusR, copR, silR; two-component system, OmpR family, copper resistance phosphate regulon response regulator CusR	0	0	0	0	0	0	0	0	0	0	0	0	0	0	0	0	0	1	0	0	0	0	0	0	0	0	0	0	0	0	0	0	0	0	0	0	0	0	0	0	0	0	0	0	0	0	0
K07668	Environmental Information Processing, Signal Transduction, Two-component system, K07668 - two-component system	vicR; two-component system, OmpR family, response regulator VicR	0	0	0	0	0	0	0	0	0	0	0	0	0	0	0	0	0	0	0	0	0	0	0	0	0	0	0	0	0	1	0	0	0	0	0	0	0	0	0	0	0	0	0	0	0	0	0
K07709	Environmental Information Processing, Signal Transduction, Two-component system, K07709 - two-component system	zraS, hydH; two-component system, NtrC family, sensor histidine kinase HydH [EC:2.7.13.3]	0	0	0	0	1	0	0	0	0	0	0	0	0	0	0	0	0	0	0	0	0	0	0	0	0	0	0	0	0	0	0	0	0	0	0	0	0	0	0	0	0	0	0	0	0	0	0
K07718	Environmental Information Processing, Signal Transduction, Two-component system, K07718 - two-component system	yesM; two-component system, sensor histidine kinase YesM [EC:2.7.13.3]	0	0	0	1	0	0	0	0	0	0	0	0	0	0	0	0	0	0	0	0	0	0	0	0	0	0	0	0	0	0	0	0	0	0	0	0	0	0	0	1	0	0	0	0	0	0	0
K07720	Environmental Information Processing, Signal Transduction, Two-component system, K07720 - two-component system	yesN; two-component system, response regulator YesN	0	0	0	0	0	0	0	0	0	0	0	0	0	0	0	0	0	0	0	0	0	0	0	0	0	0	0	0	0	1	0	1	0	1	0	0	0	0	0	0	0	0	0	0	0	0	0
K09476	Environmental Information Processing, Signal Transduction, Two-component system, K09476 - outer membrane pore protein F	ompF; outer membrane pore protein F	0	0	0	0	0	0	0	0	0	0	0	0	0	0	0	0	0	0	0	0	0	0	0	0	0	1	0	0	0	0	0	0	0	0	0	0	0	0	0	0	0	0	0	0	0	0	0
K10943	Environmental Information Processing, Signal Transduction, Two-component system, K10943 - two component system	flrC, fleR; two-component system, response regulator FlrC	0	0	0	0	0	0	0	0	0	0	0	0	0	0	0	0	0	0	0	0	0	0	0	0	0	0	0	0	0	0	0	0	0	0	0	0	1	0	0	0	0	0	0	0	0	0	0
K11618	Environmental Information Processing, Signal Transduction, Two-component system, K11618 - two-component system	liaR; two-component system, NarL family, response regulator LiaR	0	0	0	0	0	0	0	0	0	0	0	0	0	0	0	0	0	0	0	0	0	0	0	0	0	0	0	0	0	0	0	0	0	0	0	0	0	0	0	0	0	0	1	0	0	0	0
K11688	Environmental Information Processing, Signal Transduction, Two-component system, K11688 - C4-dicarboxylate-binding protein DctP	dctP; C4-dicarboxylate-binding protein DctP	0	0	0	0	0	0	0	0	0	0	0	0	0	0	0	0	0	0	0	1	1	0	0	0	0	0	0	0	0	0	0	0	0	1	0	0	0	0	0	0	0	0	0	0	0	0	0
K13598	Environmental Information Processing, Signal Transduction, Two-component system, K13598 - two-component system	ntrY; two-component system, NtrC family, nitrogen regulation sensor histidine kinase NtrY [EC:2.7.13.3]	0	0	0	0	0	0	0	0	0	0	0	0	0	0	0	0	0	0	0	0	0	1	0	0	0	0	0	0	0	0	0	0	0	0	0	1	0	0	0	0	0	0	0	0	0	0	0
K13924	Environmental Information Processing, Signal Transduction, Two-component system, K13924 - two-component system	cheBR; two-component system, chemotaxis family, CheB/CheR fusion protein [EC:2.1.1.80 3.1.1.61]	0	0	0	0	0	0	0	0	0	0	0	0	0	0	0	0	0	0	0	0	0	0	0	0	0	0	0	0	0	0	0	0	0	0	0	0	1	0	0	0	0	0	0	0	0	0	0
K13527	Genetic Information Processing, Folding, Proteasome, K13527 - proteasome-associated ATPase	mpa; proteasome-associated ATPase	0	0	0	0	0	0	0	0	0	0	0	0	0	0	0	0	0	0	0	0	0	0	0	0	0	0	0	0	0	0	0	0	0	0	0	0	1	0	0	0	0	0	0	0	0	0	0
K03100	Genetic Information Processing, Folding, Protein export, K03100 - signal peptidase I [EC:3.4.21.89]	lepB; signal peptidase I [EC:3.4.21.89]	0	0	0	0	0	0	0	0	0	0	0	0	0	0	0	0	0	0	0	0	0	0	0	0	0	0	0	0	0	0	0	1	0	0	0	0	0	0	0	0	0	0	0	0	0	0	0
K03101	Genetic Information Processing, Folding, Protein export, K03101 - signal peptidase II [EC:3.4.23.36]	lspA; signal peptidase II [EC:3.4.23.36]	0	0	0	0	0	0	0	0	0	0	0	0	0	0	0	0	0	0	0	0	0	0	0	0	0	0	0	0	0	0	0	0	0	0	0	0	0	0	0	0	0	0	0	1	0	0	0
K03118	Genetic Information Processing, Folding, Protein export, K03118 - sec-independent protein translocase protein TatC	tatC; sec-independent protein translocase protein TatC	1	1	2	0	1	1	1	3	3	0	0	0	1	1	2	0	0	0	4	1	2	0	0	0	1	0	3	0	1	1	6	3	4	0	3	1	0	2	1	0	1	0	1	1	0	1	1
K03217	Genetic Information Processing, Folding, Protein export, K03217 - preprotein translocase subunit YidC	yidC, spoIIIJ, OXA1; YidC/Oxa1 family membrane protein insertase	0	0	0	0	0	0	0	0	0	1	1	0	0	0	0	0	0	0	0	0	0	0	0	0	0	0	0	0	0	0	0	0	0	0	0	0	0	0	0	0	0	0	0	0	0	0	0
K04079	Genetic Information Processing, Folding, Protein processing in endoplasmic reticulum, K04079 - molecular chaperone HtpG	htpG, HSP90A; molecular chaperone HtpG	0	0	0	0	0	0	0	0	0	0	0	0	0	0	0	0	0	0	1	0	0	0	0	0	0	0	0	0	0	1	0	0	0	0	1	0	0	0	0	0	0	0	3	5	1	0	1
K00970	Genetic Information Processing, Folding, RNA degradation, K00970 - poly(A) polymerase [EC:2.7.7.19]	pcnB; poly(A) polymerase [EC:2.7.7.19]	0	0	0	0	0	0	0	0	0	0	0	0	0	0	0	0	0	0	0	0	0	0	0	0	0	0	0	0	0	0	0	0	0	0	0	0	0	0	0	0	0	0	0	0	0	0	0
K03654	Genetic Information Processing, Folding, RNA degradation, K03654 - ATP-dependent DNA helicase RecQ [EC:3.6.4.12]	recQ; ATP-dependent DNA helicase RecQ [EC:3.6.4.12]	1	0	1	0	0	0	0	0	0	0	0	0	0	0	0	0	0	0	1	1	0	0	0	0	1	0	0	0	0	0	0	0	0	0	0	0	0	0	0	0	0	0	0	0	0	1	0
K04043	Genetic Information Processing, Folding, RNA degradation, K04043 - molecular chaperone DnaK	dnaK; molecular chaperone DnaK	0	0	0	0	0	0	0	0	0	0	0	1	0	0	0	0	1	0	12	2	7	1	0	9	2	0	4	1	19	20	0	0	0	1	1	4	3	0	1	0	0	2	7	18	7	3	3
K04077	Genetic Information Processing, Folding, RNA degradation, K04077 - chaperonin GroEL	groEL, HSPD1; chaperonin GroEL	0	0	0	0	0	0	0	0	0	0	0	0	1	0	0	0	0	0	5	0	4	0	0	0	6	0	2	0	5	3	0	0	0	0	0	0	0	0	0	0	0	0	16	15	0	0	2
K12574	Genetic Information Processing, Folding, RNA degradation, K12574 - ribonuclease J [EC:3.1.-.-]	rnj; ribonuclease J [EC:3.1.-.-]	0	1	0	0	0	0	0	0	0	0	0	0	0	0	0	0	0	0	0	0	0	0	0	0	0	0	0	0	0	0	0	0	0	0	0	0	0	0	0	0	0	0	0	0	0	0	0
K00566	Genetic Information Processing, Folding, Sulfur relay system, K00566 - tRNA-specific 2-thiouridylase [EC:2.8.1.-]	mnmA, trmU, TRMU; tRNA-specific 2-thiouridylase [EC:2.8.1.-]	0	1	0	0	0	0	0	0	0	0	0	0	0	0	0	0	0	0	0	0	0	0	0	0	0	0	0	0	0	0	0	0	0	0	0	0	0	0	0	0	0	0	0	0	0	0	0
K01142	Genetic Information Processing, Replication and Repair, Base excision repair, K01142 - exodeoxyribonuclease III [EC:3.1.11.2]	E3.1.11.2, xthA; exodeoxyribonuclease III [EC:3.1.11.2]	0	0	1	0	0	0	0	0	0	0	0	0	0	0	0	0	0	0	0	0	0	0	0	0	0	0	0	0	0	0	0	0	0	0	0	0	0	0	0	0	0	0	0	0	0	0	0
K07462	Genetic Information Processing, Replication and Repair, Base excision repair, K07462 - single-stranded-DNA-specific exonuclease [EC:3.1.-.-]	recJ; single-stranded-DNA-specific exonuclease [EC:3.1.-.-]	0	0	0	0	0	0	0	0	0	0	0	0	0	0	0	0	0	0	0	1	0	0	0	0	0	0	0	0	0	0	0	0	0	0	0	0	0	0	0	0	0	0	0	0	0	0	0
K10563	Genetic Information Processing, Replication and Repair, Base excision repair, K10563 - formamidopyrimidine-DNA glycosylase [EC:3.2.2.23 4.2.99.18]	mutM, fpg; formamidopyrimidine-DNA glycosylase [EC:3.2.2.23 4.2.99.18]	0	0	0	0	0	0	0	0	0	1	0	0	0	0	0	0	0	0	0	0	0	0	0	0	0	0	0	0	0	0	0	0	0	0	0	0	0	0	0	0	0	0	0	0	0	0	0
K10773	Genetic Information Processing, Replication and Repair, Base excision repair, K10773 - endonuclease III [EC:4.2.99.18]	NTH; endonuclease III [EC:4.2.99.18]	0	0	0	0	0	0	0	0	1	0	0	0	1	0	0	0	0	0	0	0	0	0	0	0	0	0	0	0	0	0	0	0	0	0	0	0	0	0	0	0	0	0	0	0	0	0	0
K01972	Genetic Information Processing, Replication and Repair, DNA replication, K01972 - DNA ligase (NAD+) [EC:6.5.1.2]	E6.5.1.2, ligA, ligB; DNA ligase (NAD+) [EC:6.5.1.2]	0	0	0	0	0	1	0	0	0	0	0	0	1	0	1	0	0	0	0	0	0	0	0	0	0	0	0	0	0	0	0	0	0	0	0	0	0	0	0	0	0	0	0	0	0	0	0
K02316	Genetic Information Processing, Replication and Repair, DNA replication, K02316 - DNA primase [EC:2.7.7.-]	dnaG; DNA primase [EC:2.7.7.-]	0	1	0	0	0	0	0	0	0	0	0	0	0	0	0	0	0	0	0	0	0	0	0	0	0	0	0	0	0	0	0	1	0	0	0	0	0	0	0	0	0	0	0	0	0	0	0
K03551	Genetic Information Processing, Replication and Repair, Homologous recombination, K03551 - holliday junction DNA helicase RuvB [EC:3.6.4.12]	ruvB; holliday junction DNA helicase RuvB [EC:3.6.4.12]	0	0	0	0	0	0	0	0	0	0	0	0	0	0	0	0	0	0	0	0	0	0	0	0	0	0	0	0	0	0	0	0	0	0	0	0	0	0	0	0	1	0	0	0	0	0	0
K03553	Genetic Information Processing, Replication and Repair, Homologous recombination, K03553 - recombination protein RecA	recA; recombination protein RecA	0	0	0	0	0	0	0	0	0	0	0	0	0	0	0	0	0	0	0	0	0	0	0	0	0	0	0	0	0	0	0	0	0	0	0	0	0	0	0	0	1	0	0	0	0	0	0
K03655	Genetic Information Processing, Replication and Repair, Homologous recombination, K03655 - ATP-dependent DNA helicase RecG [EC:3.6.4.12]	recG; ATP-dependent DNA helicase RecG [EC:3.6.4.12]	0	0	1	0	0	0	0	0	0	0	0	0	0	0	0	0	0	0	0	0	0	0	0	0	0	0	0	0	0	1	0	0	0	0	0	0	0	0	0	0	0	0	0	0	0	0	0
K06187	Genetic Information Processing, Replication and Repair, Homologous recombination, K06187 - recombination protein RecR	recR; recombination protein RecR	0	0	0	0	0	0	0	0	0	0	0	0	1	0	1	0	0	0	0	0	0	0	0	0	0	0	1	0	0	0	0	0	0	0	1	0	0	0	0	1	0	0	0	1	0	0	0
K03555	Genetic Information Processing, Replication and Repair, Mismatch repair, K03555 - DNA mismatch repair protein MutS	mutS; DNA mismatch repair protein MutS	0	0	1	0	0	0	0	0	0	0	0	0	0	0	0	0	0	0	0	0	0	0	0	0	0	0	0	0	0	0	0	0	0	0	0	0	0	0	0	0	0	0	0	0	0	0	0
K03572	Genetic Information Processing, Replication and Repair, Mismatch repair, K03572 - DNA mismatch repair protein MutL	mutL; DNA mismatch repair protein MutL	0	0	0	0	0	0	0	0	0	0	0	0	0	0	0	0	0	0	0	0	0	0	0	0	0	0	0	0	0	0	0	0	0	0	0	0	0	0	0	0	0	0	0	0	0	1	0
K03601	Genetic Information Processing, Replication and Repair, Mismatch repair, K03601 - exodeoxyribonuclease VII large subunit [EC:3.1.11.6]	xseA; exodeoxyribonuclease VII large subunit [EC:3.1.11.6]	2	1	0	0	0	0	0	0	0	0	0	1	0	0	0	0	0	0	0	0	0	0	0	0	0	0	0	0	0	0	0	0	0	0	1	0	0	0	0	0	0	0	0	0	0	0	0
K06223	Genetic Information Processing, Replication and Repair, Mismatch repair, K06223 - DNA adenine methylase [EC:2.1.1.72]	dam; DNA adenine methylase [EC:2.1.1.72]	0	0	0	0	0	0	0	0	0	0	0	0	0	0	0	0	0	0	0	0	0	0	0	0	0	0	0	0	0	0	0	0	0	0	1	0	0	0	0	0	0	0	0	0	0	0	0
K07456	Genetic Information Processing, Replication and Repair, Mismatch repair, K07456 - DNA mismatch repair protein MutS2	mutS2; DNA mismatch repair protein MutS2	0	0	0	0	0	0	0	0	0	0	0	0	0	1	0	0	0	0	0	0	0	0	0	0	0	0	0	0	0	0	0	0	0	0	0	0	0	0	0	0	0	0	0	0	0	0	0
K03657	Genetic Information Processing, Replication and Repair, Nucleotide excision repair, K03657 - DNA helicase II / ATP-dependent DNA helicase PcrA [EC:3.6.4.12]	uvrD, pcrA; DNA helicase II / ATP-dependent DNA helicase PcrA [EC:3.6.4.12]	0	0	0	0	0	0	0	0	0	0	0	0	0	0	0	0	0	0	0	0	0	0	0	0	0	0	0	0	0	1	0	0	0	0	0	1	0	0	0	0	0	0	0	0	1	0	0
K03701	Genetic Information Processing, Replication and Repair, Nucleotide excision repair, K03701 - excinuclease ABC subunit A	uvrA; excinuclease ABC subunit A	0	0	0	0	0	0	0	0	0	0	0	0	0	0	0	0	0	0	0	0	0	0	1	0	0	0	0	0	0	0	0	0	0	0	0	0	0	0	0	0	0	0	0	0	0	0	0
K03703	Genetic Information Processing, Replication and Repair, Nucleotide excision repair, K03703 - excinuclease ABC subunit C	uvrC; excinuclease ABC subunit C	0	1	0	0	0	0	0	0	0	0	0	0	0	0	0	0	0	0	0	0	0	0	0	0	0	0	0	0	0	0	0	0	0	0	0	0	0	0	0	0	0	0	0	1	1	0	0
K03723	Genetic Information Processing, Replication and Repair, Nucleotide excision repair, K03723 - transcription-repair coupling factor (superfamily II helicase) [EC:3.6.4.-]	mfd; transcription-repair coupling factor (superfamily II helicase) [EC:3.6.4.-]	0	0	0	0	0	0	0	0	0	0	0	0	0	0	0	0	0	0	0	0	0	0	0	0	0	0	0	0	0	0	0	0	0	0	0	0	0	0	0	0	0	0	1	0	0	0	0
K01866	Genetic Information Processing, Translation, Aminoacyl-tRNA biosynthesis, K01866 - tyrosyl-tRNA synthetase [EC:6.1.1.1]	YARS, tyrS; tyrosyl-tRNA synthetase [EC:6.1.1.1]	0	0	0	0	0	0	0	0	0	0	0	0	0	0	0	0	0	0	0	0	0	0	0	0	0	0	0	0	0	0	0	1	0	0	0	0	0	0	0	0	0	0	0	0	0	0	0
K01868	Genetic Information Processing, Translation, Aminoacyl-tRNA biosynthesis, K01868 - threonyl-tRNA synthetase [EC:6.1.1.3]	TARS, thrS; threonyl-tRNA synthetase [EC:6.1.1.3]	0	1	2	0	0	0	0	0	0	2	0	3	0	0	0	0	2	0	2	1	0	0	0	0	0	0	0	1	0	0	0	0	2	0	0	0	0	0	0	0	0	2	1	0	1	1	0
K01869	Genetic Information Processing, Translation, Aminoacyl-tRNA biosynthesis, K01869 - leucyl-tRNA synthetase [EC:6.1.1.4]	LARS, leuS; leucyl-tRNA synthetase [EC:6.1.1.4]	0	0	0	0	0	0	0	0	0	0	0	0	0	0	0	0	0	0	1	0	0	0	1	1	0	0	0	0	0	1	0	0	0	0	0	0	0	0	0	0	0	0	1	0	0	0	0
K01870	Genetic Information Processing, Translation, Aminoacyl-tRNA biosynthesis, K01870 - isoleucyl-tRNA synthetase [EC:6.1.1.5]	IARS, ileS; isoleucyl-tRNA synthetase [EC:6.1.1.5]	0	0	0	0	0	0	0	1	1	0	0	0	0	0	0	0	0	0	0	0	0	0	0	0	0	0	0	0	0	0	0	0	0	0	0	0	0	0	0	0	0	0	1	0	0	0	0
K01872	Genetic Information Processing, Translation, Aminoacyl-tRNA biosynthesis, K01872 - alanyl-tRNA synthetase [EC:6.1.1.7]	AARS, alaS; alanyl-tRNA synthetase [EC:6.1.1.7]	0	0	0	0	0	0	0	0	0	0	0	0	0	0	0	0	0	0	0	0	0	0	0	0	0	0	0	0	0	0	0	0	0	0	1	0	0	0	0	0	0	0	0	0	0	0	0
K01875	Genetic Information Processing, Translation, Aminoacyl-tRNA biosynthesis, K01875 - seryl-tRNA synthetase [EC:6.1.1.11]	SARS, serS; seryl-tRNA synthetase [EC:6.1.1.11]	0	0	0	0	0	0	0	0	0	0	0	0	0	0	0	0	0	0	3	1	2	1	1	2	0	0	0	0	1	1	0	0	0	0	1	2	0	0	0	0	0	0	2	2	2	0	0
K01876	Genetic Information Processing, Translation, Aminoacyl-tRNA biosynthesis, K01876 - aspartyl-tRNA synthetase [EC:6.1.1.12]	DARS, aspS; aspartyl-tRNA synthetase [EC:6.1.1.12]	0	0	0	1	0	0	0	0	0	0	0	0	1	0	1	0	0	0	2	16	7	2	1	1	0	0	0	0	0	1	0	0	0	0	1	2	0	0	0	0	0	0	0	3	1	0	0
K01879	Genetic Information Processing, Translation, Aminoacyl-tRNA biosynthesis, K01879 - glycyl-tRNA synthetase beta chain [EC:6.1.1.14]	glyS; glycyl-tRNA synthetase beta chain [EC:6.1.1.14]	0	0	0	0	0	1	0	0	1	1	1	0	0	0	0	0	0	0	0	1	1	0	0	0	0	0	0	0	0	0	0	0	0	0	0	0	0	0	0	0	0	0	0	0	0	1	0
K01880	Genetic Information Processing, Translation, Aminoacyl-tRNA biosynthesis, K01880 - glycyl-tRNA synthetase [EC:6.1.1.14]	GARS, glyS1; glycyl-tRNA synthetase [EC:6.1.1.14]	0	0	0	0	0	3	0	0	0	0	0	0	0	0	0	0	0	0	4	1	1	3	3	2	0	0	0	0	3	3	0	0	0	1	4	5	2	1	0	0	0	0	0	2	2	0	1
K01881	Genetic Information Processing, Translation, Aminoacyl-tRNA biosynthesis, K01881 - prolyl-tRNA synthetase [EC:6.1.1.15]	PARS, proS; prolyl-tRNA synthetase [EC:6.1.1.15]	0	1	5	2	1	5	5	3	7	4	2	2	1	4	3	3	5	2	4	2	3	1	0	0	4	2	2	2	1	3	1	0	0	0	1	2	2	0	0	0	1	4	0	1	2	2	3
K01883	Genetic Information Processing, Translation, Aminoacyl-tRNA biosynthesis, K01883 - cysteinyl-tRNA synthetase [EC:6.1.1.16]	CARS, cysS; cysteinyl-tRNA synthetase [EC:6.1.1.16]	0	0	0	0	0	0	0	0	1	0	0	0	0	0	0	0	0	0	0	0	0	0	0	0	0	0	0	0	0	0	0	0	0	0	0	0	0	0	1	0	0	0	0	0	0	0	0
K01887	Genetic Information Processing, Translation, Aminoacyl-tRNA biosynthesis, K01887 - arginyl-tRNA synthetase [EC:6.1.1.19]	RARS, argS; arginyl-tRNA synthetase [EC:6.1.1.19]	0	0	0	0	0	1	0	0	0	0	0	0	0	0	0	0	0	0	0	0	0	0	0	0	0	0	0	0	1	1	0	1	0	0	0	0	0	0	0	0	0	0	0	0	0	0	0
K01889	Genetic Information Processing, Translation, Aminoacyl-tRNA biosynthesis, K01889 - phenylalanyl-tRNA synthetase alpha chain [EC:6.1.1.20]	FARSA, pheS; phenylalanyl-tRNA synthetase alpha chain [EC:6.1.1.20]	0	0	0	0	0	0	0	0	0	0	0	0	0	0	0	0	0	0	0	0	0	0	0	0	0	0	0	0	0	1	0	0	0	0	0	0	0	0	0	0	0	0	0	0	0	0	0
K01892	Genetic Information Processing, Translation, Aminoacyl-tRNA biosynthesis, K01892 - histidyl-tRNA synthetase [EC:6.1.1.21]	HARS, hisS; histidyl-tRNA synthetase [EC:6.1.1.21]	0	0	0	0	0	0	0	0	0	0	0	0	0	0	0	0	0	0	0	0	0	0	0	0	0	0	0	0	0	0	1	0	1	0	0	0	0	0	0	0	0	0	0	0	0	0	0
K02433	Genetic Information Processing, Translation, Aminoacyl-tRNA biosynthesis, K02433 - aspartyl-tRNA(Asn)/glutamyl-tRNA (Gln) amidotransferase subunit A [EC:6.3.5.6 6.3.5.7]	gatA, QRSL1; aspartyl-tRNA(Asn)/glutamyl-tRNA(Gln) amidotransferase subunit A [EC:6.3.5.6 6.3.5.7]	0	0	0	1	1	0	0	0	1	2	5	2	1	0	1	0	0	0	0	1	0	0	1	1	0	0	0	1	0	0	0	0	0	0	0	1	0	0	0	0	0	0	0	0	0	0	0
K02434	Genetic Information Processing, Translation, Aminoacyl-tRNA biosynthesis, K02434 - aspartyl-tRNA(Asn)/glutamyl-tRNA (Gln) amidotransferase subunit B [EC:6.3.5.6 6.3.5.7]	gatB, PET112; aspartyl-tRNA(Asn)/glutamyl-tRNA(Gln) amidotransferase subunit B [EC:6.3.5.6 6.3.5.7]	0	0	0	0	0	0	0	0	0	0	0	0	0	0	0	0	0	0	1	1	0	0	0	0	0	0	0	0	0	1	0	0	0	0	0	0	0	0	0	0	0	0	0	0	0	0	0
K04567	Genetic Information Processing, Translation, Aminoacyl-tRNA biosynthesis, K04567 - lysyl-tRNA synthetase	KARS, lysS; lysyl-tRNA synthetase, class II [EC:6.1.1.6]	0	0	0	0	0	0	0	0	0	0	0	0	0	0	0	0	0	0	0	0	0	0	0	0	0	0	0	0	1	0	0	1	2	0	0	0	0	0	0	0	0	0	0	0	0	0	0
K02878	Genetic Information Processing, Translation, Ribosome, K02878 - large subunit ribosomal protein L16	RP-L16, MRPL16, rplP; large subunit ribosomal protein L16	0	0	0	0	0	0	0	0	0	0	0	0	0	0	0	0	0	0	0	0	0	0	0	0	0	0	0	0	0	0	0	0	0	0	0	0	0	0	0	0	0	1	0	0	0	0	0
K02886	Genetic Information Processing, Translation, Ribosome, K02886 - large subunit ribosomal protein L2	RP-L2, MRPL2, rplB; large subunit ribosomal protein L2	0	0	0	0	0	0	0	0	0	0	0	0	0	0	0	0	0	0	0	0	0	1	0	0	0	0	0	0	1	0	0	0	0	0	2	0	0	0	0	0	0	0	0	0	0	0	0
K02888	Genetic Information Processing, Translation, Ribosome, K02888 - large subunit ribosomal protein L21	RP-L21, MRPL21, rplU; large subunit ribosomal protein L21	0	0	0	0	0	0	0	0	0	0	0	1	0	0	0	0	0	0	0	0	0	0	0	0	0	0	0	0	0	0	0	0	0	0	0	0	0	0	0	0	0	0	0	0	0	0	0
K02897	Genetic Information Processing, Translation, Ribosome, K02897 - large subunit ribosomal protein L25	RP-L25, rplY; large subunit ribosomal protein L25	0	0	0	0	0	0	0	0	0	0	0	0	0	0	0	0	0	0	0	0	0	0	0	0	0	0	0	0	1	0	0	0	0	0	0	0	0	0	0	0	0	0	0	0	0	0	0
K02902	Genetic Information Processing, Translation, Ribosome, K02902 - large subunit ribosomal protein L28	RP-L28, MRPL28, rpmB; large subunit ribosomal protein L28	0	0	0	0	0	0	0	0	0	0	0	1	0	0	0	0	0	0	0	0	0	0	0	0	0	0	0	0	0	0	0	0	0	0	0	0	0	0	0	0	0	0	0	0	0	0	0
K02906	Genetic Information Processing, Translation, Ribosome, K02906 - large subunit ribosomal protein L3	RP-L3, MRPL3, rplC; large subunit ribosomal protein L3	0	0	0	0	0	0	0	0	0	0	0	0	0	0	0	0	0	0	0	0	0	0	0	0	0	0	0	0	0	1	0	0	0	0	0	0	0	0	0	0	0	0	0	1	0	0	0
K02916	Genetic Information Processing, Translation, Ribosome, K02916 - large subunit ribosomal protein L35	RP-L35, MRPL35, rpmI; large subunit ribosomal protein L35	0	0	0	0	0	0	0	0	0	0	0	0	0	0	0	0	0	0	0	0	0	0	0	0	0	0	0	0	0	0	0	0	0	0	0	0	0	0	0	0	0	0	3	0	0	0	0
K02926	Genetic Information Processing, Translation, Ribosome, K02926 - large subunit ribosomal protein L4	RP-L4, MRPL4, rplD; large subunit ribosomal protein L4	0	0	0	0	0	0	0	0	0	0	0	0	0	0	0	0	0	0	0	0	0	0	0	0	0	0	0	0	0	0	0	0	0	0	0	0	1	0	0	0	0	0	0	0	0	0	0
K02931	Genetic Information Processing, Translation, Ribosome, K02931 - large subunit ribosomal protein L5	RP-L5, MRPL5, rplE; large subunit ribosomal protein L5	0	0	0	1	0	0	0	0	0	0	0	0	1	0	0	0	0	0	0	2	1	0	0	0	0	0	0	2	0	0	0	0	0	0	0	0	0	0	0	0	0	0	0	1	0	2	0
K02935	Genetic Information Processing, Translation, Ribosome, K02935 - large subunit ribosomal protein L7/L12	RP-L7, MRPL12, rplL; large subunit ribosomal protein L7/L12	0	0	0	0	1	0	0	0	0	0	0	0	0	0	0	0	0	0	0	0	0	0	0	0	0	0	0	0	0	0	0	0	0	0	0	0	0	0	0	0	0	0	0	0	0	0	0
K02945	Genetic Information Processing, Translation, Ribosome, K02945 - small subunit ribosomal protein S1	RP-S1, rpsA; small subunit ribosomal protein S1	0	0	0	0	0	0	0	0	0	0	0	0	0	0	0	0	0	0	0	0	0	0	0	0	0	0	0	0	1	1	0	0	0	0	0	0	0	0	0	0	0	0	0	1	0	0	0
K02954	Genetic Information Processing, Translation, Ribosome, K02954 - small subunit ribosomal protein S14	RP-S14, MRPS14, rpsN; small subunit ribosomal protein S14	2	2	0	0	0	0	1	0	0	3	3	4	0	1	4	0	0	0	2	2	2	0	1	3	0	0	1	1	1	1	1	3	2	0	0	0	0	0	1	1	0	0	0	0	0	1	2
K02968	Genetic Information Processing, Translation, Ribosome, K02968 - small subunit ribosomal protein S20	RP-S20, rpsT; small subunit ribosomal protein S20	0	0	0	0	0	0	0	0	0	0	0	0	0	1	0	0	1	0	0	1	0	0	0	0	0	0	0	0	0	0	0	0	0	0	0	0	0	0	0	0	0	0	0	1	0	0	0
K02988	Genetic Information Processing, Translation, Ribosome, K02988 - small subunit ribosomal protein S5	RP-S5, MRPS5, rpsE; small subunit ribosomal protein S5	0	0	0	0	0	0	0	1	0	0	0	0	0	0	0	0	0	0	0	0	0	0	0	0	0	0	0	0	1	0	0	0	0	0	0	0	0	0	0	0	0	0	0	0	0	0	0
K02990	Genetic Information Processing, Translation, Ribosome, K02990 - small subunit ribosomal protein S6	RP-S6, MRPS6, rpsF; small subunit ribosomal protein S6	0	0	0	0	0	0	0	0	0	0	0	0	0	0	0	0	0	0	1	0	0	0	0	0	0	0	0	0	0	0	0	0	0	0	0	0	0	0	0	0	0	0	0	0	0	0	0
K13963	Human Diseases, Infectious Diseases, Amoebiasis, K13963 - serpin B	SERPINB; serpin B	0	0	0	0	0	0	0	0	0	0	0	0	0	0	0	0	0	0	0	0	0	0	0	0	0	0	0	0	0	1	1	1	0	0	0	0	0	0	0	0	0	0	0	0	0	0	0
K13730	Human Diseases, Infectious Diseases, Bacterial invasion of epithelial cells, K13730 - internalin A	inlA; internalin A	0	0	0	0	0	0	0	0	0	0	0	0	0	0	0	0	1	1	0	0	0	0	0	0	0	0	0	0	0	0	0	0	0	0	0	0	0	0	0	0	0	0	0	0	0	0	0
K13734	Human Diseases, Infectious Diseases, Bacterial invasion of epithelial cells, K13734 - fibronectin-binding protein 1	sfb1; fibronectin-binding protein 1	0	0	0	0	0	0	0	0	0	0	0	0	0	0	0	0	0	0	0	0	0	0	0	0	0	0	0	0	0	0	0	0	0	0	0	0	0	0	0	0	0	0	0	0	1	0	0
K13735	Human Diseases, Infectious Diseases, Bacterial invasion of epithelial cells, K13735 - adhesin/invasin	yeeJ; adhesin/invasin	0	0	0	0	0	0	0	0	0	0	0	0	0	0	0	0	0	0	0	0	0	0	0	0	0	0	0	0	0	0	0	0	0	0	0	0	0	0	0	0	0	1	0	0	0	0	0
K01354	Human Diseases, Infectious Diseases, Chagas disease (American trypanosomiasis), K01354 - oligopeptidase B [EC:3.4.21.83]	ptrB; oligopeptidase B [EC:3.4.21.83]	0	0	0	0	0	0	0	0	0	0	0	0	0	0	0	0	0	0	0	0	0	0	0	0	0	0	0	0	0	0	0	0	0	0	0	0	0	0	0	0	0	0	1	0	0	0	0
K08303	Human Diseases, Infectious Diseases, Epithelial cell signaling in Helicobacter pylori infection, K08303 - putative protease [EC:3.4.-.-]	K08303; putative protease [EC:3.4.-.-]	0	0	0	0	0	0	0	0	0	0	0	0	0	0	0	0	0	0	0	0	0	0	0	0	0	0	0	0	0	0	1	1	0	0	0	0	0	0	0	0	0	0	0	0	0	0	0
K07326	Human Diseases, Infectious Diseases, Pertussis, K07326 - hemolysin activation/secretion protein	fhaC; hemolysin activation/secretion protein	0	0	0	0	0	0	0	0	0	0	0	0	0	0	0	0	0	0	0	0	0	0	0	0	0	0	0	0	0	0	1	0	0	0	0	0	0	0	0	0	0	0	0	0	0	0	0
K07345	Human Diseases, Infectious Diseases, Pertussis, K07345 - major type 1 subunit fimbrin (pilin)	fimA; major type 1 subunit fimbrin (pilin)	0	0	0	0	0	0	0	0	0	0	0	0	0	0	0	0	0	0	0	0	0	0	0	0	0	0	0	0	0	0	0	0	0	0	0	0	0	0	0	1	0	0	0	0	0	0	0
K07347	Human Diseases, Infectious Diseases, Pertussis, K07347 - outer membrane usher protein	fimD, fimC, mrkC, htrE, cssD; outer membrane usher protein	0	0	0	0	0	0	0	0	0	0	0	0	0	0	0	0	0	0	0	0	0	0	0	0	0	0	0	0	0	0	0	0	0	0	0	0	0	0	0	0	0	0	0	0	0	0	0
K05916	Human Diseases, Infectious Diseases, Salmonella infection, K05916 - nitric oxide dioxygenase [EC:1.14.12.17]	hmp, YHB1; nitric oxide dioxygenase [EC:1.14.12.17]	0	0	0	0	0	0	0	0	0	0	0	0	0	0	0	0	0	0	0	0	0	0	0	0	0	0	0	0	0	0	0	0	1	0	0	0	0	0	0	0	0	0	0	0	0	0	0
K00259	Metabolism, Amino Acid Metabolism, Alanine, K00259 - alanine dehydrogenase [EC:1.4.1.1]	ald; alanine dehydrogenase [EC:1.4.1.1]	0	0	0	0	0	0	0	0	0	0	0	0	0	0	0	0	0	1	3	0	1	0	0	0	0	0	0	1	0	1	1	1	0	0	0	0	0	0	0	0	0	0	4	4	3	1	0
K00278	Metabolism, Amino Acid Metabolism, Alanine, K00278 - L-aspartate oxidase [EC:1.4.3.16]	nadB; L-aspartate oxidase [EC:1.4.3.16]	1	0	0	0	0	1	0	1	0	0	0	0	0	0	0	0	0	0	2	1	1	0	0	1	1	0	0	0	0	0	0	0	0	0	0	0	0	0	0	1	1	1	0	0	0	0	0
K00294	Metabolism, Amino Acid Metabolism, Alanine, K00294 - 1-pyrroline-5-carboxylate dehydrogenase [EC:1.5.1.12]	E1.2.1.88; 1-pyrroline-5-carboxylate dehydrogenase [EC:1.2.1.88]	0	0	0	0	1	1	0	1	0	0	0	0	0	0	0	1	1	0	1	2	2	1	0	0	0	1	0	0	3	0	0	0	0	0	0	0	1	0	0	0	0	0	3	2	2	0	0
K00811	Metabolism, Amino Acid Metabolism, Alanine, K00811 - aspartate aminotransferase	ASP5; aspartate aminotransferase, chloroplastic [EC:2.6.1.1]	0	0	0	0	1	2	0	0	1	2	3	4	0	0	0	0	0	0	4	1	1	0	0	0	0	0	1	0	0	1	1	0	0	1	1	2	0	0	0	0	0	0	0	0	0	0	0
K00812	Metabolism, Amino Acid Metabolism, Alanine, K00812 - aspartate aminotransferase [EC:2.6.1.1]	aspB; aspartate aminotransferase [EC:2.6.1.1]	13	10	13	0	1	3	6	15	10	7	16	13	1	10	1	1	3	1	27	22	22	3	12	2	20	12	26	8	11	6	5	1	1	3	7	9	17	18	20	11	22	19	9	6	3	26	18
K01755	Metabolism, Amino Acid Metabolism, Alanine, K01755 - argininosuccinate lyase [EC:4.3.2.1]	argH, ASL; argininosuccinate lyase [EC:4.3.2.1]	0	0	0	0	0	0	0	0	0	0	0	0	0	0	0	0	0	0	0	0	0	1	0	0	0	0	0	0	0	0	0	0	0	0	0	0	0	0	1	0	0	0	0	0	0	0	0
K01779	Metabolism, Amino Acid Metabolism, Alanine, K01779 - aspartate racemase [EC:5.1.1.13]	E5.1.1.13; aspartate racemase [EC:5.1.1.13]	0	0	0	0	0	0	0	0	0	0	0	0	0	0	0	0	0	0	0	0	0	0	1	0	0	0	0	0	0	0	0	0	0	0	0	0	0	0	0	0	0	0	0	0	0	0	0
K01940	Metabolism, Amino Acid Metabolism, Alanine, K01940 - argininosuccinate synthase [EC:6.3.4.5]	argG, ASS1; argininosuccinate synthase [EC:6.3.4.5]	0	4	4	3	3	2	1	2	1	3	2	3	1	0	3	1	0	0	4	3	5	2	1	3	0	0	0	3	5	6	0	0	0	3	4	3	1	0	1	0	0	1	10	7	7	0	3
K11358	Metabolism, Amino Acid Metabolism, Alanine, K11358 - aspartate aminotransferase [EC:2.6.1.1]	yhdR; aspartate aminotransferase [EC:2.6.1.1]	0	0	0	0	0	0	0	0	0	2	2	2	2	1	1	0	0	0	0	1	1	0	0	0	1	0	0	0	0	0	0	0	1	1	0	1	0	0	0	0	2	0	0	2	1	0	1
K00145	Metabolism, Amino Acid Metabolism, Arginine and proline metabolism, K00145 - N-acetyl-gamma-glutamyl-phosphate reductase [EC:1.2.1.38]	argC; N-acetyl-gamma-glutamyl-phosphate reductase [EC:1.2.1.38]	12	19	16	9	13	11	4	12	15	16	17	16	11	3	16	7	13	18	32	25	20	11	14	14	20	8	18	13	19	8	2	10	5	13	17	14	11	4	11	5	20	15	31	26	18	12	10
K00611	Metabolism, Amino Acid Metabolism, Arginine and proline metabolism, K00611 - ornithine carbamoyltransferase [EC:2.1.3.3]	OTC, argF, argI; ornithine carbamoyltransferase [EC:2.1.3.3]	2	3	2	1	5	2	0	0	0	1	2	1	2	2	1	5	0	3	5	1	1	2	2	1	1	1	1	1	1	3	4	1	2	1	2	2	4	5	2	2	2	1	4	1	2	4	4
K00818	Metabolism, Amino Acid Metabolism, Arginine and proline metabolism, K00818 - acetylornithine aminotransferase [EC:2.6.1.11]	E2.6.1.11, argD; acetylornithine aminotransferase [EC:2.6.1.11]	5	1	3	6	1	3	2	4	4	2	7	4	2	1	3	2	2	1	2	3	3	1	0	0	3	3	1	3	6	4	3	0	0	1	1	3	0	0	0	4	2	2	0	1	0	0	0
K00819	Metabolism, Amino Acid Metabolism, Arginine and proline metabolism, K00819 - ornithine--oxo-acid transaminase [EC:2.6.1.13]	E2.6.1.13, rocD; ornithine--oxo-acid transaminase [EC:2.6.1.13]	0	0	0	0	0	1	0	0	0	0	0	0	0	0	0	1	1	0	2	1	1	0	0	0	0	0	0	0	0	0	0	0	0	0	0	0	0	0	0	0	0	0	0	0	1	0	0
K01438	Metabolism, Amino Acid Metabolism, Arginine and proline metabolism, K01438 - acetylornithine deacetylase [EC:3.5.1.16]	argE; acetylornithine deacetylase [EC:3.5.1.16]	0	0	0	0	0	0	0	0	0	0	0	0	0	0	0	0	0	0	1	2	2	0	0	0	0	0	0	0	0	0	0	0	0	0	0	0	0	0	0	0	0	0	0	0	0	0	0
K01478	Metabolism, Amino Acid Metabolism, Arginine and proline metabolism, K01478 - arginine deiminase [EC:3.5.3.6]	E3.5.3.6, arcA; arginine deiminase [EC:3.5.3.6]	3	10	7	6	11	1	0	1	2	5	9	9	8	2	9	0	0	1	0	1	0	10	9	6	4	4	0	9	12	5	3	7	6	0	4	4	4	5	7	4	11	9	0	1	2	3	5
K01585	Metabolism, Amino Acid Metabolism, Arginine and proline metabolism, K01585 - arginine decarboxylase [EC:4.1.1.19]	E4.1.1.19S, speA; arginine decarboxylase [EC:4.1.1.19]	0	0	1	0	0	0	0	0	0	0	0	0	0	0	0	0	0	0	0	0	0	0	0	0	0	0	0	0	0	0	0	0	0	0	0	0	0	0	0	0	0	0	0	0	0	0	0
K01777	Metabolism, Amino Acid Metabolism, Arginine and proline metabolism, K01777 - proline racemase [EC:5.1.1.4]	E5.1.1.4; proline racemase [EC:5.1.1.4]	1	2	2	1	0	0	0	3	2	3	2	3	1	1	2	2	1	3	0	0	2	1	1	2	2	0	0	3	2	2	0	0	0	0	0	0	1	2	1	2	3	3	2	3	3	1	2
K09251	Metabolism, Amino Acid Metabolism, Arginine and proline metabolism, K09251 - putrescine aminotransferase [EC:2.6.1.82]	E2.6.1.82; putrescine aminotransferase [EC:2.6.1.82]	0	0	0	1	1	1	0	0	0	0	0	0	0	0	0	0	0	0	0	0	0	0	0	0	0	0	0	0	0	0	0	0	1	0	0	0	0	0	0	0	1	0	0	0	0	0	0
K10536	Metabolism, Amino Acid Metabolism, Arginine and proline metabolism, K10536 - agmatine deiminase [EC:3.5.3.12]	E3.5.3.12; agmatine deiminase [EC:3.5.3.12]	1	0	0	0	0	0	0	0	0	0	1	1	0	1	1	0	1	0	0	0	0	0	0	0	0	0	0	0	0	0	0	0	0	0	0	0	0	0	0	2	0	1	0	0	0	0	0
K13747	Metabolism, Amino Acid Metabolism, Arginine and proline metabolism, K13747 - carboxynorspermidine decarboxylase [EC:4.1.1.-]	nspC; carboxynorspermidine decarboxylase [EC:4.1.1.96]	0	0	0	0	0	0	0	0	0	0	0	0	0	0	0	0	0	0	0	0	0	0	0	0	0	0	0	0	0	0	1	0	0	0	0	0	0	0	0	0	0	0	0	0	0	0	0
K00548	Metabolism, Amino Acid Metabolism, Cysteine and methionine metabolism, K00548 - 5-methyltetrahydrofolate--homocysteine methyltransferase [EC:2.1.1.13]	metH, MTR; 5-methyltetrahydrofolate--homocysteine methyltransferase [EC:2.1.1.13]	0	1	0	0	0	0	0	0	0	0	2	0	0	0	0	1	1	0	1	0	2	0	0	0	0	0	0	0	0	0	0	0	0	0	0	0	1	7	3	1	3	1	0	0	0	0	0
K00549	Metabolism, Amino Acid Metabolism, Cysteine and methionine metabolism, K00549 - 5-methyltetrahydropteroyltriglutamate--homocysteine methyltransferase [EC:2.1.1.14]	metE; 5-methyltetrahydropteroyltriglutamate--homocysteine methyltransferase [EC:2.1.1.14]	2	0	1	1	1	1	0	0	0	2	2	4	0	0	4	0	0	0	0	2	1	0	1	3	2	0	1	1	1	3	0	0	0	2	3	0	0	0	0	2	0	0	1	2	3	0	2
K00558	Metabolism, Amino Acid Metabolism, Cysteine and methionine metabolism, K00558 - DNA (cytosine-5-)-methyltransferase [EC:2.1.1.37]	DNMT1, dcm; DNA (cytosine-5)-methyltransferase 1 [EC:2.1.1.37]	0	0	0	0	0	0	0	0	0	0	0	0	0	0	0	0	0	0	0	1	0	0	0	0	0	0	0	0	0	0	0	0	0	0	0	0	0	0	0	0	0	0	0	0	0	0	0
K00789	Metabolism, Amino Acid Metabolism, Cysteine and methionine metabolism, K00789 - S-adenosylmethionine synthetase [EC:2.5.1.6]	metK; S-adenosylmethionine synthetase [EC:2.5.1.6]	5	7	4	1	2	3	1	2	5	0	4	2	2	4	4	1	5	6	7	7	10	7	5	3	3	1	5	3	8	7	6	0	0	1	4	3	3	0	1	12	5	4	1	7	0	4	1
K00832	Metabolism, Amino Acid Metabolism, Cysteine and methionine metabolism, K00832 - aromatic-amino-acid transaminase [EC:2.6.1.57]	tyrB; aromatic-amino-acid transaminase [EC:2.6.1.57]	0	0	0	0	2	0	0	0	0	1	3	0	0	0	0	0	0	0	0	0	0	0	0	0	0	0	0	0	0	0	0	0	0	0	0	0	0	0	0	0	0	0	0	0	0	0	0
K01251	Metabolism, Amino Acid Metabolism, Cysteine and methionine metabolism, K01251 - adenosylhomocysteinase [EC:3.3.1.1]	E3.3.1.1, ahcY; adenosylhomocysteinase [EC:3.3.1.1]	0	0	0	0	0	0	0	0	0	0	0	0	0	0	0	0	1	0	0	0	0	0	0	0	0	0	0	0	0	0	0	0	0	0	0	0	0	0	0	0	0	0	0	0	0	1	0
K01740	Metabolism, Amino Acid Metabolism, Cysteine and methionine metabolism, K01740 - O-acetylhomoserine (thiol)-lyase [EC:2.5.1.49]	E2.5.1.49, metY; O-acetylhomoserine (thiol)-lyase [EC:2.5.1.49]	4	33	22	40	10	13	6	5	4	7	12	8	19	10	10	3	3	8	10	11	15	26	15	12	41	7	22	16	13	16	13	5	2	22	21	13	10	3	7	24	4	4	9	24	12	5	7
K01761	Metabolism, Amino Acid Metabolism, Cysteine and methionine metabolism, K01761 - methionine-gamma-lyase [EC:4.4.1.11]	E4.4.1.11; methionine-gamma-lyase [EC:4.4.1.11]	0	1	1	0	0	3	1	2	0	2	3	2	0	0	1	1	1	0	3	3	1	2	3	2	2	1	2	0	0	4	0	0	0	0	4	5	0	1	4	0	0	1	1	2	2	1	2
K00060	Metabolism, Amino Acid Metabolism, Glycine, K00060 - threonine 3-dehydrogenase [EC:1.1.1.103]	tdh; threonine 3-dehydrogenase [EC:1.1.1.103]	0	0	0	0	0	0	0	0	0	0	0	0	0	0	0	0	0	0	0	0	0	0	0	0	0	0	0	0	0	0	0	0	2	0	0	0	0	0	0	0	0	0	0	0	0	0	0
K00133	Metabolism, Amino Acid Metabolism, Glycine, K00133 - aspartate-semialdehyde dehydrogenase [EC:1.2.1.11]	asd; aspartate-semialdehyde dehydrogenase [EC:1.2.1.11]	7	6	8	0	6	13	3	10	6	7	12	9	4	11	9	1	2	3	19	9	17	24	18	15	8	1	14	7	23	22	17	14	12	2	7	7	11	4	8	0	12	11	23	20	18	12	6
K00273	Metabolism, Amino Acid Metabolism, Glycine, K00273 - D-amino-acid oxidase [EC:1.4.3.3]	DAO, aao; D-amino-acid oxidase [EC:1.4.3.3]	0	0	0	0	0	0	0	0	0	0	0	0	0	0	0	0	0	0	0	0	0	0	0	0	0	0	0	0	0	0	0	0	0	0	0	0	0	0	0	0	0	0	1	1	0	0	0
K00281	Metabolism, Amino Acid Metabolism, Glycine, K00281 - glycine dehydrogenase [EC:1.4.4.2]	GLDC, gcvP; glycine dehydrogenase [EC:1.4.4.2]	0	0	0	0	1	1	1	2	1	1	2	0	1	0	0	3	14	4	1	1	3	0	0	0	0	0	0	2	0	0	0	0	0	0	0	0	0	0	1	0	0	3	0	0	0	1	0
K00282	Metabolism, Amino Acid Metabolism, Glycine, K00282 - glycine dehydrogenase subunit 1 [EC:1.4.4.2]	gcvPA; glycine dehydrogenase subunit 1 [EC:1.4.4.2]	0	0	0	0	0	0	0	0	0	0	0	0	0	0	0	1	1	0	0	1	0	0	0	0	0	0	0	2	1	0	0	0	0	0	0	0	0	0	0	0	0	0	0	0	2	0	0
K00283	Metabolism, Amino Acid Metabolism, Glycine, K00283 - glycine dehydrogenase subunit 2 [EC:1.4.4.2]	gcvPB; glycine dehydrogenase subunit 2 [EC:1.4.4.2]	0	1	0	0	0	0	0	0	0	1	0	0	0	0	0	1	2	0	2	0	1	0	0	0	0	0	0	0	2	2	0	0	0	0	1	0	0	0	0	0	0	0	0	0	1	0	0
K00302	Metabolism, Amino Acid Metabolism, Glycine, K00302 - sarcosine oxidase	soxA; sarcosine oxidase, subunit alpha [EC:1.5.3.1]	0	0	0	0	0	0	0	0	0	0	0	0	0	0	0	0	0	0	1	0	0	0	0	0	0	0	0	0	1	1	0	0	0	0	0	0	0	0	0	0	0	0	0	0	0	0	0
K00613	Metabolism, Amino Acid Metabolism, Glycine, K00613 - glycine amidinotransferase [EC:2.1.4.1]	GATM; glycine amidinotransferase [EC:2.1.4.1]	3	8	6	0	4	1	2	1	2	1	6	1	1	0	1	0	0	1	5	4	3	2	1	4	2	0	2	0	2	4	2	1	0	1	1	4	2	0	0	1	2	1	6	4	8	7	3
K00639	Metabolism, Amino Acid Metabolism, Glycine, K00639 - glycine C-acetyltransferase [EC:2.3.1.29]	kbl, GCAT; glycine C-acetyltransferase [EC:2.3.1.29]	5	4	6	0	1	2	4	2	6	2	3	4	1	9	0	4	9	8	3	8	10	1	0	2	7	6	3	0	1	0	1	1	0	2	1	2	4	3	6	11	5	6	3	5	1	3	2
K00836	Metabolism, Amino Acid Metabolism, Glycine, K00836 - diaminobutyrate-2-oxoglutarate transaminase [EC:2.6.1.76]	E2.6.1.76, ectB; diaminobutyrate-2-oxoglutarate transaminase [EC:2.6.1.76]	0	0	0	0	0	0	0	0	0	0	0	0	0	0	0	0	0	0	0	0	0	0	0	0	0	0	0	0	0	0	0	0	0	0	0	0	0	0	0	0	1	0	0	0	0	0	0
K00928	Metabolism, Amino Acid Metabolism, Glycine, K00928 - aspartate kinase [EC:2.7.2.4]	lysC; aspartate kinase [EC:2.7.2.4]	0	0	0	0	0	0	0	0	0	0	0	0	0	0	0	0	0	0	0	1	0	0	0	0	0	0	0	1	0	0	0	0	0	0	0	0	0	0	0	0	0	0	1	0	0	0	0
K01696	Metabolism, Amino Acid Metabolism, Glycine, K01696 - tryptophan synthase beta chain [EC:4.2.1.20]	trpB; tryptophan synthase beta chain [EC:4.2.1.20]	0	0	0	0	0	0	0	0	0	0	0	0	0	0	0	0	0	0	0	0	0	0	0	0	0	0	1	0	0	0	0	0	0	0	0	0	0	0	0	0	0	0	0	0	0	0	0
K01733	Metabolism, Amino Acid Metabolism, Glycine, K01733 - threonine synthase [EC:4.2.3.1]	thrC; threonine synthase [EC:4.2.3.1]	0	1	0	2	0	2	2	2	1	4	0	1	2	3	1	1	1	0	3	5	6	5	8	8	5	2	4	0	4	5	4	0	0	3	1	7	2	1	4	0	2	1	5	7	2	8	6
K01752	Metabolism, Amino Acid Metabolism, Glycine, K01752 - L-serine dehydratase [EC:4.3.1.17]	E4.3.1.17, sdaA; L-serine dehydratase [EC:4.3.1.17]	0	0	0	0	0	0	0	0	0	0	0	0	0	0	0	0	1	0	0	0	0	0	0	0	0	0	0	0	0	0	0	0	0	0	0	0	0	0	0	0	0	0	0	0	0	0	0
K06001	Metabolism, Amino Acid Metabolism, Glycine, K06001 - tryptophan synthase beta chain [EC:4.2.1.20]	trpB; tryptophan synthase beta chain [EC:4.2.1.20]	0	0	0	0	0	0	0	0	1	0	1	1	0	0	0	0	0	0	0	0	0	0	0	0	0	0	0	1	0	0	0	0	0	0	0	0	0	0	0	0	0	0	0	1	0	0	0
K00599	Metabolism, Amino Acid Metabolism, Histidine metabolism, K00599 - [EC:2.1.1.-]	NA	0	0	1	0	1	0	1	0	1	1	1	0	0	0	0	0	0	1	0	0	0	0	0	0	0	0	0	0	0	0	0	0	0	0	0	0	1	0	0	1	1	0	0	0	0	0	0
K00817	Metabolism, Amino Acid Metabolism, Histidine metabolism, K00817 - histidinol-phosphate aminotransferase [EC:2.6.1.9]	hisC; histidinol-phosphate aminotransferase [EC:2.6.1.9]	0	0	0	0	0	0	0	0	0	1	2	1	0	0	0	0	0	0	0	1	0	0	0	0	2	0	0	0	1	0	0	0	0	0	0	0	0	0	0	0	0	0	0	0	0	0	0
K01089	Metabolism, Amino Acid Metabolism, Histidine metabolism, K01089 - imidazoleglycerol-phosphate dehydratase / histidinol-phosphatase [EC:4.2.1.19 3.1.3.15]	hisB; imidazoleglycerol-phosphate dehydratase / histidinol-phosphatase [EC:4.2.1.19 3.1.3.15]	1	0	0	0	0	0	0	0	0	0	0	0	0	0	0	0	0	0	0	0	0	0	0	0	0	0	0	0	1	0	0	0	0	0	0	0	0	0	0	0	0	0	0	0	0	0	0
K01693	Metabolism, Amino Acid Metabolism, Histidine metabolism, K01693 - imidazoleglycerol-phosphate dehydratase [EC:4.2.1.19]	hisB; imidazoleglycerol-phosphate dehydratase [EC:4.2.1.19]	0	0	0	0	0	1	0	0	0	0	0	0	0	0	0	0	0	0	0	0	0	0	0	0	0	0	0	0	0	0	0	0	0	0	0	0	0	0	0	0	0	0	0	0	0	0	0
K01712	Metabolism, Amino Acid Metabolism, Histidine metabolism, K01712 - urocanate hydratase [EC:4.2.1.49]	hutU, UROC1; urocanate hydratase [EC:4.2.1.49]	1	1	0	0	3	7	0	0	2	3	6	5	0	1	2	5	7	1	3	1	4	3	9	6	0	0	0	2	3	3	3	2	3	1	2	2	2	8	3	3	3	0	1	4	8	4	4
K01745	Metabolism, Amino Acid Metabolism, Histidine metabolism, K01745 - histidine ammonia-lyase [EC:4.3.1.3]	hutH, HAL; histidine ammonia-lyase [EC:4.3.1.3]	1	3	1	0	4	5	1	3	1	2	3	2	3	4	5	3	12	5	4	8	9	4	4	4	3	4	3	1	2	0	2	0	1	2	2	6	7	2	8	15	11	12	1	3	4	4	1
K01814	Metabolism, Amino Acid Metabolism, Histidine metabolism, K01814 - phosphoribosylformimino-5-aminoimidazole carboxamide ribotide isomerase [EC:5.3.1.16]	hisA; phosphoribosylformimino-5-aminoimidazole carboxamide ribotide isomerase [EC:5.3.1.16]	0	0	0	0	0	0	0	0	0	0	0	0	0	0	0	0	0	1	0	0	0	0	0	0	0	0	0	0	0	0	0	0	0	0	0	0	0	0	0	0	0	0	0	0	0	0	0
K02500	Metabolism, Amino Acid Metabolism, Histidine metabolism, K02500 - cyclase [EC:4.1.3.-]	hisF; cyclase [EC:4.1.3.-]	0	0	0	0	0	0	0	0	0	0	0	0	0	0	0	0	0	0	1	0	0	0	0	0	0	0	0	0	0	0	0	0	0	0	0	0	0	0	0	0	0	0	0	0	0	0	0
K04486	Metabolism, Amino Acid Metabolism, Histidine metabolism, K04486 - histidinol-phosphatase (PHP family) [EC:3.1.3.15]	E3.1.3.15B; histidinol-phosphatase (PHP family) [EC:3.1.3.15]	0	0	0	0	0	0	0	0	0	0	0	0	0	0	0	0	0	0	0	0	0	0	0	0	0	0	0	0	0	0	0	0	0	0	0	0	1	0	0	0	0	0	0	0	0	0	0
K13990	Metabolism, Amino Acid Metabolism, Histidine metabolism, K13990 - glutamate formiminotransferase / formiminotetrahydrofolate cyclodeaminase [EC:2.1.2.5 4.3.1.4]	FTCD; glutamate formiminotransferase / formiminotetrahydrofolate cyclodeaminase [EC:2.1.2.5 4.3.1.4]	0	0	0	0	0	0	0	0	0	0	0	0	0	0	0	0	0	0	0	0	0	0	0	1	0	0	0	0	0	1	0	0	0	0	0	0	0	0	0	0	0	0	0	0	0	0	0
K00215	Metabolism, Amino Acid Metabolism, Lysine biosynthesis, K00215 - dihydrodipicolinate reductase [EC:1.3.1.26]	dapB; 4-hydroxy-tetrahydrodipicolinate reductase [EC:1.17.1.8]	2	0	1	0	0	0	1	0	0	0	0	0	0	0	0	0	0	0	0	0	2	0	0	0	0	0	0	0	0	0	0	0	0	0	0	0	0	0	0	0	0	0	0	0	0	0	0
K00674	Metabolism, Amino Acid Metabolism, Lysine biosynthesis, K00674 - 2	dapD; 2,3,4,5-tetrahydropyridine-2-carboxylate N-succinyltransferase [EC:2.3.1.117]	0	0	0	2	0	0	0	0	0	0	0	0	0	0	0	0	0	0	1	1	0	0	0	0	0	0	0	0	0	0	0	0	0	0	0	1	0	0	0	0	0	0	0	0	0	0	0
K00821	Metabolism, Amino Acid Metabolism, Lysine biosynthesis, K00821 - acetylornithine/N-succinyldiaminopimelate aminotransferase [EC:2.6.1.11 2.6.1.17]	argD; acetylornithine/N-succinyldiaminopimelate aminotransferase [EC:2.6.1.11 2.6.1.17]	10	6	11	1	4	4	4	2	6	6	11	8	6	2	4	1	6	12	9	9	6	3	3	2	7	3	5	3	3	4	0	2	1	3	6	5	2	1	2	1	6	5	8	4	2	5	7
K00841	Metabolism, Amino Acid Metabolism, Lysine biosynthesis, K00841 - aminotransferase [EC:2.6.1.-]	patA; aminotransferase [EC:2.6.1.-]	0	0	0	0	0	0	0	0	0	0	0	0	0	0	0	0	0	0	0	0	0	0	0	0	0	0	0	0	1	0	0	0	0	0	0	0	0	0	0	0	0	0	0	0	0	0	0
K01439	Metabolism, Amino Acid Metabolism, Lysine biosynthesis, K01439 - succinyl-diaminopimelate desuccinylase [EC:3.5.1.18]	dapE; succinyl-diaminopimelate desuccinylase [EC:3.5.1.18]	2	7	7	7	4	8	2	1	2	3	1	5	2	5	2	2	0	2	10	11	6	5	0	1	1	0	1	2	5	3	1	0	2	1	1	2	1	1	1	3	3	6	3	1	6	3	3
K01586	Metabolism, Amino Acid Metabolism, Lysine biosynthesis, K01586 - diaminopimelate decarboxylase [EC:4.1.1.20]	lysA; diaminopimelate decarboxylase [EC:4.1.1.20]	7	2	3	2	0	2	2	1	2	1	3	2	4	1	2	3	1	2	1	3	3	2	3	2	3	1	0	0	1	1	0	0	0	1	0	1	0	0	0	3	0	1	0	0	0	1	2
K01714	Metabolism, Amino Acid Metabolism, Lysine biosynthesis, K01714 - dihydrodipicolinate synthase [EC:4.2.1.52]	dapA; 4-hydroxy-tetrahydrodipicolinate synthase [EC:4.3.3.7]	4	1	2	0	0	2	0	0	0	1	0	0	0	0	0	0	0	2	0	0	0	0	0	0	0	0	0	0	0	0	0	0	0	0	0	0	0	0	0	0	0	0	8	0	0	0	0
K01929	Metabolism, Amino Acid Metabolism, Lysine biosynthesis, K01929 - UDP-N-acetylmuramoyl-tripeptide--D-alanyl-D-alanine ligase [EC:6.3.2.10]	murF; UDP-N-acetylmuramoyl-tripeptide--D-alanyl-D-alanine ligase [EC:6.3.2.10]	1	3	1	0	1	0	1	5	5	4	6	4	2	6	4	0	2	0	9	1	10	2	2	2	4	3	7	0	1	0	0	0	1	3	4	6	5	4	4	1	2	0	3	2	0	4	4
K03340	Metabolism, Amino Acid Metabolism, Lysine biosynthesis, K03340 - diaminopimelate dehydrogenase [EC:1.4.1.16]	dapdh; diaminopimelate dehydrogenase [EC:1.4.1.16]	3	1	4	0	0	2	0	6	8	4	3	3	0	1	1	1	2	2	4	1	1	0	3	3	2	1	1	0	6	2	2	3	1	4	4	6	0	0	1	4	5	7	2	2	0	1	0
K10206	Metabolism, Amino Acid Metabolism, Lysine biosynthesis, K10206 - LL-diaminopimelate aminotransferase [EC:2.6.1.83]	E2.6.1.83; LL-diaminopimelate aminotransferase [EC:2.6.1.83]	5	6	3	1	3	4	2	1	1	4	7	6	5	3	3	0	0	3	2	5	5	4	4	1	4	2	2	2	5	7	4	0	0	3	4	3	0	0	3	0	1	0	0	2	6	0	2
K01423	Metabolism, Amino Acid Metabolism, Lysine degradation, K01423 - [EC:3.4.-.-]	NA	2	4	4	3	1	0	0	0	1	5	2	3	0	1	0	0	1	1	2	1	5	0	0	0	0	0	0	2	1	0	0	0	0	2	1	2	1	0	1	0	1	0	0	0	0	1	0
K01582	Metabolism, Amino Acid Metabolism, Lysine degradation, K01582 - lysine decarboxylase [EC:4.1.1.18]	E4.1.1.18, ldcC, cadA; lysine decarboxylase [EC:4.1.1.18]	0	0	0	0	0	0	0	0	0	0	0	0	0	0	0	0	0	0	0	0	1	0	0	0	0	0	0	0	0	0	0	0	0	0	0	0	0	0	0	0	0	0	0	0	0	0	0
K01843	Metabolism, Amino Acid Metabolism, Lysine degradation, K01843 - lysine 2	kamA; lysine 2,3-aminomutase [EC:5.4.3.2]	0	0	0	0	0	1	1	2	1	0	1	0	0	0	2	0	0	1	4	2	2	1	0	1	0	0	0	0	0	0	0	2	2	0	0	0	0	2	1	0	1	2	0	1	1	1	2
K01844	Metabolism, Amino Acid Metabolism, Lysine degradation, K01844 - beta-lysine 5	kamD; beta-lysine 5,6-aminomutase alpha subunit [EC:5.4.3.3]	0	1	0	0	0	0	0	1	1	2	0	1	0	0	2	0	0	0	0	0	0	0	1	2	1	0	0	0	0	0	0	1	1	0	0	0	1	2	1	0	2	1	1	0	1	1	1
K01451	Metabolism, Amino Acid Metabolism, Phenylalanine metabolism, K01451 - hippurate hydrolase [EC:3.5.1.32]	hipO; hippurate hydrolase [EC:3.5.1.32]	0	1	1	2	2	0	0	0	0	1	1	0	1	0	1	0	0	0	0	0	2	1	0	1	1	0	0	0	0	0	0	0	0	0	0	0	0	0	0	0	3	2	1	1	1	2	0
K01912	Metabolism, Amino Acid Metabolism, Phenylalanine metabolism, K01912 - phenylacetate-CoA ligase [EC:6.2.1.30]	paaK; phenylacetate-CoA ligase [EC:6.2.1.30]	0	0	0	0	0	0	0	0	0	0	0	0	0	0	0	0	0	0	0	0	0	0	1	0	0	0	0	0	0	1	0	0	0	0	0	0	0	0	0	0	0	0	0	0	0	0	0
K10797	Metabolism, Amino Acid Metabolism, Phenylalanine metabolism, K10797 - 2-enoate reductase [EC:1.3.1.31]	enr; 2-enoate reductase [EC:1.3.1.31]	0	0	0	0	0	0	0	0	0	0	0	0	0	0	0	0	0	0	0	0	0	0	0	0	0	0	0	0	0	0	0	0	0	0	0	0	0	0	0	0	0	0	0	0	0	1	0
K00891	Metabolism, Amino Acid Metabolism, Phenylalanine, K00891 - shikimate kinase [EC:2.7.1.71]	E2.7.1.71, aroK, aroL; shikimate kinase [EC:2.7.1.71]	1	1	0	0	0	0	0	0	0	1	1	0	0	0	0	0	0	0	0	1	1	0	0	0	0	0	0	0	0	0	0	1	0	0	0	0	1	0	0	1	0	0	0	0	0	0	0
K01626	Metabolism, Amino Acid Metabolism, Phenylalanine, K01626 - 3-deoxy-7-phosphoheptulonate synthase [EC:2.5.1.54]	E2.5.1.54, aroF, aroG, aroH; 3-deoxy-7-phosphoheptulonate synthase [EC:2.5.1.54]	1	0	0	0	0	0	0	0	0	0	0	0	0	0	0	0	0	0	0	0	0	0	0	0	0	0	0	0	0	0	0	0	0	0	0	0	0	0	0	0	0	0	0	0	0	0	0
K01657	Metabolism, Amino Acid Metabolism, Phenylalanine, K01657 - anthranilate synthase component I [EC:4.1.3.27]	trpE; anthranilate synthase component I [EC:4.1.3.27]	0	0	0	0	0	0	0	0	0	0	0	0	0	0	0	0	0	0	1	0	1	0	0	0	0	0	0	0	0	0	0	0	0	0	0	0	0	0	0	0	0	0	0	0	0	0	0
K04516	Metabolism, Amino Acid Metabolism, Phenylalanine, K04516 - chorismate mutase [EC:5.4.99.5]	AROA1, aroA; chorismate mutase [EC:5.4.99.5]	0	0	0	0	0	0	0	1	0	0	0	0	0	0	0	0	0	0	0	0	0	0	0	0	0	0	0	0	0	0	0	0	0	0	0	0	0	0	0	0	0	0	0	0	0	0	0
K04518	Metabolism, Amino Acid Metabolism, Phenylalanine, K04518 - prephenate dehydratase [EC:4.2.1.51]	pheA2; prephenate dehydratase [EC:4.2.1.51]	0	0	0	0	0	1	0	0	0	0	0	0	0	0	0	0	0	0	0	0	0	0	0	0	0	0	0	0	0	0	0	0	0	0	0	0	0	0	0	0	0	0	0	0	0	0	0
K01667	Metabolism, Amino Acid Metabolism, Tryptophan metabolism, K01667 - tryptophanase [EC:4.1.99.1]	tnaA; tryptophanase [EC:4.1.99.1]	2	7	5	1	11	9	3	1	5	7	8	10	6	2	5	2	7	3	5	5	7	11	14	9	7	6	5	5	5	8	4	4	5	3	2	5	11	9	7	3	5	3	3	11	8	5	6
K00483	Metabolism, Amino Acid Metabolism, Tyrosine metabolism, K00483 - 4-hydroxyphenylacetate-3-monooxygenase large chain [EC:1.14.14.9]	hpaB; 4-hydroxyphenylacetate 3-monooxygenase [EC:1.14.14.9]	3	4	4	0	0	1	4	5	4	1	1	1	1	3	2	3	5	8	4	9	3	0	2	0	0	1	1	1	0	0	1	1	0	0	0	0	1	1	1	3	9	2	0	0	2	2	0
K00680	Metabolism, Amino Acid Metabolism, Tyrosine metabolism, K00680 - [EC:2.3.1.-]	E2.3.1.-; [EC:2.3.1.-]	0	0	0	0	0	0	0	0	0	1	1	0	0	0	0	0	0	0	1	0	0	0	0	0	0	0	0	1	0	0	0	0	0	0	0	0	0	0	0	0	0	0	0	1	0	0	0
K01668	Metabolism, Amino Acid Metabolism, Tyrosine metabolism, K01668 - tyrosine phenol-lyase [EC:4.1.99.2]	E4.1.99.2; tyrosine phenol-lyase [EC:4.1.99.2]	0	0	0	0	0	0	0	0	0	0	0	0	1	0	0	1	0	0	0	0	0	0	0	0	0	0	0	0	0	0	0	0	0	0	0	0	0	1	1	0	0	0	0	0	0	0	0
K00052	Metabolism, Amino Acid Metabolism, Valine, K00052 - 3-isopropylmalate dehydrogenase [EC:1.1.1.85]	leuB; 3-isopropylmalate dehydrogenase [EC:1.1.1.85]	0	0	1	0	1	4	0	0	0	1	3	1	1	0	0	0	0	1	4	2	0	1	2	1	1	0	0	0	3	1	0	0	0	1	1	3	1	0	1	0	1	0	2	2	0	0	1
K00053	Metabolism, Amino Acid Metabolism, Valine, K00053 - ketol-acid reductoisomerase [EC:1.1.1.86]	ilvC; ketol-acid reductoisomerase [EC:1.1.1.86]	111	83	157	69	102	108	75	109	110	127	125	129	108	45	125	59	70	95	115	104	70	61	117	115	140	95	66	74	55	41	31	53	48	69	126	99	60	40	124	49	85	102	66	77	21	42	50
K00826	Metabolism, Amino Acid Metabolism, Valine, K00826 - branched-chain amino acid aminotransferase [EC:2.6.1.42]	E2.6.1.42, ilvE; branched-chain amino acid aminotransferase [EC:2.6.1.42]	69	32	76	36	30	48	26	29	39	31	43	44	23	19	30	15	18	24	25	42	23	12	13	14	36	23	18	26	14	15	18	7	3	17	29	29	12	5	13	19	17	17	13	17	5	9	10
K01687	Metabolism, Amino Acid Metabolism, Valine, K01687 - dihydroxy-acid dehydratase [EC:4.2.1.9]	ilvD; dihydroxy-acid dehydratase [EC:4.2.1.9]	11	11	16	7	3	6	10	10	15	12	13	12	14	8	11	10	3	6	19	13	17	9	13	11	7	5	11	9	13	6	21	5	7	8	6	6	4	2	5	2	9	7	20	23	18	8	9
K09011	Metabolism, Amino Acid Metabolism, Valine, K09011 - D-citramalate synthase [EC:2.3.1.182]	cimA; D-citramalate synthase [EC:2.3.1.182]	0	0	0	0	0	0	0	0	0	0	0	0	0	0	0	0	0	0	0	0	0	0	0	0	0	0	0	0	0	0	0	0	0	0	0	0	0	0	0	0	0	0	0	0	0	1	0
K11381	Metabolism, Amino Acid Metabolism, Valine, K11381 - 2-oxoisovalerate dehydrogenase E1 component [EC:1.2.4.4]	bkdA; 2-oxoisovalerate dehydrogenase E1 component [EC:1.2.4.4]	0	0	0	0	0	0	0	0	0	0	0	0	0	0	1	0	0	0	0	0	0	0	0	0	0	0	0	0	0	0	0	1	1	0	0	0	0	0	0	0	0	0	0	0	0	0	0
K10852	Metabolism, Biosynthesis of Other Secondary Metabolites, Penicillin and cephalosporin biosynthesis, K10852 - isopenicillin-N N-acyltransferase [EC:2.3.1.164]	E2.3.1.164; isopenicillin-N N-acyltransferase [EC:2.3.1.164]	0	0	0	0	0	0	0	0	0	0	0	0	0	0	0	0	0	1	0	0	0	0	0	0	0	0	0	0	0	0	0	0	0	0	0	0	0	0	0	0	0	0	0	0	0	0	0
K01066	Metabolism, Biosynthesis of Other Secondary Metabolites, Tropane, K01066 - esterase / lipase [EC:3.1.1.-]	E3.1.1.-; esterase / lipase [EC:3.1.1.-]	0	0	1	0	0	0	0	0	0	0	0	0	0	0	0	0	0	0	0	0	0	0	0	0	1	0	0	0	0	0	0	0	0	0	0	0	0	1	0	0	1	0	0	0	0	0	0
K13607	Metabolism, Biosynthesis of Other Secondary Metabolites, Tropane, K13607 - cinnamoyl-CoA:phenyllactate CoA-transferase [EC:2.8.3.17]	fldA; cinnamoyl-CoA:phenyllactate CoA-transferase [EC:2.8.3.17]	0	0	0	0	0	0	0	0	0	0	0	0	0	0	0	0	0	0	0	0	0	0	0	0	1	1	0	0	0	0	0	0	0	0	0	0	0	0	1	0	0	0	0	0	0	5	7
K00075	Metabolism, Carbohydrate Metabolism, Amino sugar and nucleotide sugar metabolism, K00075 - UDP-N-acetylmuramate dehydrogenase [EC:1.1.1.158]	murB; UDP-N-acetylmuramate dehydrogenase [EC:1.3.1.98]	0	0	0	0	0	0	0	0	0	0	0	0	0	0	1	0	0	0	0	0	0	0	0	0	0	0	0	0	0	0	0	0	0	0	0	0	0	1	0	0	0	0	0	1	0	0	0
K00790	Metabolism, Carbohydrate Metabolism, Amino sugar and nucleotide sugar metabolism, K00790 - UDP-N-acetylglucosamine 1-carboxyvinyltransferase [EC:2.5.1.7]	murA; UDP-N-acetylglucosamine 1-carboxyvinyltransferase [EC:2.5.1.7]	0	0	0	0	0	0	0	0	0	0	1	0	0	0	0	0	0	0	0	0	0	0	0	0	0	0	0	0	0	0	0	0	0	0	0	0	0	0	0	0	0	0	0	0	0	0	0
K00820	Metabolism, Carbohydrate Metabolism, Amino sugar and nucleotide sugar metabolism, K00820 - glucosamine--fructose-6-phosphate aminotransferase (isomerizing) [EC:2.6.1.16]	glmS, GFPT; glucosamine--fructose-6-phosphate aminotransferase (isomerizing) [EC:2.6.1.16]	0	0	0	0	0	0	0	0	0	0	1	0	0	0	0	0	0	0	0	0	1	0	0	0	0	1	0	0	0	0	0	0	0	0	0	0	0	0	0	0	0	0	0	0	0	0	0
K01207	Metabolism, Carbohydrate Metabolism, Amino sugar and nucleotide sugar metabolism, K01207 - beta-N-acetylhexosaminidase [EC:3.2.1.52]	nagZ; beta-N-acetylhexosaminidase [EC:3.2.1.52]	0	0	1	0	0	0	0	0	0	0	0	0	0	0	0	0	0	0	0	0	0	0	0	0	0	0	0	0	0	0	0	0	0	0	1	0	0	0	0	0	0	0	0	0	0	0	0
K01209	Metabolism, Carbohydrate Metabolism, Amino sugar and nucleotide sugar metabolism, K01209 - alpha-N-arabinofuranosidase [EC:3.2.1.55]	E3.2.1.55, abfA; alpha-N-arabinofuranosidase [EC:3.2.1.55]	10	21	13	10	17	15	6	8	7	24	25	25	8	3	14	6	18	6	21	18	23	12	15	17	8	5	6	6	11	6	8	3	4	8	9	17	12	2	11	17	24	22	11	31	22	2	4
K01443	Metabolism, Carbohydrate Metabolism, Amino sugar and nucleotide sugar metabolism, K01443 - N-acetylglucosamine-6-phosphate deacetylase [EC:3.5.1.25]	nagA, AMDHD2; N-acetylglucosamine-6-phosphate deacetylase [EC:3.5.1.25]	6	7	9	7	2	8	5	4	4	9	15	15	4	1	9	4	4	5	22	18	21	8	8	12	5	1	3	9	18	12	4	4	8	2	10	5	8	0	2	4	5	6	10	8	14	6	7
K01639	Metabolism, Carbohydrate Metabolism, Amino sugar and nucleotide sugar metabolism, K01639 - N-acetylneuraminate lyase [EC:4.1.3.3]	E4.1.3.3, nanA, NPL; N-acetylneuraminate lyase [EC:4.1.3.3]	0	0	0	0	0	0	0	0	0	0	1	0	0	0	0	0	1	1	2	0	3	0	2	1	1	0	1	0	0	0	0	1	3	0	0	0	1	0	1	1	4	4	4	0	0	0	0
K01709	Metabolism, Carbohydrate Metabolism, Amino sugar and nucleotide sugar metabolism, K01709 - CDP-glucose 4	rfbG; CDP-glucose 4,6-dehydratase [EC:4.2.1.45]	0	1	0	0	0	0	0	0	0	0	0	0	0	0	0	0	0	0	0	0	0	0	0	0	0	0	0	0	0	0	0	0	0	0	0	0	0	0	0	0	0	0	0	0	0	0	0
K01787	Metabolism, Carbohydrate Metabolism, Amino sugar and nucleotide sugar metabolism, K01787 - N-acylglucosamine 2-epimerase [EC:5.1.3.8]	RENBP; N-acylglucosamine 2-epimerase [EC:5.1.3.8]	7	4	1	0	6	5	0	0	1	1	4	3	1	0	2	0	2	1	1	2	1	0	0	0	2	0	2	0	1	0	1	0	0	0	0	0	1	0	0	1	2	1	2	2	1	0	0
K01788	Metabolism, Carbohydrate Metabolism, Amino sugar and nucleotide sugar metabolism, K01788 - N-acylglucosamine-6-phosphate 2-epimerase [EC:5.1.3.9]	nanE; N-acylglucosamine-6-phosphate 2-epimerase [EC:5.1.3.9]	0	0	0	0	0	0	0	0	0	0	0	0	0	0	0	0	0	0	0	0	0	0	0	0	0	0	0	0	0	0	0	0	0	0	0	0	0	0	0	0	0	0	0	1	0	0	0
K02564	Metabolism, Carbohydrate Metabolism, Amino sugar and nucleotide sugar metabolism, K02564 - glucosamine-6-phosphate deaminase [EC:3.5.99.6]	nagB, GNPDA; glucosamine-6-phosphate deaminase [EC:3.5.99.6]	0	0	0	0	0	0	0	0	0	0	0	0	0	1	0	0	0	0	0	0	0	0	0	0	0	0	0	0	0	0	0	0	0	0	0	0	0	0	0	0	0	0	1	0	0	0	0
K02765	Metabolism, Carbohydrate Metabolism, Amino sugar and nucleotide sugar metabolism, K02765 - PTS system	PTS-Dgl-EIIC, gamP; PTS system, D-glucosamine-specific IIC component	0	0	0	0	0	0	0	0	0	0	1	0	0	0	0	0	0	0	0	0	0	0	0	0	1	0	0	0	0	0	0	0	0	0	0	0	0	0	0	0	0	0	0	0	0	0	0
K02804	Metabolism, Carbohydrate Metabolism, Amino sugar and nucleotide sugar metabolism, K02804 - PTS system	PTS-Nag-EIIC, nagE; PTS system, N-acetylglucosamine-specific IIC component	0	0	0	0	0	0	0	0	0	0	0	0	0	0	1	0	0	0	0	0	1	0	0	0	0	0	0	1	7	1	0	0	0	0	0	3	0	0	0	0	0	0	0	0	0	0	0
K03431	Metabolism, Carbohydrate Metabolism, Amino sugar and nucleotide sugar metabolism, K03431 - phosphoglucosamine mutase [EC:5.4.2.10]	glmM; phosphoglucosamine mutase [EC:5.4.2.10]	0	1	1	0	0	0	0	0	0	1	2	2	0	1	1	0	0	0	1	0	0	0	2	0	0	0	0	0	0	0	0	0	0	0	1	1	0	0	0	0	1	0	1	1	1	0	1
K04042	Metabolism, Carbohydrate Metabolism, Amino sugar and nucleotide sugar metabolism, K04042 - bifunctional UDP-N-acetylglucosamine pyrophosphorylase / Glucosamine-1-phosphate N-acetyltransferase [EC:2.7.7.23 2.3.1.157]	glmU; bifunctional UDP-N-acetylglucosamine pyrophosphorylase / Glucosamine-1-phosphate N-acetyltransferase [EC:2.7.7.23 2.3.1.157]	0	0	0	0	0	0	0	0	0	0	0	0	0	0	0	0	0	0	1	0	0	0	0	0	0	0	0	0	0	0	0	0	0	0	0	0	0	0	0	0	0	0	0	0	0	0	0
K12373	Metabolism, Carbohydrate Metabolism, Amino sugar and nucleotide sugar metabolism, K12373 - hexosaminidase [EC:3.2.1.52]	HEXA_B; hexosaminidase [EC:3.2.1.52]	4	6	5	0	0	0	0	6	4	0	1	1	0	0	0	1	7	1	0	0	0	1	0	0	0	0	1	0	0	0	1	1	1	0	0	1	9	8	5	3	7	5	1	0	0	0	1
K12452	Metabolism, Carbohydrate Metabolism, Amino sugar and nucleotide sugar metabolism, K12452 - CDP-6-deoxy-D-xylo-4-hexulose-3-dehydrase	rfbH; CDP-6-deoxy-D-xylo-4-hexulose-3-dehydrase	0	0	0	0	0	0	0	0	0	0	0	0	0	0	0	0	0	0	0	0	1	0	0	1	0	0	0	0	0	0	0	0	0	0	0	0	0	0	0	0	0	0	0	0	0	0	0
K03476	Metabolism, Carbohydrate Metabolism, Ascorbate and aldarate metabolism, K03476 - L-ascorbate 6-phosphate lactonase [EC:3.1.1.-]	ulaG; L-ascorbate 6-phosphate lactonase [EC:3.1.1.-]	0	0	0	0	0	0	0	0	0	0	0	0	0	0	0	0	0	0	0	0	0	0	0	0	0	0	0	0	0	3	0	0	0	0	0	0	0	0	0	0	0	0	0	0	0	0	0
K00074	Metabolism, Carbohydrate Metabolism, Butanoate metabolism, K00074 - 3-hydroxybutyryl-CoA dehydrogenase [EC:1.1.1.157]	paaH, hbd, fadB, mmgB; 3-hydroxybutyryl-CoA dehydrogenase [EC:1.1.1.157]	2	0	2	0	0	4	0	0	2	1	0	2	0	2	0	0	0	0	5	0	0	1	4	1	0	0	0	0	0	0	0	5	5	0	0	0	0	0	0	0	0	0	5	1	0	0	0
K00248	Metabolism, Carbohydrate Metabolism, Butanoate metabolism, K00248 - butyryl-CoA dehydrogenase [EC:1.3.8.1]	ACADS, bcd; butyryl-CoA dehydrogenase [EC:1.3.8.1]	35	20	42	13	18	35	8	7	22	12	22	38	14	6	10	6	22	9	30	37	19	37	24	42	22	6	24	12	29	34	13	13	9	25	24	13	21	18	28	1	8	2	29	47	43	30	32
K00929	Metabolism, Carbohydrate Metabolism, Butanoate metabolism, K00929 - butyrate kinase [EC:2.7.2.7]	E2.7.2.7, buk; butyrate kinase [EC:2.7.2.7]	0	0	0	0	0	0	0	0	0	0	0	0	0	0	0	0	0	0	0	0	0	0	1	1	0	0	0	0	0	0	0	0	0	0	0	0	0	0	0	0	0	0	0	0	0	0	0
K01580	Metabolism, Carbohydrate Metabolism, Butanoate metabolism, K01580 - glutamate decarboxylase [EC:4.1.1.15]	E4.1.1.15, gadB, gadA, GAD; glutamate decarboxylase [EC:4.1.1.15]	1	0	0	0	0	0	0	4	1	0	0	2	0	0	0	0	0	0	6	0	0	0	1	3	2	0	5	0	0	0	0	0	0	0	1	0	3	0	0	0	0	0	0	0	0	2	2
K01652	Metabolism, Carbohydrate Metabolism, Butanoate metabolism, K01652 - acetolactate synthase I/II/III large subunit [EC:2.2.1.6]	E2.2.1.6L, ilvB, ilvG, ilvI; acetolactate synthase I/II/III large subunit [EC:2.2.1.6]	0	2	0	0	0	0	0	0	0	0	0	0	0	0	0	0	0	0	0	0	0	0	0	0	0	0	0	1	6	4	1	0	0	0	0	0	0	0	0	0	0	0	4	2	2	3	0
K01726	Metabolism, Carbohydrate Metabolism, Butanoate metabolism, K01726 - [EC:4.2.1.-]	E4.2.1.-; [EC:4.2.1.-]	12	9	18	1	4	8	10	10	15	9	3	12	5	11	5	6	6	8	3	4	3	3	4	4	5	4	3	4	7	7	3	6	3	0	0	4	5	6	5	5	8	5	3	2	3	4	5
K01703	Metabolism, Carbohydrate Metabolism, C5-Branched dibasic acid metabolism, K01703 - 3-isopropylmalate/(R)-2-methylmalate dehydratase large subunit [EC:4.2.1.33 4.2.1.35]	leuC; 3-isopropylmalate/(R)-2-methylmalate dehydratase large subunit [EC:4.2.1.33 4.2.1.35]	0	2	4	0	0	0	1	1	1	3	6	1	1	3	1	0	0	0	2	0	0	1	3	2	1	1	1	0	1	1	2	0	0	0	0	0	0	1	1	0	0	0	0	0	0	0	1
K04835	Metabolism, Carbohydrate Metabolism, C5-Branched dibasic acid metabolism, K04835 - methylaspartate ammonia-lyase [EC:4.3.1.2]	E4.3.1.2; methylaspartate ammonia-lyase [EC:4.3.1.2]	0	0	0	0	0	0	0	0	0	1	1	1	0	0	0	0	0	1	0	0	0	0	2	1	1	0	0	0	0	1	0	1	1	0	0	0	0	0	0	0	2	0	0	0	4	0	0
K00024	Metabolism, Carbohydrate Metabolism, Citrate cycle (TCA cycle), K00024 - malate dehydrogenase [EC:1.1.1.37]	mdh; malate dehydrogenase [EC:1.1.1.37]	4	0	2	0	0	3	0	1	1	0	1	2	2	4	0	8	5	1	3	7	2	0	0	5	2	1	1	0	1	0	1	2	3	2	1	4	0	0	1	9	10	7	19	1	0	2	1
K00031	Metabolism, Carbohydrate Metabolism, Citrate cycle (TCA cycle), K00031 - isocitrate dehydrogenase [EC:1.1.1.42]	IDH1, IDH2, icd; isocitrate dehydrogenase [EC:1.1.1.42]	2	1	1	0	0	1	0	0	1	6	4	4	5	0	7	0	0	4	5	3	4	1	1	3	3	0	2	1	4	2	2	0	3	0	2	1	2	0	1	0	4	1	3	5	6	0	1
K00174	Metabolism, Carbohydrate Metabolism, Citrate cycle (TCA cycle), K00174 - 2-oxoglutarate ferredoxin oxidoreductase subunit alpha [EC:1.2.7.3]	korA, oorA; 2-oxoglutarate ferredoxin oxidoreductase subunit alpha [EC:1.2.7.3]	6	4	4	0	10	12	1	1	2	3	10	5	3	2	0	1	2	0	8	6	9	3	2	2	3	2	4	1	4	4	4	2	4	0	3	3	2	0	3	0	5	6	3	9	3	2	4
K00175	Metabolism, Carbohydrate Metabolism, Citrate cycle (TCA cycle), K00175 - 2-oxoglutarate ferredoxin oxidoreductase subunit beta [EC:1.2.7.3]	korB, oorB; 2-oxoglutarate ferredoxin oxidoreductase subunit beta [EC:1.2.7.3]	2	0	1	0	0	2	0	3	0	6	5	2	0	3	2	0	2	2	3	3	6	0	1	1	0	0	0	0	0	0	0	0	0	0	1	1	0	0	0	2	2	5	0	2	0	0	0
K00239	Metabolism, Carbohydrate Metabolism, Citrate cycle (TCA cycle), K00239 - succinate dehydrogenase flavoprotein subunit [EC:1.3.99.1]	sdhA, frdA; succinate dehydrogenase / fumarate reductase, flavoprotein subunit [EC:1.3.5.1 1.3.5.4]	2	2	4	0	0	0	0	1	1	0	1	3	3	7	2	0	7	0	8	4	6	1	4	1	1	0	6	4	14	6	14	4	6	2	3	2	6	2	5	1	5	1	2	6	2	9	8
K00244	Metabolism, Carbohydrate Metabolism, Citrate cycle (TCA cycle), K00244 - fumarate reductase flavoprotein subunit [EC:1.3.99.1]	frdA; fumarate reductase flavoprotein subunit [EC:1.3.5.4]	15	24	18	15	18	18	11	12	13	8	9	11	11	28	14	5	6	8	12	11	14	17	23	22	7	7	9	12	12	12	9	20	12	6	8	10	10	7	7	5	19	14	17	16	12	12	6
K01643	Metabolism, Carbohydrate Metabolism, Citrate cycle (TCA cycle), K01643 - citrate lyase subunit alpha / citrate CoA-transferase [EC:4.1.3.6 2.8.3.10]	citF; citrate lyase subunit alpha / citrate CoA-transferase [EC:2.8.3.10]	0	0	0	0	0	0	0	0	0	1	0	0	0	0	0	0	1	0	0	0	0	0	0	0	0	0	0	0	0	0	0	0	0	0	0	0	0	0	0	0	0	0	0	0	0	0	0
K01647	Metabolism, Carbohydrate Metabolism, Citrate cycle (TCA cycle), K01647 - citrate synthase [EC:2.3.3.1]	CS, gltA; citrate synthase [EC:2.3.3.1]	0	0	0	0	0	0	0	0	0	0	0	0	0	0	0	0	0	0	0	0	0	0	0	0	0	0	0	0	1	0	0	0	0	0	0	0	0	0	0	0	0	0	0	0	0	0	0
K01676	Metabolism, Carbohydrate Metabolism, Citrate cycle (TCA cycle), K01676 - fumarate hydratase	E4.2.1.2A, fumA, fumB; fumarate hydratase, class I [EC:4.2.1.2]	2	1	1	0	3	2	0	0	0	0	1	0	0	1	0	0	0	0	2	3	5	2	2	1	0	0	0	4	11	6	13	2	2	0	0	1	0	0	0	0	1	1	3	2	3	0	0
K01679	Metabolism, Carbohydrate Metabolism, Citrate cycle (TCA cycle), K01679 - fumarate hydratase	E4.2.1.2B, fumC; fumarate hydratase, class II [EC:4.2.1.2]	0	0	0	0	0	0	0	0	0	0	0	0	0	0	0	0	0	0	0	0	0	0	0	0	0	0	0	0	0	0	0	0	0	0	0	0	0	0	0	0	0	0	0	1	0	0	0
K01681	Metabolism, Carbohydrate Metabolism, Citrate cycle (TCA cycle), K01681 - aconitate hydratase 1 [EC:4.2.1.3]	ACO, acnA; aconitate hydratase [EC:4.2.1.3]	0	0	1	0	0	0	0	0	0	0	1	0	0	0	0	0	0	0	1	0	0	0	2	2	0	0	0	0	1	0	1	0	0	0	0	0	0	0	0	0	0	0	2	0	0	0	0
K01682	Metabolism, Carbohydrate Metabolism, Citrate cycle (TCA cycle), K01682 - aconitate hydratase 2 / 2-methylisocitrate dehydratase [EC:4.2.1.3 4.2.1.99]	acnB; aconitate hydratase 2 / 2-methylisocitrate dehydratase [EC:4.2.1.3 4.2.1.99]	0	0	0	0	0	0	0	0	0	0	1	0	0	0	0	0	0	0	0	0	0	0	0	0	0	0	0	0	0	0	0	0	0	0	0	0	0	0	0	0	0	0	0	0	0	0	0
K01958	Metabolism, Carbohydrate Metabolism, Citrate cycle (TCA cycle), K01958 - pyruvate carboxylase [EC:6.4.1.1]	PC, pyc; pyruvate carboxylase [EC:6.4.1.1]	1	0	0	0	0	0	0	0	0	0	0	0	0	0	0	0	0	0	0	0	0	0	0	0	0	0	0	0	0	0	0	0	0	0	0	0	0	0	0	0	0	0	0	0	0	0	0
K00008	Metabolism, Carbohydrate Metabolism, Fructose and mannose metabolism, K00008 - L-iditol 2-dehydrogenase [EC:1.1.1.14]	SORD, gutB; L-iditol 2-dehydrogenase [EC:1.1.1.14]	1	3	6	2	4	3	1	3	2	8	10	6	2	1	1	1	1	2	1	7	1	10	18	18	3	1	1	2	3	2	3	1	2	1	4	2	2	1	5	2	5	3	5	13	5	5	3
K00100	Metabolism, Carbohydrate Metabolism, Fructose and mannose metabolism, K00100 - [EC:1.1.1.-]	E1.1.1.-; [EC:1.1.1.-]	10	22	17	15	23	13	9	17	21	20	21	27	18	10	17	7	10	16	32	26	44	38	37	38	19	6	15	10	20	24	12	3	8	2	15	26	15	6	6	14	10	9	23	38	25	18	9
K00754	Metabolism, Carbohydrate Metabolism, Fructose and mannose metabolism, K00754 - [EC:2.4.1.-]	E2.4.1.-; [EC:2.4.1.-]	0	0	0	0	0	0	0	0	0	0	0	0	0	0	0	0	0	0	0	0	0	0	0	0	0	0	0	0	0	0	0	0	0	0	0	0	0	0	0	0	0	0	0	0	0	1	0
K00847	Metabolism, Carbohydrate Metabolism, Fructose and mannose metabolism, K00847 - fructokinase [EC:2.7.1.4]	E2.7.1.4, scrK; fructokinase [EC:2.7.1.4]	0	0	0	0	0	0	0	0	0	3	0	2	1	0	3	0	0	0	0	0	0	0	1	0	0	0	0	0	0	0	0	0	2	0	0	0	0	0	0	0	0	0	2	0	0	0	0
K00882	Metabolism, Carbohydrate Metabolism, Fructose and mannose metabolism, K00882 - 1-phosphofructokinase [EC:2.7.1.56]	fruK; 1-phosphofructokinase [EC:2.7.1.56]	0	0	0	0	0	0	0	0	0	0	0	0	0	0	0	0	0	0	0	0	0	0	1	0	0	0	0	0	0	0	0	0	0	0	0	0	0	0	0	0	0	0	0	0	0	0	0
K00895	Metabolism, Carbohydrate Metabolism, Fructose and mannose metabolism, K00895 - pyrophosphate--fructose-6-phosphate 1-phosphotransferase [EC:2.7.1.90]	E2.7.1.90, pfk; pyrophosphate--fructose-6-phosphate 1-phosphotransferase [EC:2.7.1.90]	0	0	0	0	0	0	0	0	0	0	0	0	0	0	0	0	0	0	0	0	0	0	0	0	0	0	0	2	2	2	2	2	0	0	0	0	0	0	1	0	0	0	0	0	0	0	0
K01218	Metabolism, Carbohydrate Metabolism, Fructose and mannose metabolism, K01218 - mannan endo-1	E3.2.1.78; mannan endo-1,4-beta-mannosidase [EC:3.2.1.78]	1	1	1	0	1	2	0	0	2	0	1	1	1	3	7	0	0	0	1	3	3	0	0	0	3	0	3	0	0	0	0	0	0	0	0	1	2	4	0	0	1	0	2	3	2	2	0
K01711	Metabolism, Carbohydrate Metabolism, Fructose and mannose metabolism, K01711 - GDPmannose 4	gmd, GMDS; GDPmannose 4,6-dehydratase [EC:4.2.1.47]	4	2	2	0	0	0	0	0	0	0	0	0	1	0	1	0	0	0	0	0	0	0	0	0	0	0	0	0	0	0	0	0	0	0	0	0	0	0	0	0	0	0	0	0	0	0	0
K01809	Metabolism, Carbohydrate Metabolism, Fructose and mannose metabolism, K01809 - mannose-6-phosphate isomerase [EC:5.3.1.8]	manA, MPI; mannose-6-phosphate isomerase [EC:5.3.1.8]	0	0	1	0	0	0	0	1	0	1	0	2	0	0	0	0	0	0	2	0	1	0	2	1	1	0	1	0	0	0	0	0	0	0	1	0	0	0	0	0	0	0	1	1	1	1	0
K01813	Metabolism, Carbohydrate Metabolism, Fructose and mannose metabolism, K01813 - L-rhamnose isomerase [EC:5.3.1.14]	rhaA; L-rhamnose isomerase [EC:5.3.1.14]	15	20	14	2	16	13	5	10	11	10	19	12	8	4	7	1	1	0	14	16	13	18	16	15	13	7	16	17	27	17	14	7	8	4	12	10	14	11	13	14	15	17	8	8	8	14	9
K01818	Metabolism, Carbohydrate Metabolism, Fructose and mannose metabolism, K01818 - L-fucose isomerase [EC:5.3.1.25]	fucI; L-fucose isomerase [EC:5.3.1.25]	39	54	43	40	36	37	23	30	46	34	41	33	34	36	46	36	36	47	60	58	57	51	59	36	33	24	29	34	38	31	34	29	29	19	34	45	32	24	35	44	39	40	54	63	60	43	31
K01840	Metabolism, Carbohydrate Metabolism, Fructose and mannose metabolism, K01840 - phosphomannomutase [EC:5.4.2.8]	manB; phosphomannomutase [EC:5.4.2.8]	0	0	0	0	0	0	0	0	0	0	1	0	1	1	0	0	0	3	1	5	2	0	1	3	3	1	1	0	6	6	0	0	0	3	1	0	0	0	0	3	0	0	4	5	2	0	1
K02770	Metabolism, Carbohydrate Metabolism, Fructose and mannose metabolism, K02770 - PTS system	PTS-Fru-EIIC, fruA; PTS system, fructose-specific IIC component	0	0	0	0	1	0	0	0	0	0	0	0	0	0	0	0	0	0	0	0	0	0	0	0	0	0	0	1	0	0	0	0	0	0	0	0	0	0	0	0	0	0	0	0	0	0	0
K02796	Metabolism, Carbohydrate Metabolism, Fructose and mannose metabolism, K02796 - PTS system	PTS-Man-EIID, manZ; PTS system, mannose-specific IID component	0	0	0	0	0	0	0	0	0	0	0	0	0	0	0	0	0	0	0	0	0	0	0	0	0	0	0	0	0	0	0	0	0	0	1	1	0	0	0	0	0	0	0	0	0	0	0
K03332	Metabolism, Carbohydrate Metabolism, Fructose and mannose metabolism, K03332 - fructan beta-fructosidase [EC:3.2.1.80]	fruA; fructan beta-fructosidase [EC:3.2.1.80]	0	0	0	0	0	0	0	0	0	0	0	0	0	0	0	0	0	0	0	0	0	0	0	0	0	0	0	0	0	0	0	0	0	0	0	0	1	0	0	0	0	0	0	0	0	0	0
K00094	Metabolism, Carbohydrate Metabolism, Galactose metabolism, K00094 - galactitol-1-phosphate 5-dehydrogenase [EC:1.1.1.251]	E1.1.1.251, gatD; galactitol-1-phosphate 5-dehydrogenase [EC:1.1.1.251]	0	0	0	0	0	0	0	0	0	1	0	0	0	0	0	0	0	0	0	0	0	0	0	0	0	0	0	0	0	0	0	1	0	0	0	0	0	0	0	0	0	0	0	0	0	0	0
K00849	Metabolism, Carbohydrate Metabolism, Galactose metabolism, K00849 - galactokinase [EC:2.7.1.6]	galK; galactokinase [EC:2.7.1.6]	4	6	4	0	6	6	3	4	3	5	8	5	4	0	1	1	2	3	7	5	5	3	3	1	3	0	3	1	7	2	1	1	2	4	4	3	2	1	0	2	2	0	6	7	6	3	3
K00917	Metabolism, Carbohydrate Metabolism, Galactose metabolism, K00917 - tagatose 6-phosphate kinase [EC:2.7.1.144]	lacC; tagatose 6-phosphate kinase [EC:2.7.1.144]	3	3	3	2	1	2	3	2	1	1	2	3	0	0	0	1	0	1	2	2	2	5	5	3	0	1	0	0	2	2	0	0	0	2	3	3	2	0	0	0	0	0	2	1	2	1	0
K01182	Metabolism, Carbohydrate Metabolism, Galactose metabolism, K01182 - oligo-1	E3.2.1.10; oligo-1,6-glucosidase [EC:3.2.1.10]	3	7	2	8	10	6	9	4	8	16	21	19	14	3	11	9	4	14	20	14	16	6	5	2	2	1	3	1	10	4	4	0	1	4	11	17	4	0	1	2	4	0	11	15	17	6	4
K01187	Metabolism, Carbohydrate Metabolism, Galactose metabolism, K01187 - alpha-glucosidase [EC:3.2.1.20]	malZ; alpha-glucosidase [EC:3.2.1.20]	2	12	2	3	4	6	5	14	19	13	20	11	16	5	14	7	16	18	24	17	16	7	4	7	5	1	6	5	4	3	5	1	3	1	1	2	5	1	1	8	13	10	9	9	8	2	4
K01190	Metabolism, Carbohydrate Metabolism, Galactose metabolism, K01190 - beta-galactosidase [EC:3.2.1.23]	lacZ; beta-galactosidase [EC:3.2.1.23]	1	7	12	3	5	6	6	15	10	9	14	7	9	4	15	3	10	4	7	8	2	4	2	3	11	2	10	7	4	2	2	1	3	2	4	3	4	3	9	6	12	7	1	3	3	3	4
K01193	Metabolism, Carbohydrate Metabolism, Galactose metabolism, K01193 - beta-fructofuranosidase [EC:3.2.1.26]	E3.2.1.26, sacA; beta-fructofuranosidase [EC:3.2.1.26]	5	15	18	19	25	16	5	8	7	20	17	24	18	4	16	6	8	13	28	27	20	15	14	14	3	2	4	15	15	15	7	10	9	9	10	19	8	5	6	7	9	9	7	11	24	7	17
K01220	Metabolism, Carbohydrate Metabolism, Galactose metabolism, K01220 - 6-phospho-beta-galactosidase [EC:3.2.1.85]	E3.2.1.85, lacG; 6-phospho-beta-galactosidase [EC:3.2.1.85]	1	1	1	0	0	1	0	0	0	0	1	0	0	0	1	0	0	0	0	0	0	1	1	1	0	0	0	1	1	0	0	1	1	0	1	0	0	0	0	0	1	0	0	0	0	0	0
K01635	Metabolism, Carbohydrate Metabolism, Galactose metabolism, K01635 - tagatose 1	lacD; tagatose 1,6-diphosphate aldolase [EC:4.1.2.40]	0	0	0	0	0	0	0	0	0	0	0	0	0	0	0	0	0	0	0	0	0	0	0	0	0	0	0	0	0	0	0	0	0	0	0	0	0	0	0	0	0	0	0	0	0	0	1
K01684	Metabolism, Carbohydrate Metabolism, Galactose metabolism, K01684 - galactonate dehydratase [EC:4.2.1.6]	dgoD; galactonate dehydratase [EC:4.2.1.6]	1	1	0	0	0	0	0	0	0	0	0	0	0	0	0	0	0	0	0	0	0	0	0	0	0	0	0	0	0	0	0	0	2	0	0	0	0	0	0	0	1	0	0	0	0	0	0
K01784	Metabolism, Carbohydrate Metabolism, Galactose metabolism, K01784 - UDP-glucose 4-epimerase [EC:5.1.3.2]	galE, GALE; UDP-glucose 4-epimerase [EC:5.1.3.2]	1	0	1	0	1	0	0	1	1	1	1	2	3	0	1	0	1	1	0	0	0	0	0	2	3	1	1	3	4	1	4	3	0	3	1	1	0	0	1	0	0	1	0	1	0	0	0
K02746	Metabolism, Carbohydrate Metabolism, Galactose metabolism, K02746 - PTS system	PTS-Aga-EIIC, agaW; PTS system, N-acetylgalactosamine-specific IIC component	0	0	0	0	0	0	0	0	0	0	0	0	0	0	0	0	1	0	0	0	0	1	0	1	0	0	0	0	0	0	0	0	2	0	0	0	0	0	1	0	0	0	0	0	0	1	0
K02747	Metabolism, Carbohydrate Metabolism, Galactose metabolism, K02747 - PTS system	PTS-Aga-EIID, agaE; PTS system, N-acetylgalactosamine-specific IID component	1	0	1	0	0	0	0	0	0	0	0	0	0	0	0	0	0	0	0	0	0	0	0	0	0	0	0	0	0	0	0	0	0	0	0	0	0	0	0	0	0	0	0	0	0	0	0
K07406	Metabolism, Carbohydrate Metabolism, Galactose metabolism, K07406 - alpha-galactosidase [EC:3.2.1.22]	melA; alpha-galactosidase [EC:3.2.1.22]	0	0	0	0	0	0	0	0	0	0	0	0	0	0	0	0	0	0	0	0	0	0	0	0	0	0	0	0	0	0	0	0	0	0	0	0	0	1	0	0	0	0	0	0	0	0	0
K07407	Metabolism, Carbohydrate Metabolism, Galactose metabolism, K07407 - alpha-galactosidase [EC:3.2.1.22]	E3.2.1.22B, galA, rafA; alpha-galactosidase [EC:3.2.1.22]	7	13	8	8	3	2	1	3	5	22	29	26	10	0	11	2	6	4	11	10	11	1	2	11	9	4	11	8	7	2	3	0	0	0	6	4	5	2	4	9	10	3	8	12	5	1	1
K12308	Metabolism, Carbohydrate Metabolism, Galactose metabolism, K12308 - beta-galactosidase [EC:3.2.1.23]	bgaB, lacA; beta-galactosidase [EC:3.2.1.23]	0	2	3	13	12	14	2	0	2	9	6	2	1	0	4	0	0	6	14	11	8	2	10	1	1	1	1	5	3	6	0	2	1	1	2	3	4	0	2	4	1	5	1	6	7	1	4
Energy	Metabolism, Carbohydrate Metabolism, Glycolysis / Gluconeogenesis, Energy Metabolism, Methane metabolism, K01689 - enolase [EC:4.2.1.11]	NA	65	103	88	30	75	69	28	55	68	73	110	83	73	16	47	28	38	15	102	68	79	93	82	83	77	17	82	92	83	93	30	27	23	59	86	115	67	18	62	22	51	37	43	70	61	87	78
Energy	Metabolism, Carbohydrate Metabolism, Glycolysis / Gluconeogenesis, Energy Metabolism, Methane metabolism, K01834 - 2	NA	21	28	28	20	22	20	24	25	29	31	36	27	17	15	31	16	24	27	34	29	30	38	28	20	18	20	37	28	40	23	27	16	16	19	23	25	25	15	25	24	25	27	22	28	26	30	21
Human	Metabolism, Carbohydrate Metabolism, Glycolysis / Gluconeogenesis, Human Diseases, Neurodegenerative Diseases, Alzheimer's disease, K00134 - glyceraldehyde 3-phosphate dehydrogenase [EC:1.2.1.12]	Diseases	82	63	107	42	91	127	36	70	65	82	91	92	52	70	73	19	50	39	101	86	77	83	121	110	56	24	49	64	75	59	47	48	46	29	87	78	40	34	80	38	75	85	93	95	45	47	37
K00001	Metabolism, Carbohydrate Metabolism, Glycolysis / Gluconeogenesis, K00001 - alcohol dehydrogenase [EC:1.1.1.1]	E1.1.1.1, adh; alcohol dehydrogenase [EC:1.1.1.1]	0	0	0	0	0	1	0	0	0	0	0	0	0	0	0	0	0	0	0	0	0	0	0	0	0	0	0	0	0	0	1	1	0	0	0	0	0	0	0	0	0	0	0	0	0	0	0
K00002	Metabolism, Carbohydrate Metabolism, Glycolysis / Gluconeogenesis, K00002 - alcohol dehydrogenase (NADP+) [EC:1.1.1.2]	AKR1A1, adh; alcohol dehydrogenase (NADP+) [EC:1.1.1.2]	1	1	1	2	1	0	1	1	0	3	0	2	3	2	2	1	1	2	1	1	0	0	1	1	1	0	0	1	1	0	0	0	0	0	1	1	1	2	1	2	1	2	2	3	0	0	0
K00128	Metabolism, Carbohydrate Metabolism, Glycolysis / Gluconeogenesis, K00128 - aldehyde dehydrogenase (NAD+) [EC:1.2.1.3]	E1.2.1.3; aldehyde dehydrogenase (NAD+) [EC:1.2.1.3]	0	0	0	0	0	0	0	0	0	0	0	0	0	0	0	0	0	0	0	0	0	2	1	2	0	0	0	0	0	0	0	0	0	0	0	0	1	0	0	0	0	0	0	0	0	0	0
K00131	Metabolism, Carbohydrate Metabolism, Glycolysis / Gluconeogenesis, K00131 - glyceraldehyde-3-phosphate dehydrogenase (NADP) [EC:1.2.1.9]	gapN; glyceraldehyde-3-phosphate dehydrogenase (NADP+) [EC:1.2.1.9]	0	0	0	0	0	1	0	0	0	0	0	0	0	0	0	0	0	0	0	0	0	0	0	0	0	0	0	0	0	0	0	0	0	0	1	1	0	0	0	0	0	0	0	0	0	0	0
K00134	Metabolism, Carbohydrate Metabolism, Glycolysis / Gluconeogenesis, K00134 - glyceraldehyde 3-phosphate dehydrogenase [EC:1.2.1.12]	GAPDH, gapA; glyceraldehyde 3-phosphate dehydrogenase [EC:1.2.1.12]	0	0	0	0	0	0	0	0	0	0	0	0	1	0	0	0	0	0	0	0	0	0	0	0	0	0	0	0	0	0	0	0	0	0	0	0	1	0	0	0	0	0	0	0	0	0	0
K00150	Metabolism, Carbohydrate Metabolism, Glycolysis / Gluconeogenesis, K00150 - glyceraldehyde-3-phosphate dehydrogenase (NAD(P)) [EC:1.2.1.59]	gap2; glyceraldehyde-3-phosphate dehydrogenase (NAD(P)) [EC:1.2.1.59]	0	0	0	0	0	0	0	0	0	0	0	0	1	2	1	0	0	0	1	1	3	0	0	0	0	0	0	0	0	0	0	0	0	0	0	0	0	0	0	0	0	0	2	1	1	0	0
K00169	Metabolism, Carbohydrate Metabolism, Glycolysis / Gluconeogenesis, K00169 - pyruvate ferredoxin oxidoreductase	porA; pyruvate ferredoxin oxidoreductase, alpha subunit [EC:1.2.7.1]	0	0	0	0	0	0	0	0	0	0	0	0	0	0	0	0	0	0	0	0	0	1	0	0	1	0	2	0	0	0	0	0	0	0	0	0	0	0	0	0	0	0	0	0	0	0	0
K00382	Metabolism, Carbohydrate Metabolism, Glycolysis / Gluconeogenesis, K00382 - dihydrolipoamide dehydrogenase [EC:1.8.1.4]	DLD, lpd, pdhD; dihydrolipoamide dehydrogenase [EC:1.8.1.4]	2	3	3	0	4	4	1	3	2	1	2	2	4	9	5	4	8	4	5	5	6	2	2	1	3	1	3	1	2	0	1	1	1	0	4	2	3	1	1	5	4	3	0	3	1	5	4
K00850	Metabolism, Carbohydrate Metabolism, Glycolysis / Gluconeogenesis, K00850 - 6-phosphofructokinase 1 [EC:2.7.1.11]	pfkA, PFK; 6-phosphofructokinase 1 [EC:2.7.1.11]	1	3	4	2	6	3	2	3	3	1	1	7	4	1	2	2	3	4	7	6	4	2	1	5	9	4	5	3	5	3	4	1	4	1	2	2	3	1	3	1	2	1	3	2	1	2	0
K00873	Metabolism, Carbohydrate Metabolism, Glycolysis / Gluconeogenesis, K00873 - pyruvate kinase [EC:2.7.1.40]	PK, pyk; pyruvate kinase [EC:2.7.1.40]	0	1	1	0	1	0	0	0	0	0	0	0	0	0	0	0	2	3	0	0	0	0	0	2	0	0	0	0	0	1	0	0	0	2	2	3	0	0	0	0	0	0	0	0	0	0	0
K00927	Metabolism, Carbohydrate Metabolism, Glycolysis / Gluconeogenesis, K00927 - phosphoglycerate kinase [EC:2.7.2.3]	PGK, pgk; phosphoglycerate kinase [EC:2.7.2.3]	0	1	3	2	3	2	3	3	6	5	2	13	0	2	2	1	6	3	7	6	1	1	4	4	6	2	4	3	6	2	0	0	3	1	1	0	3	1	6	0	0	0	17	11	6	2	6
K01223	Metabolism, Carbohydrate Metabolism, Glycolysis / Gluconeogenesis, K01223 - 6-phospho-beta-glucosidase [EC:3.2.1.86]	E3.2.1.86B, bglA; 6-phospho-beta-glucosidase [EC:3.2.1.86]	0	1	0	1	0	0	1	0	1	0	0	1	0	0	0	0	0	0	0	1	0	0	0	0	0	0	0	0	2	0	0	0	0	0	0	0	0	0	0	0	0	0	0	0	1	0	0
K01596	Metabolism, Carbohydrate Metabolism, Glycolysis / Gluconeogenesis, K01596 - phosphoenolpyruvate carboxykinase (GTP) [EC:4.1.1.32]	E4.1.1.32, pckA, PEPCK; phosphoenolpyruvate carboxykinase (GTP) [EC:4.1.1.32]	2	0	3	0	2	2	0	1	1	2	2	1	0	0	0	0	0	0	5	1	0	1	3	2	0	0	5	0	2	2	5	8	4	2	2	2	0	0	0	0	3	0	2	2	2	2	1
K01610	Metabolism, Carbohydrate Metabolism, Glycolysis / Gluconeogenesis, K01610 - phosphoenolpyruvate carboxykinase (ATP) [EC:4.1.1.49]	E4.1.1.49, pckA; phosphoenolpyruvate carboxykinase (ATP) [EC:4.1.1.49]	25	30	36	10	17	27	13	20	21	26	34	36	13	4	19	13	21	27	85	32	69	70	65	72	22	11	26	21	102	77	37	31	16	60	64	72	23	12	17	15	23	16	73	79	73	57	43
K01623	Metabolism, Carbohydrate Metabolism, Glycolysis / Gluconeogenesis, K01623 - fructose-bisphosphate aldolase	ALDO; fructose-bisphosphate aldolase, class I [EC:4.1.2.13]	1	0	1	0	7	5	1	2	3	0	4	0	1	2	1	0	1	1	3	2	1	3	7	3	3	0	1	2	5	4	0	0	0	0	4	3	1	0	1	3	3	5	2	8	2	2	2
K01624	Metabolism, Carbohydrate Metabolism, Glycolysis / Gluconeogenesis, K01624 - fructose-bisphosphate aldolase	FBA, fbaA; fructose-bisphosphate aldolase, class II [EC:4.1.2.13]	0	0	1	0	0	0	0	0	0	0	0	0	0	0	1	0	2	1	0	0	0	0	0	0	0	0	0	0	2	2	0	0	0	0	0	0	0	0	0	0	0	0	0	0	0	0	0
K01689	Metabolism, Carbohydrate Metabolism, Glycolysis / Gluconeogenesis, K01689 - enolase [EC:4.2.1.11]	ENO, eno; enolase [EC:4.2.1.11]	0	1	0	0	0	0	0	0	2	1	1	1	1	0	0	0	0	0	0	0	0	2	1	0	0	0	0	0	1	0	1	0	1	0	0	0	0	0	0	0	0	0	0	0	0	0	0
K01785	Metabolism, Carbohydrate Metabolism, Glycolysis / Gluconeogenesis, K01785 - aldose 1-epimerase [EC:5.1.3.3]	galM, GALM; aldose 1-epimerase [EC:5.1.3.3]	14	14	15	7	13	8	6	6	10	18	25	25	13	7	9	11	13	17	21	23	18	4	3	6	9	6	10	20	21	16	16	12	15	4	8	15	5	3	3	15	13	10	8	13	20	7	9
K01803	Metabolism, Carbohydrate Metabolism, Glycolysis / Gluconeogenesis, K01803 - triosephosphate isomerase (TIM) [EC:5.3.1.1]	TPI, tpiA; triosephosphate isomerase (TIM) [EC:5.3.1.1]	1	1	2	0	1	1	0	0	0	0	2	0	0	0	0	0	0	0	3	0	4	0	0	0	0	0	2	1	6	2	0	1	1	0	0	2	0	0	0	0	1	1	1	1	0	0	0
K01834	Metabolism, Carbohydrate Metabolism, Glycolysis / Gluconeogenesis, K01834 - 2	PGAM, gpmA; 2,3-bisphosphoglycerate-dependent phosphoglycerate mutase [EC:5.4.2.11]	0	0	0	0	0	0	1	0	0	0	0	0	0	0	0	0	0	0	0	0	0	0	0	0	0	0	1	0	0	0	0	0	0	0	0	0	0	0	0	0	0	1	0	0	0	0	0
K01835	Metabolism, Carbohydrate Metabolism, Glycolysis / Gluconeogenesis, K01835 - phosphoglucomutase [EC:5.4.2.2]	pgm; phosphoglucomutase [EC:5.4.2.2]	0	0	0	0	0	0	0	0	0	0	0	0	0	0	0	0	0	0	0	0	0	0	0	0	0	0	0	0	0	0	0	0	0	0	0	0	0	0	0	0	0	0	0	2	0	0	0
K01895	Metabolism, Carbohydrate Metabolism, Glycolysis / Gluconeogenesis, K01895 - acetyl-CoA synthetase [EC:6.2.1.1]	ACSS, acs; acetyl-CoA synthetase [EC:6.2.1.1]	5	3	2	1	3	4	1	1	1	0	2	1	0	1	1	0	4	0	3	3	2	0	0	0	1	1	2	0	0	1	1	0	0	0	2	1	2	1	0	4	2	5	2	1	0	1	0
K03738	Metabolism, Carbohydrate Metabolism, Glycolysis / Gluconeogenesis, K03738 - aldehyde:ferredoxin oxidoreductase [EC:1.2.7.5]	aor; aldehyde:ferredoxin oxidoreductase [EC:1.2.7.5]	0	0	0	0	0	0	0	0	0	0	0	0	0	0	0	0	0	0	1	1	1	0	0	0	0	0	0	0	0	0	0	0	0	0	0	0	0	0	0	0	0	0	0	0	0	1	0
K04072	Metabolism, Carbohydrate Metabolism, Glycolysis / Gluconeogenesis, K04072 - acetaldehyde dehydrogenase / alcohol dehydrogenase [EC:1.2.1.10 1.1.1.1]	adhE; acetaldehyde dehydrogenase / alcohol dehydrogenase [EC:1.2.1.10 1.1.1.1]	1	2	3	2	4	5	1	0	3	2	10	3	4	0	15	0	3	0	5	4	1	5	9	3	0	0	1	6	4	4	3	5	3	1	1	6	0	2	1	2	7	6	0	12	3	1	6
K13954	Metabolism, Carbohydrate Metabolism, Glycolysis / Gluconeogenesis, K13954 - alcohol dehydrogenase [EC:1.1.1.1]	yiaY; alcohol dehydrogenase [EC:1.1.1.1]	0	0	0	0	0	0	0	0	0	0	0	0	0	0	0	0	0	1	0	0	1	0	0	0	0	0	0	0	0	0	0	0	0	0	0	0	1	1	0	0	0	0	1	1	0	1	0
Pentose	Metabolism, Carbohydrate Metabolism, Glycolysis / Gluconeogenesis, Pentose phosphate pathway, K01810 - glucose-6-phosphate isomerase [EC:5.3.1.9]	NA	45	56	58	39	39	40	21	36	40	60	71	61	40	25	37	28	19	56	74	56	70	45	67	60	52	17	46	30	62	55	24	17	18	32	37	52	29	15	22	30	41	20	74	69	69	55	51
K00050	Metabolism, Carbohydrate Metabolism, Glyoxylate and dicarboxylate metabolism, K00050 - hydroxypyruvate reductase [EC:1.1.1.81]	ttuD; hydroxypyruvate reductase [EC:1.1.1.81]	0	0	0	0	0	0	0	0	0	0	0	0	0	0	0	0	0	0	0	0	0	0	0	0	0	0	0	0	1	0	0	0	0	0	0	0	0	0	0	0	0	0	0	0	0	0	0
K00104	Metabolism, Carbohydrate Metabolism, Glyoxylate and dicarboxylate metabolism, K00104 - glycolate oxidase [EC:1.1.3.15]	glcD; glycolate oxidase [EC:1.1.3.15]	1	6	5	11	4	5	1	8	6	6	1	5	8	2	10	0	0	4	11	10	9	11	11	9	3	0	1	2	10	8	0	0	2	5	7	15	7	0	6	0	0	0	13	13	12	12	3
K00123	Metabolism, Carbohydrate Metabolism, Glyoxylate and dicarboxylate metabolism, K00123 - formate dehydrogenase	fdoG, fdfH; formate dehydrogenase major subunit [EC:1.2.1.2]	0	0	1	0	2	0	1	0	2	0	2	2	4	2	3	1	1	1	0	0	0	0	1	0	0	0	0	0	1	0	0	0	0	0	0	1	0	0	1	1	0	0	0	1	1	0	1
K00600	Metabolism, Carbohydrate Metabolism, Glyoxylate and dicarboxylate metabolism, K00600 - glycine hydroxymethyltransferase [EC:2.1.2.1]	glyA, SHMT; glycine hydroxymethyltransferase [EC:2.1.2.1]	1	1	2	0	0	4	0	0	2	3	6	2	3	2	2	0	1	1	4	5	2	5	5	3	2	0	4	1	3	0	0	0	1	2	1	1	1	0	3	0	0	0	2	3	1	1	1
K00865	Metabolism, Carbohydrate Metabolism, Glyoxylate and dicarboxylate metabolism, K00865 - glycerate kinase [EC:2.7.1.31]	glxK; glycerate kinase [EC:2.7.1.31]	0	0	0	0	0	0	0	0	0	0	0	0	0	0	0	0	0	0	0	0	0	0	0	0	0	0	0	0	1	0	0	0	0	0	0	0	0	0	0	0	0	0	0	0	0	0	0
K01847	Metabolism, Carbohydrate Metabolism, Glyoxylate and dicarboxylate metabolism, K01847 - methylmalonyl-CoA mutase [EC:5.4.99.2]	MUT; methylmalonyl-CoA mutase [EC:5.4.99.2]	1	0	0	0	0	0	0	4	7	0	6	2	3	2	1	4	12	11	11	6	15	2	5	5	3	1	6	1	13	1	2	6	3	0	1	1	12	2	2	1	4	1	12	7	4	18	4
K01915	Metabolism, Carbohydrate Metabolism, Glyoxylate and dicarboxylate metabolism, K01915 - glutamine synthetase [EC:6.3.1.2]	glnA, GLUL; glutamine synthetase [EC:6.3.1.2]	5	7	7	19	19	18	6	5	7	13	11	10	6	2	9	1	0	1	22	9	10	14	13	11	0	0	0	13	12	8	3	0	2	6	13	11	3	2	2	6	4	7	9	19	13	7	13
K01965	Metabolism, Carbohydrate Metabolism, Glyoxylate and dicarboxylate metabolism, K01965 - propionyl-CoA carboxylase alpha chain [EC:6.4.1.3]	PCCA, pccA; propionyl-CoA carboxylase alpha chain [EC:6.4.1.3]	0	0	0	0	0	0	0	0	0	0	0	0	0	0	0	0	0	0	0	0	0	0	0	0	0	0	0	0	0	0	0	0	0	0	0	0	0	0	0	0	0	0	0	1	0	0	0
K01966	Metabolism, Carbohydrate Metabolism, Glyoxylate and dicarboxylate metabolism, K01966 - propionyl-CoA carboxylase beta chain [EC:6.4.1.3]	PCCB, pccB; propionyl-CoA carboxylase beta chain [EC:6.4.1.3]	0	0	0	0	0	0	0	0	0	0	0	0	0	0	0	0	0	0	7	3	11	0	0	3	0	0	1	0	6	1	0	3	2	0	0	0	1	0	0	0	0	0	5	3	0	0	1
K03781	Metabolism, Carbohydrate Metabolism, Glyoxylate and dicarboxylate metabolism, K03781 - catalase [EC:1.11.1.6]	katE, CAT, catB, srpA; catalase [EC:1.11.1.6]	3	2	1	0	1	1	0	3	0	4	9	4	2	1	2	4	3	2	3	4	3	0	0	1	0	0	1	1	1	0	0	0	1	0	0	0	1	2	1	2	2	3	2	0	0	3	1
K07130	Metabolism, Carbohydrate Metabolism, Glyoxylate and dicarboxylate metabolism, K07130 - arylformamidase [EC:3.5.1.9]	kynB; arylformamidase [EC:3.5.1.9]	0	0	0	0	0	0	0	0	1	0	0	0	0	0	0	0	2	0	0	1	0	0	1	0	0	0	0	0	0	0	0	0	1	0	0	0	0	0	0	0	0	0	0	1	0	0	0
K00010	Metabolism, Carbohydrate Metabolism, Inositol phosphate metabolism, K00010 - myo-inositol 2-dehydrogenase [EC:1.1.1.18]	iolG; myo-inositol 2-dehydrogenase / D-chiro-inositol 1-dehydrogenase [EC:1.1.1.18 1.1.1.369]	0	1	0	0	0	0	0	0	0	0	0	1	0	0	0	0	0	0	0	0	0	0	0	1	1	0	1	0	0	0	0	0	0	0	0	0	0	0	0	0	0	0	0	0	0	0	0
K01092	Metabolism, Carbohydrate Metabolism, Inositol phosphate metabolism, K01092 - myo-inositol-1(or 4)-monophosphatase [EC:3.1.3.25]	E3.1.3.25, IMPA, suhB; myo-inositol-1(or 4)-monophosphatase [EC:3.1.3.25]	0	0	1	0	0	0	0	0	0	0	0	1	0	0	0	0	0	0	0	0	0	0	0	0	0	0	0	0	0	0	0	0	0	0	0	0	0	0	0	0	0	1	0	0	0	0	0
K01858	Metabolism, Carbohydrate Metabolism, Inositol phosphate metabolism, K01858 - myo-inositol-1-phosphate synthase [EC:5.5.1.4]	E5.5.1.4, INO1; myo-inositol-1-phosphate synthase [EC:5.5.1.4]	4	3	0	0	3	3	2	1	5	2	6	3	1	2	0	2	3	2	8	8	13	3	3	5	3	2	3	0	7	3	1	1	0	0	5	5	5	3	3	6	6	10	2	2	1	7	4
K03336	Metabolism, Carbohydrate Metabolism, Inositol phosphate metabolism, K03336 - 3D-(3	iolD; 3D-(3,5/4)-trihydroxycyclohexane-1,2-dione acylhydrolase (decyclizing) [EC:3.7.1.22]	0	1	1	0	0	0	1	0	0	0	0	2	0	0	0	0	0	0	0	3	0	0	1	0	2	0	0	0	0	0	0	0	0	0	0	0	0	0	0	0	0	0	1	0	0	0	0
K00040	Metabolism, Carbohydrate Metabolism, Pentose and glucuronate interconversions, K00040 - fructuronate reductase [EC:1.1.1.57]	uxuB; fructuronate reductase [EC:1.1.1.57]	0	0	0	3	0	0	0	0	0	0	0	2	0	0	0	0	0	0	0	0	0	0	1	0	0	0	0	0	0	0	1	0	0	0	0	0	0	0	0	0	0	0	0	0	0	0	0
K00041	Metabolism, Carbohydrate Metabolism, Pentose and glucuronate interconversions, K00041 - tagaturonate reductase [EC:1.1.1.58]	uxaB; tagaturonate reductase [EC:1.1.1.58]	0	2	0	0	0	0	0	0	0	0	0	1	0	0	0	0	0	0	1	0	2	0	0	1	2	0	3	2	9	7	0	0	0	1	2	0	0	0	1	1	1	0	10	5	2	1	2
K00848	Metabolism, Carbohydrate Metabolism, Pentose and glucuronate interconversions, K00848 - rhamnulokinase [EC:2.7.1.5]	rhaB; rhamnulokinase [EC:2.7.1.5]	0	0	0	0	0	0	0	0	0	0	0	0	0	0	0	0	0	0	0	0	0	0	0	0	0	0	0	0	0	0	0	0	0	0	0	0	0	0	0	0	0	0	1	0	0	0	0
K00853	Metabolism, Carbohydrate Metabolism, Pentose and glucuronate interconversions, K00853 - L-ribulokinase [EC:2.7.1.16]	araB; L-ribulokinase [EC:2.7.1.16]	0	0	0	1	2	3	0	0	0	0	0	0	0	0	1	0	0	0	0	0	0	2	3	0	0	0	0	0	2	0	2	0	1	0	0	2	0	0	0	1	0	0	0	1	3	0	0
K00854	Metabolism, Carbohydrate Metabolism, Pentose and glucuronate interconversions, K00854 - xylulokinase [EC:2.7.1.17]	xylB, XYLB; xylulokinase [EC:2.7.1.17]	13	9	6	7	14	9	7	4	6	12	13	15	11	4	17	4	10	10	14	11	15	10	10	8	6	6	10	7	9	5	5	3	4	6	4	11	5	0	2	4	12	7	12	20	17	4	7
K01051	Metabolism, Carbohydrate Metabolism, Pentose and glucuronate interconversions, K01051 - pectinesterase [EC:3.1.1.11]	E3.1.1.11; pectinesterase [EC:3.1.1.11]	0	0	0	0	0	0	0	2	1	0	0	0	0	0	0	0	0	0	1	0	0	0	0	0	0	0	0	6	9	7	3	0	0	0	0	0	0	0	0	8	7	8	0	0	0	0	0
K01195	Metabolism, Carbohydrate Metabolism, Pentose and glucuronate interconversions, K01195 - beta-glucuronidase [EC:3.2.1.31]	uidA, GUSB; beta-glucuronidase [EC:3.2.1.31]	1	1	1	1	2	0	0	0	0	0	0	1	1	0	1	2	0	1	1	1	2	0	0	0	0	0	0	1	0	1	0	0	0	0	1	1	0	0	0	0	0	0	1	0	0	1	1
K01213	Metabolism, Carbohydrate Metabolism, Pentose and glucuronate interconversions, K01213 - galacturan 1	E3.2.1.67; galacturan 1,4-alpha-galacturonidase [EC:3.2.1.67]	0	0	0	0	0	0	0	0	0	0	0	0	0	0	0	0	0	0	0	0	0	0	0	0	0	0	0	0	0	1	1	0	0	0	0	0	0	0	0	0	0	0	0	0	0	0	0
K01685	Metabolism, Carbohydrate Metabolism, Pentose and glucuronate interconversions, K01685 - altronate hydrolase [EC:4.2.1.7]	uxaA; altronate hydrolase [EC:4.2.1.7]	0	1	1	0	0	0	0	0	0	0	0	0	0	0	0	0	0	0	0	2	1	0	0	0	0	0	0	0	0	0	0	0	0	0	0	0	0	0	0	0	0	0	0	0	0	0	0
K01686	Metabolism, Carbohydrate Metabolism, Pentose and glucuronate interconversions, K01686 - mannonate dehydratase [EC:4.2.1.8]	uxuA; mannonate dehydratase [EC:4.2.1.8]	0	0	0	0	0	0	0	0	0	0	0	0	0	0	0	0	0	0	0	0	0	0	0	0	0	0	0	0	2	1	2	0	1	0	0	0	0	0	0	0	0	0	0	0	0	0	0
K01786	Metabolism, Carbohydrate Metabolism, Pentose and glucuronate interconversions, K01786 - L-ribulose-5-phosphate 4-epimerase [EC:5.1.3.4]	araD; L-ribulose-5-phosphate 4-epimerase [EC:5.1.3.4]	0	0	0	0	0	0	0	0	0	1	0	0	0	0	0	0	0	0	0	0	0	0	0	0	0	0	0	0	0	0	0	0	0	0	0	0	0	0	0	0	0	0	0	0	0	0	0
K01804	Metabolism, Carbohydrate Metabolism, Pentose and glucuronate interconversions, K01804 - L-arabinose isomerase [EC:5.3.1.4]	araA; L-arabinose isomerase [EC:5.3.1.4]	36	45	39	44	47	41	29	39	48	39	46	34	38	28	52	17	16	24	42	41	43	38	44	38	34	31	32	55	59	48	36	28	39	23	28	40	32	32	22	40	47	48	41	79	57	31	37
K01805	Metabolism, Carbohydrate Metabolism, Pentose and glucuronate interconversions, K01805 - xylose isomerase [EC:5.3.1.5]	xylA; xylose isomerase [EC:5.3.1.5]	27	26	32	40	36	51	15	23	35	29	32	24	17	18	25	2	5	5	30	31	35	34	39	22	7	4	10	22	15	21	1	3	1	15	29	43	26	22	24	16	28	30	43	60	59	28	29
K01812	Metabolism, Carbohydrate Metabolism, Pentose and glucuronate interconversions, K01812 - glucuronate isomerase [EC:5.3.1.12]	uxaC; glucuronate isomerase [EC:5.3.1.12]	31	41	36	8	34	45	13	21	25	36	39	33	22	33	26	12	30	31	32	33	31	46	59	41	18	16	27	20	27	30	39	25	36	4	24	21	30	24	13	42	41	35	28	44	39	36	18
K01815	Metabolism, Carbohydrate Metabolism, Pentose and glucuronate interconversions, K01815 - 4-deoxy-L-threo-5-hexosulose-uronate ketol-isomerase [EC:5.3.1.17]	kduI; 4-deoxy-L-threo-5-hexosulose-uronate ketol-isomerase [EC:5.3.1.17]	0	0	0	0	0	0	0	0	0	0	0	0	0	0	0	0	0	0	0	0	0	0	0	0	0	0	0	0	0	0	0	0	1	0	0	0	0	0	0	0	0	0	0	0	0	0	0
K00033	Metabolism, Carbohydrate Metabolism, Pentose phosphate pathway, K00033 - 6-phosphogluconate dehydrogenase [EC:1.1.1.44]	PGD, gnd; 6-phosphogluconate dehydrogenase [EC:1.1.1.44]	0	0	0	0	0	0	0	0	0	0	0	0	0	0	0	0	0	0	0	0	0	0	0	0	0	0	0	0	0	0	0	0	0	0	0	0	0	0	0	0	0	0	1	1	0	0	0
K00615	Metabolism, Carbohydrate Metabolism, Pentose phosphate pathway, K00615 - transketolase [EC:2.2.1.1]	E2.2.1.1, tktA, tktB; transketolase [EC:2.2.1.1]	5	5	12	13	14	4	3	9	12	15	6	10	10	3	16	2	6	1	12	10	10	8	17	16	3	0	1	9	25	15	0	0	2	7	14	29	6	1	4	8	13	15	15	17	16	3	14
K00616	Metabolism, Carbohydrate Metabolism, Pentose phosphate pathway, K00616 - transaldolase [EC:2.2.1.2]	E2.2.1.2, talA, talB; transaldolase [EC:2.2.1.2]	0	1	0	4	3	6	0	0	0	3	2	4	0	0	2	0	0	1	7	1	1	3	2	1	0	0	0	3	3	7	0	0	0	1	0	5	1	1	0	0	1	3	6	3	8	0	6
K00852	Metabolism, Carbohydrate Metabolism, Pentose phosphate pathway, K00852 - ribokinase [EC:2.7.1.15]	rbsK, RBKS; ribokinase [EC:2.7.1.15]	0	0	0	0	0	0	0	0	0	0	0	1	0	0	0	0	0	0	0	0	0	0	0	0	0	0	0	0	0	0	0	0	1	0	0	0	0	0	0	0	0	0	0	0	0	0	0
K00874	Metabolism, Carbohydrate Metabolism, Pentose phosphate pathway, K00874 - 2-dehydro-3-deoxygluconokinase [EC:2.7.1.45]	kdgK; 2-dehydro-3-deoxygluconokinase [EC:2.7.1.45]	21	17	23	17	20	20	7	12	15	13	14	21	20	11	9	9	11	18	32	32	27	10	25	29	18	20	7	11	11	10	6	12	11	17	25	25	14	2	5	25	15	23	31	19	13	11	3
K00948	Metabolism, Carbohydrate Metabolism, Pentose phosphate pathway, K00948 - ribose-phosphate pyrophosphokinase [EC:2.7.6.1]	PRPS, prsA; ribose-phosphate pyrophosphokinase [EC:2.7.6.1]	0	0	0	0	0	0	0	0	0	0	0	0	0	0	0	0	0	0	0	0	0	0	0	0	0	0	0	0	0	0	0	0	0	0	0	0	0	0	0	0	0	0	1	0	0	0	0
K01621	Metabolism, Carbohydrate Metabolism, Pentose phosphate pathway, K01621 - phosphoketolase [EC:4.1.2.9]	E4.1.2.9; phosphoketolase [EC:4.1.2.9]	0	0	0	0	0	1	0	0	0	0	0	0	0	0	0	0	0	0	0	0	0	1	0	1	0	0	0	0	0	0	0	0	0	0	0	0	0	0	0	0	0	0	0	0	0	0	0
K01625	Metabolism, Carbohydrate Metabolism, Pentose phosphate pathway, K01625 - 2-dehydro-3-deoxyphosphogluconate aldolase / 4-hydroxy-2-oxoglutarate aldolase [EC:4.1.2.14 4.1.3.16]	eda; 2-dehydro-3-deoxyphosphogluconate aldolase / (4S)-4-hydroxy-2-oxoglutarate aldolase [EC:4.1.2.14 4.1.3.42]	0	0	0	0	0	0	0	0	0	0	0	0	0	0	0	0	0	0	0	0	0	0	0	0	0	0	0	0	0	0	0	0	1	0	0	0	0	0	0	0	0	0	1	0	0	0	0
K01839	Metabolism, Carbohydrate Metabolism, Pentose phosphate pathway, K01839 - phosphopentomutase [EC:5.4.2.7]	deoB; phosphopentomutase [EC:5.4.2.7]	0	0	1	0	0	0	0	0	0	0	1	0	0	0	0	0	0	0	0	0	0	0	0	1	1	0	1	0	1	2	0	2	0	2	1	1	0	0	0	0	0	0	0	0	0	2	2
K00140	Metabolism, Carbohydrate Metabolism, Propanoate metabolism, K00140 - malonate-semialdehyde dehydrogenase (acetylating) / methylmalonate-semialdehyde dehydrogenase [EC:1.2.1.18 1.2.1.27]	mmsA, iolA, ALDH6A1; malonate-semialdehyde dehydrogenase (acetylating) / methylmalonate-semialdehyde dehydrogenase [EC:1.2.1.18 1.2.1.27]	3	5	2	0	3	1	0	0	0	4	4	4	0	0	0	0	0	0	1	1	0	1	3	2	3	3	4	0	0	0	1	0	0	0	0	0	0	3	0	1	1	2	1	1	0	0	0
K00249	Metabolism, Carbohydrate Metabolism, Propanoate metabolism, K00249 - acyl-CoA dehydrogenase [EC:1.3.8.7]	ACADM, acd; acyl-CoA dehydrogenase [EC:1.3.8.7]	0	0	0	0	0	0	0	0	0	0	0	0	0	0	0	0	1	0	0	0	0	0	0	0	0	0	0	0	0	0	0	0	0	0	0	0	0	0	0	0	0	0	0	0	0	0	0
K00823	Metabolism, Carbohydrate Metabolism, Propanoate metabolism, K00823 - 4-aminobutyrate aminotransferase [EC:2.6.1.19]	puuE; 4-aminobutyrate aminotransferase [EC:2.6.1.19]	0	0	0	0	0	0	1	0	1	0	0	0	0	0	0	0	0	0	0	0	0	0	0	0	0	0	0	0	0	0	0	0	0	2	0	0	0	0	0	0	0	0	0	0	0	0	0
K01848	Metabolism, Carbohydrate Metabolism, Propanoate metabolism, K01848 - methylmalonyl-CoA mutase	E5.4.99.2A, mcmA1; methylmalonyl-CoA mutase, N-terminal domain [EC:5.4.99.2]	4	2	1	0	2	3	0	1	0	3	0	0	2	0	5	0	0	0	7	3	8	1	2	0	2	0	1	6	6	5	13	11	11	0	0	0	2	1	5	0	1	2	3	3	7	3	1
K03417	Metabolism, Carbohydrate Metabolism, Propanoate metabolism, K03417 - methylisocitrate lyase [EC:4.1.3.30]	prpB; methylisocitrate lyase [EC:4.1.3.30]	0	0	0	0	0	0	0	0	0	0	0	0	0	0	0	0	0	0	0	0	0	0	0	0	0	0	0	0	0	0	0	0	1	0	0	0	0	0	0	0	0	0	0	0	0	0	0
K07250	Metabolism, Carbohydrate Metabolism, Propanoate metabolism, K07250 - 4-aminobutyrate aminotransferase / (S)-3-amino-2-methylpropionate transaminase [EC:2.6.1.19 2.6.1.22]	gabT; 4-aminobutyrate aminotransferase / (S)-3-amino-2-methylpropionate transaminase [EC:2.6.1.19 2.6.1.22]	0	0	2	0	0	1	0	0	0	0	0	0	0	0	0	0	0	0	0	0	0	0	0	0	0	0	1	0	0	0	0	0	0	0	0	0	0	0	0	0	0	0	0	0	0	0	0
K00027	Metabolism, Carbohydrate Metabolism, Pyruvate metabolism, K00027 - malate dehydrogenase (oxaloacetate-decarboxylating) [EC:1.1.1.38]	ME2, sfcA, maeA; malate dehydrogenase (oxaloacetate-decarboxylating) [EC:1.1.1.38]	0	0	0	0	1	0	1	0	0	0	0	0	0	0	0	0	0	0	0	0	0	0	0	0	0	0	0	0	0	0	0	0	0	0	0	0	0	0	0	0	0	0	0	0	0	0	0
K00029	Metabolism, Carbohydrate Metabolism, Pyruvate metabolism, K00029 - malate dehydrogenase (oxaloacetate-decarboxylating)(NADP+) [EC:1.1.1.40]	E1.1.1.40, maeB; malate dehydrogenase (oxaloacetate-decarboxylating)(NADP+) [EC:1.1.1.40]	0	0	0	0	0	0	0	0	0	0	0	0	0	0	0	0	0	0	0	0	0	0	0	0	0	0	0	0	0	1	0	0	0	0	0	0	0	0	0	0	0	0	1	0	0	2	2
K00048	Metabolism, Carbohydrate Metabolism, Pyruvate metabolism, K00048 - lactaldehyde reductase [EC:1.1.1.77]	fucO; lactaldehyde reductase [EC:1.1.1.77]	1	5	5	1	6	4	2	7	3	1	2	5	3	0	0	3	3	5	7	4	2	3	1	3	4	2	4	2	2	2	1	1	0	4	6	5	4	0	1	9	1	5	5	12	2	3	1
K00116	Metabolism, Carbohydrate Metabolism, Pyruvate metabolism, K00116 - malate dehydrogenase (quinone) [EC:1.1.5.4]	mqo; malate dehydrogenase (quinone) [EC:1.1.5.4]	0	0	0	0	0	0	0	0	0	0	0	0	0	0	0	0	0	0	0	0	0	0	0	0	0	0	0	0	0	0	0	0	0	0	0	0	0	0	0	0	0	0	0	0	0	0	0
K00625	Metabolism, Carbohydrate Metabolism, Pyruvate metabolism, K00625 - phosphate acetyltransferase [EC:2.3.1.8]	E2.3.1.8, pta; phosphate acetyltransferase [EC:2.3.1.8]	9	14	11	1	9	11	1	3	5	6	11	9	8	1	7	1	5	10	20	12	13	11	15	17	16	0	10	5	18	12	8	9	9	13	16	15	7	2	8	3	6	5	29	19	14	13	11
K00626	Metabolism, Carbohydrate Metabolism, Pyruvate metabolism, K00626 - acetyl-CoA C-acetyltransferase [EC:2.3.1.9]	E2.3.1.9, atoB; acetyl-CoA C-acetyltransferase [EC:2.3.1.9]	36	35	45	23	55	61	15	20	41	35	44	60	29	8	18	19	34	37	59	47	42	64	62	71	34	15	39	35	55	53	36	27	36	27	31	33	53	28	35	14	25	21	72	82	87	44	25
K00656	Metabolism, Carbohydrate Metabolism, Pyruvate metabolism, K00656 - formate C-acetyltransferase [EC:2.3.1.54]	E2.3.1.54, pflD; formate C-acetyltransferase [EC:2.3.1.54]	23	34	41	3	34	23	16	24	26	19	40	25	26	4	28	13	10	21	31	29	18	47	60	37	26	14	38	22	44	33	18	22	16	17	31	49	12	12	23	8	32	17	13	27	23	30	24
K00925	Metabolism, Carbohydrate Metabolism, Pyruvate metabolism, K00925 - acetate kinase [EC:2.7.2.1]	ackA; acetate kinase [EC:2.7.2.1]	13	7	12	1	11	14	1	8	8	11	19	22	6	0	2	7	19	13	27	15	11	14	21	19	8	4	10	12	16	26	2	15	7	7	13	10	7	5	9	1	10	4	21	16	25	21	17
K01006	Metabolism, Carbohydrate Metabolism, Pyruvate metabolism, K01006 - pyruvate	ppdK; pyruvate, orthophosphate dikinase [EC:2.7.9.1]	0	0	0	0	0	0	0	0	0	0	0	0	0	0	0	0	0	0	4	0	1	0	1	17	2	0	1	0	10	17	0	0	0	3	0	0	1	0	4	0	0	0	41	26	2	0	18
K01007	Metabolism, Carbohydrate Metabolism, Pyruvate metabolism, K01007 - pyruvate	pps, ppsA; pyruvate, water dikinase [EC:2.7.9.2]	0	0	0	0	0	0	0	0	0	1	0	0	0	0	0	0	0	0	0	0	0	0	0	0	0	0	0	0	0	0	0	0	0	0	0	0	0	0	0	0	0	0	0	0	0	0	0
K01026	Metabolism, Carbohydrate Metabolism, Pyruvate metabolism, K01026 - propionate CoA-transferase [EC:2.8.3.1]	pct; propionate CoA-transferase [EC:2.8.3.1]	6	5	8	4	7	8	1	2	5	5	3	7	2	2	2	2	5	3	1	6	5	2	5	4	2	2	5	1	5	2	0	1	2	1	1	2	3	4	2	4	6	5	1	1	3	6	5
K01067	Metabolism, Carbohydrate Metabolism, Pyruvate metabolism, K01067 - acetyl-CoA hydrolase [EC:3.1.2.1]	E3.1.2.1, ACH1; acetyl-CoA hydrolase [EC:3.1.2.1]	0	1	1	0	1	2	0	0	0	1	0	0	0	2	0	0	1	1	3	2	5	1	0	0	0	0	0	5	6	3	9	7	5	0	1	1	0	0	2	2	0	1	0	4	3	1	0
K01961	Metabolism, Carbohydrate Metabolism, Pyruvate metabolism, K01961 - acetyl-CoA carboxylase	accC; acetyl-CoA carboxylase, biotin carboxylase subunit [EC:6.4.1.2 6.3.4.14]	0	0	0	0	1	0	0	0	0	0	0	0	0	0	0	0	0	0	0	0	0	0	0	0	0	0	0	0	0	0	0	0	0	0	0	0	0	0	0	0	0	0	0	0	0	0	0
K04021	Metabolism, Carbohydrate Metabolism, Pyruvate metabolism, K04021 - aldehyde dehydrogenase	eutE; aldehyde dehydrogenase	4	6	6	2	3	4	2	2	1	2	1	4	2	1	4	1	1	1	3	3	1	2	1	1	3	0	3	3	1	2	2	1	1	2	1	2	1	2	3	1	1	3	2	1	4	3	1
K07248	Metabolism, Carbohydrate Metabolism, Pyruvate metabolism, K07248 - lactaldehyde dehydrogenase / glycolaldehyde dehydrogenase [EC:1.2.1.22 1.2.1.21]	aldA; lactaldehyde dehydrogenase / glycolaldehyde dehydrogenase [EC:1.2.1.22 1.2.1.21]	2	3	2	0	0	2	1	4	2	1	6	4	5	2	2	0	0	0	13	11	9	1	1	0	6	2	5	0	0	0	0	0	0	0	3	3	7	3	2	5	3	6	1	1	1	3	1
K13788	Metabolism, Carbohydrate Metabolism, Pyruvate metabolism, K13788 - phosphate acetyltransferase [EC:2.3.1.8]	pta; phosphate acetyltransferase [EC:2.3.1.8]	0	0	0	0	0	0	0	0	0	0	0	0	0	0	0	0	0	0	0	0	0	0	0	0	0	0	0	0	0	0	0	0	1	0	0	0	0	0	0	0	0	0	0	0	0	0	0
K00688	Metabolism, Carbohydrate Metabolism, Starch and sucrose metabolism, K00688 - starch phosphorylase [EC:2.4.1.1]	E2.4.1.1, glgP, PYG; starch phosphorylase [EC:2.4.1.1]	2	2	4	4	1	3	1	1	2	10	14	9	5	0	12	2	3	11	13	10	6	9	12	15	10	2	7	3	23	6	0	0	2	4	1	10	2	0	2	3	6	1	4	10	3	0	19
K00690	Metabolism, Carbohydrate Metabolism, Starch and sucrose metabolism, K00690 - sucrose phosphorylase [EC:2.4.1.7]	E2.4.1.7; sucrose phosphorylase [EC:2.4.1.7]	0	0	2	3	1	1	0	0	0	2	1	0	0	0	1	0	0	0	3	2	1	1	1	1	0	0	0	2	2	1	0	0	0	1	1	1	0	0	2	0	0	0	1	1	0	1	1
K00700	Metabolism, Carbohydrate Metabolism, Starch and sucrose metabolism, K00700 - 1	glgB; 1,4-alpha-glucan branching enzyme [EC:2.4.1.18]	0	1	0	0	0	0	0	0	0	2	2	1	3	0	3	0	0	0	0	1	0	1	0	0	1	0	0	0	1	1	0	0	0	0	1	0	0	0	0	0	1	0	0	0	0	1	0
K00702	Metabolism, Carbohydrate Metabolism, Starch and sucrose metabolism, K00702 - cellobiose phosphorylase [EC:2.4.1.20]	E2.4.1.20; cellobiose phosphorylase [EC:2.4.1.20]	0	6	9	5	9	11	8	8	11	10	9	13	7	8	7	0	0	0	8	11	7	16	15	9	11	1	17	5	7	11	13	3	3	2	10	9	1	1	1	10	10	6	7	6	10	6	2
K00703	Metabolism, Carbohydrate Metabolism, Starch and sucrose metabolism, K00703 - starch synthase [EC:2.4.1.21]	E2.4.1.21, glgA; starch synthase [EC:2.4.1.21]	0	0	0	1	1	2	0	1	1	0	0	2	0	1	0	0	0	0	0	0	0	3	1	0	0	1	0	0	1	1	1	0	0	0	0	0	0	1	2	0	0	0	0	1	1	0	0
K00705	Metabolism, Carbohydrate Metabolism, Starch and sucrose metabolism, K00705 - 4-alpha-glucanotransferase [EC:2.4.1.25]	malQ; 4-alpha-glucanotransferase [EC:2.4.1.25]	0	0	0	0	0	0	0	0	0	0	0	0	0	0	0	0	0	1	0	0	0	0	0	0	0	0	0	0	1	0	2	0	0	0	0	0	0	0	0	0	0	0	0	0	0	0	0
K00975	Metabolism, Carbohydrate Metabolism, Starch and sucrose metabolism, K00975 - glucose-1-phosphate adenylyltransferase [EC:2.7.7.27]	glgC; glucose-1-phosphate adenylyltransferase [EC:2.7.7.27]	0	0	0	0	0	0	0	0	0	0	0	0	0	0	0	0	0	0	2	0	0	0	1	0	0	0	0	0	1	0	0	0	0	0	0	0	0	0	0	0	0	1	0	0	0	0	0
K01176	Metabolism, Carbohydrate Metabolism, Starch and sucrose metabolism, K01176 - alpha-amylase [EC:3.2.1.1]	E3.2.1.1, amyA, malS; alpha-amylase [EC:3.2.1.1]	24	28	30	17	21	18	0	0	0	28	28	20	27	27	30	0	0	0	1	0	1	52	36	33	0	0	0	4	3	1	0	0	0	0	0	22	27	18	17	0	1	1	1	1	1	18	24
K01179	Metabolism, Carbohydrate Metabolism, Starch and sucrose metabolism, K01179 - endoglucanase [EC:3.2.1.4]	E3.2.1.4; endoglucanase [EC:3.2.1.4]	0	0	0	0	0	0	1	1	1	1	0	1	0	0	0	0	1	0	2	0	0	0	0	0	0	0	0	0	1	0	3	0	1	0	0	0	0	0	0	0	0	0	3	0	3	0	0
K01188	Metabolism, Carbohydrate Metabolism, Starch and sucrose metabolism, K01188 - beta-glucosidase [EC:3.2.1.21]	E3.2.1.21; beta-glucosidase [EC:3.2.1.21]	4	9	15	6	6	6	7	6	11	10	9	6	8	5	18	11	9	7	11	9	10	9	15	8	8	6	10	6	6	3	6	4	2	1	2	4	3	3	2	6	5	9	3	8	6	4	8
K01198	Metabolism, Carbohydrate Metabolism, Starch and sucrose metabolism, K01198 - xylan 1	xynB; xylan 1,4-beta-xylosidase [EC:3.2.1.37]	2	4	5	13	3	5	7	6	9	11	5	7	0	1	3	6	9	9	2	2	3	5	6	5	4	2	3	0	0	4	0	0	0	5	9	15	7	2	4	1	1	2	9	15	6	5	4
K01212	Metabolism, Carbohydrate Metabolism, Starch and sucrose metabolism, K01212 - levanase [EC:3.2.1.65]	sacC; levanase [EC:3.2.1.65]	0	0	0	0	1	0	0	0	0	0	1	0	0	0	0	0	1	0	0	0	0	0	0	0	0	0	0	2	2	1	1	0	1	0	0	0	0	0	0	0	0	0	0	0	0	0	0
K01225	Metabolism, Carbohydrate Metabolism, Starch and sucrose metabolism, K01225 - cellulose 1	E3.2.1.91; cellulose 1,4-beta-cellobiosidase [EC:3.2.1.91]	0	0	0	0	0	0	0	0	0	0	0	0	0	0	0	0	0	0	0	0	0	1	0	0	0	0	0	0	0	0	0	0	0	0	1	0	0	0	0	0	0	0	0	0	0	0	0
K01838	Metabolism, Carbohydrate Metabolism, Starch and sucrose metabolism, K01838 - beta-phosphoglucomutase [EC:5.4.2.6]	pgmB; beta-phosphoglucomutase [EC:5.4.2.6]	0	0	0	0	0	0	0	0	1	0	0	0	0	0	0	0	0	0	0	0	0	0	0	0	0	0	0	0	0	0	0	0	0	0	0	0	0	0	0	0	0	0	0	0	0	0	0
K02438	Metabolism, Carbohydrate Metabolism, Starch and sucrose metabolism, K02438 - glycogen operon protein [EC:3.2.1.-]	treX, glgX; glycogen operon protein [EC:3.2.1.-]	0	0	0	0	0	0	0	0	0	0	0	0	0	0	0	0	0	0	0	0	0	0	0	0	0	0	0	0	1	0	0	0	0	0	0	0	0	0	0	0	0	0	0	0	0	0	0
K05341	Metabolism, Carbohydrate Metabolism, Starch and sucrose metabolism, K05341 - amylosucrase [EC:2.4.1.4]	E2.4.1.4; amylosucrase [EC:2.4.1.4]	0	1	0	0	0	0	0	0	0	0	0	0	0	0	0	0	0	0	0	1	0	0	0	0	0	0	0	0	0	0	0	0	0	0	0	0	0	0	0	0	0	0	0	0	0	1	0
K05343	Metabolism, Carbohydrate Metabolism, Starch and sucrose metabolism, K05343 - maltose alpha-D-glucosyltransferase/ alpha-amylase [EC:5.4.99.16 3.2.1.1]	treS; maltose alpha-D-glucosyltransferase/ alpha-amylase [EC:5.4.99.16 3.2.1.1]	0	0	0	1	0	1	0	0	0	3	2	2	0	0	1	0	0	0	0	0	0	0	3	1	0	0	2	0	0	0	0	0	0	0	0	0	0	1	0	0	1	0	0	3	0	0	0
K05349	Metabolism, Carbohydrate Metabolism, Starch and sucrose metabolism, K05349 - beta-glucosidase [EC:3.2.1.21]	bglX; beta-glucosidase [EC:3.2.1.21]	7	7	9	1	2	3	5	3	4	6	12	10	5	6	7	0	3	5	9	8	10	5	5	5	0	0	0	2	5	3	6	5	2	0	2	0	1	0	0	6	6	1	5	4	3	0	0
K05350	Metabolism, Carbohydrate Metabolism, Starch and sucrose metabolism, K05350 - beta-glucosidase [EC:3.2.1.21]	bglB; beta-glucosidase [EC:3.2.1.21]	0	0	0	0	2	0	0	0	0	0	0	0	0	0	0	0	0	0	1	2	0	4	0	1	0	0	0	0	1	2	0	0	0	1	1	0	1	0	0	0	0	1	1	0	0	0	0
K06044	Metabolism, Carbohydrate Metabolism, Starch and sucrose metabolism, K06044 - (1->4)-alpha-D-glucan 1-alpha-D-glucosylmutase [EC:5.4.99.15]	treY, glgY; (1->4)-alpha-D-glucan 1-alpha-D-glucosylmutase [EC:5.4.99.15]	0	0	0	1	0	0	0	0	0	0	0	0	0	0	0	0	0	0	0	0	0	0	0	0	0	0	0	0	0	0	0	0	0	0	0	0	0	0	0	0	0	0	0	0	0	0	0
K01632	Metabolism, Energy Metabolism, Carbon fixation in photosynthetic organisms, K01632 - fructose-6-phosphate phosphoketolase [EC:4.1.2.22]	E4.1.2.22; fructose-6-phosphate phosphoketolase [EC:4.1.2.22]	0	0	0	2	4	6	3	3	4	0	0	0	0	0	0	0	0	0	4	1	1	4	4	2	0	0	0	4	3	5	0	0	0	1	2	2	0	0	2	1	0	5	4	5	4	0	3
K01491	Metabolism, Energy Metabolism, Carbon fixation pathways in prokaryotes, K01491 - methylenetetrahydrofolate dehydrogenase (NADP+) / methenyltetrahydrofolate cyclohydrolase [EC:1.5.1.5 3.5.4.9]	folD; methylenetetrahydrofolate dehydrogenase (NADP+) / methenyltetrahydrofolate cyclohydrolase [EC:1.5.1.5 3.5.4.9]	0	0	0	0	0	0	0	0	0	0	0	0	0	0	0	0	0	0	0	0	0	0	0	1	0	0	0	0	0	0	0	0	0	0	0	0	0	0	0	0	0	0	1	0	0	0	0
K01938	Metabolism, Energy Metabolism, Carbon fixation pathways in prokaryotes, K01938 - formate--tetrahydrofolate ligase [EC:6.3.4.3]	fhs; formate--tetrahydrofolate ligase [EC:6.3.4.3]	0	4	4	0	4	14	1	1	3	16	16	16	7	1	7	5	17	7	28	10	17	10	15	18	7	1	15	3	8	14	6	10	10	7	6	8	2	7	11	1	2	2	26	18	16	13	2
K03737	Metabolism, Energy Metabolism, Carbon fixation pathways in prokaryotes, K03737 - putative pyruvate-flavodoxin oxidoreductase [EC:1.2.7.-]	nifJ; putative pyruvate-flavodoxin oxidoreductase [EC:1.2.7.-]	4	19	10	4	16	15	1	8	10	20	17	16	13	8	13	4	26	11	39	25	35	16	7	19	13	4	20	28	65	84	52	4	12	4	15	11	23	11	16	16	9	25	59	78	42	29	18
K00058	Metabolism, Energy Metabolism, Methane metabolism, K00058 - D-3-phosphoglycerate dehydrogenase [EC:1.1.1.95]	serA, PHGDH; D-3-phosphoglycerate dehydrogenase [EC:1.1.1.95]	0	0	0	0	0	0	0	0	0	0	0	0	0	0	0	0	1	0	1	0	0	0	1	1	0	0	0	0	0	0	0	1	0	0	0	0	0	2	0	0	0	0	3	0	0	0	2
K00194	Metabolism, Energy Metabolism, Methane metabolism, K00194 - acetyl-CoA decarbonylase/synthase complex subunit delta [EC:2.1.1.245]	cdhD, acsD; acetyl-CoA decarbonylase/synthase complex subunit delta [EC:2.1.1.245]	0	0	0	0	0	0	0	0	0	0	0	0	1	0	0	0	0	1	1	0	0	0	0	0	2	0	0	0	0	0	0	0	0	1	0	0	0	0	0	0	0	0	1	0	0	0	0
K00197	Metabolism, Energy Metabolism, Methane metabolism, K00197 - acetyl-CoA decarbonylase/synthase complex subunit gamma [EC:2.1.1.245]	cdhE, acsC; acetyl-CoA decarbonylase/synthase complex subunit gamma [EC:2.1.1.245]	0	0	0	0	0	0	0	0	0	0	0	0	0	0	0	0	0	0	0	0	0	0	0	0	0	0	0	0	0	0	0	0	0	0	0	0	0	0	0	0	0	0	3	0	0	0	1
K00198	Metabolism, Energy Metabolism, Methane metabolism, K00198 - carbon-monoxide dehydrogenase catalytic subunit [EC:1.2.99.2]	cooS, acsA; carbon-monoxide dehydrogenase catalytic subunit [EC:1.2.99.2 1.2.7.4]	20	23	23	9	25	26	16	17	19	24	28	24	28	13	32	12	27	26	29	30	25	19	33	18	13	12	22	10	17	15	14	17	12	12	21	21	15	15	20	10	24	17	14	26	23	16	18
K00532	Metabolism, Energy Metabolism, Methane metabolism, K00532 - ferredoxin hydrogenase [EC:1.12.7.2]	NA	0	0	0	0	0	0	0	0	0	0	0	0	0	0	0	0	0	0	1	0	0	0	0	0	0	0	0	0	0	0	0	1	2	0	0	0	0	1	0	0	0	0	0	0	0	0	0
K00831	Metabolism, Energy Metabolism, Methane metabolism, K00831 - phosphoserine aminotransferase [EC:2.6.1.52]	serC, PSAT1; phosphoserine aminotransferase [EC:2.6.1.52]	62	46	72	20	61	64	42	55	67	51	58	49	39	27	39	28	51	43	53	58	58	50	61	36	42	32	43	43	42	39	48	42	46	22	41	59	35	37	44	24	39	37	34	55	42	36	37
K03388	Metabolism, Energy Metabolism, Methane metabolism, K03388 - heterodisulfide reductase subunit A [EC:1.8.98.1]	hdrA; heterodisulfide reductase subunit A [EC:1.8.98.1]	0	2	1	0	0	0	0	0	0	1	0	0	0	0	2	0	0	0	0	1	2	0	0	0	0	0	0	0	0	0	0	0	0	0	0	0	0	0	0	0	0	0	0	0	0	0	0
K04480	Metabolism, Energy Metabolism, Methane metabolism, K04480 - methanol---5-hydroxybenzimidazolylcobamide Co-methyltransferase [EC:2.1.1.90]	mtaB; methanol---5-hydroxybenzimidazolylcobamide Co-methyltransferase [EC:2.1.1.90]	0	0	0	0	0	0	0	0	0	0	0	1	0	0	0	0	0	0	0	0	0	0	0	0	0	0	0	0	0	0	0	0	0	0	0	0	0	0	0	0	0	0	0	0	0	0	0
K00260	Metabolism, Energy Metabolism, Nitrogen metabolism, K00260 - glutamate dehydrogenase [EC:1.4.1.2]	gudB, rocG; glutamate dehydrogenase [EC:1.4.1.2]	2	0	0	3	7	12	2	9	4	16	16	17	0	1	1	7	0	0	15	8	9	8	5	13	4	1	7	0	0	14	0	1	0	2	12	14	2	8	2	12	4	4	5	6	0	0	2
K00262	Metabolism, Energy Metabolism, Nitrogen metabolism, K00262 - glutamate dehydrogenase (NADP+) [EC:1.4.1.4]	E1.4.1.4, gdhA; glutamate dehydrogenase (NADP+) [EC:1.4.1.4]	174	173	181	129	158	235	81	117	138	142	173	158	129	80	133	61	84	129	202	151	156	185	222	191	125	40	140	108	163	156	94	99	105	63	119	166	93	92	111	70	146	87	198	203	170	157	148
K00265	Metabolism, Energy Metabolism, Nitrogen metabolism, K00265 - glutamate synthase (NADPH/NADH) large chain [EC:1.4.1.13 1.4.1.14]	gltB; glutamate synthase (NADPH/NADH) large chain [EC:1.4.1.13 1.4.1.14]	0	0	0	0	1	2	0	0	0	0	0	0	0	0	0	0	0	0	0	0	0	0	0	0	0	0	0	0	0	0	0	0	0	0	0	0	0	0	0	0	0	0	0	0	0	0	0
K00266	Metabolism, Energy Metabolism, Nitrogen metabolism, K00266 - glutamate synthase (NADPH/NADH) small chain [EC:1.4.1.13 1.4.1.14]	gltD; glutamate synthase (NADPH/NADH) small chain [EC:1.4.1.13 1.4.1.14]	0	2	1	0	0	2	0	1	1	5	3	3	6	0	4	0	2	0	3	5	1	3	2	3	2	0	4	3	7	9	1	0	2	1	3	2	0	0	0	1	0	4	5	10	5	4	3
K00605	Metabolism, Energy Metabolism, Nitrogen metabolism, K00605 - aminomethyltransferase [EC:2.1.2.10]	gcvT, AMT; aminomethyltransferase [EC:2.1.2.10]	0	0	0	0	0	0	0	0	0	0	0	0	0	0	0	0	0	0	0	0	0	0	0	0	0	0	0	0	0	0	0	1	0	0	0	0	0	0	0	0	0	0	0	0	0	0	0
K00926	Metabolism, Energy Metabolism, Nitrogen metabolism, K00926 - carbamate kinase [EC:2.7.2.2]	arcC; carbamate kinase [EC:2.7.2.2]	0	0	0	0	0	0	0	0	0	0	0	0	0	0	0	0	0	0	0	0	1	0	0	0	0	0	0	0	0	0	0	0	0	0	0	0	0	0	0	0	0	0	0	0	0	0	0
K01424	Metabolism, Energy Metabolism, Nitrogen metabolism, K01424 - L-asparaginase [EC:3.5.1.1]	E3.5.1.1, ansA, ansB; L-asparaginase [EC:3.5.1.1]	0	0	0	0	0	0	0	0	0	0	0	0	0	0	0	1	1	1	0	0	0	0	0	0	0	0	0	0	0	0	0	0	0	0	0	0	0	0	0	1	1	1	0	0	0	0	0
K01425	Metabolism, Energy Metabolism, Nitrogen metabolism, K01425 - glutaminase [EC:3.5.1.2]	glsA, GLS; glutaminase [EC:3.5.1.2]	0	0	0	0	0	0	0	0	0	0	0	0	0	0	0	0	0	0	0	0	0	0	0	0	0	0	0	0	0	0	0	0	0	0	0	0	0	0	0	0	1	0	0	0	0	0	0
K01744	Metabolism, Energy Metabolism, Nitrogen metabolism, K01744 - aspartate ammonia-lyase [EC:4.3.1.1]	aspA; aspartate ammonia-lyase [EC:4.3.1.1]	0	0	0	0	0	0	0	0	0	0	0	0	0	0	0	0	0	0	0	0	0	0	0	0	0	0	0	0	0	0	0	0	0	0	0	0	0	0	0	0	1	0	0	0	0	0	1
K01914	Metabolism, Energy Metabolism, Nitrogen metabolism, K01914 - aspartate--ammonia ligase [EC:6.3.1.1]	asnA; aspartate--ammonia ligase [EC:6.3.1.1]	0	0	0	0	0	0	0	0	0	0	0	0	0	0	0	0	0	0	0	0	0	1	0	0	0	0	0	0	0	0	0	1	0	0	0	0	0	0	0	0	0	0	0	0	0	0	0
K01953	Metabolism, Energy Metabolism, Nitrogen metabolism, K01953 - asparagine synthase (glutamine-hydrolysing) [EC:6.3.5.4]	asnB, ASNS; asparagine synthase (glutamine-hydrolysing) [EC:6.3.5.4]	0	0	0	0	0	0	0	0	0	0	0	0	0	0	0	0	0	0	0	0	0	0	0	0	0	0	0	1	1	0	0	0	0	0	0	0	0	0	0	0	0	0	1	0	1	0	0
K02567	Metabolism, Energy Metabolism, Nitrogen metabolism, K02567 - periplasmic nitrate reductase NapA [EC:1.7.99.4]	napA; periplasmic nitrate reductase NapA [EC:1.7.99.4]	0	0	0	0	0	0	0	0	0	0	0	0	0	0	0	0	0	0	0	0	0	0	0	0	0	0	0	0	0	0	1	0	0	0	0	0	0	0	0	0	0	0	0	0	0	0	0
K03385	Metabolism, Energy Metabolism, Nitrogen metabolism, K03385 - cytochrome c-552 [EC:1.7.2.2]	nrfA; nitrite reductase (cytochrome c-552) [EC:1.7.2.2]	0	0	0	0	1	3	0	1	0	0	0	0	1	1	0	0	0	0	0	0	0	1	0	1	0	0	0	0	0	0	0	0	0	0	0	0	0	0	0	0	0	0	0	0	0	0	0
K03522	Metabolism, Energy Metabolism, Nitrogen metabolism, K03522 - electron transfer flavoprotein alpha subunit	NA	0	0	0	0	0	1	0	0	0	0	0	2	0	0	2	0	0	0	0	4	1	0	0	0	0	0	1	1	0	0	0	0	0	0	1	1	0	0	1	0	0	0	4	2	0	0	0
K00331	Metabolism, Energy Metabolism, Oxidative phosphorylation, K00331 - NADH-quinone oxidoreductase subunit B [EC:1.6.5.3]	nuoB; NADH-quinone oxidoreductase subunit B [EC:1.6.5.3]	0	0	0	0	0	0	0	0	0	0	0	0	0	1	1	0	0	0	0	0	0	0	0	0	0	0	0	0	0	0	0	0	0	0	0	0	0	0	0	0	0	0	0	0	0	0	0
K00334	Metabolism, Energy Metabolism, Oxidative phosphorylation, K00334 - NADH-quinone oxidoreductase subunit E [EC:1.6.5.3]	nuoE; NADH-quinone oxidoreductase subunit E [EC:1.6.5.3]	0	0	0	0	0	0	0	0	0	0	0	0	0	0	0	0	0	0	0	0	0	0	0	0	0	0	0	1	0	0	0	0	1	0	0	0	0	0	0	0	0	1	0	0	0	0	0
K00335	Metabolism, Energy Metabolism, Oxidative phosphorylation, K00335 - NADH-quinone oxidoreductase subunit F [EC:1.6.5.3]	nuoF; NADH-quinone oxidoreductase subunit F [EC:1.6.5.3]	0	0	0	0	0	0	0	0	0	0	0	0	0	0	1	0	0	0	0	0	0	0	0	0	0	0	1	0	1	0	0	0	0	0	0	0	0	0	0	0	0	0	0	1	0	0	0
K00336	Metabolism, Energy Metabolism, Oxidative phosphorylation, K00336 - NADH-quinone oxidoreductase subunit G [EC:1.6.5.3]	nuoG; NADH-quinone oxidoreductase subunit G [EC:1.6.5.3]	0	0	0	0	0	0	0	0	0	0	0	0	0	0	0	0	0	0	0	0	0	0	0	0	0	0	0	0	0	0	1	0	1	0	0	0	0	0	0	0	0	0	0	0	0	0	0
K00339	Metabolism, Energy Metabolism, Oxidative phosphorylation, K00339 - NADH-quinone oxidoreductase subunit J [EC:1.6.5.3]	nuoJ; NADH-quinone oxidoreductase subunit J [EC:1.6.5.3]	0	0	0	0	0	0	0	0	0	0	0	0	0	1	2	1	5	1	0	0	0	1	1	0	0	0	0	0	1	0	0	0	0	0	0	0	0	1	1	0	0	0	0	0	0	0	0
K00340	Metabolism, Energy Metabolism, Oxidative phosphorylation, K00340 - NADH-quinone oxidoreductase subunit K [EC:1.6.5.3]	nuoK; NADH-quinone oxidoreductase subunit K [EC:1.6.5.3]	6	3	3	0	0	0	0	0	0	0	0	0	0	1	0	0	0	0	0	0	0	0	1	1	0	0	0	0	2	0	0	0	0	0	0	0	1	4	4	2	2	1	6	0	0	0	0
K00426	Metabolism, Energy Metabolism, Oxidative phosphorylation, K00426 - cytochrome d ubiquinol oxidase subunit II [EC:1.10.3.-]	cydB; cytochrome d ubiquinol oxidase subunit II [EC:1.10.3.-]	0	0	0	0	0	0	0	0	0	0	0	0	0	1	0	0	0	0	0	0	0	0	0	0	0	0	0	0	0	0	0	0	0	0	0	0	0	0	0	0	0	0	0	0	0	0	0
K00937	Metabolism, Energy Metabolism, Oxidative phosphorylation, K00937 - polyphosphate kinase [EC:2.7.4.1]	ppk; polyphosphate kinase [EC:2.7.4.1]	0	0	0	0	0	0	0	0	0	0	0	0	0	0	0	0	1	0	0	0	0	0	0	0	0	0	0	0	0	0	0	0	0	0	0	0	0	0	0	0	0	0	0	0	0	0	0
K01507	Metabolism, Energy Metabolism, Oxidative phosphorylation, K01507 - inorganic pyrophosphatase [EC:3.6.1.1]	ppa; inorganic pyrophosphatase [EC:3.6.1.1]	0	0	0	0	0	0	0	0	0	0	0	0	0	2	0	0	0	0	0	0	0	0	0	0	0	0	0	0	0	0	0	0	1	0	0	0	0	0	0	0	0	0	0	0	0	0	0
K02110	Metabolism, Energy Metabolism, Oxidative phosphorylation, K02110 - F-type H+-transporting ATPase subunit c [EC:3.6.3.14]	ATPF0C, atpE; F-type H+-transporting ATPase subunit c	0	1	1	2	0	0	0	0	2	0	0	1	0	2	0	1	0	0	0	0	0	0	1	0	1	0	2	0	0	0	1	1	3	0	0	0	0	0	1	0	0	0	0	0	0	1	1
K02117	Metabolism, Energy Metabolism, Oxidative phosphorylation, K02117 - V-type H+-transporting ATPase subunit A [EC:3.6.3.14]	ATPVA, ntpA, atpA; V/A-type H+-transporting ATPase subunit A [EC:3.6.3.14]	0	0	0	0	0	0	1	0	1	0	0	0	0	0	0	0	0	0	1	0	1	0	0	0	0	0	0	0	0	0	0	0	0	0	0	1	0	0	0	0	1	1	0	0	0	0	0
K02118	Metabolism, Energy Metabolism, Oxidative phosphorylation, K02118 - V-type H+-transporting ATPase subunit B [EC:3.6.3.14]	ATPVB, ntpB, atpB; V/A-type H+-transporting ATPase subunit B	0	0	0	0	0	0	0	0	0	0	0	0	0	0	0	0	0	0	0	0	0	0	0	0	0	0	0	0	0	0	0	0	0	0	0	0	0	0	0	0	0	0	1	0	0	0	0
K02119	Metabolism, Energy Metabolism, Oxidative phosphorylation, K02119 - V-type H+-transporting ATPase subunit C [EC:3.6.3.14]	ATPVC, ntpC, atpC; V/A-type H+-transporting ATPase subunit C	0	0	0	1	0	0	0	0	0	0	0	0	0	0	0	0	0	0	0	0	0	0	0	0	1	0	0	0	0	0	0	0	0	0	0	0	0	0	0	0	0	0	0	0	0	0	0
K02124	Metabolism, Energy Metabolism, Oxidative phosphorylation, K02124 - V-type H+-transporting ATPase subunit K [EC:3.6.3.14]	ATPVK, ntpK, atpK; V/A-type H+-transporting ATPase subunit K	0	0	0	0	0	0	0	0	0	0	0	0	0	0	0	0	0	0	0	0	0	0	0	0	0	0	0	0	0	0	0	0	0	0	0	0	0	0	1	0	0	0	0	0	0	0	0
K13378	Metabolism, Energy Metabolism, Oxidative phosphorylation, K13378 - NADH-quinone oxidoreductase subunit C/D [EC:1.6.5.3]	nuoCD; NADH-quinone oxidoreductase subunit C/D [EC:1.6.5.3]	0	1	0	0	0	0	0	0	0	0	0	0	1	1	1	2	0	0	0	0	0	0	0	0	0	0	0	1	2	2	0	0	0	5	5	10	0	0	0	0	0	0	0	0	0	1	0
K00394	Metabolism, Energy Metabolism, Sulfur metabolism, K00394 - adenylylsulfate reductase	aprA; adenylylsulfate reductase, subunit A [EC:1.8.99.2]	0	0	0	0	0	0	0	0	0	0	0	0	0	0	0	0	0	0	5	3	4	0	0	0	0	0	0	0	0	0	0	0	0	0	0	0	0	0	0	0	0	0	0	0	0	0	0
K00955	Metabolism, Energy Metabolism, Sulfur metabolism, K00955 - bifunctional enzyme CysN/CysC [EC:2.7.7.4 2.7.1.25]	cysNC; bifunctional enzyme CysN/CysC [EC:2.7.7.4 2.7.1.25]	0	0	0	0	0	0	0	0	0	0	0	0	0	0	0	0	0	0	0	0	0	1	0	0	0	0	0	0	0	0	0	0	0	0	0	0	0	0	0	0	0	0	0	0	0	0	0
K01738	Metabolism, Energy Metabolism, Sulfur metabolism, K01738 - cysteine synthase A [EC:2.5.1.47]	cysK; cysteine synthase A [EC:2.5.1.47]	22	6	34	33	4	19	11	31	24	25	12	18	11	8	20	16	8	14	5	12	8	1	34	42	33	11	2	0	0	1	0	11	10	38	38	40	3	0	14	22	36	19	28	2	0	1	4
K01739	Metabolism, Energy Metabolism, Sulfur metabolism, K01739 - cystathionine gamma-synthase [EC:2.5.1.48]	metB; cystathionine gamma-synthase [EC:2.5.1.48]	0	0	0	0	2	1	0	0	0	0	0	0	0	0	0	0	0	0	0	0	0	0	0	0	0	1	1	0	0	0	0	0	0	1	0	0	1	0	0	0	0	0	0	1	1	0	0
K01760	Metabolism, Energy Metabolism, Sulfur metabolism, K01760 - cystathionine beta-lyase [EC:4.4.1.8]	metC; cystathionine beta-lyase [EC:4.4.1.8]	0	0	0	0	0	0	0	0	0	0	0	0	1	0	0	0	0	0	0	0	0	0	0	0	0	0	0	0	0	0	0	0	0	0	0	0	0	0	0	0	0	0	0	0	0	0	0
K01197	Metabolism, Glycan Biosynthesis and Metabolism, Glycosaminoglycan degradation, K01197 - hyaluronoglucosaminidase [EC:3.2.1.35]	hya; hyaluronoglucosaminidase [EC:3.2.1.35]	0	3	0	2	1	3	0	3	1	4	8	3	4	1	2	3	4	3	1	2	1	0	0	1	0	1	0	3	1	2	0	1	0	1	1	1	1	0	0	0	8	0	0	0	0	0	0
K02535	Metabolism, Glycan Biosynthesis and Metabolism, Lipopolysaccharide biosynthesis, K02535 - UDP-3-O-[3-hydroxymyristoyl] N-acetylglucosamine deacetylase [EC:3.5.1.108]	lpxC; UDP-3-O-[3-hydroxymyristoyl] N-acetylglucosamine deacetylase [EC:3.5.1.108]	0	0	0	0	0	0	0	0	0	0	0	0	0	0	0	0	1	0	0	0	0	0	0	0	0	0	0	0	0	0	0	0	0	0	0	0	0	0	0	0	0	0	0	0	0	0	0
K02536	Metabolism, Glycan Biosynthesis and Metabolism, Lipopolysaccharide biosynthesis, K02536 - UDP-3-O-[3-hydroxymyristoyl] glucosamine N-acyltransferase [EC:2.3.1.191]	lpxD; UDP-3-O-[3-hydroxymyristoyl] glucosamine N-acyltransferase [EC:2.3.1.191]	0	0	0	0	0	0	0	0	0	0	0	0	0	0	0	0	0	0	0	0	0	0	0	0	0	0	0	0	0	0	1	0	0	0	0	0	0	0	0	0	0	0	0	0	0	0	0
K03270	Metabolism, Glycan Biosynthesis and Metabolism, Lipopolysaccharide biosynthesis, K03270 - 3-deoxy-D-manno-octulosonate 8-phosphate phosphatase (KDO 8-P phosphatase) [EC:3.1.3.45]	kdsC; 3-deoxy-D-manno-octulosonate 8-phosphate phosphatase (KDO 8-P phosphatase) [EC:3.1.3.45]	0	0	0	0	0	0	0	0	0	0	0	0	0	0	0	0	0	0	0	0	0	0	1	0	0	0	0	0	0	0	0	0	0	0	0	0	0	0	0	0	0	0	0	0	0	0	0
K01191	Metabolism, Glycan Biosynthesis and Metabolism, Other glycan degradation, K01191 - alpha-mannosidase [EC:3.2.1.24]	E3.2.1.24; alpha-mannosidase [EC:3.2.1.24]	0	1	0	0	0	0	0	0	0	1	0	0	0	0	1	0	0	0	1	0	0	0	0	0	0	0	0	0	0	0	0	0	0	0	0	0	0	0	0	0	0	0	0	0	0	0	0
K01192	Metabolism, Glycan Biosynthesis and Metabolism, Other glycan degradation, K01192 - beta-mannosidase [EC:3.2.1.25]	E3.2.1.25, MANBA, manB; beta-mannosidase [EC:3.2.1.25]	0	0	0	1	0	0	0	0	0	0	0	0	0	0	0	0	0	0	0	0	0	0	0	0	0	0	0	0	0	0	0	0	0	0	0	0	0	0	0	0	0	0	0	0	0	0	0
K01206	Metabolism, Glycan Biosynthesis and Metabolism, Other glycan degradation, K01206 - alpha-L-fucosidase [EC:3.2.1.51]	FUCA; alpha-L-fucosidase [EC:3.2.1.51]	12	8	6	3	9	5	3	6	8	8	13	7	4	5	4	5	9	9	14	9	13	4	8	6	4	3	5	7	3	5	0	2	0	6	12	10	8	12	15	23	17	11	9	4	1	9	12
K05364	Metabolism, Glycan Biosynthesis and Metabolism, Peptidoglycan biosynthesis, K05364 - peptidoglycan glycosyltransferase [EC:2.4.1.129]	E2.4.1.129; peptidoglycan glycosyltransferase [EC:2.4.1.129]	0	0	0	0	0	0	0	0	0	0	0	0	0	0	0	0	0	0	0	0	0	0	0	0	0	0	0	0	0	0	0	0	0	0	0	0	0	0	0	0	0	0	0	0	0	0	1
K05366	Metabolism, Glycan Biosynthesis and Metabolism, Peptidoglycan biosynthesis, K05366 - penicillin-binding protein 1A [EC:2.4.1.- 3.4.-.-]	mrcA; penicillin-binding protein 1A [EC:2.4.1.- 3.4.-.-]	0	0	0	0	1	2	0	0	0	0	1	0	0	0	1	0	0	0	2	0	1	3	8	6	0	0	1	0	0	0	0	0	0	0	0	2	1	1	1	0	0	0	2	1	1	1	4
K07258	Metabolism, Glycan Biosynthesis and Metabolism, Peptidoglycan biosynthesis, K07258 - D-alanyl-D-alanine carboxypeptidase (penicillin-binding protein 5/6) [EC:3.4.16.4]	dacC, dacA, dacD; D-alanyl-D-alanine carboxypeptidase (penicillin-binding protein 5/6) [EC:3.4.16.4]	0	0	0	0	0	0	1	0	0	0	0	0	0	0	0	0	0	0	0	0	0	0	0	0	0	0	0	0	0	0	0	0	0	0	0	0	0	0	0	0	1	0	0	0	0	0	0
K12555	Metabolism, Glycan Biosynthesis and Metabolism, Peptidoglycan biosynthesis, K12555 - penicillin-binding protein 2A [EC:2.4.1.129 2.3.2.-]	pbp2A; penicillin-binding protein 2A [EC:2.4.1.129 2.3.2.-]	0	0	0	0	0	1	0	0	0	0	0	0	0	0	0	0	0	0	0	0	0	0	0	0	0	0	0	0	0	0	0	0	0	0	0	0	0	0	0	0	0	0	0	0	1	0	0
K01076	Metabolism, Lipid Metabolism, Biosynthesis of unsaturated fatty acids, K01076 - [EC:3.1.2.-]	E3.1.2.-; [EC:3.1.2.-]	1	0	0	0	0	0	0	0	0	0	0	0	0	0	0	0	0	0	0	0	0	0	0	0	0	0	0	0	0	0	0	0	0	0	0	0	0	0	0	0	0	0	0	0	0	0	0
K00059	Metabolism, Lipid Metabolism, Fatty acid biosynthesis, K00059 - 3-oxoacyl-[acyl-carrier protein] reductase [EC:1.1.1.100]	fabG; 3-oxoacyl-[acyl-carrier protein] reductase [EC:1.1.1.100]	0	0	0	0	0	0	1	0	0	0	0	0	0	0	0	0	0	0	0	0	0	0	0	0	0	0	0	0	0	0	0	0	0	0	0	0	0	0	0	0	0	0	0	0	0	0	0
K02371	Metabolism, Lipid Metabolism, Fatty acid biosynthesis, K02371 - enoyl-[acyl carrier protein] reductase II [EC:1.3.1.-]	fabK; enoyl-[acyl-carrier protein] reductase II [EC:1.3.1.9]	0	0	0	0	0	0	0	0	0	0	0	0	0	0	0	0	0	0	0	0	0	0	0	0	0	0	0	0	0	0	1	0	0	0	0	0	0	0	0	0	0	0	0	0	0	0	0
K02372	Metabolism, Lipid Metabolism, Fatty acid biosynthesis, K02372 - 3-hydroxyacyl-[acyl-carrier-protein] dehydratase [EC:4.2.1.59]	fabZ; 3-hydroxyacyl-[acyl-carrier-protein] dehydratase [EC:4.2.1.59]	2	0	0	0	0	0	0	0	0	0	0	0	0	0	0	0	0	0	0	0	0	0	0	0	0	0	0	0	0	0	0	0	0	0	0	0	0	0	0	0	0	0	0	0	0	0	0
K09458	Metabolism, Lipid Metabolism, Fatty acid biosynthesis, K09458 - 3-oxoacyl-[acyl-carrier-protein] synthase II [EC:2.3.1.179]	fabF; 3-oxoacyl-[acyl-carrier-protein] synthase II [EC:2.3.1.179]	2	0	0	0	1	0	0	0	0	0	0	0	1	2	0	0	0	0	0	1	1	0	0	0	0	1	0	3	1	0	1	0	0	0	0	0	0	0	0	0	0	0	0	0	0	0	0
K00632	Metabolism, Lipid Metabolism, Fatty acid metabolism, K00632 - acetyl-CoA acyltransferase [EC:2.3.1.16]	fadA, fadI; acetyl-CoA acyltransferase [EC:2.3.1.16]	0	1	0	1	1	0	1	1	0	0	0	1	0	0	1	0	1	1	1	1	1	1	0	1	1	0	0	0	0	1	0	0	0	1	1	1	1	1	0	0	0	1	0	0	0	1	1
K00005	Metabolism, Lipid Metabolism, Glycerolipid metabolism, K00005 - glycerol dehydrogenase [EC:1.1.1.6]	gldA; glycerol dehydrogenase [EC:1.1.1.6]	1	1	2	3	2	4	3	2	3	6	2	2	4	1	6	2	1	2	4	2	2	1	2	2	1	1	1	1	2	2	0	1	0	1	2	1	2	1	1	3	1	3	1	2	1	2	1
K00086	Metabolism, Lipid Metabolism, Glycerolipid metabolism, K00086 - 1	dhaT; 1,3-propanediol dehydrogenase [EC:1.1.1.202]	3	2	1	0	0	0	0	1	2	3	2	5	0	1	0	1	1	1	0	2	0	0	0	1	2	0	1	1	0	1	0	0	1	0	0	0	0	0	0	1	1	0	0	0	0	2	0
K00655	Metabolism, Lipid Metabolism, Glycerolipid metabolism, K00655 - 1-acyl-sn-glycerol-3-phosphate acyltransferase [EC:2.3.1.51]	plsC; 1-acyl-sn-glycerol-3-phosphate acyltransferase [EC:2.3.1.51]	0	0	0	0	0	0	0	0	0	0	0	0	0	0	0	0	1	1	0	0	0	0	0	0	1	0	0	0	0	0	0	0	0	0	0	0	0	0	0	0	0	0	0	0	0	0	0
K00864	Metabolism, Lipid Metabolism, Glycerolipid metabolism, K00864 - glycerol kinase [EC:2.7.1.30]	glpK, GK; glycerol kinase [EC:2.7.1.30]	0	0	0	0	0	0	0	0	0	0	0	0	0	0	0	0	0	0	0	0	0	0	1	2	0	0	1	0	6	2	0	0	0	0	0	0	0	0	3	0	0	0	1	2	3	1	2
K01699	Metabolism, Lipid Metabolism, Glycerolipid metabolism, K01699 - propanediol dehydratase large subunit [EC:4.2.1.28]	pduC; propanediol dehydratase large subunit [EC:4.2.1.28]	16	15	18	19	14	25	5	8	13	16	6	16	14	6	18	2	0	4	11	8	18	12	11	5	5	6	2	9	6	9	13	6	7	3	6	6	8	4	10	7	6	11	12	16	17	6	5
K03429	Metabolism, Lipid Metabolism, Glycerolipid metabolism, K03429 - 1	ugtP; 1,2-diacylglycerol 3-glucosyltransferase [EC:2.4.1.157]	0	0	0	0	0	0	0	0	0	0	0	0	0	0	0	0	0	0	0	0	0	0	0	0	0	0	0	0	0	0	0	0	0	0	0	0	0	0	0	0	0	0	0	0	1	0	0
K03621	Metabolism, Lipid Metabolism, Glycerolipid metabolism, K03621 - glycerol-3-phosphate acyltransferase PlsX [EC:2.3.1.15]	plsX; glycerol-3-phosphate acyltransferase PlsX [EC:2.3.1.15]	0	0	0	0	0	0	0	0	0	0	0	0	0	0	0	0	0	0	0	0	0	0	0	0	0	0	0	1	0	0	0	0	0	0	0	0	0	0	0	0	0	0	0	0	0	0	0
K05878	Metabolism, Lipid Metabolism, Glycerolipid metabolism, K05878 - dihydroxyacetone kinase	dhaK; dihydroxyacetone kinase, N-terminal domain [EC:2.7.1.-]	15	9	13	8	11	19	2	13	11	9	11	10	11	3	12	11	13	10	16	12	12	8	15	11	7	4	6	10	9	11	8	6	5	1	3	7	5	3	6	4	6	10	13	20	12	10	8
K05879	Metabolism, Lipid Metabolism, Glycerolipid metabolism, K05879 - dihydroxyacetone kinase	dhaL; dihydroxyacetone kinase, C-terminal domain [EC:2.7.1.-]	0	0	0	0	0	0	0	0	0	0	0	0	0	1	0	0	0	0	0	0	0	0	0	0	0	0	0	0	0	0	0	0	0	0	0	0	0	0	0	0	0	0	0	0	0	0	0
K13922	Metabolism, Lipid Metabolism, Glycerolipid metabolism, K13922 - propionaldehyde dehydrogenase	pduP; propionaldehyde dehydrogenase [EC:1.2.1.87]	14	14	14	12	20	19	9	15	26	19	21	14	13	14	20	17	9	13	18	15	15	14	17	12	11	7	6	10	8	7	20	11	19	1	6	14	7	9	10	13	9	11	3	9	10	11	14
K00111	Metabolism, Lipid Metabolism, Glycerophospholipid metabolism, K00111 - glycerol-3-phosphate dehydrogenase [EC:1.1.5.3]	glpA, glpD; glycerol-3-phosphate dehydrogenase [EC:1.1.5.3]	0	2	0	0	0	1	0	0	0	0	1	1	2	0	0	0	0	0	1	1	0	1	0	1	0	0	1	0	2	3	1	1	0	0	0	1	2	0	1	0	0	0	1	1	2	1	1
K01048	Metabolism, Lipid Metabolism, Glycerophospholipid metabolism, K01048 - lysophospholipase [EC:3.1.1.5]	pldB; lysophospholipase [EC:3.1.1.5]	0	0	0	0	0	0	0	0	0	0	0	0	0	0	0	0	0	1	0	0	0	0	0	0	0	0	0	0	0	0	0	0	0	0	0	0	0	0	0	0	0	0	1	0	0	0	0
K01126	Metabolism, Lipid Metabolism, Glycerophospholipid metabolism, K01126 - glycerophosphoryl diester phosphodiesterase [EC:3.1.4.46]	E3.1.4.46, glpQ, ugpQ; glycerophosphoryl diester phosphodiesterase [EC:3.1.4.46]	0	0	0	0	0	0	0	0	0	0	0	0	2	0	1	0	2	1	0	0	0	0	0	0	0	0	0	0	0	1	0	0	0	0	0	0	0	1	0	0	0	0	0	0	0	0	0
K03735	Metabolism, Lipid Metabolism, Glycerophospholipid metabolism, K03735 - ethanolamine ammonia-lyase large subunit [EC:4.3.1.7]	eutB; ethanolamine ammonia-lyase large subunit [EC:4.3.1.7]	2	0	0	0	1	0	0	1	0	0	0	0	0	0	0	0	0	0	0	1	3	3	2	1	0	0	0	1	1	0	1	1	4	0	0	1	3	0	0	0	0	0	1	1	3	2	0
K06131	Metabolism, Lipid Metabolism, Glycerophospholipid metabolism, K06131 - cardiolipin synthase [EC:2.7.8.-]	cls; cardiolipin synthase [EC:2.7.8.-]	0	0	0	0	0	0	1	0	0	0	0	0	0	0	0	0	0	0	0	0	0	0	0	0	0	0	0	0	0	0	0	0	0	0	0	0	0	0	0	0	0	0	0	0	0	0	0
K01442	Metabolism, Lipid Metabolism, Primary bile acid biosynthesis, K01442 - choloylglycine hydrolase [EC:3.5.1.24]	E3.5.1.24; choloylglycine hydrolase [EC:3.5.1.24]	0	0	0	5	0	0	0	2	3	2	1	2	4	1	3	0	0	1	3	3	3	0	3	4	0	0	0	0	0	0	0	0	4	1	2	4	0	0	0	1	6	2	9	1	0	0	0
K01186	Metabolism, Lipid Metabolism, Sphingolipid metabolism, K01186 - sialidase-1 [EC:3.2.1.18]	NEU1; sialidase-1 [EC:3.2.1.18]	2	0	0	0	0	1	1	2	1	1	1	0	0	1	0	1	4	2	2	7	10	0	0	0	0	0	0	1	0	2	0	0	0	0	2	2	1	1	0	2	5	0	3	1	1	3	0
K01201	Metabolism, Lipid Metabolism, Sphingolipid metabolism, K01201 - glucosylceramidase [EC:3.2.1.45]	GBA, srfJ; glucosylceramidase [EC:3.2.1.45]	0	0	0	1	4	4	0	0	0	0	0	1	0	1	0	0	1	0	2	0	5	0	0	0	0	0	0	4	6	4	0	0	4	0	3	2	1	0	1	2	0	1	2	3	0	0	0
K01130	Metabolism, Lipid Metabolism, Steroid hormone biosynthesis, K01130 - arylsulfatase [EC:3.1.6.1]	E3.1.6.1, aslA; arylsulfatase [EC:3.1.6.1]	0	0	0	0	0	0	0	0	0	0	0	0	0	0	0	0	1	0	1	0	1	0	0	0	0	0	0	0	0	0	0	0	0	0	0	0	1	0	0	0	0	1	0	0	0	0	0
K12344	Metabolism, Lipid Metabolism, Steroid hormone biosynthesis, K12344 - 3-oxo-5-alpha-steroid 4-dehydrogenase 2 [EC:1.3.99.5]	SRD5A2; 3-oxo-5-alpha-steroid 4-dehydrogenase 2 [EC:1.3.1.22]	0	0	0	0	0	0	0	0	0	0	0	0	1	2	0	0	0	0	0	0	0	0	0	0	0	0	0	0	0	0	0	0	0	0	0	0	0	0	0	0	0	0	0	0	0	0	0
K00652	Metabolism, Metabolism of Cofactors and Vitamins, Biotin metabolism, K00652 - 8-amino-7-oxononanoate synthase [EC:2.3.1.47]	bioF; 8-amino-7-oxononanoate synthase [EC:2.3.1.47]	0	0	0	0	0	0	0	0	0	0	0	0	0	0	0	0	0	0	0	0	0	0	0	0	0	0	0	0	3	0	6	0	0	0	0	0	0	0	0	0	0	0	0	1	1	0	0
K00833	Metabolism, Metabolism of Cofactors and Vitamins, Biotin metabolism, K00833 - adenosylmethionine-8-amino-7-oxononanoate aminotransferase [EC:2.6.1.62]	bioA; adenosylmethionine-8-amino-7-oxononanoate aminotransferase [EC:2.6.1.62]	0	1	0	1	1	0	0	0	0	1	1	1	0	0	0	5	2	4	2	1	2	0	0	0	1	0	0	0	0	0	0	0	0	1	1	0	1	0	0	0	0	0	0	0	0	0	0
K03524	Metabolism, Metabolism of Cofactors and Vitamins, Biotin metabolism, K03524 - BirA family transcriptional regulator	birA; BirA family transcriptional regulator, biotin operon repressor / biotin-[acetyl-CoA-carboxylase] ligase [EC:6.3.4.15]	0	0	0	0	0	0	0	0	0	0	0	0	0	0	0	0	0	0	0	0	0	0	0	0	1	0	0	0	0	0	0	0	0	0	0	0	0	0	0	0	0	0	0	0	0	0	0
K00287	Metabolism, Metabolism of Cofactors and Vitamins, Folate biosynthesis, K00287 - dihydrofolate reductase [EC:1.5.1.3]	folA; dihydrofolate reductase [EC:1.5.1.3]	0	0	0	0	0	0	0	0	0	0	0	0	0	0	0	0	0	0	0	0	0	0	0	0	0	0	0	0	1	0	0	0	0	0	0	0	0	0	0	0	0	0	0	0	0	0	0
K00796	Metabolism, Metabolism of Cofactors and Vitamins, Folate biosynthesis, K00796 - dihydropteroate synthase [EC:2.5.1.15]	folP; dihydropteroate synthase [EC:2.5.1.15]	0	0	0	0	0	0	0	0	0	0	0	0	0	0	0	0	0	0	0	0	0	0	1	0	0	0	0	0	0	0	0	0	0	0	0	0	0	0	0	0	0	0	0	0	0	0	0
K01077	Metabolism, Metabolism of Cofactors and Vitamins, Folate biosynthesis, K01077 - alkaline phosphatase [EC:3.1.3.1]	E3.1.3.1, phoA, phoB; alkaline phosphatase [EC:3.1.3.1]	0	0	0	0	0	0	0	0	0	0	0	0	0	0	0	0	0	0	1	0	2	0	0	0	1	0	0	0	0	0	0	0	0	0	0	1	0	0	0	1	0	2	0	0	0	0	0
K11754	Metabolism, Metabolism of Cofactors and Vitamins, Folate biosynthesis, K11754 - dihydrofolate synthase / folylpolyglutamate synthase [EC:6.3.2.12 6.3.2.17]	folC; dihydrofolate synthase / folylpolyglutamate synthase [EC:6.3.2.12 6.3.2.17]	0	0	0	0	0	0	0	0	0	0	0	0	0	0	0	0	0	0	0	0	0	0	0	0	0	0	0	0	0	0	0	0	0	0	0	0	0	0	0	0	0	0	1	1	0	0	1
K03800	Metabolism, Metabolism of Cofactors and Vitamins, Lipoic acid metabolism, K03800 - lipoate-protein ligase A [EC:2.7.7.63]	lplA; lipoate-protein ligase A [EC:2.7.7.63]	1	0	0	0	0	0	0	0	0	0	0	0	0	0	0	0	0	0	0	0	0	0	0	0	0	0	0	0	1	0	0	0	0	0	0	0	0	2	0	0	0	0	0	0	0	0	0
K00767	Metabolism, Metabolism of Cofactors and Vitamins, Nicotinate and nicotinamide metabolism, K00767 - nicotinate-nucleotide pyrophosphorylase (carboxylating) [EC:2.4.2.19]	nadC, QPRT; nicotinate-nucleotide pyrophosphorylase (carboxylating) [EC:2.4.2.19]	0	0	0	0	0	0	0	0	2	0	0	0	0	0	0	0	0	0	0	1	0	0	0	0	0	0	0	0	0	0	0	0	0	1	0	1	0	0	0	0	0	0	1	0	0	0	0
K00858	Metabolism, Metabolism of Cofactors and Vitamins, Nicotinate and nicotinamide metabolism, K00858 - NAD+ kinase [EC:2.7.1.23]	ppnK, NADK; NAD+ kinase [EC:2.7.1.23]	0	0	0	0	0	1	0	0	0	0	0	0	0	0	0	0	0	0	0	1	0	0	0	0	0	0	0	0	0	0	0	0	0	0	0	0	0	0	0	0	0	0	0	0	0	0	0
K01950	Metabolism, Metabolism of Cofactors and Vitamins, Nicotinate and nicotinamide metabolism, K01950 - NAD+ synthase (glutamine-hydrolysing) [EC:6.3.5.1]	E6.3.5.1, NADSYN1, QNS1, nadE; NAD+ synthase (glutamine-hydrolysing) [EC:6.3.5.1]	0	0	0	0	0	0	0	0	0	0	1	0	0	0	0	0	0	0	0	0	0	0	0	0	0	0	0	0	0	0	0	0	0	0	0	0	0	0	0	0	0	0	0	0	0	0	0
K03426	Metabolism, Metabolism of Cofactors and Vitamins, Nicotinate and nicotinamide metabolism, K03426 - NAD+ diphosphatase [EC:3.6.1.22]	E3.6.1.22, NUDT12, nudC; NAD+ diphosphatase [EC:3.6.1.22]	0	0	0	0	0	0	0	0	0	0	0	0	0	0	0	0	1	0	0	0	0	0	0	0	0	1	0	0	0	0	0	0	0	0	0	0	0	0	0	0	0	0	0	0	0	0	0
K03517	Metabolism, Metabolism of Cofactors and Vitamins, Nicotinate and nicotinamide metabolism, K03517 - quinolinate synthase [EC:2.5.1.72]	nadA; quinolinate synthase [EC:2.5.1.72]	0	0	0	0	0	0	0	0	0	0	0	0	0	0	0	0	0	0	0	0	0	0	0	0	0	0	0	0	0	0	0	0	0	0	0	0	0	0	0	0	0	0	0	0	0	0	0
K00604	Metabolism, Metabolism of Cofactors and Vitamins, One carbon pool by folate, K00604 - methionyl-tRNA formyltransferase [EC:2.1.2.9]	MTFMT, fmt; methionyl-tRNA formyltransferase [EC:2.1.2.9]	1	1	1	0	0	1	0	0	0	1	0	0	1	0	1	0	2	1	1	0	0	0	0	0	0	1	0	1	1	0	0	0	0	1	0	1	0	0	1	0	0	0	0	1	1	2	0
K00077	Metabolism, Metabolism of Cofactors and Vitamins, Pantothenate and CoA biosynthesis, K00077 - 2-dehydropantoate 2-reductase [EC:1.1.1.169]	panE, apbA; 2-dehydropantoate 2-reductase [EC:1.1.1.169]	0	0	0	0	0	0	0	0	0	0	0	0	0	0	0	0	0	0	0	0	0	0	0	0	0	0	0	0	0	0	0	0	0	0	0	0	0	0	0	0	0	0	0	0	1	0	0
K01922	Metabolism, Metabolism of Cofactors and Vitamins, Pantothenate and CoA biosynthesis, K01922 - phosphopantothenate-cysteine ligase [EC:6.3.2.5]	PPCS, coaB; phosphopantothenate-cysteine ligase [EC:6.3.2.5]	0	0	0	0	0	0	0	0	0	0	0	0	0	0	0	0	0	0	0	0	0	0	0	1	0	0	0	0	0	0	0	0	0	0	0	0	0	0	0	0	0	0	0	0	0	0	0
K06133	Metabolism, Metabolism of Cofactors and Vitamins, Pantothenate and CoA biosynthesis, K06133 - 4'-phosphopantetheinyl transferase [EC:2.7.8.-]	LYS5, acpT; 4'-phosphopantetheinyl transferase [EC:2.7.8.-]	0	0	0	0	0	0	0	0	0	0	0	0	0	0	0	0	0	0	0	0	0	0	0	0	0	0	0	0	0	0	0	0	0	0	0	0	0	0	0	0	1	0	0	0	0	0	0
K13038	Metabolism, Metabolism of Cofactors and Vitamins, Pantothenate and CoA biosynthesis, K13038 - phosphopantothenoylcysteine decarboxylase / phosphopantothenate--cysteine ligase [EC:4.1.1.36 6.3.2.5]	coaBC, dfp; phosphopantothenoylcysteine decarboxylase / phosphopantothenate--cysteine ligase [EC:4.1.1.36 6.3.2.5]	0	0	0	0	0	0	0	0	0	0	0	0	0	0	0	0	0	0	0	0	0	0	0	0	1	0	1	0	0	0	0	0	0	0	0	0	0	0	0	0	0	0	0	0	1	0	0
K01599	Metabolism, Metabolism of Cofactors and Vitamins, Porphyrin and chlorophyll metabolism, K01599 - uroporphyrinogen decarboxylase [EC:4.1.1.37]	hemE, UROD; uroporphyrinogen decarboxylase [EC:4.1.1.37]	1	0	0	1	0	0	0	0	0	0	0	1	0	1	0	0	0	2	0	0	0	0	0	0	0	0	0	0	0	0	0	0	0	0	0	0	0	0	0	0	0	0	0	0	0	0	0
K01698	Metabolism, Metabolism of Cofactors and Vitamins, Porphyrin and chlorophyll metabolism, K01698 - porphobilinogen synthase [EC:4.2.1.24]	hemB, ALAD; porphobilinogen synthase [EC:4.2.1.24]	1	2	3	1	1	1	1	3	3	1	1	1	2	0	4	1	1	5	5	2	3	1	3	4	4	1	0	2	2	1	0	2	2	1	2	1	1	0	1	2	5	3	3	2	0	1	2
K01845	Metabolism, Metabolism of Cofactors and Vitamins, Porphyrin and chlorophyll metabolism, K01845 - glutamate-1-semialdehyde 2	hemL; glutamate-1-semialdehyde 2,1-aminomutase [EC:5.4.3.8]	2	0	0	0	0	0	1	1	7	0	1	3	0	1	3	3	0	1	2	3	3	0	0	0	1	1	0	0	0	0	0	0	0	0	0	1	0	0	1	0	0	0	0	1	0	0	0
K02190	Metabolism, Metabolism of Cofactors and Vitamins, Porphyrin and chlorophyll metabolism, K02190 - sirohydrochlorin cobaltochelatase [EC:4.99.1.3]	cbiK; sirohydrochlorin cobaltochelatase [EC:4.99.1.3]	9	8	7	11	6	4	5	4	9	8	12	10	13	8	10	9	11	17	21	12	18	3	2	7	5	3	8	5	8	8	2	1	2	5	4	12	6	1	3	12	16	9	12	11	8	16	16
K02217	Metabolism, Metabolism of Cofactors and Vitamins, Porphyrin and chlorophyll metabolism, K02217 - ferritin [EC:1.16.3.1]	NA	0	0	0	0	0	1	0	0	0	0	0	0	0	0	0	0	0	0	1	0	0	0	1	0	0	0	0	0	0	0	0	0	0	0	0	0	0	0	0	0	0	0	1	1	0	0	0
K02224	Metabolism, Metabolism of Cofactors and Vitamins, Porphyrin and chlorophyll metabolism, K02224 - cobyrinic acid a	cobB-cbiA; cobyrinic acid a,c-diamide synthase [EC:6.3.5.9 6.3.5.11]	0	0	0	1	0	0	0	0	0	0	0	0	0	0	0	0	0	0	0	0	0	0	0	0	0	0	1	0	0	0	0	0	0	0	0	0	0	0	0	0	1	0	0	0	0	0	0
K02230	Metabolism, Metabolism of Cofactors and Vitamins, Porphyrin and chlorophyll metabolism, K02230 - cobaltochelatase CobN [EC:6.6.1.2]	cobN; cobaltochelatase CobN [EC:6.6.1.2]	0	0	0	0	0	0	0	0	0	0	0	0	0	0	0	0	0	0	0	0	0	0	0	0	0	0	0	0	1	0	0	0	0	0	0	0	0	0	0	0	0	0	0	0	0	0	0
K02232	Metabolism, Metabolism of Cofactors and Vitamins, Porphyrin and chlorophyll metabolism, K02232 - adenosylcobyric acid synthase [EC:6.3.5.10]	E6.3.5.10, cobQ, cbiP; adenosylcobyric acid synthase [EC:6.3.5.10]	0	0	0	0	0	0	0	0	0	0	0	0	0	0	0	0	0	0	0	0	0	0	0	0	0	0	0	0	0	0	0	0	0	0	0	0	0	0	0	0	0	0	0	0	1	0	0
K02858	Metabolism, Metabolism of Cofactors and Vitamins, Riboflavin metabolism, K02858 - 3	ribB, RIB3; 3,4-dihydroxy 2-butanone 4-phosphate synthase [EC:4.1.99.12]	1	1	2	0	0	0	0	6	0	0	4	3	2	7	13	0	0	0	10	2	3	1	1	2	7	1	10	1	0	0	1	1	1	1	0	1	7	6	9	2	10	8	0	0	0	4	1
K11752	Metabolism, Metabolism of Cofactors and Vitamins, Riboflavin metabolism, K11752 - diaminohydroxyphosphoribosylaminopyrimidine deaminase / 5-amino-6-(5-phosphoribosylamino)uracil reductase [EC:3.5.4.26 1.1.1.193]	ribD; diaminohydroxyphosphoribosylaminopyrimidine deaminase / 5-amino-6-(5-phosphoribosylamino)uracil reductase [EC:3.5.4.26 1.1.1.193]	0	0	0	0	0	0	0	0	0	0	0	0	0	0	0	0	0	0	0	0	0	0	0	1	0	0	0	0	0	1	0	0	0	1	0	0	0	0	0	0	0	0	0	0	0	0	1
K11753	Metabolism, Metabolism of Cofactors and Vitamins, Riboflavin metabolism, K11753 - riboflavin kinase / FMN adenylyltransferase [EC:2.7.1.26 2.7.7.2]	ribF; riboflavin kinase / FMN adenylyltransferase [EC:2.7.1.26 2.7.7.2]	0	0	0	0	0	0	3	2	2	0	0	0	0	0	0	0	2	2	0	0	0	0	0	0	0	0	1	1	1	2	0	0	0	0	0	0	4	2	2	0	0	0	1	1	0	1	1
K00878	Metabolism, Metabolism of Cofactors and Vitamins, Thiamine metabolism, K00878 - hydroxyethylthiazole kinase [EC:2.7.1.50]	thiM; hydroxyethylthiazole kinase [EC:2.7.1.50]	0	0	0	0	0	0	0	0	0	0	1	0	0	0	1	0	0	0	0	0	0	0	1	0	0	0	0	0	0	0	0	0	0	0	0	0	0	0	0	0	0	0	0	0	0	0	0
K00949	Metabolism, Metabolism of Cofactors and Vitamins, Thiamine metabolism, K00949 - thiamine pyrophosphokinase [EC:2.7.6.2]	thiN, TPK1, THI80; thiamine pyrophosphokinase [EC:2.7.6.2]	0	0	0	0	0	0	0	0	0	0	0	0	0	0	0	0	0	0	0	0	0	0	0	0	0	0	0	0	1	0	0	0	0	0	0	0	0	0	0	0	0	0	0	0	0	0	0
K03147	Metabolism, Metabolism of Cofactors and Vitamins, Thiamine metabolism, K03147 - thiamine biosynthesis protein ThiC	thiC; phosphomethylpyrimidine synthase [EC:4.1.99.17]	1	0	0	0	0	0	0	0	0	0	2	0	0	0	0	0	0	0	0	0	1	0	0	0	0	0	0	1	1	1	1	0	0	0	0	0	0	0	0	0	1	0	0	0	0	0	0
K03150	Metabolism, Metabolism of Cofactors and Vitamins, Thiamine metabolism, K03150 - thiamine biosynthesis ThiH	thiH; 2-iminoacetate synthase [EC:4.1.99.19]	0	0	0	0	0	0	0	0	0	0	0	0	0	0	0	0	0	0	0	0	1	0	0	0	0	0	0	0	0	0	0	0	0	0	0	0	0	0	0	0	0	0	0	0	0	0	0
K04487	Metabolism, Metabolism of Cofactors and Vitamins, Thiamine metabolism, K04487 - cysteine desulfurase [EC:2.8.1.7]	iscS, NFS1; cysteine desulfurase [EC:2.8.1.7]	7	12	13	2	8	8	8	7	10	12	18	9	5	4	15	5	2	9	16	11	9	5	12	12	12	3	6	2	4	8	2	1	2	6	5	5	6	1	3	3	8	7	7	7	8	7	7
K07251	Metabolism, Metabolism of Cofactors and Vitamins, Thiamine metabolism, K07251 - thiamine kinase [EC:2.7.1.89]	thiK; thiamine kinase [EC:2.7.1.89]	0	0	0	0	0	1	0	0	0	0	0	0	0	0	0	0	0	0	0	0	0	0	0	0	0	0	0	0	0	0	0	0	0	0	0	0	0	0	0	0	0	0	0	0	0	0	0
K00568	Metabolism, Metabolism of Cofactors and Vitamins, Ubiquinone and other terpenoid-quinone biosynthesis, K00568 - 2-polyprenyl-6-hydroxyphenyl methylase / 3-demethylubiquinone-9 3-methyltransferase [EC:2.1.1.222 2.1.1.64]	ubiG; 2-polyprenyl-6-hydroxyphenyl methylase / 3-demethylubiquinone-9 3-methyltransferase [EC:2.1.1.222 2.1.1.64]	0	0	0	0	0	0	0	0	0	0	0	0	0	0	0	0	0	0	0	0	0	0	0	1	0	0	0	0	0	0	0	0	0	0	0	0	0	0	0	0	0	0	0	0	0	0	0
K02551	Metabolism, Metabolism of Cofactors and Vitamins, Ubiquinone and other terpenoid-quinone biosynthesis, K02551 - 2-succinyl-5-enolpyruvyl-6-hydroxy-3-cyclohexene-1-carboxylate synthase [EC:2.2.1.9]	menD; 2-succinyl-5-enolpyruvyl-6-hydroxy-3-cyclohexene-1-carboxylate synthase [EC:2.2.1.9]	2	1	3	5	3	6	2	4	5	7	3	6	3	3	4	1	2	2	4	4	3	0	5	6	8	6	2	1	3	2	2	7	8	4	3	3	3	3	2	2	9	11	14	3	2	1	1
K03182	Metabolism, Metabolism of Cofactors and Vitamins, Ubiquinone and other terpenoid-quinone biosynthesis, K03182 - 3-octaprenyl-4-hydroxybenzoate carboxy-lyase UbiD [EC:4.1.1.-]	ubiD; 4-hydroxy-3-polyprenylbenzoate decarboxylase [EC:4.1.1.98]	0	0	0	0	0	0	0	0	0	2	0	0	0	0	0	0	0	0	0	0	0	1	0	0	0	0	0	0	0	0	0	0	0	0	0	0	0	0	0	0	0	0	0	0	0	0	0
K00097	Metabolism, Metabolism of Cofactors and Vitamins, Vitamin B6 metabolism, K00097 - 4-hydroxythreonine-4-phosphate dehydrogenase [EC:1.1.1.262]	pdxA; 4-hydroxythreonine-4-phosphate dehydrogenase [EC:1.1.1.262]	0	0	0	0	0	0	0	1	0	0	0	0	0	0	0	0	0	0	0	0	0	0	0	0	0	0	0	0	0	0	0	0	0	0	0	0	0	0	0	0	0	0	0	0	0	0	0
K01579	Metabolism, Metabolism of Other Amino Acids, beta-Alanine metabolism, K01579 - aspartate 1-decarboxylase [EC:4.1.1.11]	panD; aspartate 1-decarboxylase [EC:4.1.1.11]	0	0	0	0	0	0	0	0	0	0	0	0	0	0	0	0	0	0	0	1	1	0	0	0	0	0	0	0	0	0	0	0	0	0	0	0	0	0	0	0	0	0	1	1	0	0	0
K01775	Metabolism, Metabolism of Other Amino Acids, D-Alanine metabolism, K01775 - alanine racemase [EC:5.1.1.1]	alr; alanine racemase [EC:5.1.1.1]	0	0	0	0	0	0	0	0	0	4	4	5	0	0	0	0	0	0	2	2	2	0	0	0	2	0	1	0	1	2	4	0	1	1	1	1	0	2	0	1	2	0	0	0	0	0	0
K03367	Metabolism, Metabolism of Other Amino Acids, D-Alanine metabolism, K03367 - D-alanine--poly(phosphoribitol) ligase subunit 1 [EC:6.1.1.13]	dltA; D-alanine--poly(phosphoribitol) ligase subunit 1 [EC:6.1.1.13]	0	0	0	0	0	0	0	0	0	0	0	0	0	0	0	0	0	0	0	0	0	0	0	1	0	0	0	0	0	0	0	0	0	0	0	0	0	0	0	0	0	0	0	0	0	0	0
K01776	Metabolism, Metabolism of Other Amino Acids, D-Glutamine and D-glutamate metabolism, K01776 - glutamate racemase [EC:5.1.1.3]	murI; glutamate racemase [EC:5.1.1.3]	0	0	0	0	0	0	0	0	0	0	0	0	0	0	0	0	0	0	0	0	0	0	0	0	0	1	0	0	0	0	0	0	0	0	1	0	0	0	0	0	0	0	0	0	0	0	0
K01925	Metabolism, Metabolism of Other Amino Acids, D-Glutamine and D-glutamate metabolism, K01925 - UDP-N-acetylmuramoylalanine--D-glutamate ligase [EC:6.3.2.9]	murD; UDP-N-acetylmuramoylalanine--D-glutamate ligase [EC:6.3.2.9]	0	0	0	0	0	0	0	0	0	0	0	0	0	0	0	0	0	0	1	1	1	0	0	0	0	0	0	0	2	1	0	0	0	0	0	0	0	0	0	0	0	0	0	1	0	0	1
K00383	Metabolism, Metabolism of Other Amino Acids, Glutathione metabolism, K00383 - glutathione reductase (NADPH) [EC:1.8.1.7]	GSR, gor; glutathione reductase (NADPH) [EC:1.8.1.7]	0	0	0	0	0	0	0	0	0	0	0	0	0	0	0	0	0	0	0	0	0	0	0	0	0	0	0	0	0	0	0	0	0	1	0	1	0	0	0	0	0	0	0	0	0	0	0
K01255	Metabolism, Metabolism of Other Amino Acids, Glutathione metabolism, K01255 - leucyl aminopeptidase [EC:3.4.11.1]	CARP, pepA; leucyl aminopeptidase [EC:3.4.11.1]	0	0	0	0	0	1	0	0	0	0	1	1	0	0	1	0	0	0	0	0	2	1	1	1	0	0	0	1	0	0	1	0	1	0	0	0	0	0	0	0	1	1	0	0	1	0	0
K01256	Metabolism, Metabolism of Other Amino Acids, Glutathione metabolism, K01256 - aminopeptidase N [EC:3.4.11.2]	pepN; aminopeptidase N [EC:3.4.11.2]	0	0	0	0	0	0	0	0	0	0	0	0	0	0	0	0	0	0	0	0	0	0	0	0	0	0	0	0	0	0	0	0	1	0	0	0	0	0	0	0	0	0	1	0	0	0	0
K01270	Metabolism, Metabolism of Other Amino Acids, Glutathione metabolism, K01270 - dipeptidase D [EC:3.4.13.-]	pepD; dipeptidase D [EC:3.4.13.-]	12	15	16	6	19	13	5	19	13	19	21	16	13	8	17	4	15	15	18	23	32	18	11	11	12	7	9	17	33	20	16	3	3	3	8	12	16	4	7	17	23	37	15	18	19	11	7
K01919	Metabolism, Metabolism of Other Amino Acids, Glutathione metabolism, K01919 - glutamate--cysteine ligase [EC:6.3.2.2]	gshA; glutamate--cysteine ligase [EC:6.3.2.2]	0	0	0	0	0	0	0	0	0	0	1	0	0	0	1	0	0	0	0	0	0	0	0	0	0	0	0	0	0	0	0	0	1	0	0	0	0	0	0	0	1	0	0	0	0	0	0
K01042	Metabolism, Metabolism of Other Amino Acids, Selenocompound metabolism, K01042 - L-seryl-tRNA(Ser) seleniumtransferase [EC:2.9.1.1]	selA; L-seryl-tRNA(Ser) seleniumtransferase [EC:2.9.1.1]	1	0	1	0	0	0	0	0	0	0	0	0	0	0	0	0	0	0	0	0	0	0	0	0	0	0	0	0	0	0	0	0	0	0	0	0	0	0	0	0	0	0	0	0	0	0	0
K01874	Metabolism, Metabolism of Other Amino Acids, Selenocompound metabolism, K01874 - methionyl-tRNA synthetase [EC:6.1.1.10]	MARS, metG; methionyl-tRNA synthetase [EC:6.1.1.10]	0	0	0	0	0	0	0	0	0	0	0	0	0	0	0	0	0	0	0	0	0	0	1	0	0	0	0	0	0	1	0	0	0	0	0	0	0	0	0	0	0	0	0	2	0	0	0
K11717	Metabolism, Metabolism of Other Amino Acids, Selenocompound metabolism, K11717 - cysteine desulfurase / selenocysteine lyase [EC:2.8.1.7 4.4.1.16]	sufS; cysteine desulfurase / selenocysteine lyase [EC:2.8.1.7 4.4.1.16]	0	0	0	0	0	0	0	0	0	2	1	1	1	0	1	0	0	0	0	0	0	0	0	0	0	0	0	0	0	0	0	0	0	0	0	0	0	0	0	0	0	0	0	0	1	0	0
K12527	Metabolism, Metabolism of Other Amino Acids, Selenocompound metabolism, K12527 - putative selenate reductase [EC:1.97.1.9]	ygfK; putative selenate reductase [EC:1.97.1.9]	4	11	10	2	3	2	1	5	2	8	6	7	5	3	8	7	8	9	6	8	4	3	2	2	2	1	3	4	3	0	1	0	0	2	4	5	3	0	2	3	2	4	7	12	6	7	7
K03851	Metabolism, Metabolism of Other Amino Acids, Taurine and hypotaurine metabolism, K03851 - taurine-pyruvate aminotransferase [EC:2.6.1.77]	tpa; taurine-pyruvate aminotransferase [EC:2.6.1.77]	5	8	6	0	0	0	1	1	2	6	3	4	0	0	0	4	1	5	1	5	5	2	1	2	0	0	0	1	2	0	2	2	3	1	1	1	2	3	3	3	2	1	3	4	4	2	4
K02364	Metabolism, Metabolism of Terpenoids and Polyketides, Biosynthesis of siderophore group nonribosomal peptides, K02364 - enterobactin synthetase component F [EC:2.7.7.-]	entF; enterobactin synthetase component F [EC:2.7.7.-]	0	0	0	0	0	0	0	0	0	0	0	0	0	0	0	0	0	0	0	0	0	0	0	0	0	0	0	0	0	0	0	0	1	0	0	0	0	0	0	0	0	0	0	0	0	0	0
K00257	Metabolism, Metabolism of Terpenoids and Polyketides, Geraniol degradation, K00257 - [EC:1.3.99.-]	E1.3.99.-; [EC:1.3.99.-]	1	3	3	1	1	1	1	0	0	1	1	2	0	1	0	0	0	0	1	7	1	3	1	3	3	0	5	1	2	3	2	1	1	4	2	2	3	2	2	0	0	0	0	0	1	2	1
K01041	Metabolism, Metabolism of Terpenoids and Polyketides, Geraniol degradation, K01041 - [EC:2.8.3.-]	E2.8.3.-; [EC:2.8.3.-]	7	9	14	1	10	11	5	8	17	2	13	9	6	11	8	13	26	11	24	20	26	8	5	8	7	8	12	2	4	1	4	2	2	0	2	7	8	5	5	21	19	17	8	14	7	12	5
K13778	Metabolism, Metabolism of Terpenoids and Polyketides, Geraniol degradation, K13778 - geranyl-CoA carboxylase beta subunit [EC:6.4.1.5]	atuC; geranyl-CoA carboxylase beta subunit [EC:6.4.1.5]	0	0	0	0	0	0	0	0	0	0	0	0	0	0	0	0	0	0	0	0	0	0	0	0	0	0	0	0	0	0	0	0	0	1	0	0	0	0	0	0	0	0	0	0	0	0	0
K00067	Metabolism, Metabolism of Terpenoids and Polyketides, Polyketide sugar unit biosynthesis, K00067 - dTDP-4-dehydrorhamnose reductase [EC:1.1.1.133]	rfbD, rmlD; dTDP-4-dehydrorhamnose reductase [EC:1.1.1.133]	0	0	0	0	0	1	0	0	0	0	0	0	0	1	0	0	0	0	0	0	0	0	0	0	0	0	0	0	0	0	0	0	0	0	0	0	0	2	0	0	0	1	0	0	0	0	0
K01710	Metabolism, Metabolism of Terpenoids and Polyketides, Polyketide sugar unit biosynthesis, K01710 - dTDP-glucose 4	E4.2.1.46, rfbB, rffG; dTDP-glucose 4,6-dehydratase [EC:4.2.1.46]	0	0	0	0	0	0	0	0	0	0	0	0	0	0	0	0	0	0	0	0	1	0	0	0	0	0	0	0	0	0	0	0	0	0	0	0	2	1	2	0	0	0	0	0	0	0	0
K01790	Metabolism, Metabolism of Terpenoids and Polyketides, Polyketide sugar unit biosynthesis, K01790 - dTDP-4-dehydrorhamnose 3	rfbC, rmlC; dTDP-4-dehydrorhamnose 3,5-epimerase [EC:5.1.3.13]	1	1	1	0	0	0	1	2	1	1	3	2	0	0	0	0	0	0	4	1	2	0	0	0	3	0	0	0	0	0	2	2	1	0	0	0	3	8	3	0	0	0	0	0	0	1	2
K00795	Metabolism, Metabolism of Terpenoids and Polyketides, Terpenoid backbone biosynthesis, K00795 - farnesyl diphosphate synthase [EC:2.5.1.1 2.5.1.10]	ispA; farnesyl diphosphate synthase [EC:2.5.1.1 2.5.1.10]	0	0	0	0	0	0	0	0	0	0	0	0	0	0	0	0	0	0	0	0	0	0	0	0	0	0	0	0	0	0	0	0	0	0	0	0	0	0	0	0	0	0	0	1	0	0	0
K01662	Metabolism, Metabolism of Terpenoids and Polyketides, Terpenoid backbone biosynthesis, K01662 - 1-deoxy-D-xylulose-5-phosphate synthase [EC:2.2.1.7]	dxs; 1-deoxy-D-xylulose-5-phosphate synthase [EC:2.2.1.7]	0	0	0	0	0	0	0	0	0	0	0	0	0	0	0	0	0	0	0	0	0	0	0	0	0	0	0	0	0	1	1	0	1	0	0	0	0	0	0	0	1	1	0	0	0	0	0
K02523	Metabolism, Metabolism of Terpenoids and Polyketides, Terpenoid backbone biosynthesis, K02523 - octaprenyl-diphosphate synthase [EC:2.5.1.90]	ispB; octaprenyl-diphosphate synthase [EC:2.5.1.90]	0	0	0	0	0	0	0	0	0	0	0	0	0	0	0	0	0	0	0	0	1	0	0	0	0	0	0	0	0	0	0	0	0	0	0	0	0	0	0	0	0	0	0	0	0	0	0
K03526	Metabolism, Metabolism of Terpenoids and Polyketides, Terpenoid backbone biosynthesis, K03526 - (E)-4-hydroxy-3-methylbut-2-enyl-diphosphate synthase [EC:1.17.7.1]	E1.17.7.1, gcpE, ispG; (E)-4-hydroxy-3-methylbut-2-enyl-diphosphate synthase [EC:1.17.7.1]	0	0	0	0	0	0	0	0	0	0	0	0	0	0	0	0	0	0	0	0	0	0	0	0	0	0	0	0	3	3	4	0	1	0	0	0	0	0	0	0	0	0	0	4	1	0	0
K12506	Metabolism, Metabolism of Terpenoids and Polyketides, Terpenoid backbone biosynthesis, K12506 - 2-C-methyl-D-erythritol 4-phosphate cytidylyltransferase / 2-C-methyl-D-erythritol 2	ispDF; 2-C-methyl-D-erythritol 4-phosphate cytidylyltransferase / 2-C-methyl-D-erythritol 2,4-cyclodiphosphate synthase [EC:2.7.7.60 4.6.1.12]	0	1	0	0	0	0	0	0	0	0	0	0	0	0	0	0	0	0	0	0	0	0	0	0	0	0	0	0	0	0	0	0	0	0	0	0	0	0	0	0	0	0	0	0	0	0	0
Glycine	Metabolism, Nucleotide Metabolism, Amino Acid Metabolism, Glycine, K00003 - homoserine dehydrogenase [EC:1.1.1.3]	NA	0	0	0	3	2	2	0	0	0	0	0	0	0	0	0	0	0	0	3	2	1	1	1	0	1	0	1	1	1	0	0	0	0	0	0	2	0	0	0	0	0	0	0	0	0	0	1
K00087	Metabolism, Nucleotide Metabolism, Purine metabolism, K00087 - xanthine dehydrogenase molybdenum-binding subunit [EC:1.17.1.4]	ygeS, xdhA; xanthine dehydrogenase molybdenum-binding subunit [EC:1.17.1.4]	0	0	0	0	0	0	0	0	0	0	0	0	0	0	3	0	0	0	0	1	0	0	0	0	0	0	0	0	0	0	0	0	1	0	0	0	0	0	0	0	0	0	0	0	1	0	0
K00088	Metabolism, Nucleotide Metabolism, Purine metabolism, K00088 - IMP dehydrogenase [EC:1.1.1.205]	guaB; IMP dehydrogenase [EC:1.1.1.205]	0	0	0	0	0	0	1	0	0	0	0	0	0	0	1	0	0	0	0	0	0	0	0	0	0	0	0	0	4	2	0	0	0	0	1	0	0	0	0	0	0	0	0	0	0	0	0
K00525	Metabolism, Nucleotide Metabolism, Purine metabolism, K00525 - ribonucleoside-diphosphate reductase alpha chain [EC:1.17.4.1]	E1.17.4.1A, nrdA, nrdE; ribonucleoside-diphosphate reductase alpha chain [EC:1.17.4.1]	0	0	0	0	0	0	0	0	0	0	0	0	0	0	0	0	0	1	0	0	0	0	0	0	0	0	0	0	0	0	0	0	0	0	0	0	0	0	0	0	0	0	0	0	0	0	0
K00602	Metabolism, Nucleotide Metabolism, Purine metabolism, K00602 - phosphoribosylaminoimidazolecarboxamide formyltransferase / IMP cyclohydrolase [EC:2.1.2.3 3.5.4.10]	purH; phosphoribosylaminoimidazolecarboxamide formyltransferase / IMP cyclohydrolase [EC:2.1.2.3 3.5.4.10]	3	3	3	1	4	10	3	3	4	6	8	4	2	3	1	3	2	5	16	7	8	6	14	12	1	1	8	2	13	13	12	19	18	5	6	4	2	7	2	0	4	0	21	17	16	12	7
K00764	Metabolism, Nucleotide Metabolism, Purine metabolism, K00764 - amidophosphoribosyltransferase [EC:2.4.2.14]	purF, PPAT; amidophosphoribosyltransferase [EC:2.4.2.14]	0	0	0	0	0	0	0	0	0	0	0	0	0	0	0	0	0	0	0	0	0	1	1	1	0	0	0	0	0	0	0	0	0	0	0	0	0	0	0	0	0	0	0	0	0	0	0
K00939	Metabolism, Nucleotide Metabolism, Purine metabolism, K00939 - adenylate kinase [EC:2.7.4.3]	adk, AK; adenylate kinase [EC:2.7.4.3]	0	0	0	0	0	0	0	0	0	0	0	0	0	0	0	0	0	0	0	0	0	0	0	0	0	0	1	0	0	0	0	0	0	0	1	1	0	0	0	0	0	0	0	0	0	0	0
K00962	Metabolism, Nucleotide Metabolism, Purine metabolism, K00962 - polyribonucleotide nucleotidyltransferase [EC:2.7.7.8]	pnp, PNPT1; polyribonucleotide nucleotidyltransferase [EC:2.7.7.8]	0	3	1	0	0	1	0	0	0	0	0	1	1	0	0	1	0	1	10	2	1	2	6	5	1	0	2	0	4	5	0	1	0	2	0	0	0	0	0	0	0	0	5	4	2	1	0
K01081	Metabolism, Nucleotide Metabolism, Purine metabolism, K01081 - 5'-nucleotidase [EC:3.1.3.5]	E3.1.3.5; 5'-nucleotidase [EC:3.1.3.5]	2	5	2	2	2	0	0	2	3	0	0	0	2	0	1	0	1	1	1	1	1	5	3	5	0	1	1	4	3	2	2	2	4	2	3	2	2	1	0	2	2	4	1	1	1	3	2
K01119	Metabolism, Nucleotide Metabolism, Purine metabolism, K01119 - 2'	cpdB; 2',3'-cyclic-nucleotide 2'-phosphodiesterase / 3'-nucleotidase [EC:3.1.4.16 3.1.3.6]	0	1	0	0	0	0	0	0	0	0	1	0	0	0	0	4	4	2	0	0	0	0	0	0	0	0	0	0	0	0	0	0	0	0	0	0	0	0	0	0	0	0	0	0	0	0	0
K01139	Metabolism, Nucleotide Metabolism, Purine metabolism, K01139 - guanosine-3'	spoT, HDDC3; guanosine-3',5'-bis(diphosphate) 3'-pyrophosphohydrolase [EC:3.1.7.2]	0	0	0	0	0	1	0	0	0	0	0	0	0	0	0	0	0	0	0	0	0	0	0	0	0	0	0	0	0	0	0	0	0	0	1	0	0	0	0	0	0	0	0	0	0	0	0
K01239	Metabolism, Nucleotide Metabolism, Purine metabolism, K01239 - purine nucleosidase [EC:3.2.2.1]	iunH; purine nucleosidase [EC:3.2.2.1]	1	0	1	1	1	3	0	0	0	0	0	0	0	0	0	0	0	0	0	1	0	0	1	0	0	0	0	0	0	0	0	0	0	0	0	1	0	1	0	0	0	0	0	0	0	0	0
K01428	Metabolism, Nucleotide Metabolism, Purine metabolism, K01428 - urease subunit alpha [EC:3.5.1.5]	ureC; urease subunit alpha [EC:3.5.1.5]	0	3	1	5	2	2	3	5	6	7	5	2	3	1	5	2	0	3	5	0	2	3	2	1	5	8	3	2	1	0	0	0	0	2	1	1	1	0	2	4	1	0	0	0	0	0	2
K01486	Metabolism, Nucleotide Metabolism, Purine metabolism, K01486 - adenine deaminase [EC:3.5.4.2]	ade; adenine deaminase [EC:3.5.4.2]	0	1	0	0	0	0	0	1	0	2	1	1	2	0	2	1	1	1	2	2	1	0	0	0	1	0	0	0	0	0	0	0	0	0	0	0	0	0	0	0	0	0	0	0	0	0	0
K01492	Metabolism, Nucleotide Metabolism, Purine metabolism, K01492 - phosphoribosylaminoimidazolecarboxamide formyltransferase [EC:2.1.2.3]	E2.1.2.3; phosphoribosylaminoimidazolecarboxamide formyltransferase [EC:2.1.2.3]	2	1	1	1	3	1	3	0	0	1	2	2	2	1	2	1	1	1	4	0	0	2	6	5	0	0	0	0	1	1	1	2	2	0	0	1	1	2	1	0	1	0	2	0	1	3	3
K01525	Metabolism, Nucleotide Metabolism, Purine metabolism, K01525 - bis(5'-nucleosyl)-tetraphosphatase (symmetrical) [EC:3.6.1.41]	apaH; bis(5'-nucleosyl)-tetraphosphatase (symmetrical) [EC:3.6.1.41]	0	0	0	0	0	0	0	0	0	0	0	0	0	0	0	0	0	0	0	0	0	0	0	0	0	0	1	0	0	0	0	0	0	0	0	0	0	0	0	0	0	0	0	0	0	0	0
K01589	Metabolism, Nucleotide Metabolism, Purine metabolism, K01589 - 5-(carboxyamino)imidazole ribonucleotide synthase [EC:6.3.4.18]	purK; 5-(carboxyamino)imidazole ribonucleotide synthase [EC:6.3.4.18]	0	0	0	0	0	0	0	0	0	0	0	0	0	0	0	0	0	0	0	0	0	0	0	0	0	0	0	1	0	0	0	0	0	0	0	0	0	0	0	0	0	0	0	0	0	0	0
K01756	Metabolism, Nucleotide Metabolism, Purine metabolism, K01756 - adenylosuccinate lyase [EC:4.3.2.2]	purB, ADSL; adenylosuccinate lyase [EC:4.3.2.2]	0	0	0	0	0	0	0	0	0	0	0	0	0	0	0	0	0	1	0	0	0	0	0	0	0	0	0	0	0	0	0	0	0	0	0	0	0	0	0	0	0	0	0	0	0	0	0
K01939	Metabolism, Nucleotide Metabolism, Purine metabolism, K01939 - adenylosuccinate synthase [EC:6.3.4.4]	purA, ADSS; adenylosuccinate synthase [EC:6.3.4.4]	7	2	2	0	2	5	0	2	1	0	1	3	4	0	1	1	4	3	15	22	14	16	16	26	1	0	5	1	24	12	9	7	6	4	8	11	6	2	2	3	4	3	15	11	11	11	10
K01951	Metabolism, Nucleotide Metabolism, Purine metabolism, K01951 - GMP synthase (glutamine-hydrolysing) [EC:6.3.5.2]	guaA, GMPS; GMP synthase (glutamine-hydrolysing) [EC:6.3.5.2]	0	0	0	0	0	0	0	0	0	1	0	0	0	0	0	0	0	0	0	0	0	0	0	0	0	0	0	0	0	1	0	0	0	0	0	0	0	0	0	0	0	0	0	5	0	0	0
K01952	Metabolism, Nucleotide Metabolism, Purine metabolism, K01952 - phosphoribosylformylglycinamidine synthase [EC:6.3.5.3]	purL, PFAS; phosphoribosylformylglycinamidine synthase [EC:6.3.5.3]	0	0	1	3	3	0	0	0	0	0	1	0	1	0	0	0	1	0	4	3	4	1	1	7	1	0	0	3	26	16	11	0	0	1	6	5	0	0	0	0	0	0	5	6	8	1	0
K02335	Metabolism, Nucleotide Metabolism, Purine metabolism, K02335 - DNA polymerase I [EC:2.7.7.7]	DPO1, polA; DNA polymerase I [EC:2.7.7.7]	0	1	0	0	1	1	0	0	0	1	1	0	0	0	0	0	0	1	0	1	0	1	0	1	1	1	1	0	0	0	1	0	0	0	0	1	0	0	0	1	0	2	0	0	1	1	0
K02338	Metabolism, Nucleotide Metabolism, Purine metabolism, K02338 - DNA polymerase III subunit beta [EC:2.7.7.7]	DPO3B, dnaN; DNA polymerase III subunit beta [EC:2.7.7.7]	1	2	1	0	1	1	1	2	2	3	3	3	0	0	0	0	0	0	6	2	6	0	0	1	2	0	3	9	7	6	8	1	0	0	0	1	2	0	1	2	2	1	0	0	0	1	1
K02342	Metabolism, Nucleotide Metabolism, Purine metabolism, K02342 - DNA polymerase III subunit epsilon [EC:2.7.7.7]	DPO3E, dnaQ; DNA polymerase III subunit epsilon [EC:2.7.7.7]	0	0	0	0	0	0	0	0	0	0	0	0	0	0	0	0	0	0	0	0	0	0	0	0	0	0	0	0	0	0	0	0	0	0	0	0	0	0	0	0	1	0	0	0	0	0	0
K02343	Metabolism, Nucleotide Metabolism, Purine metabolism, K02343 - DNA polymerase III subunit gamma/tau [EC:2.7.7.7]	DPO3G, dnaX; DNA polymerase III subunit gamma/tau [EC:2.7.7.7]	0	0	0	0	0	1	0	0	1	0	0	0	0	0	0	0	0	0	0	0	0	0	0	0	0	0	0	0	0	0	0	1	1	0	0	0	0	0	0	0	0	0	0	0	0	0	0
K03043	Metabolism, Nucleotide Metabolism, Purine metabolism, K03043 - DNA-directed RNA polymerase subunit beta [EC:2.7.7.6]	rpoB; DNA-directed RNA polymerase subunit beta [EC:2.7.7.6]	0	0	0	0	0	0	0	0	0	0	0	0	0	0	0	0	0	0	1	0	0	0	0	0	0	0	0	0	1	0	1	0	0	0	0	0	0	0	0	0	0	0	0	0	0	0	0
K03046	Metabolism, Nucleotide Metabolism, Purine metabolism, K03046 - DNA-directed RNA polymerase subunit beta' [EC:2.7.7.6]	rpoC; DNA-directed RNA polymerase subunit beta' [EC:2.7.7.6]	0	0	0	0	0	0	0	0	0	0	0	0	0	0	0	0	0	0	2	2	0	0	0	1	0	0	0	0	2	2	0	2	0	1	0	0	0	0	0	0	0	0	0	0	0	2	2
K03763	Metabolism, Nucleotide Metabolism, Purine metabolism, K03763 - DNA polymerase III subunit alpha	DPO3A2, polC; DNA polymerase III subunit alpha, Gram-positive type [EC:2.7.7.7]	1	0	0	0	0	0	0	0	0	0	0	0	0	0	0	0	0	0	1	0	0	0	0	0	0	0	0	0	0	0	0	0	0	0	0	0	0	0	0	0	0	0	0	0	0	0	0
K08289	Metabolism, Nucleotide Metabolism, Purine metabolism, K08289 - phosphoribosylglycinamide formyltransferase 2 [EC:2.1.2.2]	purT; phosphoribosylglycinamide formyltransferase 2 [EC:2.1.2.2]	0	2	1	0	0	2	0	1	0	0	0	1	3	1	0	0	0	1	4	6	8	1	1	1	5	0	2	0	4	3	0	0	0	0	0	0	4	1	0	0	0	0	0	0	0	1	1
K10213	Metabolism, Nucleotide Metabolism, Purine metabolism, K10213 - ribosylpyrimidine nucleosidase [EC:3.2.2.8]	rihB; ribosylpyrimidine nucleosidase [EC:3.2.2.8]	0	0	0	0	0	0	0	0	0	0	0	0	0	0	1	0	0	0	0	0	0	0	0	0	0	0	0	0	0	0	0	0	0	0	0	0	0	0	0	0	0	0	0	0	0	0	0
K11751	Metabolism, Nucleotide Metabolism, Purine metabolism, K11751 - 5'-nucleotidase / UDP-sugar diphosphatase [EC:3.1.3.5 3.6.1.45]	ushA; 5'-nucleotidase / UDP-sugar diphosphatase [EC:3.1.3.5 3.6.1.45]	0	0	0	0	0	0	0	0	0	0	0	0	0	0	0	0	0	0	0	0	0	0	0	0	0	0	0	0	0	0	0	0	0	0	0	0	0	0	0	0	0	1	0	0	0	0	0
K14048	Metabolism, Nucleotide Metabolism, Purine metabolism, K14048 - urease subunit gamma/beta [EC:3.5.1.5]	ureAB; urease subunit gamma/beta [EC:3.5.1.5]	0	0	0	0	0	0	0	0	0	0	0	0	1	0	0	0	0	0	0	0	0	0	0	0	0	0	0	0	0	0	0	0	0	0	0	0	0	0	0	0	0	0	0	0	0	0	0
K00226	Metabolism, Nucleotide Metabolism, Pyrimidine metabolism, K00226 - dihydroorotate dehydrogenase (fumarate) [EC:1.3.98.1]	pyrD; dihydroorotate dehydrogenase (fumarate) [EC:1.3.98.1]	0	0	0	0	0	0	0	0	0	0	1	1	0	0	0	0	0	0	0	0	0	0	0	0	0	0	0	0	0	0	0	0	0	0	0	0	0	0	0	0	0	0	0	0	0	0	0
K00384	Metabolism, Nucleotide Metabolism, Pyrimidine metabolism, K00384 - thioredoxin reductase (NADPH) [EC:1.8.1.9]	trxB; thioredoxin reductase (NADPH) [EC:1.8.1.9]	0	0	0	0	0	0	0	0	0	1	0	1	0	0	0	0	0	0	0	0	0	0	0	0	0	0	0	0	0	0	0	2	0	0	0	0	0	0	0	0	0	0	1	0	0	0	0
K00757	Metabolism, Nucleotide Metabolism, Pyrimidine metabolism, K00757 - uridine phosphorylase [EC:2.4.2.3]	udp, UPP; uridine phosphorylase [EC:2.4.2.3]	0	0	0	0	0	0	0	0	0	0	0	0	0	0	0	0	0	0	0	0	0	0	0	0	0	0	0	0	1	0	0	1	0	0	0	0	0	0	0	0	0	0	3	0	0	0	0
K00857	Metabolism, Nucleotide Metabolism, Pyrimidine metabolism, K00857 - thymidine kinase [EC:2.7.1.21]	tdk, TK; thymidine kinase [EC:2.7.1.21]	0	0	0	0	0	0	0	0	0	0	0	0	0	0	0	0	0	0	0	1	0	0	0	0	0	0	0	0	0	0	0	0	0	0	0	0	0	0	0	0	0	0	0	0	0	0	0
K00876	Metabolism, Nucleotide Metabolism, Pyrimidine metabolism, K00876 - uridine kinase [EC:2.7.1.48]	udk, UCK; uridine kinase [EC:2.7.1.48]	0	0	0	0	0	0	0	0	0	0	0	0	0	0	0	0	0	1	3	3	6	0	0	0	0	0	0	0	3	0	1	1	1	0	0	0	0	0	0	1	0	0	0	1	0	0	0
K00945	Metabolism, Nucleotide Metabolism, Pyrimidine metabolism, K00945 - cytidylate kinase [EC:2.7.4.14]	cmk; cytidylate kinase [EC:2.7.4.14]	18	18	9	1	8	7	3	6	8	0	0	0	0	0	0	0	0	0	0	0	0	3	1	1	0	0	0	6	13	3	0	0	0	0	0	0	0	9	12	4	6	3	0	0	0	23	9
K01464	Metabolism, Nucleotide Metabolism, Pyrimidine metabolism, K01464 - dihydropyrimidinase [EC:3.5.2.2]	DPYS, dht, hydA; dihydropyrimidinase [EC:3.5.2.2]	0	1	2	0	0	2	1	1	1	3	3	3	1	2	2	1	3	2	3	1	2	0	0	0	1	1	0	0	0	0	0	0	0	1	0	1	0	2	0	1	1	1	0	0	2	2	2
K01465	Metabolism, Nucleotide Metabolism, Pyrimidine metabolism, K01465 - dihydroorotase [EC:3.5.2.3]	URA4, pyrC; dihydroorotase [EC:3.5.2.3]	3	3	2	0	3	3	1	3	2	0	2	0	2	5	4	1	1	1	3	2	4	2	5	3	1	2	0	3	4	5	5	3	6	0	1	3	0	1	0	0	4	3	2	3	3	2	1
K01591	Metabolism, Nucleotide Metabolism, Pyrimidine metabolism, K01591 - orotidine-5'-phosphate decarboxylase [EC:4.1.1.23]	pyrF; orotidine-5'-phosphate decarboxylase [EC:4.1.1.23]	0	0	0	0	0	0	0	0	0	0	0	0	0	0	0	0	0	0	0	0	0	0	0	0	0	0	0	0	0	0	0	0	0	0	0	0	0	0	0	0	1	1	1	0	0	0	0
K01937	Metabolism, Nucleotide Metabolism, Pyrimidine metabolism, K01937 - CTP synthase [EC:6.3.4.2]	pyrG, CTPS; CTP synthase [EC:6.3.4.2]	0	0	0	0	0	0	0	0	0	0	0	0	0	2	0	0	0	0	0	0	0	0	0	0	0	0	0	0	5	2	2	1	2	0	0	0	0	0	0	0	0	0	2	2	1	0	0
K01955	Metabolism, Nucleotide Metabolism, Pyrimidine metabolism, K01955 - carbamoyl-phosphate synthase large subunit [EC:6.3.5.5]	carB, CPA2; carbamoyl-phosphate synthase large subunit [EC:6.3.5.5]	0	0	0	0	0	0	0	0	0	0	0	0	0	0	0	0	0	0	0	0	0	0	0	0	0	0	0	0	0	0	0	0	0	0	0	0	0	0	0	0	0	0	1	0	0	0	0
K01956	Metabolism, Nucleotide Metabolism, Pyrimidine metabolism, K01956 - carbamoyl-phosphate synthase small subunit [EC:6.3.5.5]	carA, CPA1; carbamoyl-phosphate synthase small subunit [EC:6.3.5.5]	0	0	0	0	0	0	0	0	0	0	0	1	0	0	0	0	0	0	0	0	0	0	1	0	0	0	1	0	0	0	0	0	0	0	0	0	0	0	0	0	0	0	0	0	0	0	0
K09903	Metabolism, Nucleotide Metabolism, Pyrimidine metabolism, K09903 - uridylate kinase [EC:2.7.4.22]	pyrH; uridylate kinase [EC:2.7.4.22]	0	0	0	0	0	0	0	0	0	0	0	0	0	0	0	0	0	0	0	0	0	0	0	0	0	0	0	0	0	0	0	1	1	0	0	0	0	0	0	0	0	0	0	0	0	0	0
K01781	Metabolism, Xenobiotics Biodegradation and Metabolism, Aminobenzoate degradation, K01781 - mandelate racemase [EC:5.1.2.2]	mdlA; mandelate racemase [EC:5.1.2.2]	0	1	0	0	0	0	4	4	4	0	0	0	1	0	1	1	0	1	0	0	0	0	0	0	0	0	0	0	0	0	0	0	0	0	0	0	1	0	0	0	0	0	0	0	1	0	0
K06446	Metabolism, Xenobiotics Biodegradation and Metabolism, Caprolactam degradation, K06446 - acyl-CoA dehydrogenase [EC:1.3.99.-]	DCAA; acyl-CoA dehydrogenase [EC:1.3.99.-]	0	0	0	0	0	0	0	0	1	1	0	1	0	0	0	0	0	0	0	0	0	0	0	0	0	0	0	0	0	0	0	0	0	0	0	0	0	0	0	0	0	0	0	1	0	0	0
K01564	Metabolism, Xenobiotics Biodegradation and Metabolism, Chloroalkane and chloroalkene degradation, K01564 - [EC:3.8.1.-]	E3.8.1.-; [EC:3.8.1.-]	0	0	0	0	0	0	0	0	0	0	0	0	0	0	0	0	0	0	0	0	0	0	0	0	0	0	0	0	0	0	1	0	0	0	0	0	0	0	0	0	0	0	0	0	0	0	0
K03927	Metabolism, Xenobiotics Biodegradation and Metabolism, Drug metabolism - other enzymes, K03927 - carboxylesterase 2 [EC:3.1.1.1 3.1.1.84 3.1.1.56]	CES2; carboxylesterase 2 [EC:3.1.1.1 3.1.1.84 3.1.1.56]	0	0	0	0	0	0	0	0	0	0	0	0	0	0	0	0	1	0	0	0	0	0	0	0	0	0	0	0	0	0	0	0	0	0	0	0	0	0	0	0	0	0	0	0	0	0	1
K01860	Metabolism, Xenobiotics Biodegradation and Metabolism, Fluorobenzoate degradation, K01860 - chloromuconate cycloisomerase [EC:5.5.1.7]	E5.5.1.7; chloromuconate cycloisomerase [EC:5.5.1.7]	0	0	0	0	0	0	0	0	1	0	0	0	0	0	0	0	0	0	0	0	0	0	0	0	0	0	0	0	0	0	0	0	0	0	0	0	0	0	0	0	0	0	0	0	0	0	0
K06281	Metabolism, Xenobiotics Biodegradation and Metabolism, Nitrotoluene degradation, K06281 - hydrogenase large subunit [EC:1.12.99.6]	hyaB, hybC; hydrogenase large subunit [EC:1.12.99.6]	0	0	0	0	1	1	0	0	0	0	0	0	0	0	0	1	0	0	1	1	1	1	1	0	0	0	0	0	0	0	2	3	1	0	0	1	0	0	0	0	2	3	0	0	0	1	1
K10678	Metabolism, Xenobiotics Biodegradation and Metabolism, Nitrotoluene degradation, K10678 - nitroreductase [EC:1.-.-.-]	nfsA; nitroreductase [EC:1.-.-.-]	0	0	0	0	0	0	0	0	0	0	0	0	0	0	0	0	0	0	0	0	0	0	0	0	0	0	0	0	0	0	0	0	0	0	0	0	0	0	0	0	0	0	0	0	1	0	0
K10680	Metabolism, Xenobiotics Biodegradation and Metabolism, Nitrotoluene degradation, K10680 - N-ethylmaleimide reductase [EC:1.-.-.-]	nemA; N-ethylmaleimide reductase [EC:1.-.-.-]	0	0	0	0	0	0	0	0	0	0	0	0	0	0	0	0	1	0	0	0	0	0	0	0	0	0	0	0	0	0	0	0	0	0	0	0	0	0	0	0	0	0	0	0	0	0	0
K11180	Metabolism, Xenobiotics Biodegradation and Metabolism, Nitrotoluene degradation, K11180 - sulfite reductase	dsrA; sulfite reductase alpha subunit [EC:1.8.99.3 1.8.99.1]	0	0	0	0	0	0	0	0	0	0	0	1	0	0	0	0	0	1	2	3	1	0	0	1	0	0	0	0	0	0	1	0	0	0	0	0	0	3	0	2	0	1	0	3	2	2	1
K11181	Metabolism, Xenobiotics Biodegradation and Metabolism, Nitrotoluene degradation, K11181 - sulfite reductase	dsrB; sulfite reductase beta subunit [EC:1.8.99.3 1.8.99.1]	0	0	0	0	0	0	0	0	0	0	1	0	0	0	0	0	0	1	0	0	0	0	0	0	0	0	0	0	0	0	0	0	0	0	0	0	0	1	0	0	0	0	0	1	0	0	0
K01278	Organismal Systems, Digestive System, Protein digestion and absorption, K01278 - dipeptidyl-peptidase 4 [EC:3.4.14.5]	DPP4; dipeptidyl-peptidase 4 [EC:3.4.14.5]	0	0	0	0	0	0	0	0	0	0	0	0	0	4	1	0	1	0	1	0	2	0	0	0	0	0	0	0	0	0	0	1	0	0	0	0	0	0	0	0	0	0	0	1	0	1	0
K02358	Organismal Systems, Environmental Adaptation, Plant-pathogen interaction, K02358 - elongation factor Tu	NA	0	1	0	0	0	0	0	0	0	0	0	0	1	0	0	0	0	0	7	1	3	1	1	2	1	0	1	2	7	5	0	2	1	1	1	1	2	0	1	0	0	0	3	3	0	3	4
K06027	Organismal Systems, Excretory System, Vasopressin-regulated water reabsorption, K06027 - vesicle-fusing ATPase [EC:3.6.4.6]	NSF; vesicle-fusing ATPase [EC:3.6.4.6]	0	0	0	0	0	0	0	0	0	0	0	0	0	0	0	0	0	0	0	0	0	0	0	0	0	0	0	0	0	0	0	0	0	0	0	0	0	0	0	0	0	0	0	0	0	0	0
K00091	Unclassified, K00091	NA	0	0	0	0	0	0	0	0	0	0	0	0	0	0	0	0	0	0	0	0	0	0	0	0	0	0	0	0	0	0	0	0	1	0	0	0	0	0	0	0	0	0	0	0	0	0	0
K00118	Unclassified, K00118	NA	0	0	0	0	0	0	0	0	0	0	0	0	0	0	0	0	0	0	0	0	0	0	0	0	0	0	0	0	0	0	0	0	0	0	0	0	0	0	0	0	0	0	0	1	0	0	0
K00120	Unclassified, K00120	NA	0	0	0	0	0	0	0	0	0	0	0	0	0	0	0	0	0	0	0	0	0	0	0	0	0	0	0	0	0	0	0	0	0	0	0	0	0	0	0	0	0	0	1	0	0	0	0
K00180	Unclassified, K00180	NA	0	0	0	0	0	0	0	0	0	0	0	0	0	0	0	0	0	0	0	0	0	0	0	0	0	0	0	0	0	0	0	0	1	0	0	0	0	0	0	0	0	0	0	0	0	0	0
K00183	Unclassified, K00183	NA	0	0	0	0	0	2	0	0	0	1	1	0	0	0	0	0	0	0	0	0	1	0	0	1	0	0	0	0	1	1	0	0	0	0	0	0	0	1	0	1	1	1	1	1	1	0	0
K00219	Unclassified, K00219	NA	0	0	0	0	0	0	0	0	0	0	0	0	0	0	0	0	0	0	0	0	0	0	0	0	0	0	0	0	0	2	0	0	0	0	0	0	0	0	0	0	0	0	0	0	0	0	0
K00311	Unclassified, K00311	NA	1	0	0	0	0	0	0	0	0	0	0	0	0	0	0	0	0	0	0	0	0	0	0	1	0	0	0	0	0	0	0	0	0	0	0	0	0	0	0	0	0	0	0	2	0	0	0
K00351	Unclassified, K00351	NA	0	0	0	0	0	0	0	0	0	0	0	0	0	0	0	0	0	0	0	0	0	0	0	0	0	0	0	0	1	0	0	0	0	0	0	0	0	0	0	0	0	0	0	0	0	0	0
K00359	Unclassified, K00359	NA	0	0	0	0	0	0	0	0	0	0	0	0	0	0	0	0	0	0	1	0	0	0	0	0	0	1	0	0	0	0	0	0	0	0	0	0	0	0	0	0	0	0	0	0	0	0	0
K00378	Unclassified, K00378	NA	1	1	1	0	0	5	1	0	1	1	2	2	0	1	1	0	0	0	1	1	0	5	6	3	0	0	2	0	0	0	2	0	1	1	3	1	0	0	0	0	1	0	1	0	4	2	0
K00386	Unclassified, K00386	NA	0	0	0	0	0	0	0	0	0	0	0	0	0	0	0	0	0	0	0	0	0	0	0	0	0	0	0	0	0	0	0	0	0	0	0	0	0	0	0	0	0	0	0	1	0	0	0
K00428	Unclassified, K00428	NA	0	1	1	0	0	0	0	1	1	0	0	1	1	0	1	0	0	1	0	1	0	0	0	0	1	0	1	0	0	0	0	0	0	0	0	0	0	0	0	0	1	0	0	0	0	0	0
K00518	Unclassified, K00518	NA	0	0	0	0	0	0	0	0	0	0	0	0	0	0	0	0	0	0	0	0	0	0	0	0	0	0	0	1	2	1	2	1	2	1	0	0	0	0	0	0	0	0	0	0	0	0	0
K00520	Unclassified, K00520	NA	0	0	0	0	0	0	0	0	0	0	0	0	0	0	0	0	0	0	0	0	0	1	0	1	0	0	0	0	0	0	0	0	0	0	0	0	0	0	0	0	0	0	1	0	0	0	0
K00537	Unclassified, K00537	NA	0	0	0	0	0	0	1	0	0	0	0	0	0	0	0	0	0	0	0	0	0	0	0	0	0	0	0	0	0	0	0	0	0	0	0	0	0	0	0	0	0	0	0	0	0	0	0
K00540	Unclassified, K00540	NA	0	0	0	0	1	0	0	1	1	1	0	0	0	1	0	1	1	1	3	1	2	1	2	1	0	0	0	0	2	0	0	0	0	0	0	0	0	0	0	0	0	1	1	1	0	1	0
K00567	Unclassified, K00567	NA	0	0	0	0	0	0	0	0	0	0	0	0	0	0	0	0	0	0	0	0	0	0	0	0	0	0	0	0	0	0	0	0	0	0	0	0	0	0	0	0	0	0	0	0	0	0	1
K00571	Unclassified, K00571	NA	1	0	0	0	0	0	0	0	0	0	0	0	0	0	0	0	0	0	0	0	0	0	0	0	0	0	0	0	0	0	0	0	0	0	0	0	0	0	0	0	0	0	0	0	0	0	0
K00701	Unclassified, K00701	NA	0	0	0	0	0	0	0	0	0	0	0	0	2	0	0	0	0	0	1	0	0	5	2	6	0	0	0	0	0	0	0	0	0	0	0	5	3	0	0	0	0	0	0	0	0	0	0
K00712	Unclassified, K00712	NA	0	0	0	0	0	0	0	0	0	0	0	0	0	0	0	0	0	0	0	0	0	0	0	0	0	0	0	0	0	0	0	0	0	0	0	0	0	0	0	0	0	0	0	1	0	0	0
K00713	Unclassified, K00713	NA	0	0	1	0	0	0	0	0	0	0	0	0	0	0	0	0	0	0	0	0	0	0	0	0	0	0	0	0	0	0	0	0	0	0	0	0	0	0	0	0	0	0	0	0	0	0	0
K00773	Unclassified, K00773	NA	0	0	0	0	0	0	0	0	0	0	0	0	0	0	0	0	0	0	0	0	0	0	0	0	0	0	0	0	0	0	0	0	0	0	1	0	0	0	0	0	0	0	0	0	0	0	0
K00786	Unclassified, K00786	NA	0	0	0	0	0	0	0	0	0	0	0	0	1	0	0	0	0	0	0	0	0	0	0	0	0	0	0	0	0	0	0	0	0	0	0	0	0	0	0	0	0	0	0	0	0	0	0
K00828	Unclassified, K00828	NA	0	0	0	2	0	0	0	0	0	0	0	0	0	0	0	0	0	0	0	0	0	0	0	0	0	0	0	0	0	0	0	0	0	0	0	0	0	0	0	0	0	0	0	0	0	0	0
K00837	Unclassified, K00837	NA	0	0	0	0	0	0	0	0	0	0	1	1	0	1	0	0	0	0	1	2	0	0	0	0	0	0	1	0	1	0	0	0	0	0	0	0	0	0	0	0	0	0	0	0	0	0	2
K00839	Unclassified, K00839	NA	0	0	0	2	1	0	0	0	1	2	2	1	0	0	2	0	0	0	1	0	1	0	0	3	0	0	0	0	0	0	0	0	0	0	0	0	0	0	0	0	0	0	0	0	0	0	1
K00842	Unclassified, K00842	NA	0	0	0	0	0	0	0	0	0	0	0	0	0	0	0	0	0	0	0	0	0	0	0	0	0	0	0	2	2	0	0	0	0	0	0	0	0	0	0	0	0	0	0	0	0	0	0
K00924	Unclassified, K00924	NA	2	4	5	3	4	4	4	5	6	5	8	7	4	3	4	3	1	0	4	4	5	2	2	2	3	1	4	3	4	3	4	0	0	3	3	4	6	1	2	1	1	1	4	3	7	5	3
K00936	Unclassified, K00936	NA	0	0	1	0	1	3	0	1	0	0	1	0	0	0	0	0	0	0	0	0	0	0	1	0	0	0	0	0	2	0	0	1	0	0	0	0	0	0	1	0	1	0	1	0	1	0	0
K00992	Unclassified, K00992	NA	0	0	0	0	0	0	0	0	0	0	0	0	0	0	0	0	0	0	0	0	0	0	0	0	0	0	0	0	0	0	0	0	0	0	0	0	0	1	1	0	0	0	0	0	0	0	0
K01023	Unclassified, K01023	NA	4	2	2	0	0	0	0	0	0	0	0	0	0	0	0	0	0	0	6	6	9	0	0	0	0	0	0	0	1	1	0	2	2	0	0	0	0	0	0	2	5	7	0	0	0	5	4
K01090	Unclassified, K01090	NA	0	0	1	0	0	0	0	0	0	1	0	0	0	0	0	0	0	0	0	0	0	0	0	0	0	0	0	0	0	0	0	0	0	0	0	0	0	0	0	0	1	0	0	0	0	0	0
K01138	Unclassified, K01138	NA	0	0	1	0	0	0	0	0	0	1	0	1	0	0	0	0	0	0	0	1	1	1	0	0	1	0	1	0	0	0	0	0	0	0	0	2	1	0	1	0	0	0	1	1	2	1	1
K01144	Unclassified, K01144	NA	0	0	0	0	0	0	0	0	0	0	0	0	0	0	0	0	0	0	0	0	0	0	0	0	0	0	0	0	0	1	0	0	1	0	0	0	0	0	0	0	0	0	0	0	0	0	0
K01153	Unclassified, K01153	NA	0	0	0	0	0	0	0	0	0	0	1	0	0	0	0	1	0	0	0	0	0	0	0	1	0	0	0	0	0	0	0	0	0	0	0	0	0	0	0	0	0	0	0	0	0	0	0
K01154	Unclassified, K01154	NA	0	0	0	0	0	0	0	0	0	0	0	0	0	0	0	0	0	1	0	0	0	0	0	0	0	0	0	1	0	0	0	0	1	0	0	0	0	0	0	0	0	0	0	0	0	0	0
K01155	Unclassified, K01155	NA	0	0	0	0	0	0	0	0	0	0	0	1	0	0	0	0	0	0	0	0	0	0	0	0	0	0	0	0	0	0	0	0	0	0	0	1	0	0	0	0	0	0	0	0	0	0	0
K01156	Unclassified, K01156	NA	0	0	0	1	0	0	0	0	0	0	0	0	0	0	0	0	0	0	0	0	0	0	0	0	0	0	0	0	0	0	0	0	0	0	0	0	0	0	0	0	0	0	0	0	0	0	0
K01181	Unclassified, K01181	NA	0	0	0	0	0	0	1	0	2	0	0	0	0	0	0	0	0	0	0	0	0	1	0	0	0	0	0	0	0	0	0	0	0	1	0	1	0	0	0	0	0	0	1	0	0	0	0
K01185	Unclassified, K01185	NA	0	0	0	0	0	0	0	0	0	0	0	0	0	0	0	0	0	0	0	1	0	0	0	0	0	0	0	0	0	0	0	0	0	0	0	0	0	0	0	0	0	0	0	0	0	0	0
K01200	Unclassified, K01200	NA	2	2	8	1	1	0	1	1	1	6	6	7	10	5	9	0	0	0	9	1	3	5	3	5	1	1	1	5	5	0	0	0	0	0	0	3	6	5	0	0	6	5	9	7	1	0	2
K01215	Unclassified, K01215	NA	0	0	0	0	0	0	0	3	1	1	3	1	0	0	0	0	1	1	0	0	0	0	0	0	1	0	2	0	0	0	0	0	0	0	0	0	0	0	0	0	0	0	0	0	0	0	0
K01216	Unclassified, K01216	NA	0	0	0	0	0	0	0	0	0	0	0	0	0	1	0	0	0	0	0	0	1	0	0	0	0	0	0	0	0	0	0	0	0	0	0	0	0	1	0	0	0	0	0	0	0	0	0
K01224	Unclassified, K01224	NA	0	0	0	0	0	0	0	0	1	0	0	0	0	0	0	0	1	0	0	0	1	0	0	0	0	0	0	0	0	0	0	0	0	0	1	0	0	0	0	0	0	0	1	0	0	0	0
K01234	Unclassified, K01234	NA	0	0	0	0	0	0	0	0	0	0	0	0	0	0	0	0	0	0	0	1	0	0	0	0	0	0	0	0	0	0	0	0	0	0	0	0	0	0	0	0	0	0	0	0	0	0	0
K01235	Unclassified, K01235	NA	0	0	0	0	0	0	1	0	0	0	0	0	0	0	1	0	0	0	0	0	0	1	0	0	0	0	0	0	1	0	0	0	0	0	0	0	0	0	0	0	0	0	0	0	0	0	1
K01238	Unclassified, K01238	NA	2	2	1	2	0	2	1	2	3	6	5	3	2	1	3	0	1	1	9	11	8	1	1	3	0	0	3	1	2	1	0	0	1	0	0	3	0	1	1	0	1	1	0	1	1	0	0
K01258	Unclassified, K01258	NA	0	4	6	3	1	2	0	4	2	6	5	7	7	2	6	1	1	4	5	3	5	3	3	2	4	0	3	0	1	2	6	1	2	0	1	2	5	0	1	3	5	2	2	1	5	2	1
K01261	Unclassified, K01261	NA	2	0	1	0	0	1	0	0	0	0	0	0	0	0	0	0	0	0	0	0	0	2	1	1	1	0	0	0	0	0	0	0	0	0	0	1	0	0	0	0	2	0	0	0	0	0	0
K01262	Unclassified, K01262	NA	4	3	5	0	5	6	1	2	6	6	11	8	4	3	5	6	4	3	9	8	17	8	9	5	1	1	2	6	11	8	6	4	3	1	5	9	2	4	4	8	6	7	7	7	10	2	4
K01269	Unclassified, K01269	NA	16	32	16	15	14	21	20	16	20	40	42	34	13	17	13	10	16	14	19	15	20	23	30	22	14	8	13	19	20	21	23	15	16	7	13	18	14	14	13	7	31	26	25	24	40	15	16
K01271	Unclassified, K01271	NA	0	1	0	0	0	0	0	0	2	0	0	0	0	3	0	0	0	0	0	1	3	0	0	0	0	0	1	0	2	2	0	0	0	0	1	0	0	2	0	0	1	0	3	3	1	1	0
K01273	Unclassified, K01273	NA	0	0	0	0	0	1	0	0	0	0	0	0	0	0	0	0	0	0	0	0	0	0	0	0	0	0	0	0	0	0	0	0	0	0	0	0	0	0	0	0	0	0	0	0	0	0	0
K01277	Unclassified, K01277	NA	0	0	0	0	0	0	0	0	0	0	0	0	0	0	0	1	1	1	0	0	0	0	0	1	0	0	0	0	2	1	0	0	0	0	0	0	0	0	0	0	1	0	2	1	0	1	0
K01281	Unclassified, K01281	NA	0	0	0	0	0	0	0	0	0	0	0	0	0	0	0	0	0	0	0	0	0	0	0	0	0	0	0	0	0	0	0	0	0	0	0	0	0	0	0	0	0	0	0	0	1	0	0
K01284	Unclassified, K01284	NA	0	0	0	0	0	0	0	0	0	0	0	0	0	0	0	0	0	0	0	1	0	0	0	0	0	0	0	0	0	0	0	0	0	0	0	0	4	3	0	0	0	0	2	2	0	0	0
K01295	Unclassified, K01295	NA	0	0	0	4	6	3	2	1	0	0	0	0	0	1	2	0	0	1	0	0	0	0	1	0	0	0	0	0	0	0	1	0	0	0	3	5	0	0	0	0	0	0	0	0	0	0	0
K01299	Unclassified, K01299	NA	1	0	1	0	0	0	0	0	0	0	0	0	0	0	0	0	0	0	0	0	0	0	0	0	0	0	0	0	0	0	0	0	0	0	0	0	0	0	0	0	0	0	0	0	0	0	0
K01304	Unclassified, K01304	NA	0	0	0	0	0	0	0	0	0	0	0	0	0	0	0	0	0	0	0	0	0	0	0	1	0	0	0	0	0	0	0	0	0	0	0	0	0	0	0	0	0	0	0	0	0	0	0
K01305	Unclassified, K01305	NA	6	5	4	0	1	1	1	1	1	2	6	1	4	0	5	1	1	6	2	4	3	1	1	0	6	3	6	0	0	0	0	1	0	1	5	1	1	1	4	0	0	0	0	0	0	0	3
K01341	Unclassified, K01341	NA	0	0	0	0	0	0	0	0	0	0	0	0	0	0	0	0	0	0	0	0	0	0	0	0	0	0	0	0	0	0	0	0	0	0	0	0	0	0	0	0	0	2	0	0	0	0	0
K01361	Unclassified, K01361	NA	0	0	0	0	0	0	0	0	0	0	0	0	0	0	0	0	0	0	0	0	0	0	0	0	0	0	1	0	0	0	1	0	2	0	0	0	0	0	0	0	0	0	0	0	0	0	0
K01362	Unclassified, K01362	NA	0	0	0	0	0	0	1	0	1	0	0	0	0	0	0	0	0	0	0	0	0	0	0	0	0	0	0	0	1	0	0	0	0	0	0	0	0	0	0	0	0	0	0	0	0	0	0
K01372	Unclassified, K01372	NA	13	8	9	3	2	15	1	5	2	4	6	3	5	4	3	3	4	2	9	8	10	4	3	2	2	1	3	2	4	5	0	1	3	0	1	4	7	1	3	3	3	1	2	1	2	3	3
K01400	Unclassified, K01400	NA	0	0	0	0	0	0	0	0	0	0	0	1	0	0	0	0	0	0	0	0	0	0	0	0	0	0	1	0	0	0	0	0	0	0	0	0	0	0	0	0	0	0	0	0	0	0	0
K01412	Unclassified, K01412	NA	0	0	0	0	0	0	0	0	0	0	0	0	0	0	0	0	0	0	0	0	0	0	0	0	0	0	0	0	0	0	0	0	0	0	0	0	0	0	0	0	0	1	0	0	0	0	0
K01417	Unclassified, K01417	NA	0	0	0	0	0	0	0	0	1	0	0	0	0	0	0	0	0	0	0	0	0	1	1	0	0	0	0	0	0	0	0	0	0	0	0	0	0	0	0	0	0	0	1	1	1	0	0
K01420	Unclassified, K01420	NA	0	0	1	0	0	0	0	0	0	0	0	0	0	0	0	0	0	0	0	0	0	0	0	0	0	0	0	0	0	0	0	0	0	0	0	0	0	0	0	0	0	0	0	0	0	0	0
K01421	Unclassified, K01421	NA	1	0	0	0	0	0	0	0	0	0	0	0	0	0	0	0	0	0	0	0	0	0	0	0	0	0	0	0	0	1	0	0	0	0	0	0	0	0	0	0	0	0	0	0	1	1	0
K01436	Unclassified, K01436	NA	1	1	1	1	0	2	0	0	1	1	1	3	0	0	0	0	1	1	4	1	3	1	0	2	3	0	3	1	3	2	0	0	1	1	1	1	1	0	0	0	3	4	0	0	0	1	0
K01447	Unclassified, K01447	NA	0	0	0	1	0	0	0	0	0	0	0	0	0	0	0	0	0	0	0	0	0	0	0	0	0	0	0	0	0	0	0	0	0	0	0	0	0	0	0	0	0	0	0	0	0	0	0
K01448	Unclassified, K01448	NA	0	1	0	0	0	0	0	0	0	1	0	0	0	0	0	0	0	0	4	2	6	0	0	0	0	0	0	0	0	0	0	0	0	0	0	0	0	0	0	0	2	0	0	0	0	0	0
K01449	Unclassified, K01449	NA	0	0	0	0	0	0	0	0	0	0	0	0	0	0	0	0	0	0	0	0	0	1	0	0	0	0	0	0	0	0	0	0	0	0	0	0	0	0	0	0	0	0	0	0	0	0	0
K01453	Unclassified, K01453	NA	0	0	0	0	0	0	0	0	0	0	0	0	0	0	0	0	0	0	0	0	0	0	0	0	0	0	0	0	0	0	0	0	0	0	0	0	0	0	0	0	0	1	1	0	0	0	0
K01463	Unclassified, K01463	NA	0	0	0	0	1	0	0	0	0	0	0	0	0	1	0	0	0	0	0	0	0	0	0	0	0	0	0	0	0	0	0	0	0	0	0	0	0	0	0	0	0	0	0	0	0	0	0
K01529	Unclassified, K01529	NA	0	0	0	0	0	0	0	0	0	0	1	0	0	0	0	0	0	0	0	0	0	0	0	0	1	0	0	0	0	0	0	0	0	0	0	0	0	0	0	0	0	1	0	0	0	0	0
K01533	Unclassified, K01533	NA	0	0	0	0	0	0	0	0	0	0	0	0	0	0	0	0	0	0	0	0	0	0	0	0	0	0	0	0	0	0	0	0	0	0	0	0	0	0	0	0	0	0	0	1	0	1	0
K01534	Unclassified, K01534	NA	0	0	1	1	1	1	1	0	0	0	0	0	0	0	0	0	0	0	0	0	0	0	1	1	0	1	0	0	1	0	0	1	0	0	0	0	0	0	0	0	1	1	1	0	0	1	0
K01537	Unclassified, K01537	NA	0	0	0	0	0	0	0	0	0	0	0	0	0	0	0	0	0	0	0	0	0	0	0	0	0	0	0	0	0	1	0	0	0	0	0	0	0	0	0	0	0	0	0	0	0	0	0
K01554	Unclassified, K01554	NA	0	0	0	0	0	0	0	0	0	0	0	0	0	0	0	0	0	0	0	1	0	0	0	0	0	0	0	0	0	0	0	0	0	0	0	0	0	0	0	0	0	0	0	0	0	0	0
K01567	Unclassified, K01567	NA	1	0	0	0	0	0	0	0	0	0	0	0	0	0	0	0	0	0	0	0	5	0	0	0	0	0	0	0	0	0	0	0	0	0	0	0	1	0	0	0	0	1	1	1	0	0	0
K01605	Unclassified, K01605	NA	0	0	0	0	0	0	0	0	0	0	0	0	0	0	0	0	0	0	0	0	0	0	0	0	0	0	0	0	0	0	0	0	0	0	0	0	0	0	0	0	0	1	0	0	0	0	0
K01636	Unclassified, K01636	NA	3	5	13	12	12	10	9	9	19	9	9	8	5	8	12	4	0	10	1	1	0	19	15	13	5	4	3	8	13	13	0	0	1	6	12	4	4	1	4	6	6	3	11	23	18	5	17
K01669	Unclassified, K01669	NA	0	0	0	0	0	0	0	0	0	0	0	0	0	0	0	0	0	0	0	0	0	0	0	0	0	0	0	0	0	0	0	0	0	0	0	0	0	0	0	0	0	0	0	1	0	0	0
K01795	Unclassified, K01795	NA	0	0	0	0	0	0	0	0	0	0	0	0	0	0	0	0	0	0	0	0	0	0	0	0	0	0	0	0	0	0	0	0	0	0	0	1	0	0	0	0	0	0	0	0	0	0	0
K01811	Unclassified, K01811	NA	2	3	3	1	2	2	2	3	1	2	1	1	2	2	2	0	0	2	2	2	2	1	3	2	0	1	3	1	0	2	1	4	4	0	1	0	2	0	1	1	1	1	1	3	4	2	2
K01854	Unclassified, K01854	NA	0	0	0	0	0	0	0	0	0	0	0	0	0	0	0	0	0	0	0	0	0	0	0	0	0	0	0	0	0	0	0	0	0	0	0	0	0	0	0	0	0	0	1	1	0	0	0
K01989	Unclassified, K01989	NA	13	1	7	5	4	1	3	3	4	9	12	11	3	3	5	3	2	4	4	8	3	0	5	3	7	3	0	4	2	0	0	0	0	1	1	2	0	0	1	3	0	0	6	1	0	0	0
K01990	Unclassified, K01990	NA	0	0	0	0	0	2	0	0	0	0	0	0	0	0	0	0	0	0	0	0	0	0	0	0	0	1	0	0	0	0	0	1	0	1	0	0	0	0	0	0	0	1	0	0	0	0	0
K01992	Unclassified, K01992	NA	0	0	0	0	0	0	0	0	0	0	0	0	1	2	0	2	5	2	0	0	1	0	0	0	0	0	0	0	0	0	0	0	0	0	0	0	0	1	0	0	3	0	0	0	0	0	0
K02003	Unclassified, K02003	NA	0	0	0	0	0	0	0	0	0	0	0	0	0	0	0	0	0	0	1	0	0	0	0	0	0	0	0	0	0	0	0	0	0	0	0	0	0	0	0	0	0	0	0	1	0	0	0
K02004	Unclassified, K02004	NA	1	0	1	0	0	1	1	1	3	1	0	0	1	1	2	4	16	4	1	1	1	1	1	2	0	0	0	1	5	1	0	0	1	0	0	0	1	0	0	0	1	1	0	0	0	2	2
K02005	Unclassified, K02005	NA	0	0	0	0	0	0	0	0	1	0	0	0	0	0	0	0	0	0	0	0	0	0	0	0	0	0	0	0	0	0	0	0	0	0	0	0	0	0	0	0	0	0	0	0	0	0	0
K02014	Unclassified, K02014	NA	0	0	0	0	0	0	0	0	0	0	0	0	0	0	0	0	0	0	0	0	1	0	1	0	0	0	0	3	3	1	1	2	2	0	0	0	1	1	0	0	0	0	0	0	0	0	0
K02025	Unclassified, K02025	NA	0	0	0	3	3	9	0	0	0	0	0	0	0	0	0	0	0	0	0	0	0	0	0	0	1	0	1	0	0	0	0	0	0	2	0	0	1	0	0	0	0	0	0	3	5	0	0
K02026	Unclassified, K02026	NA	0	0	0	0	0	0	0	0	0	1	0	0	0	0	0	0	0	0	0	0	0	0	0	0	0	0	0	0	0	0	0	0	0	0	0	0	0	0	0	0	0	0	0	0	0	0	0
K02027	Unclassified, K02027	NA	72	71	80	52	73	62	31	39	40	66	81	80	57	43	65	53	33	61	79	75	73	43	52	47	43	39	41	47	52	33	45	36	35	41	55	63	49	17	28	25	39	49	57	79	89	46	45
K02030	Unclassified, K02030	NA	1	0	0	1	0	0	1	0	0	1	2	0	1	0	0	0	0	0	1	0	0	0	0	0	0	0	1	0	2	0	0	0	0	0	0	0	0	0	0	0	0	0	1	0	0	1	0
K02031	Unclassified, K02031	NA	0	0	0	0	0	0	0	0	0	0	0	0	0	0	0	0	0	0	1	0	0	0	0	0	0	0	0	0	0	0	0	0	0	0	0	0	0	0	0	0	0	0	0	0	0	0	0
K02032	Unclassified, K02032	NA	0	0	0	0	0	0	0	0	0	0	0	0	0	0	0	0	0	0	0	0	0	1	0	0	0	0	0	0	0	0	0	0	0	0	0	0	1	0	0	0	0	0	0	0	0	0	0
K02034	Unclassified, K02034	NA	0	0	0	0	0	0	0	0	0	0	0	0	0	0	0	0	0	0	0	0	0	0	0	0	0	0	0	0	0	0	0	1	0	0	0	0	0	0	0	0	0	0	0	0	0	0	0
K02035	Unclassified, K02035	NA	44	53	55	68	51	75	31	34	27	69	73	72	23	23	50	18	26	30	47	53	58	34	41	39	26	31	37	47	47	28	30	24	17	28	38	44	42	17	30	34	36	54	34	35	35	34	23
K02039	Unclassified, K02039	NA	0	0	1	0	0	0	0	0	0	0	0	0	0	0	0	0	0	1	0	1	0	0	0	0	1	0	0	1	0	0	0	1	0	0	0	0	0	0	0	0	0	0	0	0	0	0	0
K02051	Unclassified, K02051	NA	0	0	1	3	0	1	1	3	1	0	1	1	0	0	0	0	2	2	0	0	0	0	0	0	0	1	2	1	1	0	0	0	0	1	0	1	0	0	0	2	0	0	0	0	0	1	0
K02055	Unclassified, K02055	NA	0	0	0	0	1	0	0	0	0	0	2	0	0	0	0	0	0	0	0	0	0	0	0	0	0	0	0	0	0	2	0	0	0	0	0	0	0	0	0	0	0	0	0	0	0	0	0
K02057	Unclassified, K02057	NA	0	0	1	0	0	0	0	0	0	0	0	0	0	0	0	0	0	0	0	0	0	0	0	0	0	0	0	0	0	0	0	0	0	0	0	0	0	0	0	0	0	0	0	0	0	0	0
K02058	Unclassified, K02058	NA	16	17	20	25	35	15	13	7	19	19	19	19	13	26	15	25	20	22	22	18	22	16	16	17	11	7	5	18	24	16	13	9	5	18	16	21	9	5	8	18	9	17	30	32	25	14	16
K02074	Unclassified, K02074	NA	0	0	0	0	0	0	0	0	0	0	0	0	0	0	0	0	0	0	1	0	0	0	0	0	0	0	0	0	1	0	0	0	1	0	0	0	0	0	0	0	0	0	0	0	0	0	0
K02082	Unclassified, K02082	NA	0	0	0	0	0	0	0	0	0	0	0	0	0	0	0	0	0	0	0	0	0	0	1	8	0	0	0	0	1	2	0	0	0	1	2	1	0	0	0	0	0	0	4	0	1	0	0
K02103	Unclassified, K02103	NA	0	0	0	0	0	0	0	0	0	0	0	0	0	1	0	0	0	0	0	0	0	0	0	0	0	0	0	0	0	0	0	0	0	0	0	0	0	0	0	0	0	0	1	0	0	0	0
K02238	Unclassified, K02238	NA	0	0	0	0	0	0	0	0	0	0	0	0	0	0	0	0	0	0	0	0	0	0	0	0	0	0	0	0	0	0	0	0	0	0	0	0	1	0	0	0	0	0	0	0	0	1	1
K02242	Unclassified, K02242	NA	1	0	1	0	0	0	1	1	1	0	0	0	0	0	0	0	0	0	0	0	0	0	0	0	0	0	0	0	0	0	0	0	0	0	0	0	0	0	0	0	0	0	0	0	0	0	0
K02346	Unclassified, K02346	NA	0	0	1	0	0	0	0	1	0	0	0	0	0	0	1	0	0	0	0	1	0	0	0	0	1	0	0	0	0	0	0	0	0	0	0	0	0	0	0	0	0	0	0	0	0	0	0
K02355	Unclassified, K02355	NA	0	0	0	0	0	1	0	0	0	0	0	0	0	0	0	0	1	0	8	2	1	0	3	7	1	0	0	0	12	9	0	0	0	8	2	0	0	0	1	0	0	0	6	7	0	0	7
K02357	Unclassified, K02357	NA	0	1	0	0	0	0	0	0	0	0	0	0	0	0	0	0	0	0	0	0	0	0	0	0	0	0	0	0	0	0	0	0	0	0	0	0	0	0	0	0	0	0	1	0	0	0	1
K02381	Unclassified, K02381	NA	1	2	3	0	1	0	0	0	0	1	1	1	0	0	0	1	0	0	0	0	0	1	0	0	1	2	0	2	2	2	0	0	0	1	0	1	0	0	0	2	0	0	0	0	0	0	1
K02404	Unclassified, K02404	NA	0	0	0	0	0	1	0	0	0	0	0	0	0	0	0	0	0	0	0	0	0	0	0	0	0	0	0	0	0	0	0	0	0	0	0	0	0	0	0	0	1	0	0	0	0	0	0
K02426	Unclassified, K02426	NA	0	0	0	0	0	0	0	0	0	0	0	1	0	0	0	0	0	0	0	0	0	0	0	0	0	0	0	0	0	0	0	0	0	0	0	0	0	0	0	0	0	0	0	0	0	0	0
K02431	Unclassified, K02431	NA	0	2	0	0	0	1	0	0	0	1	0	0	0	1	2	0	2	0	4	1	3	2	0	0	0	0	0	0	1	1	1	0	1	0	0	2	0	0	0	0	0	0	0	1	1	0	0
K02440	Unclassified, K02440	NA	1	1	2	1	1	1	0	1	1	2	1	2	1	0	1	2	0	0	1	1	1	1	1	1	0	1	2	1	1	1	2	1	1	1	1	1	1	1	2	0	0	0	1	1	1	1	1
K02469	Unclassified, K02469	NA	0	0	0	0	0	0	0	0	0	0	0	0	0	0	0	0	0	0	0	0	0	0	0	0	0	0	0	0	0	0	0	0	0	0	0	0	0	0	0	0	0	0	1	0	0	0	0
K02470	Unclassified, K02470	NA	1	0	1	0	0	0	0	0	0	0	0	0	0	0	0	0	1	0	0	0	0	0	0	0	0	0	0	0	0	0	0	0	0	0	0	0	0	0	0	0	0	0	0	0	0	0	0
K02481	Unclassified, K02481	NA	0	0	0	0	0	0	1	0	0	0	0	0	0	0	0	6	7	9	0	0	0	0	0	0	0	0	0	0	0	0	0	0	0	0	0	0	0	0	0	1	2	0	0	0	0	0	0
K02483	Unclassified, K02483	NA	0	0	0	0	0	1	0	0	1	0	0	0	0	0	0	0	0	0	0	0	0	0	0	0	0	0	0	0	0	0	0	0	0	0	0	0	0	0	0	0	0	0	0	0	0	0	0
K02503	Unclassified, K02503	NA	0	0	0	0	0	0	0	0	0	0	2	0	0	2	0	0	1	0	0	0	0	0	0	0	0	0	0	3	2	0	5	6	6	0	0	0	0	0	0	0	0	0	0	0	1	0	0
K02520	Unclassified, K02520	NA	0	0	0	0	0	0	0	0	0	0	0	0	0	0	0	0	0	0	0	0	0	0	0	0	0	0	0	0	0	0	0	0	0	0	0	0	0	0	0	0	0	0	0	0	1	0	0
K02528	Unclassified, K02528	NA	0	0	0	0	0	0	0	0	0	0	0	0	0	0	0	0	0	0	0	0	0	0	0	0	0	0	0	0	0	0	0	0	0	0	0	0	0	0	0	0	0	0	0	0	1	0	0
K02529	Unclassified, K02529	NA	0	0	0	0	0	0	0	0	0	0	0	0	0	0	0	0	1	1	0	1	1	0	0	1	0	0	0	0	0	0	0	0	0	0	0	1	0	0	0	0	0	0	0	0	0	0	0
K02538	Unclassified, K02538	NA	0	0	0	0	0	0	0	0	0	0	0	0	0	0	0	0	0	0	1	0	0	0	0	0	0	0	0	0	0	0	0	0	0	0	0	0	0	0	0	0	0	0	0	0	0	0	0
K02566	Unclassified, K02566	NA	1	0	0	0	0	1	0	0	0	0	0	0	0	0	0	0	0	0	0	0	0	0	0	0	0	0	0	0	0	0	0	0	0	0	0	0	0	0	0	0	0	0	0	0	0	0	0
K02600	Unclassified, K02600	NA	0	0	0	0	0	0	0	0	0	0	0	0	0	0	0	0	0	0	0	0	0	0	0	0	0	0	0	0	0	0	0	0	0	0	0	0	1	0	0	0	0	0	0	0	0	0	0
K02647	Unclassified, K02647	NA	0	0	0	0	0	0	0	0	0	0	0	0	0	0	0	0	0	0	0	0	0	0	0	0	0	0	0	0	0	0	0	0	0	0	0	0	0	0	0	0	0	1	0	0	0	0	0
K02653	Unclassified, K02653	NA	0	0	0	0	0	0	0	0	0	0	0	0	0	0	0	0	0	0	1	0	0	0	0	0	0	0	0	0	0	0	0	0	0	0	0	0	0	0	0	0	0	0	0	0	0	0	0
K02655	Unclassified, K02655	NA	0	0	0	0	0	0	0	0	0	0	0	0	0	0	0	0	0	0	0	0	0	0	1	0	0	0	0	0	0	0	0	0	0	0	0	0	0	0	0	0	0	0	0	0	0	0	0
K02665	Unclassified, K02665	NA	0	0	0	0	0	0	0	0	0	0	0	0	0	0	0	0	0	0	0	0	0	0	0	0	0	0	0	0	0	1	0	0	0	0	0	0	0	0	0	0	0	0	0	0	0	0	0
K02666	Unclassified, K02666	NA	0	1	0	0	0	0	0	0	0	0	0	0	0	0	0	0	0	0	0	0	0	0	0	0	0	0	0	0	0	0	0	0	0	0	0	0	0	0	0	0	0	0	0	0	0	0	0
K02837	Unclassified, K02837	NA	8	6	6	1	4	6	3	6	5	3	3	0	8	12	11	5	8	5	10	8	11	9	8	5	5	3	6	2	6	3	2	2	2	2	1	7	7	10	8	6	11	10	3	4	2	5	5
K03086	Unclassified, K03086	NA	0	0	0	0	0	0	0	0	0	0	0	0	0	0	0	0	0	0	0	1	0	0	0	0	0	0	0	0	0	0	0	0	0	0	0	0	0	0	0	0	0	0	0	0	0	0	0
K03088	Unclassified, K03088	NA	0	0	0	0	0	0	0	0	0	1	0	0	0	0	0	0	0	0	0	0	0	0	0	0	0	0	0	0	0	0	0	0	0	0	0	0	0	0	0	0	0	0	0	0	0	0	0
K03090	Unclassified, K03090	NA	0	0	0	0	0	0	0	0	1	0	0	0	0	0	0	0	0	0	0	0	0	0	0	0	0	0	0	0	0	0	0	0	0	0	0	0	0	0	0	0	0	0	0	0	0	0	0
K03091	Unclassified, K03091	NA	0	0	0	0	0	0	0	0	0	0	0	0	0	0	0	0	0	0	0	0	0	0	0	0	0	0	0	0	0	0	0	0	0	0	0	0	0	0	0	0	0	1	0	0	0	0	0
K03168	Unclassified, K03168	NA	0	0	1	0	0	0	0	0	0	0	0	0	0	0	0	0	0	0	0	0	0	0	0	0	0	0	0	0	0	0	0	0	0	0	0	0	1	0	0	0	0	0	0	0	0	0	0
K03169	Unclassified, K03169	NA	0	0	0	1	0	0	0	0	0	0	0	0	0	0	0	0	0	0	0	0	0	0	0	0	0	0	0	0	1	0	0	0	0	0	0	0	0	0	0	0	0	0	0	0	0	0	0
K03212	Unclassified, K03212	NA	0	1	0	0	0	0	0	0	0	0	0	0	0	0	0	0	0	0	0	0	0	0	0	0	0	0	0	0	0	0	0	0	0	0	0	0	0	0	0	0	0	0	0	0	0	0	0
K03218	Unclassified, K03218	NA	0	0	0	0	0	1	0	0	0	0	0	0	0	0	0	0	0	0	0	0	0	1	1	0	0	0	0	0	1	0	0	0	0	0	0	0	0	0	0	0	0	0	0	0	0	0	0
K03287	Unclassified, K03287	NA	0	0	0	0	0	0	0	0	0	0	0	0	0	1	0	0	0	0	0	0	0	0	0	0	0	0	0	4	3	0	2	0	2	0	0	1	1	0	0	2	0	0	0	0	0	0	0
K03294	Unclassified, K03294	NA	0	0	0	0	0	0	0	0	0	0	0	0	0	0	0	0	0	0	0	0	0	0	0	0	0	0	0	0	0	0	0	0	1	0	0	0	0	0	0	0	0	0	0	0	0	0	0
K03296	Unclassified, K03296	NA	0	0	0	0	0	0	0	0	0	0	0	0	0	0	0	0	0	0	0	0	0	0	0	0	0	0	0	0	0	0	0	0	0	0	0	0	0	0	0	0	0	0	0	1	0	0	0
K03306	Unclassified, K03306	NA	0	0	0	0	0	0	0	0	0	0	0	0	0	0	0	0	0	0	0	0	0	0	0	0	0	0	0	0	1	0	0	0	0	0	0	0	0	0	0	0	0	0	0	0	0	0	0
K03307	Unclassified, K03307	NA	0	0	0	0	0	0	0	0	1	0	0	0	0	0	0	0	0	0	0	0	0	0	0	0	0	0	0	0	0	0	0	0	1	0	0	0	0	0	0	0	0	0	0	0	0	0	0
K03308	Unclassified, K03308	NA	0	0	0	0	0	0	0	0	0	1	0	1	0	1	1	0	0	0	0	0	0	0	0	0	0	0	0	0	0	0	0	0	0	0	0	0	0	0	0	0	0	0	0	0	0	0	0
K03309	Unclassified, K03309	NA	0	0	0	0	0	0	0	0	0	0	0	0	0	0	0	0	1	0	0	0	0	0	0	0	0	0	0	0	0	0	0	0	0	0	0	0	0	0	0	0	0	0	0	0	0	0	0
K03310	Unclassified, K03310	NA	0	0	0	0	0	0	0	1	0	0	0	0	0	0	0	0	0	0	0	0	2	0	0	0	0	0	0	0	1	1	0	0	0	0	0	0	0	0	0	0	0	0	0	1	1	0	1
K03316	Unclassified, K03316	NA	0	0	0	0	0	0	0	1	0	0	0	0	0	0	0	0	0	0	0	0	0	0	0	0	0	0	0	0	0	0	0	0	0	0	0	0	0	0	0	0	0	0	0	0	1	0	0
K03321	Unclassified, K03321	NA	1	0	1	0	1	0	0	1	2	1	1	1	1	1	0	0	1	0	1	2	1	0	0	0	1	1	2	0	0	1	0	0	0	0	0	1	1	1	1	1	1	1	1	0	1	1	2
K03387	Unclassified, K03387	NA	1	1	1	0	1	0	0	0	0	1	0	1	0	0	1	0	1	0	0	1	0	1	1	2	1	0	0	1	1	1	1	1	0	0	0	0	0	0	1	0	0	0	1	1	1	1	0
K03423	Unclassified, K03423	NA	0	0	0	0	0	0	0	0	0	0	0	0	0	0	0	0	0	0	0	0	0	0	0	0	0	0	0	0	0	0	0	0	0	0	0	0	0	0	0	0	0	0	0	0	1	0	0
K03427	Unclassified, K03427	NA	0	0	0	0	0	0	0	0	0	0	0	0	0	0	0	0	0	0	0	1	0	1	0	0	0	0	0	0	0	1	0	1	0	0	0	0	1	0	0	0	0	0	0	0	0	0	1
K03437	Unclassified, K03437	NA	0	0	0	0	0	0	0	0	0	0	0	0	0	0	0	0	1	0	0	0	0	0	0	0	0	1	0	0	0	0	0	0	0	0	0	0	0	0	0	0	0	0	0	0	0	0	0
K03439	Unclassified, K03439	NA	0	0	0	0	0	0	1	0	0	0	0	0	0	0	0	0	0	0	0	0	0	0	0	0	0	0	0	0	0	0	0	0	0	0	0	0	0	0	0	0	0	0	0	0	0	0	0
K03458	Unclassified, K03458	NA	0	1	1	0	0	0	0	0	0	0	0	0	0	0	0	0	1	0	0	1	0	0	0	1	0	0	0	0	0	0	0	0	0	0	0	0	0	0	0	0	0	0	0	0	0	0	0
K03466	Unclassified, K03466	NA	0	0	2	0	0	0	0	0	0	0	0	0	0	0	0	0	0	0	0	0	0	0	0	0	0	0	0	0	0	0	0	0	0	0	0	0	0	0	0	1	0	0	0	1	0	0	0
K03483	Unclassified, K03483	NA	0	0	0	0	0	0	0	0	0	0	0	0	0	0	0	0	0	0	0	0	0	1	1	0	0	0	0	0	0	0	0	0	0	0	0	0	0	0	0	0	0	0	0	0	0	0	0
K03495	Unclassified, K03495	NA	0	0	0	0	0	0	0	0	0	0	0	0	1	0	0	0	0	0	0	0	0	0	0	0	0	0	0	0	0	0	0	0	0	0	0	0	0	0	0	0	0	0	0	0	0	0	0
K03498	Unclassified, K03498	NA	0	0	0	0	0	0	0	1	0	0	0	0	0	0	0	0	0	0	0	0	0	0	0	0	0	0	0	0	0	0	0	0	0	0	0	0	0	0	0	0	0	0	0	0	0	0	0
K03499	Unclassified, K03499	NA	0	0	0	0	0	0	1	2	3	0	1	0	0	0	0	0	0	0	3	5	7	0	2	0	1	0	0	0	0	0	0	0	0	0	0	0	1	0	2	0	0	0	0	3	0	0	0
K03529	Unclassified, K03529	NA	0	0	0	0	0	0	0	0	0	0	0	0	0	0	0	0	0	0	0	0	1	0	0	0	0	0	0	0	0	0	0	0	0	0	0	0	0	0	0	0	0	0	0	0	0	0	0
K03546	Unclassified, K03546	NA	1	1	2	0	1	3	0	5	0	4	5	1	5	10	8	1	6	4	9	1	3	0	0	0	0	0	1	2	5	3	4	3	5	0	1	2	9	20	14	2	3	2	1	4	1	3	2
K03547	Unclassified, K03547	NA	0	0	0	0	0	0	0	0	0	0	0	0	0	0	0	0	0	0	0	0	0	0	0	0	0	0	0	0	0	0	0	0	1	0	0	0	0	0	0	0	0	0	0	0	0	0	0
K03549	Unclassified, K03549	NA	0	0	0	0	0	0	1	0	0	0	0	0	0	0	0	0	0	0	0	0	0	0	0	1	0	0	0	0	0	0	0	0	0	0	0	0	0	0	0	0	0	0	0	0	0	0	0
K03559	Unclassified, K03559	NA	0	0	0	0	0	0	0	0	0	0	0	0	0	0	0	0	0	0	0	0	0	0	0	0	0	0	0	0	0	0	0	0	0	0	0	0	0	0	0	0	0	0	0	0	0	1	0
K03560	Unclassified, K03560	NA	0	0	0	0	0	0	0	0	0	0	0	0	0	0	0	0	0	0	0	0	0	0	0	0	0	0	0	0	0	0	0	0	0	0	0	0	0	0	0	0	0	0	0	0	0	1	0
K03568	Unclassified, K03568	NA	1	1	2	0	0	0	1	1	1	0	0	0	3	4	2	2	5	2	5	6	7	0	0	0	1	1	2	0	0	0	0	0	0	0	2	1	0	0	0	3	1	3	2	2	1	3	0
K03574	Unclassified, K03574	NA	0	0	0	0	0	0	0	1	1	0	0	0	0	0	0	2	0	0	0	0	0	0	0	0	0	0	0	0	0	1	0	0	0	0	0	0	0	0	0	0	1	1	0	0	0	0	0
K03585	Unclassified, K03585	NA	1	1	1	0	0	1	0	0	0	1	1	1	1	0	0	0	0	1	1	1	1	1	1	1	1	0	1	0	1	1	0	0	1	0	1	1	0	0	0	0	1	1	1	1	0	1	0
K03592	Unclassified, K03592	NA	5	2	5	0	2	1	1	2	7	0	0	0	5	6	6	3	6	2	9	8	11	1	0	0	5	1	3	0	0	1	0	0	1	0	1	3	1	1	0	7	7	6	6	5	3	4	2
K03593	Unclassified, K03593	NA	0	0	0	0	0	0	0	0	0	0	0	0	0	0	0	0	0	0	0	0	1	0	0	0	0	0	0	0	0	0	0	0	0	0	0	0	0	0	0	0	0	0	0	0	0	0	0
K03609	Unclassified, K03609	NA	0	0	0	0	0	0	0	0	0	0	0	0	0	0	0	0	0	0	0	0	1	0	0	0	0	0	0	0	0	0	0	0	0	0	0	0	0	0	0	0	0	0	0	0	0	0	0
K03612	Unclassified, K03612	NA	1	2	1	0	1	0	1	1	1	1	0	1	1	1	0	1	1	1	1	0	1	1	1	1	1	1	1	1	1	1	1	1	0	3	1	0	0	0	1	1	0	1	1	1	1	0	0
K03615	Unclassified, K03615	NA	2	1	2	1	3	2	0	0	2	2	2	2	1	0	7	0	0	1	2	3	2	1	0	0	0	1	2	2	3	2	1	0	0	0	0	0	2	0	2	0	0	0	0	2	4	2	3
K03616	Unclassified, K03616	NA	0	0	0	0	0	0	0	0	0	0	0	0	0	0	0	0	0	0	0	0	0	0	0	0	0	0	0	0	0	0	0	0	0	0	0	0	0	0	0	0	1	0	0	0	0	0	0
K03624	Unclassified, K03624	NA	0	0	0	0	0	0	0	0	0	0	0	0	0	0	0	0	0	0	0	0	0	0	0	0	0	0	0	0	0	0	0	0	1	0	0	0	0	0	0	0	0	0	0	0	0	0	0
K03630	Unclassified, K03630	NA	0	1	0	0	0	0	0	0	0	0	0	0	0	1	0	0	0	0	0	1	0	0	0	0	0	0	0	0	0	0	0	0	0	0	0	0	0	0	0	0	0	0	0	0	0	0	0
K03638	Unclassified, K03638	NA	0	0	0	0	0	0	0	0	0	0	0	0	0	0	0	0	0	0	0	0	0	0	0	0	0	0	1	0	0	0	0	0	0	0	0	0	0	0	0	0	0	0	0	0	0	0	0
K03664	Unclassified, K03664	NA	6	6	0	1	0	1	1	2	1	1	4	5	0	0	0	0	0	0	7	9	7	1	2	0	0	0	0	3	4	1	0	1	0	0	0	1	6	7	7	8	3	5	4	1	1	3	1
K03671	Unclassified, K03671	NA	5	3	3	1	2	2	1	1	1	2	4	2	2	1	2	2	3	1	2	1	1	1	2	3	1	1	1	3	2	4	2	3	1	1	1	2	1	1	2	1	1	1	1	2	2	1	1
K03683	Unclassified, K03683	NA	0	0	0	0	0	0	0	0	0	0	0	0	0	0	0	0	0	0	0	0	0	0	0	0	0	0	0	0	0	0	0	0	0	0	0	0	0	0	0	0	0	0	0	0	0	0	1
K03695	Unclassified, K03695	NA	7	7	6	1	5	6	3	5	7	2	4	3	5	3	3	0	0	0	5	5	5	4	3	2	4	5	6	0	0	0	0	0	0	0	2	1	4	12	12	5	4	5	0	0	0	8	5
K03696	Unclassified, K03696	NA	0	0	0	0	0	0	0	0	0	0	0	0	0	0	0	0	0	0	0	0	0	0	0	0	0	0	0	0	0	0	0	0	0	0	0	0	0	0	0	0	0	0	0	0	1	0	0
K03705	Unclassified, K03705	NA	0	0	0	0	0	0	0	1	0	0	0	0	0	0	0	0	0	0	0	0	0	0	0	0	0	0	0	0	0	0	0	0	0	0	0	0	0	0	0	0	0	0	0	0	0	0	0
K03709	Unclassified, K03709	NA	0	0	0	0	0	0	0	0	0	0	0	0	0	0	0	0	0	0	0	0	0	0	0	0	0	0	0	0	0	0	0	0	0	0	0	0	0	1	0	0	0	0	0	0	0	0	0
K03712	Unclassified, K03712	NA	0	0	0	0	0	0	0	0	0	1	0	0	0	0	0	0	0	0	0	0	0	0	0	0	0	0	0	0	0	0	0	0	0	0	0	0	0	0	0	0	0	0	0	0	0	0	0
K03724	Unclassified, K03724	NA	0	0	0	0	0	0	0	0	0	0	0	0	0	0	0	0	0	0	0	0	0	0	0	0	0	0	0	0	0	0	0	0	0	0	0	0	0	0	0	0	0	0	0	1	0	0	0
K03734	Unclassified, K03734	NA	0	0	0	0	0	0	0	0	0	0	0	0	0	0	0	0	0	0	0	0	0	0	0	0	0	0	0	0	0	0	0	0	0	0	0	0	1	0	0	0	0	0	0	0	0	0	0
K03742	Unclassified, K03742	NA	0	0	0	1	0	0	0	0	0	0	0	0	0	0	0	0	0	0	0	0	1	0	0	0	0	0	0	0	0	0	0	0	0	0	0	0	0	0	0	0	0	0	0	0	0	0	0
K03751	Unclassified, K03751	NA	0	0	0	1	1	0	0	0	0	0	0	0	0	0	0	0	0	0	0	0	0	0	0	0	0	0	0	0	0	0	0	1	0	0	1	0	0	0	0	0	0	0	0	0	1	0	0
K03767	Unclassified, K03767	NA	0	0	0	0	0	0	0	0	0	0	0	1	0	0	0	0	0	0	0	0	0	0	0	0	0	0	0	0	0	0	0	0	0	0	0	0	0	0	0	0	0	0	0	0	0	0	0
K03771	Unclassified, K03771	NA	0	0	0	0	0	0	0	0	0	0	0	0	0	0	0	0	0	0	0	0	0	0	0	0	0	0	0	0	0	0	0	0	0	0	1	0	0	0	0	0	0	1	0	0	0	0	0
K03797	Unclassified, K03797	NA	0	0	0	0	0	0	0	0	0	1	0	0	0	0	0	0	0	0	0	0	0	0	0	0	0	0	0	0	0	0	0	0	0	0	0	0	0	0	0	0	0	0	0	0	0	0	0
K03798	Unclassified, K03798	NA	0	0	0	0	1	1	0	0	0	0	0	0	0	0	0	0	0	0	0	0	0	0	0	0	0	0	0	0	0	0	0	0	0	0	0	0	0	0	0	0	0	0	0	0	0	0	0
K03833	Unclassified, K03833	NA	0	0	0	0	0	0	0	1	1	0	0	0	0	0	0	0	0	0	0	0	0	0	0	0	0	0	0	0	0	0	0	0	0	0	0	0	0	0	0	0	0	0	0	0	0	0	0
K03977	Unclassified, K03977	NA	0	0	0	0	0	0	0	0	0	0	0	0	0	0	0	0	0	0	0	0	0	0	0	0	0	0	0	0	0	0	0	0	0	0	0	0	0	0	0	0	0	0	0	0	0	1	0
K03979	Unclassified, K03979	NA	0	0	0	0	0	0	0	0	0	0	0	0	0	0	0	0	0	0	0	0	0	1	0	0	0	0	0	0	0	0	0	0	0	0	0	0	0	0	0	0	0	0	0	0	0	0	0
K04026	Unclassified, K04026	NA	0	0	0	0	0	0	0	0	0	0	0	0	0	0	0	0	0	0	0	0	0	0	0	0	0	0	0	0	0	0	0	0	0	0	0	0	0	1	0	0	0	0	0	0	0	0	0
K04027	Unclassified, K04027	NA	0	0	0	0	0	0	1	1	1	1	0	1	0	0	0	0	1	1	0	0	0	0	0	0	1	0	0	1	0	1	0	1	0	0	0	0	1	0	1	0	0	0	0	0	0	1	0
K04047	Unclassified, K04047	NA	0	1	0	1	0	0	0	0	0	0	0	0	0	0	0	0	0	0	0	0	0	0	0	0	0	0	0	0	0	0	0	0	0	0	0	0	0	0	0	0	0	0	0	0	0	0	0
K04075	Unclassified, K04075	NA	0	0	1	0	0	0	0	0	0	0	0	0	0	0	0	0	0	0	0	0	0	0	2	1	0	0	0	0	0	0	0	0	0	0	0	0	0	0	0	0	0	0	2	1	0	0	0
K04083	Unclassified, K04083	NA	0	0	0	0	0	0	0	0	0	0	0	0	0	0	0	0	0	0	0	0	0	0	0	0	0	0	0	0	0	0	0	0	0	0	1	0	0	0	0	0	0	0	0	0	0	0	0
K04094	Unclassified, K04094	NA	0	0	0	0	0	1	0	0	0	0	0	0	0	0	0	0	0	0	0	0	0	0	0	0	0	0	0	0	0	0	0	0	0	0	0	0	0	0	0	0	0	0	0	0	0	0	0
K04477	Unclassified, K04477	NA	0	0	0	0	0	0	0	0	0	0	0	0	0	0	0	0	0	0	0	0	0	0	0	0	0	0	0	0	0	0	0	1	0	0	0	0	0	0	0	0	0	0	0	0	0	0	0
K04759	Unclassified, K04759	NA	0	0	0	0	0	0	0	0	0	0	0	0	0	0	0	0	1	0	0	0	0	0	0	1	0	0	0	0	1	0	0	0	0	0	0	0	0	0	0	0	0	0	0	0	0	0	0
K04764	Unclassified, K04764	NA	0	0	0	0	0	0	0	0	0	0	0	0	0	0	0	0	0	0	0	0	0	0	0	0	0	0	0	0	0	0	0	0	1	0	0	0	0	0	0	0	0	0	0	0	0	0	0
K04773	Unclassified, K04773	NA	0	0	0	0	0	0	0	0	0	0	0	0	2	1	0	0	1	0	0	1	0	0	0	0	0	0	0	0	0	0	0	0	0	0	0	0	2	0	1	0	0	0	0	0	0	0	0
K05520	Unclassified, K05520	NA	1	1	1	0	1	2	0	0	0	0	1	1	0	0	0	0	1	1	0	0	0	1	1	2	0	0	0	1	1	1	1	1	1	0	0	0	0	0	2	0	1	1	1	1	1	1	0
K05541	Unclassified, K05541	NA	0	0	0	0	0	0	0	0	0	0	0	0	0	0	0	0	0	0	0	1	0	0	0	0	0	0	0	0	0	0	0	0	0	0	0	0	0	0	0	0	0	0	0	0	0	0	0
K05565	Unclassified, K05565	NA	0	0	0	0	0	0	0	0	0	0	0	0	0	0	0	0	0	0	1	0	1	0	1	0	0	0	0	0	0	0	0	0	0	0	0	0	0	0	0	0	0	0	0	0	0	0	0
K05839	Unclassified, K05839	NA	0	0	0	1	0	0	0	0	0	0	0	0	0	0	0	0	0	0	0	0	1	0	0	0	0	0	0	0	0	0	0	0	0	0	0	0	0	0	0	0	0	0	0	0	0	0	0
K05905	Unclassified, K05905	NA	0	0	0	0	0	0	0	0	0	0	0	0	0	0	0	0	0	1	0	0	0	0	0	0	0	0	0	0	0	0	0	0	0	0	0	0	0	0	0	0	0	0	0	0	0	0	0
K05970	Unclassified, K05970	NA	0	0	0	0	0	0	0	0	1	0	0	0	0	2	0	0	0	0	1	1	3	0	0	0	0	0	1	0	0	0	0	0	0	0	0	0	0	0	0	2	0	0	1	1	0	0	0
K05988	Unclassified, K05988	NA	0	0	0	0	0	0	0	0	0	0	0	0	1	0	0	0	0	0	0	0	0	0	0	0	0	0	0	0	0	0	0	0	0	0	0	0	0	0	0	0	0	0	0	0	0	0	0
K05989	Unclassified, K05989	NA	2	1	1	0	0	0	0	1	1	0	0	0	0	0	0	0	0	0	0	0	0	0	0	0	1	0	0	1	1	0	0	0	0	0	0	0	0	0	0	0	1	0	1	1	0	0	0
K06016	Unclassified, K06016	NA	0	1	0	0	0	1	1	1	1	1	1	0	0	0	1	0	0	2	4	1	0	2	1	1	2	0	0	2	1	0	0	0	0	1	1	1	0	0	0	2	2	0	1	1	1	1	0
K06113	Unclassified, K06113	NA	0	0	0	0	1	0	0	0	0	0	0	0	3	0	1	0	0	0	0	0	0	0	0	0	0	0	0	0	2	2	0	0	0	0	0	0	2	0	0	4	2	1	0	0	0	0	0
K06147	Unclassified, K06147	NA	8	6	12	1	0	0	1	6	11	5	9	5	6	12	9	1	4	2	30	7	28	1	1	1	0	0	5	1	1	0	2	3	4	5	7	17	3	13	13	2	2	1	4	10	3	6	3
K06158	Unclassified, K06158	NA	0	0	0	0	0	0	0	0	0	0	0	0	0	0	0	0	0	1	0	0	0	0	0	0	0	0	0	0	0	0	0	0	0	0	0	0	0	0	0	0	0	0	0	0	0	0	0
K06168	Unclassified, K06168	NA	2	2	0	1	1	0	0	0	0	0	0	0	0	0	0	0	0	0	0	1	0	0	0	0	1	1	0	0	0	0	0	0	0	0	0	0	0	0	0	1	0	0	0	0	0	0	0
K06173	Unclassified, K06173	NA	0	0	0	0	0	0	0	0	0	0	0	0	0	0	0	0	0	0	0	0	0	0	0	0	0	0	0	0	0	0	1	0	0	0	0	0	0	0	0	0	0	0	0	0	0	0	0
K06177	Unclassified, K06177	NA	0	0	0	0	0	0	0	0	0	0	0	0	0	0	0	0	0	0	0	0	0	0	0	0	0	0	0	0	0	0	0	0	0	1	0	0	0	0	0	0	0	0	0	0	0	0	0
K06195	Unclassified, K06195	NA	0	0	0	0	0	0	0	0	0	0	0	0	0	0	0	0	0	0	0	0	0	0	0	0	0	0	0	0	0	1	0	0	0	0	0	0	0	0	0	0	0	0	0	0	0	0	0
K06206	Unclassified, K06206	NA	0	0	0	0	0	1	0	0	0	0	0	0	0	0	0	0	0	0	0	0	0	0	0	0	0	0	0	0	0	0	0	0	0	0	0	0	0	0	0	0	0	0	0	0	0	0	0
K06213	Unclassified, K06213	NA	0	0	0	0	0	0	0	0	0	0	0	0	0	0	0	0	0	0	0	0	0	0	0	0	0	0	0	1	3	1	0	0	0	0	0	0	0	0	0	0	0	0	0	0	0	0	0
K06239	Unclassified, K06239	NA	0	0	0	0	0	0	0	0	0	1	0	0	0	0	0	0	0	0	0	0	0	0	0	0	0	0	0	0	0	0	0	0	0	0	0	0	0	0	0	0	0	0	0	0	0	0	0
K06287	Unclassified, K06287	NA	0	1	0	0	0	0	0	0	0	0	0	0	0	0	0	0	0	0	0	0	0	0	0	0	0	0	0	0	0	0	0	0	0	0	0	0	0	0	0	0	0	1	0	0	0	0	0
K06306	Unclassified, K06306	NA	0	0	0	0	0	0	0	0	0	0	0	0	0	0	0	0	0	0	0	0	0	0	0	0	0	0	0	0	0	0	0	0	1	0	0	0	0	0	0	0	0	0	0	0	0	0	0
K06320	Unclassified, K06320	NA	0	0	0	0	0	0	0	0	0	0	0	0	0	0	0	0	0	0	0	0	0	0	0	0	0	0	0	0	0	0	0	0	0	0	0	0	0	0	0	0	1	1	0	0	0	0	0
K06374	Unclassified, K06374	NA	0	0	0	0	0	0	0	0	0	0	0	0	0	0	0	0	0	0	0	0	0	0	0	0	0	0	0	0	0	0	0	1	0	0	0	0	0	0	0	0	0	0	0	0	0	0	0
K06381	Unclassified, K06381	NA	0	0	0	0	0	0	0	0	0	0	0	0	0	0	0	0	0	0	1	0	0	0	0	0	0	0	0	0	1	0	0	0	0	0	0	0	0	0	0	0	0	0	0	1	0	0	0
K06605	Unclassified, K06605	NA	0	0	0	0	0	0	0	1	0	0	0	0	0	0	0	0	0	0	0	0	0	0	0	0	0	0	0	0	0	0	0	0	1	0	0	0	0	0	0	0	0	0	0	0	0	0	0
K06877	Unclassified, K06877	NA	0	0	0	0	0	0	0	0	0	0	0	0	0	0	0	0	0	0	0	1	0	0	0	0	0	0	0	0	0	0	0	0	0	0	0	0	0	0	0	0	0	0	0	0	0	0	0
K06885	Unclassified, K06885	NA	1	0	1	0	0	0	0	0	0	0	0	0	0	0	0	0	0	0	0	0	0	0	0	0	0	0	0	0	0	0	0	0	0	0	0	0	0	0	0	0	0	0	0	0	0	0	0
K06889	Unclassified, K06889	NA	0	0	0	0	0	0	1	0	0	0	0	0	0	0	0	0	0	0	0	0	0	0	0	0	0	0	0	0	0	0	0	0	0	0	0	0	0	0	0	0	2	0	0	0	0	0	0
K06894	Unclassified, K06894	NA	0	1	0	0	0	1	0	0	0	0	0	0	0	0	0	0	0	0	0	0	0	0	0	0	0	0	1	0	0	0	0	0	0	0	0	0	0	0	0	0	0	0	0	0	0	0	0
K06901	Unclassified, K06901	NA	0	0	0	0	0	0	0	0	0	0	0	0	0	0	0	0	0	0	0	0	0	0	0	0	0	0	0	0	0	0	0	0	0	0	0	0	0	0	0	0	0	0	0	0	0	0	1
K06911	Unclassified, K06911	NA	0	0	0	0	0	0	0	0	0	0	0	0	0	0	0	0	0	0	0	0	0	0	0	0	0	0	0	0	0	0	0	0	0	0	0	0	0	0	0	0	1	0	0	0	0	0	0
K06929	Unclassified, K06929	NA	0	0	0	0	0	0	0	0	0	0	0	0	0	0	0	0	1	0	1	0	0	0	0	0	0	0	0	0	0	0	0	0	0	1	0	0	0	0	0	0	0	0	0	0	0	0	0
K06934	Unclassified, K06934	NA	0	0	0	0	0	0	0	0	0	0	0	0	0	0	1	0	0	0	1	0	0	0	0	0	0	0	0	0	0	1	0	0	0	0	0	0	0	0	0	0	2	0	0	1	1	0	0
K06941	Unclassified, K06941	NA	0	0	0	0	0	0	0	0	0	0	0	1	0	0	0	0	0	0	0	0	0	0	0	0	0	0	0	0	0	0	0	0	0	0	0	0	0	0	0	0	0	0	0	0	0	0	0
K06959	Unclassified, K06959	NA	1	1	0	0	0	0	0	0	0	0	0	0	0	0	0	0	0	0	0	0	0	0	1	1	0	0	0	0	0	0	0	0	0	0	0	0	1	0	0	0	0	0	2	0	2	0	1
K06967	Unclassified, K06967	NA	0	0	0	0	0	0	0	0	0	0	0	0	0	0	0	0	0	0	0	1	0	0	0	0	0	0	0	0	0	0	0	0	0	0	0	0	0	0	0	0	0	0	0	0	0	1	0
K06969	Unclassified, K06969	NA	0	0	0	0	0	0	0	0	0	0	0	0	0	0	0	0	0	1	0	0	0	0	0	0	0	0	0	0	0	0	0	0	0	1	0	0	0	0	0	0	0	0	0	0	0	0	0
K06972	Unclassified, K06972	NA	0	0	0	0	0	0	0	0	0	0	0	0	0	0	0	0	0	1	0	0	0	0	0	0	0	0	0	0	1	0	0	0	0	0	0	0	0	0	0	0	0	0	0	0	0	0	0
K06975	Unclassified, K06975	NA	0	0	0	0	0	0	0	0	0	1	6	0	0	0	0	0	4	3	0	0	0	0	0	0	0	0	0	0	2	1	1	2	2	0	0	0	0	2	2	0	0	0	2	1	0	1	0
K06979	Unclassified, K06979	NA	0	0	0	0	0	0	0	0	0	0	0	0	0	0	0	0	0	0	0	0	0	0	0	0	0	0	0	0	0	0	1	0	0	0	0	0	0	0	0	0	0	0	0	0	0	0	0
K07001	Unclassified, K07001	NA	0	0	0	0	0	0	0	0	0	0	0	0	0	0	0	0	0	0	0	0	0	0	1	0	0	0	0	0	0	0	0	0	0	0	0	0	0	0	0	0	0	0	0	0	0	0	0
K07003	Unclassified, K07003	NA	0	0	0	0	0	0	0	0	0	0	0	0	0	0	0	0	0	0	0	0	0	0	0	0	0	0	0	0	0	0	0	0	0	0	0	0	0	0	0	0	1	0	0	0	0	0	0
K07004	Unclassified, K07004	NA	0	0	0	0	0	0	0	0	0	3	3	3	0	0	0	1	4	2	0	0	0	0	0	0	0	0	2	1	1	0	0	0	0	0	0	0	0	0	0	3	1	1	0	0	0	0	0
K07005	Unclassified, K07005	NA	1	1	0	0	0	0	0	0	0	0	0	0	0	0	0	0	0	0	0	0	0	0	0	0	0	0	0	0	0	0	0	0	0	0	0	0	0	0	0	0	0	0	0	0	0	0	0
K07007	Unclassified, K07007	NA	0	0	0	0	0	0	0	0	0	0	0	0	0	0	0	0	0	0	0	0	0	0	0	0	0	0	0	0	1	0	0	0	0	0	0	0	0	0	0	0	1	0	0	0	0	0	0
K07010	Unclassified, K07010	NA	0	0	0	0	0	0	0	0	0	0	0	0	0	0	0	0	0	0	0	0	0	0	0	0	0	0	0	0	0	0	0	0	0	0	0	0	0	0	0	0	0	0	0	0	1	0	0
K07011	Unclassified, K07011	NA	0	0	0	0	0	0	0	0	0	0	0	0	2	0	0	0	0	0	0	0	0	0	0	0	0	0	0	0	0	0	0	0	0	0	0	0	0	0	0	0	0	0	0	0	0	0	0
K07012	Unclassified, K07012	NA	0	1	0	0	0	0	0	1	0	0	0	0	0	0	0	0	0	0	0	0	0	0	0	0	0	0	0	0	0	0	0	0	0	0	0	0	0	0	0	0	0	0	0	0	0	0	0
K07023	Unclassified, K07023	NA	0	0	0	0	0	0	0	0	0	0	0	0	1	0	0	0	0	0	0	0	0	0	0	0	0	0	0	0	0	0	0	0	0	0	0	0	0	0	0	0	0	0	0	0	0	0	0
K07024	Unclassified, K07024	NA	0	1	0	0	0	0	0	0	0	0	0	0	0	0	0	0	0	0	0	0	0	0	0	0	0	0	0	0	0	0	1	0	0	0	0	0	1	0	0	0	0	0	0	0	0	0	0
K07029	Unclassified, K07029	NA	0	0	0	0	0	0	0	0	0	0	0	0	1	0	0	0	0	0	0	0	0	0	0	0	0	0	0	0	0	0	0	0	0	0	0	0	0	0	0	0	0	0	0	0	0	0	0
K07042	Unclassified, K07042	NA	0	0	0	0	0	1	0	0	0	0	0	0	0	0	0	0	0	0	0	0	0	0	0	0	0	0	0	0	0	0	0	0	0	0	0	0	0	0	0	0	0	0	0	0	0	0	0
K07045	Unclassified, K07045	NA	0	0	0	0	0	0	0	0	1	0	1	0	1	1	1	0	0	0	0	0	0	0	0	0	0	0	0	0	0	0	0	0	0	0	0	0	0	0	0	0	0	0	0	0	0	0	0
K07047	Unclassified, K07047	NA	1	0	1	0	0	0	1	0	0	1	1	0	0	0	1	0	0	0	2	0	1	0	0	0	0	0	0	0	0	0	0	0	0	0	0	0	0	0	0	0	0	0	0	0	0	0	0
K07056	Unclassified, K07056	NA	0	1	0	0	0	0	0	0	0	0	0	0	0	1	0	0	0	0	0	0	0	1	1	0	0	0	0	0	0	0	2	1	2	0	0	0	0	1	1	0	0	0	1	1	1	1	0
K07058	Unclassified, K07058	NA	0	0	0	0	0	0	0	0	0	0	1	0	0	0	0	0	0	0	0	0	0	0	0	0	0	0	0	0	0	0	0	0	0	0	0	0	0	0	0	0	0	0	0	0	0	0	0
K07071	Unclassified, K07071	NA	0	0	0	0	0	0	0	0	0	0	2	0	0	0	0	0	0	0	0	0	0	0	0	0	0	0	0	0	0	0	0	0	0	0	0	0	0	0	0	0	0	0	0	0	0	0	0
K07080	Unclassified, K07080	NA	1	1	1	1	2	1	1	1	0	1	0	2	1	2	0	2	1	1	1	1	0	0	0	0	1	1	0	1	1	2	0	0	2	0	1	0	0	0	1	0	2	2	1	0	0	0	0
K07088	Unclassified, K07088	NA	0	0	0	0	0	1	0	0	0	0	0	0	0	0	0	0	0	1	0	0	0	0	0	0	0	0	0	0	0	0	0	0	0	0	0	0	0	0	0	0	0	0	0	0	0	0	0
K07098	Unclassified, K07098	NA	0	0	0	0	0	0	0	0	0	0	0	0	1	1	0	0	0	0	1	2	0	0	0	0	0	0	0	0	0	0	0	0	0	0	0	0	0	0	0	0	0	0	0	0	0	0	0
K07114	Unclassified, K07114	NA	0	0	0	0	0	0	0	0	0	0	0	0	0	0	0	0	0	0	0	0	0	1	0	0	0	0	0	0	1	0	0	0	0	0	0	0	0	1	0	0	0	0	0	0	0	0	0
K07137	Unclassified, K07137	NA	0	0	0	0	0	0	0	2	0	0	0	0	0	0	0	2	3	2	0	0	0	0	0	0	0	0	0	0	0	0	1	0	0	0	0	0	1	1	0	2	1	0	0	0	0	0	0
K07150	Unclassified, K07150	NA	1	0	0	0	1	0	0	0	0	0	0	0	0	0	0	0	0	0	0	0	0	0	0	0	0	0	0	0	0	0	0	0	0	0	0	0	0	0	0	0	0	0	0	0	0	0	0
K07214	Unclassified, K07214	NA	0	0	0	0	0	0	0	0	0	0	0	0	0	0	0	0	0	0	1	1	1	0	0	0	0	0	0	0	0	0	0	0	0	0	0	0	0	0	0	0	0	0	0	0	0	0	0
K07221	Unclassified, K07221	NA	0	0	0	0	0	0	0	0	0	0	0	0	0	0	0	0	4	1	0	0	0	0	0	0	0	0	0	0	0	0	0	2	1	0	0	0	0	0	0	0	0	0	0	0	0	0	0
K07231	Unclassified, K07231	NA	1	3	3	0	0	0	1	4	6	1	1	1	0	0	0	2	1	1	2	0	2	1	1	0	2	0	1	6	3	3	1	0	0	1	2	2	6	0	1	0	0	1	1	1	0	2	1
K07240	Unclassified, K07240	NA	0	0	0	0	0	0	0	0	0	1	0	0	0	0	0	0	0	0	0	0	0	0	0	0	0	0	0	0	0	0	0	0	0	0	0	0	0	0	0	0	0	0	0	0	0	0	0
K07263	Unclassified, K07263	NA	0	0	0	0	0	0	0	0	0	1	0	0	0	1	0	0	0	0	2	1	1	0	0	0	0	0	0	0	1	1	0	0	0	1	0	0	0	0	0	0	0	0	3	2	0	0	0
K07264	Unclassified, K07264	NA	0	1	0	0	0	0	0	0	0	0	1	0	0	0	0	0	0	0	0	0	0	0	0	0	0	0	0	0	0	0	0	0	0	0	0	0	0	0	0	0	0	0	0	0	0	0	0
K07273	Unclassified, K07273	NA	0	0	0	0	0	0	0	0	0	0	0	0	0	0	0	0	0	0	0	0	0	0	0	0	0	0	0	0	0	0	0	0	0	0	0	0	0	0	0	0	0	0	0	0	0	1	0
K07284	Unclassified, K07284	NA	0	0	0	0	0	0	0	0	0	0	0	0	0	0	0	0	0	0	0	0	0	0	0	0	0	0	0	0	0	0	0	0	0	0	0	0	0	0	0	0	0	1	0	0	0	0	0
K07308	Unclassified, K07308	NA	0	0	0	0	0	0	0	0	0	0	0	0	0	0	0	0	0	0	0	0	0	0	0	0	0	0	0	0	0	0	0	0	2	0	0	0	0	0	0	0	0	0	0	0	0	0	0
K07335	Unclassified, K07335	NA	15	14	19	15	11	11	15	15	14	22	18	24	9	9	11	14	19	19	21	22	27	13	8	13	7	6	16	9	9	8	12	17	16	7	13	20	12	10	12	15	16	12	20	21	10	13	9
K07344	Unclassified, K07344	NA	0	0	0	0	0	0	0	0	0	1	0	0	0	0	0	0	0	0	0	0	0	0	0	0	0	0	0	0	0	0	0	0	0	0	0	0	0	0	0	0	0	0	0	0	0	0	0
K07346	Unclassified, K07346	NA	0	0	0	0	0	0	0	0	1	0	0	0	0	0	0	0	0	0	0	0	0	0	0	0	0	0	0	0	0	0	0	0	0	0	0	0	0	0	0	0	0	0	0	1	0	0	0
K07386	Unclassified, K07386	NA	0	0	0	0	0	0	0	0	0	0	0	0	0	0	0	0	0	0	0	0	0	0	0	0	0	0	0	0	1	0	0	0	0	0	0	0	0	0	0	0	0	0	0	0	0	0	0
K07402	Unclassified, K07402	NA	0	0	0	0	0	0	0	0	0	0	0	0	1	0	0	0	0	0	0	0	0	0	0	0	0	0	0	0	0	0	0	0	0	0	0	0	0	0	0	0	0	0	0	0	0	0	0
K07444	Unclassified, K07444	NA	0	0	0	0	0	0	0	0	0	0	0	0	0	0	0	0	0	0	0	0	0	0	0	0	0	0	0	0	0	0	0	0	0	0	0	0	0	0	0	0	0	2	0	0	0	0	0
K07447	Unclassified, K07447	NA	0	0	0	0	0	0	0	0	0	0	0	1	0	0	0	0	0	0	0	0	0	0	0	0	0	0	0	0	0	1	0	0	0	0	0	0	0	0	0	0	0	0	0	0	0	0	0
K07461	Unclassified, K07461	NA	0	0	0	0	0	0	0	0	0	0	1	0	0	0	0	0	0	0	0	0	0	0	0	0	0	0	0	0	0	0	0	0	0	0	0	0	0	0	0	0	0	0	0	0	0	0	0
K07469	Unclassified, K07469	NA	10	16	13	6	8	15	12	14	23	14	17	9	10	8	19	9	8	27	20	14	13	10	8	7	7	3	7	7	6	5	9	8	11	2	4	11	7	16	11	9	14	3	16	21	18	12	11
K07486	Unclassified, K07486	NA	0	1	0	0	0	0	0	0	0	0	0	0	0	0	0	0	0	0	0	0	0	0	0	0	0	0	0	0	0	0	0	0	0	0	0	0	0	0	0	0	0	0	0	0	0	0	0
K07494	Unclassified, K07494	NA	0	0	0	0	0	0	0	0	0	0	0	0	0	0	0	0	0	0	0	0	0	0	0	0	0	0	0	0	0	0	0	0	0	0	0	0	0	0	0	0	0	0	0	0	0	0	0
K07496	Unclassified, K07496	NA	0	0	0	0	0	0	0	0	0	0	0	0	0	0	0	0	0	0	0	0	0	0	0	0	0	0	0	0	0	0	0	1	0	0	0	0	0	0	0	0	0	0	0	0	0	0	0
K07567	Unclassified, K07567	NA	1	1	0	0	0	0	0	0	0	1	0	0	0	1	0	3	4	4	1	1	0	0	0	0	0	0	0	0	0	0	0	0	0	0	0	0	0	0	0	0	2	0	1	0	0	1	0
K07576	Unclassified, K07576	NA	0	0	0	1	0	0	0	0	0	0	1	0	1	0	0	0	0	0	0	1	0	1	0	0	0	0	0	1	0	2	0	1	0	0	0	0	1	0	0	0	0	0	0	0	0	0	1
K07727	Unclassified, K07727	NA	1	0	0	0	0	0	0	0	0	0	0	0	0	0	0	0	0	0	0	0	0	0	0	0	0	0	0	0	0	0	0	0	0	0	0	0	0	0	0	0	0	0	0	0	0	0	0
K07749	Unclassified, K07749	NA	0	0	3	1	0	1	0	0	0	0	0	0	0	0	0	0	0	0	0	0	0	0	0	0	0	0	0	0	0	1	0	0	0	0	0	0	1	0	3	0	0	0	0	0	0	0	2
K07814	Unclassified, K07814	NA	0	0	0	0	0	0	0	0	0	1	0	0	0	0	0	0	0	0	0	0	0	0	0	0	0	0	0	0	0	0	0	0	0	0	0	0	0	0	0	0	0	0	0	0	0	0	0
K07979	Unclassified, K07979	NA	0	0	0	0	0	0	0	0	0	0	0	0	0	0	0	0	0	0	0	0	0	0	0	0	0	1	0	0	0	0	1	0	1	0	0	0	0	0	0	0	0	0	0	0	0	0	0
K08077	Unclassified, K08077	NA	0	0	0	0	0	0	0	0	0	0	0	0	0	0	0	0	0	0	0	0	0	0	0	0	0	0	0	0	0	0	0	0	0	0	0	0	0	0	0	0	0	1	0	0	0	0	1
K08659	Unclassified, K08659	NA	2	10	4	13	3	7	5	3	5	17	12	13	2	2	6	3	0	3	6	5	4	14	15	5	4	3	2	3	5	4	3	5	6	2	4	7	3	3	3	5	4	6	6	11	15	4	5
K08884	Unclassified, K08884	NA	0	0	0	0	0	0	0	0	0	0	0	0	0	0	0	0	0	0	0	0	1	0	0	0	0	0	0	0	0	0	0	0	0	0	1	0	0	0	0	0	0	0	0	0	0	0	0
K08973	Unclassified, K08973	NA	0	0	0	0	0	0	0	0	0	0	0	0	0	0	0	0	0	0	0	0	0	0	0	0	0	0	0	0	0	0	0	0	0	1	1	0	0	0	0	0	0	0	0	0	0	0	0
K09013	Unclassified, K09013	NA	0	0	0	0	0	0	0	0	0	0	0	0	0	0	0	0	0	0	0	0	0	0	0	0	0	0	0	0	0	1	0	0	0	0	0	0	0	0	0	0	0	0	0	0	0	0	0
K09015	Unclassified, K09015	NA	0	0	0	0	0	0	0	0	0	0	0	0	0	0	0	0	0	0	0	0	0	0	0	0	0	0	0	0	0	0	1	0	0	0	0	0	0	0	0	0	0	0	0	0	0	0	0
K09157	Unclassified, K09157	NA	31	18	33	19	14	21	18	25	31	29	25	25	26	16	29	18	19	20	25	30	21	9	26	22	28	21	16	20	19	14	9	13	22	17	25	27	16	14	23	13	20	24	22	22	11	12	11
K09469	Unclassified, K09469	NA	0	0	0	0	1	0	1	0	1	1	1	1	0	0	0	0	0	0	0	0	0	0	0	0	0	0	0	0	0	0	0	0	0	0	0	0	0	0	0	0	0	0	0	0	0	0	0
K09704	Unclassified, K09704	NA	1	0	0	0	1	0	0	0	0	0	0	0	0	0	0	0	3	1	1	1	5	0	0	0	0	0	0	0	0	0	1	0	0	0	0	0	0	0	0	0	0	0	0	0	0	0	0
K09952	Unclassified, K09952	NA	0	0	0	0	1	0	0	0	0	0	0	0	0	0	0	0	0	0	0	0	0	0	0	0	0	0	0	0	0	0	0	0	0	1	0	0	0	0	0	0	0	0	0	0	0	0	0
K09955	Unclassified, K09955	NA	0	0	1	1	0	0	0	0	0	0	1	0	0	0	0	0	0	0	0	0	0	0	0	0	0	0	0	0	0	0	0	0	0	1	0	0	0	0	0	0	0	0	0	1	1	0	0
K09963	Unclassified, K09963	NA	0	0	0	0	0	0	0	0	0	0	0	0	0	0	0	0	0	1	0	0	0	0	0	0	0	0	0	0	0	0	0	0	0	1	0	0	0	0	0	0	0	1	0	0	0	0	0
K10120	Unclassified, K10120	NA	0	0	1	0	1	0	0	0	1	0	0	0	0	0	0	1	1	1	0	1	1	0	0	0	1	1	1	0	0	0	0	0	0	0	2	2	0	0	0	0	0	0	2	1	1	0	0
K10254	Unclassified, K10254	NA	1	1	1	0	0	1	0	0	0	0	0	1	0	0	0	0	0	0	4	3	3	0	0	1	0	0	1	0	5	1	0	0	0	0	0	1	1	0	0	0	0	0	1	0	2	1	0
K10670	Unclassified, K10670	NA	0	0	0	0	0	0	0	0	0	0	0	0	0	0	0	0	0	0	1	1	0	2	1	5	0	0	0	0	1	0	0	0	0	0	2	3	0	0	0	0	0	0	0	2	1	0	0
K10672	Unclassified, K10672	NA	1	0	0	0	0	0	0	0	0	0	1	0	0	0	2	0	1	0	0	0	0	0	0	0	0	0	0	0	4	1	2	0	0	0	0	0	0	0	0	0	1	2	1	1	2	0	0
K10677	Unclassified, K10677	NA	0	0	0	0	0	0	1	1	1	0	1	0	1	0	3	0	0	2	0	0	0	0	0	0	1	0	0	0	0	0	0	0	0	0	1	2	0	0	0	0	0	1	0	0	1	0	0
K10819	Unclassified, K10819	NA	0	0	0	0	0	1	0	0	0	0	0	0	0	0	0	0	0	0	1	1	1	1	1	0	0	0	0	0	1	1	0	1	0	0	1	0	1	1	0	0	0	0	0	0	0	1	0
K10947	Unclassified, K10947	NA	0	0	0	0	0	0	0	0	0	0	0	0	0	0	0	0	1	0	0	0	0	0	0	0	0	0	0	0	0	0	0	0	0	0	0	0	0	0	0	0	0	0	0	0	0	0	0
K11055	Unclassified, K11055	NA	0	0	0	0	0	0	0	0	0	0	0	0	0	0	0	0	0	0	0	0	0	0	0	0	0	0	0	0	0	0	0	0	0	0	0	0	0	0	0	0	0	0	0	0	0	0	0
K11174	Unclassified, K11174	NA	3	6	4	0	6	4	1	5	3	6	6	4	2	1	7	1	6	4	5	2	5	11	9	7	4	1	6	2	4	11	2	6	5	2	6	5	2	2	5	0	5	4	9	6	3	5	3
K11201	Unclassified, K11201	NA	0	0	0	0	0	0	0	0	0	0	0	1	0	0	0	0	0	0	0	0	0	0	0	0	0	0	0	0	0	0	0	0	0	0	0	0	0	0	0	0	0	0	0	0	0	0	0
K11930	Unclassified, K11930	NA	0	0	0	0	0	0	0	0	0	0	0	0	0	0	0	0	0	0	0	0	0	0	0	0	0	0	0	0	0	0	0	0	0	0	0	0	1	0	0	0	0	0	0	0	0	0	0
K12510	Unclassified, K12510	NA	0	0	0	0	0	0	0	0	0	0	0	0	0	0	0	0	0	0	0	0	0	0	0	0	0	0	0	0	0	0	1	0	0	0	0	0	0	0	0	0	0	0	0	0	0	0	0
K12547	Unclassified, K12547	NA	1	0	0	0	0	0	1	1	0	1	0	0	0	0	0	0	0	0	0	0	0	0	0	0	0	0	0	0	0	0	0	0	0	0	1	0	0	0	0	0	0	0	0	0	0	0	0
K12680	Unclassified, K12680	NA	0	0	0	0	0	0	0	0	0	0	0	0	0	0	0	0	0	0	0	0	0	0	0	0	0	0	0	0	0	0	0	0	0	0	0	0	0	0	0	0	0	0	0	0	1	0	0
K12684	Unclassified, K12684	NA	0	0	0	0	0	0	0	0	0	0	0	0	0	0	0	0	0	0	0	0	0	0	0	0	0	0	0	0	0	0	1	0	0	0	0	0	0	0	0	0	0	0	0	0	0	1	2
K12685	Unclassified, K12685	NA	0	0	0	0	0	0	0	0	0	0	0	0	0	1	0	0	0	0	0	0	0	0	0	0	0	0	0	0	0	0	0	0	0	0	0	0	0	0	0	0	0	0	0	0	0	0	0
K12940	Unclassified, K12940	NA	0	1	1	0	1	0	0	0	0	1	0	2	0	0	0	1	1	1	3	3	6	0	0	0	0	0	0	3	1	2	0	0	0	0	0	0	0	0	0	0	2	3	0	0	1	4	0
K12941	Unclassified, K12941	NA	0	0	0	0	0	0	0	0	0	0	0	0	0	0	0	0	0	0	0	1	0	0	0	0	0	0	0	0	0	0	0	0	0	0	0	0	0	0	0	0	0	0	0	1	0	1	0
K12960	Unclassified, K12960	NA	0	0	0	0	1	0	0	0	0	0	0	0	0	0	0	0	0	0	0	0	0	0	0	0	0	0	0	0	0	0	0	0	0	0	0	0	0	0	0	0	0	0	0	1	0	0	0
K12990	Unclassified, K12990	NA	0	0	0	0	0	0	0	0	0	0	0	0	1	0	0	0	0	0	0	0	0	0	1	0	0	0	0	0	0	0	0	0	1	0	0	0	0	0	0	0	0	1	0	0	0	0	0
K13252	Unclassified, K13252	NA	4	3	4	0	1	0	0	0	0	0	0	0	0	0	0	0	0	0	0	1	0	0	0	0	0	0	0	0	0	0	0	0	0	0	0	0	0	0	0	0	0	0	0	0	0	0	0
K13277	Unclassified, K13277	NA	1	0	0	0	0	0	0	0	0	0	0	0	0	0	0	0	0	0	0	0	0	0	0	0	0	0	0	0	0	0	0	0	0	0	0	0	0	0	0	0	0	0	0	0	0	0	0
K13614	Unclassified, K13614	NA	0	0	0	0	0	0	0	0	0	1	1	0	0	0	0	0	0	0	0	0	0	0	0	0	0	0	0	0	0	0	0	0	0	0	0	0	0	0	0	0	0	0	0	0	0	0	0
K13633	Unclassified, K13633	NA	0	0	0	0	0	0	0	0	0	0	0	0	0	0	0	1	0	0	0	0	0	0	0	0	0	0	0	0	0	0	0	0	0	0	0	0	0	0	0	0	0	0	0	0	0	0	0
K13643	Unclassified, K13643	NA	0	0	0	0	0	0	0	0	0	0	0	0	0	0	0	0	0	0	0	0	0	0	0	0	0	0	0	0	0	0	0	0	0	0	0	0	0	0	0	0	0	0	0	0	0	1	0
K13688	Unclassified, K13688	NA	0	1	0	0	0	0	0	1	0	1	3	1	0	0	0	0	0	0	2	3	1	0	0	0	0	0	0	0	0	0	0	0	0	0	0	1	0	0	0	0	0	0	0	0	0	0	2
K13929	Unclassified, K13929	NA	0	0	0	0	0	0	0	0	0	0	0	0	0	0	0	0	0	0	0	0	1	0	0	0	0	0	0	0	0	0	2	5	2	0	0	0	0	0	0	0	0	0	0	0	0	0	0
K14059	Unclassified, K14059	NA	0	0	0	1	0	0	0	0	0	0	0	0	0	0	0	0	0	0	0	0	0	0	0	0	0	0	0	0	0	0	0	0	0	0	0	0	0	0	0	0	0	0	0	0	0	0	0
Not assigned	NA	NA	569	525	570	299	463	523	249	516	533	576	713	600	463	430	608	277	480	431	702	635	712	421	531	468	331	185	369	353	503	328	361	314	439	188	322	515	549	440	452	430	626	554	510	528	486	547	428
[truncated: 1 more columns]
