# Supplementary material for: Faecal Metaproteomic Analysis Reveals a Personalized and Stable Functional Microbiome and Limited Effects of a Probiotic Intervention in Adults
Source: PLoS One. 2016 Apr 12;11(4):e0153294. doi: 10.1371/journal.pone.0153294 (PMC4829149; doi:10.1371/journal.pone.0153294)
Supplement: S8 Table — (XLSX) [file pone.0153294.s012.xlsx]

## Sheet: Human top 73 KOs %
KO - description	104-1	104-2	104-3	106-1	106-2	106-3	107-1	107-2	107-3	112-1	112-2	112-3	116-1	116-2	116-3	119-1	119-2	119-3	122-1	122-2	122-3	124-1	124-2	124-3	127-1	127-2	127-3	130-1	130-2	130-3	135-1	135-2	135-3	137-1	137-2	137-3	147-1	147-2	147-3	155-1	155-2	155-3	162-1	162-2	162-3	163-1	163-2	163-3	Average
K01176 - alpha-amylase [EC:3.2.1.1]	28.8288	24.7619	10.6061	16.4179	49.345	36.272	15.1724	8.48485	10.5263	3.50877	4.97925	4.41176	3.33333	12.8342	3.73444	2.20588	4.01606	14.7541	5.76369	26.7532	10.6061	10.7143	10.7477	8.22511	6.71141	16.8919	10.4575	7.14286	5.26316	6.20438	5.6213	6.32184	4.15094	4.03226	4.04858	4.61538	7.94979	15.2439	15.2941	24.2775	11.465	7.11297	8.7963	8.07175	9.49721	17.8947	14.8515	14.1304	11.7302
K03984 - alpha-1-antitrypsin	9.68468	7.93651	12.1212	4.47761	6.76856	8.31234	9.65517	6.06061	10.0478	14.0351	13.278	9.31373	13.3333	7.48663	13.278	12.5	16.8675	16.9399	10.0865	7.79221	10.6061	12.5	9.34579	8.65801	11.4094	6.75676	7.84314	12.605	11.2281	11.3139	13.3136	13.2184	10.9434	3.22581	9.31174	7.17949	7.94979	7.31707	9.41176	6.93642	14.0127	18.41	7.40741	11.2108	14.5251	3.15789	3.9604	2.17391	9.91473
K01077 - alkaline phosphatase [EC:3.1.3.1]	4.95495	6.34921	6.81818	7.46269	2.62009	4.03023	6.89655	4.24242	4.78469	9.64912	7.88382	5.88235	2.66667	5.34759	4.14938	7.35294	6.82731	5.46448	9.79827	5.19481	14.899	3.125	4.20561	4.329	6.04027	8.10811	3.92157	5.88235	4.21053	4.37956	7.39645	14.3678	8.67925	5.64516	4.04858	4.10256	7.94979	6.09756	4.31373	6.35838	3.18471	4.1841	2.77778	3.58744	2.23464	11.5789	8.91089	11.9565	6.14273
K06499 carcinoembryonic antigen-related cell adhesion molecule	3.15315	3.80952	5.30303	4.97512	3.05677	4.53401	3.44828	4.24242	1.91388	5.70175	4.56432	6.37255	8	6.41711	4.97925	2.20588	4.41767	1.0929	5.18732	4.15584	5.05051	7.14286	7.47664	8.22511	6.71141	8.78378	7.84314	5.04202	4.21053	3.64964	3.5503	4.5977	5.28302	6.45161	8.09717	5.64103	7.11297	5.4878	3.13725	6.35838	5.09554	5.02092	8.33333	5.8296	4.46927	9.47368	7.92079	10.8696	5.50826
K01345 - pancreatic endopeptidase E [EC:3.4.21.70]	3.6036	2.22222	4.16667	3.9801	3.05677	4.28212	2.75862	3.63636	4.78469	3.50877	4.14938	2.94118	2	2.13904	1.65975	2.94118	2.00803	1.63934	2.30548	2.5974	1.51515	4.91071	6.07477	4.329	2.68456	1.35135	2.61438	3.36134	3.15789	3.28467	4.43787	6.89655	6.41509	2.41935	4.8583	4.10256	2.09205	4.87805	5.09804	1.7341	3.18471	5.43933	1.38889	3.13901	4.46927	8.42105	4.9505	13.0435	3.76318
K13073 - polymeric immunoglobulin receptor	2.02703	1.90476	1.89394	3.48259	1.31004	2.01511	1.37931	0.606061	2.39234	2.63158	2.90456	3.92157	3.33333	3.20856	2.07469	0.735294	0.803213	1.63934	3.17003	2.85714	2.77778	3.57143	3.27103	8.65801	4.69799	4.05405	5.22876	2.10084	5.96491	4.0146	5.91716	2.29885	4.90566	10.4839	4.45344	3.07692	7.53138	1.21951	2.7451	2.89017	0	0.41841	5.09259	7.17489	4.46927	7.36842	12.8713	4.34783	3.66447
K06813 cadherin 23	2.02703	2.85714	3.0303	2.48756	1.96507	2.267	4.13793	4.24242	3.82775	3.07018	2.07469	3.92157	4.66667	1.06952	3.3195	6.61765	2.81124	6.01093	2.30548	1.55844	1.0101	4.46429	4.20561	3.0303	5.36913	3.37838	3.92157	2.94118	2.45614	4.0146	2.66272	6.89655	3.01887	2.41935	3.64372	3.58974	3.34728	6.70732	5.4902	4.04624	7.64331	3.76569	2.77778	3.13901	5.02793	3.15789	0	0	3.46652
K01278 - dipeptidyl-peptidase 4 [EC:3.4.14.5]	2.25225	4.12698	3.40909	4.47761	2.62009	2.77078	6.2069	4.24242	4.78469	4.38596	7.46888	4.41176	4.66667	3.20856	2.90456	5.14706	4.41767	4.37158	2.88184	2.07792	3.53535	1.33929	1.40187	0.865801	6.71141	3.37838	5.88235	4.20168	3.50877	2.91971	2.66272	1.14943	1.50943	1.6129	4.04858	4.61538	3.34728	0	0.392157	4.04624	6.36943	4.1841	4.62963	4.03587	3.91061	0	0	0	3.35608
K12047 - maltase-glucoamylase [EC:3.2.1.20 3.2.1.3]	2.7027	4.12698	3.40909	0.497512	1.96507	3.02267	2.06897	4.24242	2.87081	2.19298	2.07469	1.96078	3.33333	5.34759	7.05394	0.735294	1.60643	0.546448	1.72911	1.55844	1.76768	6.69643	6.54206	4.329	3.3557	2.02703	1.30719	4.20168	3.15789	2.91971	5.02959	4.5977	6.03774	0	0.404858	1.02564	3.34728	4.87805	3.52941	0.578035	10.828	6.27615	5.55556	7.17489	8.93855	0	0	1.08696	3.30496
K01301 N-acetylated-alpha-linked acidic dipeptidase	2.02703	2.85714	2.65152	1.99005	1.52838	1.00756	2.75862	4.84848	3.82775	3.07018	2.48963	2.94118	6	1.60428	3.3195	4.41176	4.01606	6.01093	4.03458	2.33766	3.0303	3.125	5.14019	3.4632	4.02685	4.72973	5.22876	2.94118	3.15789	2.55474	1.77515	3.44828	2.64151	3.22581	4.45344	5.12821	2.51046	6.09756	3.92157	0.578035	5.73248	2.51046	2.77778	4.03587	2.23464	0	0	0	3.17086
K12349 - neutral ceramidase [EC:3.5.1.23]	2.02703	1.90476	3.78788	2.98507	0.655022	1.76322	2.75862	3.63636	4.78469	2.63158	2.90456	3.43137	4	3.74332	2.90456	4.41176	2.81124	0	2.88184	2.07792	2.52525	2.23214	3.27103	2.5974	1.34228	2.7027	3.26797	1.68067	2.45614	2.18978	2.95858	3.44828	3.39623	0.806452	1.21457	2.5641	3.76569	6.09756	2.7451	1.7341	1.27389	1.67364	0.462963	0.896861	1.67598	5.26316	5.94059	7.6087	2.78943
K13912 - deleted in malignant brain tumors 1 protein	2.47748	1.26984	1.51515	1.99005	1.52838	1.25945	3.44828	1.81818	1.91388	2.63158	2.07469	2.45098	2	2.6738	2.48963	2.20588	1.60643	2.73224	1.72911	2.5974	1.26263	1.33929	1.86916	4.329	2.68456	2.02703	2.61438	2.94118	3.15789	2.91971	3.25444	2.87356	2.26415	5.64516	3.23887	3.07692	2.51046	2.43902	3.13725	2.89017	1.91083	2.51046	4.16667	3.13901	3.35196	5.26316	4.9505	6.52174	2.72295
K12354 - ectonucleotide pyrophosphatase/phosphodiesterase family member 7 [EC:3.1.4.12]	2.92793	2.22222	2.65152	1.99005	1.52838	2.01511	4.82759	4.24242	2.87081	1.75439	2.48963	2.94118	3.33333	0	2.48963	0	2.00803	1.0929	2.01729	2.07792	1.51515	4.01786	4.6729	3.4632	2.01342	2.7027	3.26797	2.52101	3.15789	3.64964	2.95858	4.5977	3.77358	3.22581	4.45344	4.61538	2.51046	3.65854	3.92157	0.578035	1.91083	2.09205	0.462963	2.24215	2.23464	1.05263	0.990099	0	2.53626
K11140 - aminopeptidase N [EC:3.4.11.2]	0	0.31746	0	4.47761	0.218341	0.251889	0.689655	0	0	0	0.414938	0	6	5.34759	6.22407	9.55882	6.82731	7.10383	5.18732	3.8961	3.78788	0	0.46729	0.865801	6.71141	3.37838	9.15033	0	0.701754	0.729927	0.591716	0	0.377358	5.64516	0	0.512821	4.1841	5.4878	6.27451	1.15607	2.54777	0	1.38889	0.44843	0.558659	0	4.9505	3.26087	2.49359
K08779 - carboxypeptidase A1 [EC:3.4.17.1]	1.8018	0.952381	2.27273	2.98507	1.52838	2.77078	3.44828	3.63636	3.34928	2.19298	2.07469	4.41176	2.66667	1.60428	3.73444	4.41176	4.41767	4.37158	3.7464	3.37662	0.757576	0.892857	1.40187	2.1645	2.01342	1.35135	1.30719	2.10084	1.40351	0.729927	0.591716	1.72414	1.13208	3.22581	2.83401	4.61538	0	1.21951	2.35294	2.89017	3.82166	4.1841	3.24074	0.44843	0.558659	1.05263	1.9802	3.26087	2.35438
K01395 - meprin A	2.25225	1.5873	0.757576	1.49254	1.0917	1.51134	2.75862	0.606061	2.87081	2.63158	2.07469	2.45098	0.666667	1.06952	0.414938	1.47059	0.803213	1.0929	0.864553	0.779221	0.505051	4.46429	6.54206	4.329	2.01342	0.675676	2.61438	0.840336	2.10526	1.09489	2.36686	1.14943	1.88679	2.41935	2.02429	1.53846	1.67364	1.21951	0.784314	1.15607	1.27389	0.83682	2.77778	4.03587	4.46927	3.15789	3.9604	2.17391	1.9445
K05027 - calcium-activated chloride channel family member 1	1.8018	1.5873	2.65152	0.497512	0.655022	1.25945	0	0	1.91388	1.31579	1.24481	2.45098	0.666667	1.60428	1.24481	0.735294	0.803213	1.0929	1.72911	3.63636	2.52525	2.23214	1.40187	4.329	1.34228	1.35135	2.61438	1.2605	5.26316	2.91971	2.07101	0	0.754717	6.45161	2.42915	2.5641	3.76569	1.21951	2.35294	0.578035	0	0	2.31481	2.69058	0.558659	4.21053	2.9703	3.26087	1.88173
K01291 - carboxypeptidase B [EC:3.4.17.2]	1.35135	0.952381	2.27273	2.48756	1.31004	2.01511	2.75862	3.0303	2.39234	3.50877	1.24481	3.43137	4.66667	2.13904	3.3195	0	1.60643	2.18579	4.32277	2.5974	1.26263	3.125	0.46729	2.1645	0.671141	2.02703	0	2.52101	1.75439	1.45985	0.591716	0.574713	2.26415	4.03226	3.23887	4.10256	1.25523	0.609756	3.13725	2.31214	0	2.09205	1.85185	0	0	0	0	1.08696	1.87907
K11142 - cytosol aminopeptidase [EC:3.4.11.1 3.4.11.5]	1.57658	1.5873	1.13636	0.497512	1.31004	1.25945	0.689655	2.42424	3.82775	2.63158	3.73444	1.96078	4.66667	3.74332	2.07469	4.41176	3.21285	2.18579	3.17003	2.5974	3.53535	1.33929	1.40187	0.865801	0.671141	1.35135	0.653595	2.10084	1.40351	5.47445	1.18343	1.72414	1.88679	0	1.61943	1.53846	0.83682	2.43902	0.392157	2.31214	2.54777	2.51046	0.925926	1.34529	0.558659	0	0	0	1.86075
K01203 - sucrase-isomaltase / oligo-1	0	1.90476	3.40909	2.48756	0.873362	1.76322	1.37931	8.48485	2.87081	3.07018	0.414938	3.43137	0.666667	0	2.48963	0	0.401606	0	2.01729	2.33766	2.77778	2.67857	0.934579	0.865801	2.68456	0.675676	0.653595	2.94118	1.40351	4.37956	1.47929	0.574713	0.754717	0.806452	8.50202	3.58974	1.67364	1.21951	1.17647	4.04624	0	1.25523	0	0	1.11732	0	0	0	1.75401
K13963 - serpin B	1.35135	2.85714	2.27273	2.48756	1.31004	0	0.689655	1.81818	1.91388	0.877193	2.07469	0.490196	2	2.13904	4.14938	2.94118	2.81124	3.27869	2.01729	1.2987	2.27273	1.33929	0.46729	1.2987	1.34228	1.35135	1.30719	1.2605	0.701754	2.55474	2.66272	2.29885	1.88679	0.806452	1.61943	2.5641	1.67364	0.609756	0.784314	1.15607	1.91083	2.09205	4.62963	3.58744	2.7933	0	0	0	1.74478
K01311 chymotrypsin C	1.12613	0.952381	1.89394	1.49254	1.0917	1.00756	1.37931	1.81818	1.43541	1.31579	1.24481	0.980392	0.666667	1.06952	1.24481	0	0.803213	0	0.864553	0.519481	1.0101	1.33929	2.80374	1.7316	2.01342	1.35135	1.96078	1.2605	1.40351	1.09489	1.77515	2.87356	2.64151	0.806452	2.02429	2.5641	1.25523	2.43902	2.35294	1.15607	1.27389	1.25523	1.85185	1.34529	2.23464	3.15789	2.9703	3.26087	1.54404
K08606 - meprin A	2.25225	1.5873	2.27273	1.99005	0.218341	1.76322	3.44828	0.606061	0.956938	3.94737	2.48963	2.94118	2	3.20856	1.24481	3.67647	2.40964	4.37158	0.864553	1.03896	0.757576	2.23214	2.80374	0.865801	2.68456	1.35135	2.61438	0	1.05263	0.364964	0	0	0	2.41935	1.21457	0.512821	0.83682	0.609756	0.784314	1.15607	0.636943	0	3.24074	1.79372	1.11732	0	0	0	1.50703
K05689 - cadherin 1	0.675676	0.952381	1.13636	2.48756	0.655022	0.755668	1.37931	1.81818	1.91388	1.75439	1.24481	0.980392	2.66667	3.20856	1.65975	2.20588	1.20482	1.63934	1.15274	0.779221	1.51515	0	0.934579	0.4329	2.01342	2.02703	2.61438	1.68067	1.05263	0.729927	1.47929	1.14943	1.88679	1.6129	1.21457	1.53846	2.09205	1.82927	1.56863	2.31214	3.18471	1.25523	1.85185	3.13901	2.7933	0	0	0	1.50373
K01128 Phosphoric-diester hydrolases	0.900901	1.5873	1.51515	1.49254	0.873362	0.755668	1.37931	2.42424	1.43541	1.31579	1.24481	1.47059	1.33333	1.60428	0.829876	2.20588	1.20482	1.0929	1.72911	1.03896	2.27273	1.78571	1.40187	1.2987	2.01342	1.35135	1.96078	2.10084	1.05263	1.09489	2.36686	0.574713	1.50943	2.41935	0.809717	1.53846	1.67364	1.82927	1.17647	1.15607	1.27389	1.67364	2.31481	1.34529	1.67598	2.10526	0.990099	1.08696	1.48515
K01262 Xaa-Pro aminopeptidase	2.7027	0.952381	2.65152	3.48259	0.655022	1.76322	0.689655	0	1.43541	0.438596	0.414938	1.47059	0.666667	2.6738	1.65975	3.67647	3.21285	0	1.72911	0.25974	1.0101	0.892857	0	0	1.34228	1.35135	1.30719	1.68067	3.85965	2.91971	0.295858	0	0	1.6129	0.404858	2.05128	2.51046	3.65854	1.96078	1.7341	0	0	0	0	0	5.26316	3.9604	2.17391	1.46927
K10955 - intestinal mucin-2	0.675676	0.952381	0.378788	0.995025	0.218341	0.251889	0.689655	1.81818	0.478469	1.75439	2.07469	1.47059	0.666667	2.13904	1.65975	1.47059	0.401606	0.546448	0.288184	1.03896	1.26263	0.446429	0	1.2987	0	4.05405	0.653595	1.2605	1.40351	0.729927	2.07101	0.574713	0.377358	4.83871	0.809717	0.512821	1.67364	0.609756	0	1.15607	0.636943	0	1.85185	2.69058	1.11732	1.05263	5.94059	4.34783	1.27792
K04437 - filamin	0.675676	1.5873	0.757576	0	0.655022	1.00756	3.44828	4.24242	1.91388	2.19298	2.07469	0.980392	0	1.60428	0.414938	0.735294	0.803213	0	2.59366	1.03896	1.76768	2.67857	2.33645	2.5974	0	0	0	1.68067	1.05263	2.91971	2.07101	1.14943	1.50943	0	2.42915	1.53846	0.83682	0.609756	3.13725	0	0	2.51046	1.85185	0	1.11732	0	0	0	1.26084
K01283 - peptidyl-dipeptidase A [EC:3.4.15.1]	1.12613	2.53968	2.27273	3.48259	1.52838	1.51134	2.06897	1.21212	0.478469	0.877193	0.829876	2.45098	3.33333	1.60428	2.07469	0.735294	1.60643	0.546448	0	0.779221	0.252525	0	0	0	0	1.35135	0	2.10084	3.85965	0.729927	0.591716	0	0	1.6129	0.404858	0	1.67364	0	1.17647	2.89017	0.636943	1.25523	0	0	0	0	0	0	1.03322
K01273 membrane dipeptidase	0.675676	0	0	0.497512	0.436681	0.503778	0.689655	0.606061	0.478469	0.438596	0.829876	0.980392	0.666667	1.06952	0.414938	1.47059	0.803213	0	1.44092	0.519481	1.0101	0.892857	0.934579	0.4329	0.671141	0.675676	0.653595	0.840336	0.701754	0.729927	1.77515	1.14943	1.50943	0.806452	1.21457	1.02564	0.41841	0.609756	0.392157	0.578035	0.636943	0.41841	1.85185	1.79372	3.91061	2.10526	0.990099	2.17391	0.904682
K01316 protease	1.8018	0.952381	0.757576	0.497512	0.873362	1.25945	2.06897	1.21212	2.39234	0.438596	0.829876	0.490196	0	1.06952	0.414938	2.20588	0.803213	2.73224	0.864553	0.519481	1.0101	0	0	0.4329	1.34228	0.675676	0.653595	0.420168	0.701754	0.364964	0.591716	0	0	1.6129	0.404858	0	0.83682	0.609756	0.784314	1.15607	1.91083	2.09205	0	0	0	0	0	0	0.787182
K01389 - neprilysin [EC:3.4.24.11]	1.35135	1.26984	2.27273	0	0	0.251889	0.689655	0	0.956938	0	1.24481	0	0	0.534759	0.829876	0.735294	1.60643	0	1.72911	1.03896	2.52525	0.446429	0.46729	0.4329	0	0	0	0.840336	1.05263	1.09489	2.07101	0.574713	0.754717	0	1.21457	4.10256	0.83682	0	1.56863	0	0	0.41841	0.925926	2.24215	1.67598	0	0	0	0.786601
K01312 - trypsin [EC:3.4.21.4]	0.45045	0.952381	1.51515	0.497512	0.436681	0.503778	0	1.81818	1.43541	1.31579	0.829876	1.47059	1.33333	1.06952	1.24481	0.735294	0.401606	1.63934	0.288184	0.25974	0.252525	0.446429	0.46729	0.4329	2.01342	1.35135	0	0.840336	1.05263	0.729927	0.887574	0.574713	1.13208	0	0	0	1.25523	0.609756	0.784314	0.578035	0.636943	0.41841	0.925926	0.44843	0.558659	1.05263	0	1.08696	0.765294
K10788 - eosinophil peroxidase [EC:1.11.1.7]	0.900901	0.634921	1.89394	0	0.218341	0	0	1.81818	0.956938	0.438596	0.829876	0	0	1.60428	1.65975	0	1.60643	0	0	0	0	2.23214	2.33645	1.2987	0	0	0	0.420168	1.05263	0.364964	1.18343	1.14943	0.754717	0	1.21457	2.5641	0	0	0	1.15607	0.636943	2.09205	0	0	0	0	0	0	0.646219
K06554 immunoglobulin lambda-like polypeptide 1	0.225225	0.31746	0	0	0.218341	0	0	0	0	2.19298	2.48963	1.96078	0	0	0.414938	0	1.20482	0.546448	2.01729	1.81818	2.27273	0.446429	0.46729	1.2987	0	1.35135	0	1.68067	1.75439	1.09489	1.18343	0	1.50943	0	0	0	0.83682	0	0	0	0	0.41841	0.925926	0.44843	0.558659	0	0.990099	0	0.638412
K10384 filaggrin	0.900901	0.634921	0	1.49254	0.436681	0	0.689655	0	0.478469	0.877193	1.24481	0	0	1.06952	0.414938	0.735294	0	0.546448	0	0.25974	0	1.33929	0.46729	0.4329	0	0.675676	1.30719	0.420168	0	0.364964	0.887574	0.574713	0.377358	0.806452	0	0	1.67364	0.609756	0.392157	1.15607	0	1.25523	0	1.34529	0.558659	3.15789	0	0	0.574654
K01194 - alpha	0.45045	0.952381	1.13636	0.497512	1.0917	1.25945	0	0	0	0.438596	0.414938	0	1.33333	0	1.24481	0	0.401606	0	0.864553	1.2987	1.0101	1.33929	0	0	0.671141	0	0.653595	0.840336	1.05263	0.364964	0.295858	0	0	0.806452	0.809717	1.53846	0.41841	0	0	0.578035	1.91083	0.83682	0	0	0	0	0	0	0.510647
K01271 Xaa-Pro dipeptidase	0.225225	0.634921	0.757576	0.995025	0	0	0.689655	0	0.478469	0	0.414938	0.490196	0.666667	0	0.414938	0	0.401606	0.546448	0.576369	0.25974	0.252525	0.446429	0.46729	0.4329	0.671141	0.675676	0.653595	0.420168	0.350877	0.364964	0.295858	0.574713	0.377358	1.6129	2.02429	1.53846	0.41841	0.609756	0.392157	0.578035	0.636943	0.41841	0.462963	0.44843	0	0	0	0	0.472417
K06811 cadherin 17	0.675676	0.952381	0.378788	0.497512	0.218341	0	0	0.606061	0.956938	0	0.829876	0.490196	0.666667	0.534759	0.414938	0	0	0	0	0.25974	0.505051	0	0	0	0.671141	0	0.653595	0.840336	0.701754	0.729927	1.18343	0.574713	0.377358	0	0.404858	0	0.83682	0	0.392157	0	0	0	1.85185	2.24215	2.23464	0	0	0	0.451701
K10789 - myeloperoxidase [EC:1.11.2.2]	0.225225	0	0	0.995025	0.436681	0.251889	0	1.21212	0	0	0	0	0	1.06952	0.414938	0	1.20482	0	0	0	0	0.892857	0	0.865801	0	0	0	0.420168	0.350877	0.364964	1.77515	1.72414	0.377358	0	0.809717	1.02564	0	0	0	1.7341	0	1.25523	0	0	0	0	0	0	0.36263
K08069 - pantetheine hydrolase [EC:3.5.1.92]	0	0	0	0	0.218341	0	0	0	0	0	0	1.47059	0.666667	1.06952	0.414938	2.20588	0.401606	0.546448	1.15274	0.519481	0.505051	0	0	0	0	0	1.30719	1.2605	1.40351	1.09489	0	0	0	0	0	0	0	0	0	0.578035	0	1.25523	0.462963	0.44843	0	0	0	0	0.353792
K01300 - carboxypeptidase B2 [EC:3.4.17.20]	0.225225	0	0.378788	0	0.218341	0.251889	0.689655	0.606061	0	0.438596	0.414938	0.980392	0	0	0.414938	0	0	0	0.576369	0.519481	0.252525	0.446429	0.46729	0.4329	0.671141	0.675676	0	0.420168	0.350877	0	0.295858	0	0.377358	0.806452	0.809717	1.02564	0.41841	0	0.392157	0.578035	0	0.41841	0.925926	0	0	0	0	1.08696	0.345137
K00134 - glyceraldehyde 3-phosphate dehydrogenase [EC:1.2.1.12]	0	0.31746	0	0	0.655022	0.755668	0	0	0	0.877193	1.24481	0.490196	0	0.534759	0.414938	0.735294	0.803213	0.546448	0	0	0	0	0.46729	0.4329	1.34228	0.675676	0	0.420168	0.701754	0.364964	0.295858	0	0	0	0	0	0	0	0	0.578035	0	0	0.462963	1.34529	0	0	0	0	0.301296
K01436 amidohydrolase	0	0.31746	0.378788	0	0.218341	0	0	0	0.478469	0.438596	0	0.490196	0	0	0	0	0.401606	0	0.288184	0	0	0.446429	0.46729	0.865801	0	0	0.653595	0.420168	0.701754	1.09489	0.295858	0	0.754717	0	0	0.512821	0	1.21951	0	0	0	1.25523	0	0	0.558659	0	0	0	0.255383
K12298 - bile salt-stimulated lipase [EC:3.1.1.3 3.1.1.13]	0.45045	0.31746	0	0	0	0	0	0.606061	0	0	0.414938	0.490196	0	0	0	0	0	0	0	0	0	0	0.46729	0	0	0	0	0.840336	1.05263	0.364964	0.295858	1.14943	0.377358	0	0	0	0.83682	0	0.392157	0	0.636943	0	0	0	0	1.05263	0.990099	0	0.223659
K09708 - angiotensin-converting enzyme 2 [EC:3.4.17.23]	0	0.634921	0	0	0.218341	0.503778	0	0	0	0	0	0	0	0	0.829876	0	0	0	0	0	0	0	0	0.4329	0	0	0	0.840336	0.701754	1.82482	0	0	0	0	0	0	0	0	0	0	0	0	1.85185	1.34529	1.11732	0	0	0	0.214608
K11141 - glutamyl aminopeptidase [EC:3.4.11.7]	0.225225	0.31746	0.378788	0	0.218341	0	0	0	0	0	0	0.490196	0	0	0	0	0	0	0	0	0	0	0.46729	0.4329	0.671141	0	0.653595	0.840336	0	0.364964	0.295858	0	0.377358	1.6129	0	0	0.41841	0	0	0	0	0	0.462963	0.44843	0.558659	0	0.990099	0	0.213019
K04525 serpin peptidase inhibitor	0.675676	0	0	0	0.218341	0	0	0	0	0	0.414938	0	0	0	0.414938	0.735294	2.00803	0	0.576369	0.25974	0.757576	0	0	0	0	0	0	0.420168	0.350877	0.364964	0.295858	0	0	0	0	0	0	0	0	0	0	1.67364	0.462963	0	0	0	0	0	0.200612
K06171 - nicastrin	0	0	0	0.497512	0	0	0	0	0	0	0	0.980392	0.666667	0.534759	0	0.735294	0.401606	0	0.288184	0.25974	0.505051	0	0	0	0	0.675676	0	0.420168	0.701754	0.729927	0	0	0.377358	0	0	0.512821	0	0	0	0	0	0	0.462963	0.44843	0	0	0	0	0.191631
K10352 - myosin heavy chain	0	0	0	0	0	0	0	0	0	0.877193	0	0	0	0	0	0	0	0	0	0	0	0	0	0	0	0	0	0	0	1.45985	0	0	6.79245	0	0	0	0	0	0	0	0	0	0	0	0	0	0	0	0.190198
K01346 - pancreatic elastase II [EC:3.4.21.71]	0.45045	0.31746	0.378788	0.995025	0	0	1.37931	0	0.956938	0.877193	0.829876	0	0	0	0	0	0	0	0	0	0	0	0	0	0	0	0	0	0	0	1.18343	1.72414	0	0	0	0	0	0	0	0	0	0	0	0	0	0	0	0	0.189429
K06751 - major histocompatibility complex	0.45045	0	0.378788	1.99005	0	0	0	1.21212	0	0.438596	0	0.490196	0	0	0	0	0	0	0	0	0	0	0	0	0	0.675676	0	0	0	0	0	0	0	1.6129	0	0	0	0	0	0	0	0.41841	0.925926	0	0	0	0	0	0.179023
K01325 - tissue kallikrein [EC:3.4.21.35]	0	0	0	0	0	0	0	0.606061	0	0.438596	0.414938	0.490196	0	0	0	0	0	0	0.288184	0.25974	0.252525	0	0	0	0	0	0	0	0	0	0.295858	1.14943	0.377358	0	0.404858	0	0.41841	0	0.392157	0.578035	0	0.41841	0.462963	0.44843	0.558659	0	0	0	0.171975
K01298 - carboxypeptidase A2 [EC:3.4.17.15]	0	0	0	0	0	0	0.689655	0.606061	0.478469	0.438596	0.414938	0.980392	0	0	0.829876	0	0	0	0.576369	0.519481	0	0	0	0	0	0	0	0	0	0	0	0	0	0	0.404858	0	0	0	0.392157	0	0	0	0	0	0	0	0	0	0.131893
K14073 - pancreatic triacylglycerol lipase [EC:3.1.1.3]	0.225225	0	0	0	0	0	0	0	0	0	0	0.490196	0	0	0	0	0	0	0	0	0	0	0	0	0	0	0	1.68067	0	0.729927	0	0	0.377358	0	0	0	0	0	0.392157	0	0	0	0.462963	0	0	0	0	0	0.0908021
K05658 - ATP-binding cassette	0	0	0	0	0	0	0	0	0	0	0	0	0	0	0	0	0	0	0	0	0	0	0	0.4329	0	0	0	0	0.350877	0	0	0	0	1.6129	0	0	0	0	0	0	0	0	0.462963	0	0	0	0.990099	0	0.080203
K14078 - solute carrier family 26 (chloride anion exchanger)	0	0	0	0	0	0	0	0	0	0	0	0	0	0	0	0	0	0	0	0	0	0	0	0.4329	0	0	0	0	0	0	0	0	0	0	0	0	0.41841	0	0	0	0	0	0.925926	0	0	0	1.9802	0	0.0782799
K06237 - collagen	0	0	0	0	0	0.251889	0	0	0.478469	0	0	0	0	0	0	0	0	0	0.288184	0	0.252525	0	0	0	0	0	0	0	0	0	0	0	0	0	0.809717	0.512821	0	0	0	0	0.636943	0.41841	0	0	0	0	0	0	0.0760199
K05030 - calcium-activated chloride channel family member 4	0	0	0	0	0	0	0	0	0	0	0	0	0	0	0	0	0	0	0	0.25974	0	0	0	0.865801	0	0	0	0	0.350877	0	0	0	0.377358	0.806452	0	0	0.41841	0	0	0	0	0	0	0	0	0	0	0	0.0641383
K06269 - protein phosphatase 1	0	0	0	0	0	0	0	0	0.478469	0	0	0	0	0	0	0	0	0	0.288184	0.519481	0.505051	0	0	0	0	0	0	0	0	0	0.295858	0	0.377358	0	0.404858	0	0	0	0	0	0	0	0	0	0	0	0	0	0.0597762
K00382 - dihydrolipoamide dehydrogenase [EC:1.8.1.4]	0.225225	0	0	0	0	0.251889	0	0	0	0	0	0	0	0	0	0	0	0	0	0	0	0	0	0	0	0	0	1.2605	0	0.729927	0.295858	0	0	0	0	0	0	0	0	0	0	0	0	0	0	0	0	0	0.0575709
K01047 - secretory phospholipase A2 [EC:3.1.1.4]	0.225225	0	0	0	0.218341	0.251889	0	0.606061	0.478469	0	0	0	0	0	0	0	0	0	0.576369	0	0	0	0	0	0	0	0	0	0	0	0	0	0	0	0.404858	0	0	0	0	0	0	0	0	0	0	0	0	0	0.0575252
K08848 receptor-interacting serine/threonine-protein kinase 4	0	0	0.378788	0.497512	0.655022	0.503778	0	0	0	0	0	0	0	0	0	0	0	0	0	0	0.252525	0	0.46729	0	0	0	0	0	0	0	0	0	0	0	0	0	0	0	0	0	0	0	0	0	0	0	0	0	0.0573941
K12472 - epidermal growth factor receptor substrate 15	0	0	0	0	0	0	0	0	0	0	0	0	0	0	0	0	0.803213	1.0929	0	0	0	0	0	0	0	0	0	0	0	0	0	0	0	0	0	0	0	0	0	0	0	0	0	0	0	0	0	0	0.0395023
K13823 - hemoglobin subunit beta	0	0	0	0	0	0	0	0	0	0.438596	0.829876	0	0	0	0	0	0	0	0	0	0	0	0	0	0	0	0	0	0	0	0	0	0.377358	0	0	0	0	0	0	0	0	0	0	0	0	0	0	0	0.0342881
K01134 - arylsulfatase A [EC:3.1.6.8]	0	0	0	0	0	0	0	0	0	0	0	0	0	0	0	0	0	0	0.576369	0	0.252525	0	0	0	0	0	0	0	0	0.364964	0.295858	0	0	0	0	0	0	0	0	0	0	0	0	0	0	0	0	0	0.0310357
K01229 - lactase-phlorizin hydrolase [EC:3.2.1.108 3.2.1.62]	0	1.26984	0	0	0.218341	0	0	0	0	0	0	0	0	0	0	0	0	0	0	0	0	0	0	0	0	0	0	0	0	0	0	0	0	0	0	0	0	0	0	0	0	0	0	0	0	0	0	0	0.0310038
K03910 - alpha-2-macroglobulin	0	0	0	0	0	0	0	0	0	0	0	0	0	0	0	0	0	0	0	0	0	0	0	0	0	0	0	0	0	0	0	0	0	0	0.404858	1.02564	0	0	0	0	0	0	0	0	0	0	0	0	0.0298021
K00933 - creatine kinase [EC:2.7.3.2]	0	0	0	0	0	0	0	0	0	0	0	0	0	0	0	0	0	0	0	0	0	0	0	0	0	0	0	0	0	0	0	0	0	0	0.404858	0	0	0	0.784314	0	0	0	0	0	0	0	0	0	0.0247744
K01046 - triacylglycerol lipase [EC:3.1.1.3]	0	0	0	0	0	0	0	0	0	0	0	0	0	0	0	0	0	0	0	0	0	0	0	0	0	0	0	0.840336	0	0	0	0	0	0	0	0	0	0	0	0	0	0	0	0	0	0	0	0	0.017507
K13822 - hemoglobin subunit alpha	0	0	0	0	0	0	0	0	0	0	0.829876	0	0	0	0	0	0	0	0	0	0	0	0	0	0	0	0	0	0	0	0	0	0	0	0	0	0	0	0	0	0	0	0	0	0	0	0	0	0.0172891
K12310 Di-N-acetylchitobiase	0	0	0	0	0	0	0	0	0	0	0	0	0	0	0	0	0	0	0.576369	0	0.252525	0	0	0	0	0	0	0	0	0	0	0	0	0	0	0	0	0	0	0	0	0	0	0	0	0	0	0	0.0172686
K01183 - chitinase [EC:3.2.1.14]	0	0	0	0	0.436681	0	0	0	0	0	0	0	0	0	0	0	0	0	0	0	0	0	0	0	0	0	0	0	0	0	0	0	0	0	0	0	0	0	0	0	0	0	0	0	0	0	0	0	0.00909753
[truncated: 2 more columns]

## Sheet: ALL human KOs MSMS
Function	104-1	104-2	104-3	106-1	106-2	106-3	107-1	107-2	107-3	112-1	112-2	112-3	116-1	116-2	116-3	119-1	119-2	119-3	122-1	122-2	122-3	124-1	124-2	124-3	127-1	127-2	127-3	130-1	130-2	130-3	135-1	135-2	135-3	137-1	137-2	137-3	147-1	147-2	147-3	155-1	155-2	155-3	162-1	162-2	162-3	163-1	163-2	163-3
Cellular Processes, Cell Communication, Tight junction, K10352 - myosin heavy chain	0	0	0	0	0	0	0	0	0	2	0	0	0	0	0	0	0	0	0	0	0	0	0	0	0	0	0	0	0	4	0	0	18	0	0	0	0	0	0	0	0	0	0	0	0	0	0	0
Cellular Processes, Cell Motility, Regulation of actin cytoskeleton, K05699 - actinin alpha	0	0	0	0	0	0	0	0	0	0	0	0	0	0	0	0	0	0	0	0	0	0	0	0	0	0	0	0	0	0	0	0	1	0	0	0	0	0	0	0	0	0	0	0	0	0	0	0
Cellular Processes, Transport and Catabolism, Endocytosis, K12472 - epidermal growth factor receptor substrate 15	0	0	0	0	0	0	0	0	0	0	0	0	0	0	0	0	2	2	0	0	0	0	0	0	0	0	0	0	0	0	0	0	0	0	0	0	0	0	0	0	0	0	0	0	0	0	0	0
Cellular Processes, Transport and Catabolism, Peroxisome, K04564 - superoxide dismutase	0	0	0	0	0	0	0	0	0	0	0	0	0	0	0	0	0	0	0	0	0	0	0	0	0	0	0	0	0	0	0	0	0	0	0	0	0	0	0	0	0	0	1	1	0	0	0	0
Cellular Processes, Transport and Catabolism, Phagosome, K10789 - myeloperoxidase [EC:1.11.2.2]	1	0	0	2	2	1	0	2	0	0	0	0	0	2	1	0	3	0	0	0	0	2	0	2	0	0	0	1	1	1	6	3	1	0	2	2	0	0	0	3	0	3	0	0	0	0	0	0
Cellular Processes, Transport and Catabolism, Regulation of autophagy, K08337 - autophagy-related protein 7	0	0	0	0	0	0	0	0	0	0	0	0	0	0	0	0	0	0	0	0	1	0	0	0	0	0	0	0	0	0	0	0	0	0	0	0	0	0	0	0	0	0	0	0	0	0	0	0
Environmental Information Processing, Membrane Transport, ABC transporters, K05658 - ATP-binding cassette	0	0	0	0	0	0	0	0	0	0	0	0	0	0	0	0	0	0	0	0	0	0	0	1	0	0	0	0	1	0	0	0	0	2	0	0	0	0	0	0	0	0	1	0	0	0	1	0
Environmental Information Processing, Signal Transduction, Calcium signaling pathway, K02183 - calmodulin	1	0	0	0	0	0	0	0	0	0	0	0	0	0	0	0	0	0	0	0	0	0	0	0	0	0	0	0	0	0	0	0	0	0	0	0	0	0	0	0	0	0	0	0	0	0	0	0
Environmental Information Processing, Signal Transduction, Hedgehog signaling pathway, K06231 - hedgehog interacting protein	0	0	0	0	0	0	0	0	0	0	0	0	0	0	0	0	0	0	0	0	0	0	0	0	0	0	0	0	0	1	0	0	0	0	0	0	0	0	0	0	0	0	0	0	0	0	0	0
Environmental Information Processing, Signal Transduction, MAPK signaling pathway, K04437 - filamin	3	5	2	0	3	4	5	7	4	5	5	2	0	3	1	1	2	0	9	4	7	6	5	6	0	0	0	4	3	8	7	2	4	0	6	3	2	1	8	0	0	6	4	0	2	0	0	0
Environmental Information Processing, Signal Transduction, MAPK signaling pathway, K04459 - dual specificity phosphatase [EC:3.1.3.16 3.1.3.48]	0	0	0	0	0	0	0	0	0	1	0	0	0	0	0	0	0	0	0	0	0	0	0	0	0	0	0	0	0	0	0	0	0	0	0	0	0	0	0	0	0	0	0	0	0	0	0	0
Environmental Information Processing, Signal Transduction, MAPK signaling pathway, K07210 - inhibitor of nuclear factor kappa-B kinase subunit gamma	0	0	0	0	0	0	0	0	0	0	0	0	0	0	0	0	0	0	0	0	0	0	0	0	0	0	0	0	0	0	0	0	0	0	0	1	0	0	0	0	0	0	0	0	0	1	0	0
Environmental Information Processing, Signal Transduction, Notch signaling pathway, K06171 - nicastrin	0	0	0	1	0	0	0	0	0	0	0	2	1	1	0	1	1	0	1	1	2	0	0	0	0	1	0	1	2	2	0	0	1	0	0	1	0	0	0	0	0	0	1	1	0	0	0	0
Environmental Information Processing, Signal Transduction, PI3K-Akt signaling pathway, K06236 - collagen	0	0	0	0	0	0	0	0	0	0	0	0	0	0	0	0	0	0	0	0	0	0	0	0	0	0	0	0	0	0	0	0	0	0	0	0	0	0	0	0	0	0	0	0	0	1	0	0
Environmental Information Processing, Signal Transduction, PI3K-Akt signaling pathway, K06237 - collagen	0	0	0	0	0	1	0	0	1	0	0	0	0	0	0	0	0	0	1	0	1	0	0	0	0	0	0	0	0	0	0	0	0	0	2	1	0	0	0	0	1	1	0	0	0	0	0	0
Environmental Information Processing, Signaling Molecules and Interaction, Cell adhesion molecules (CAMs), K05689 - cadherin 1	3	3	3	5	3	3	2	3	4	4	3	2	4	6	4	3	3	3	4	3	6	0	2	1	3	3	4	4	3	2	5	2	5	2	3	3	5	3	4	4	5	3	4	7	5	0	0	0
Environmental Information Processing, Signaling Molecules and Interaction, Cell adhesion molecules (CAMs), K06751 - major histocompatibility complex	2	0	1	4	0	0	0	2	0	1	0	1	0	0	0	0	0	0	0	0	0	0	0	0	0	1	0	0	0	0	0	0	0	2	0	0	0	0	0	0	0	1	2	0	0	0	0	0
Environmental Information Processing, Signaling Molecules and Interaction, Neuroactive ligand-receptor interaction, K01312 - trypsin [EC:3.4.21.4]	2	3	4	1	2	2	0	3	3	3	2	3	2	2	3	1	1	3	1	1	1	1	1	1	3	2	0	2	3	2	3	1	3	0	0	0	3	1	2	1	1	1	2	1	1	1	0	1
Genetic Information Processing, Folding, Protein processing in endoplasmic reticulum, K09485 - heat shock protein 110kDa	0	0	0	0	0	0	0	0	0	0	0	0	0	0	0	0	0	0	0	0	0	0	0	0	0	0	0	0	0	0	0	1	0	0	0	0	0	0	0	0	0	0	0	0	0	0	0	0
Genetic Information Processing, Folding, Protein processing in endoplasmic reticulum, K14020 - wolfamin	0	0	0	0	0	0	0	0	0	0	0	0	0	0	0	0	0	0	0	0	0	0	0	0	0	0	0	0	0	0	0	0	0	0	0	0	0	0	0	0	1	0	0	0	0	0	0	0
Genetic Information Processing, Replication and Repair, Homologous recombination, K10877 - DNA repair and recombination protein RAD54B [EC:3.6.4.-]	1	0	0	0	0	0	0	0	0	0	0	0	0	0	0	0	0	0	0	0	0	0	0	0	0	0	0	0	0	0	0	0	0	0	0	0	0	0	0	0	0	0	0	0	0	0	0	0
Genetic Information Processing, Translation, mRNA surveillance pathway, K06269 - protein phosphatase 1	0	0	0	0	0	0	0	0	1	0	0	0	0	0	0	0	0	0	1	2	2	0	0	0	0	0	0	0	0	0	1	0	1	0	1	0	0	0	0	0	0	0	0	0	0	0	0	0
Genetic Information Processing, Translation, Ribosome, K02981 - small subunit ribosomal protein S2e	0	0	0	0	0	0	0	0	0	0	0	0	0	0	0	0	0	0	0	1	0	0	0	0	0	0	0	0	0	0	0	0	0	0	0	0	0	0	0	0	0	0	0	0	0	0	0	0
Human Diseases, Cancers, Pathways in cancer, K10056 - junction plakoglobin	0	0	0	1	0	0	0	0	0	1	0	0	0	1	0	0	0	0	0	0	0	0	0	0	0	0	0	0	0	0	0	0	0	1	0	0	0	0	0	0	0	0	0	0	0	0	0	0
Human Diseases, Cardiovascular Diseases, Arrhythmogenic right ventricular cardiomyopathy (ARVC), K10381 - desmoplakin	0	0	1	1	0	0	1	0	0	1	0	1	0	0	0	0	0	0	0	0	0	0	0	0	0	0	0	0	0	0	0	0	0	1	0	0	0	0	0	0	0	0	0	0	0	0	0	0
Human Diseases, Immune Diseases, Asthma, K10788 - eosinophil peroxidase [EC:1.11.1.7]	4	2	5	0	1	0	0	3	2	1	2	0	0	3	4	0	4	0	0	0	0	5	5	3	0	0	0	1	3	1	4	2	2	0	3	5	0	0	0	2	1	5	0	0	0	0	0	0
Human Diseases, Infectious Diseases, Amoebiasis, K13963 - serpin B	6	9	6	5	6	0	1	3	4	2	5	1	3	4	10	4	7	6	7	5	9	3	1	3	2	2	2	3	2	7	9	4	5	1	4	5	4	1	2	2	3	5	10	8	5	0	0	0
Human Diseases, Infectious Diseases, Malaria, K13822 - hemoglobin subunit alpha	0	0	0	0	0	0	0	0	0	0	2	0	0	0	0	0	0	0	0	0	0	0	0	0	0	0	0	0	0	0	0	0	0	0	0	0	0	0	0	0	0	0	0	0	0	0	0	0
Human Diseases, Infectious Diseases, Malaria, K13823 - hemoglobin subunit beta	0	0	0	0	0	0	0	0	0	1	2	0	0	0	0	0	0	0	0	0	0	0	0	0	0	0	0	0	0	0	0	0	1	0	0	0	0	0	0	0	0	0	0	0	0	0	0	0
Human Diseases, Infectious Diseases, Staphylococcus aureus infection, K07596 - desmoglein 1	0	0	0	0	0	0	0	0	0	0	0	0	0	0	0	0	0	0	0	0	0	0	0	0	0	0	0	0	0	0	0	0	0	0	0	0	1	0	0	0	0	0	0	0	0	0	0	0
Human Diseases, Infectious Diseases, Vibrio cholerae infection, K10955 - intestinal mucin-2	3	3	1	2	1	1	1	3	1	4	5	3	1	4	4	2	1	1	1	4	5	1	0	3	0	6	1	3	4	2	7	1	1	6	2	1	4	1	0	2	1	0	4	6	2	1	6	4
Human Diseases, Neurodegenerative Diseases, Huntington's disease, K04638 - estrogen-related receptor beta like 1	0	0	0	0	0	0	0	0	0	0	0	0	0	0	0	0	0	0	0	0	0	0	0	0	0	0	1	0	0	0	0	0	0	0	0	0	0	0	0	0	0	0	0	0	0	0	0	0
Metabolism, Amino Acid Metabolism, Alanine, K00813 - aspartate aminotransferase [EC:2.6.1.1]	0	0	1	0	0	0	0	0	0	0	0	0	0	0	0	0	0	0	0	1	0	0	0	0	0	0	0	0	0	0	1	0	0	0	0	0	0	0	1	0	0	0	0	0	0	0	0	0
Metabolism, Amino Acid Metabolism, Arginine and proline metabolism, K00933 - creatine kinase [EC:2.7.3.2]	0	0	0	0	0	0	0	0	0	0	0	0	0	0	0	0	0	0	0	0	0	0	0	0	0	0	0	0	0	0	0	0	0	0	1	0	0	0	2	0	0	0	0	0	0	0	0	0
Metabolism, Amino Acid Metabolism, Arginine and proline metabolism, K11142 - cytosol aminopeptidase [EC:3.4.11.1 3.4.11.5]	7	5	3	1	6	5	1	4	8	6	9	4	7	7	5	6	8	4	11	10	14	3	3	2	1	2	1	5	4	15	4	3	5	0	4	3	2	4	1	4	4	6	2	3	1	0	0	0
Metabolism, Amino Acid Metabolism, Tryptophan metabolism, K00543 - acetylserotonin N-methyltransferase [EC:2.1.1.4]	0	0	0	0	0	0	0	0	0	0	0	0	0	0	0	0	0	0	0	0	0	0	0	0	0	0	0	0	0	0	0	0	1	0	0	0	0	0	0	0	0	0	0	0	0	0	0	0
Metabolism, Carbohydrate Metabolism, Amino sugar and nucleotide sugar metabolism, K01183 - chitinase [EC:3.2.1.14]	0	0	0	0	2	0	0	0	0	0	0	0	0	0	0	0	0	0	0	0	0	0	0	0	0	0	0	0	0	0	0	0	0	0	0	0	0	0	0	0	0	0	0	0	0	0	0	0
Metabolism, Carbohydrate Metabolism, Galactose metabolism, K01203 - sucrase-isomaltase / oligo-1	0	6	9	5	4	7	2	14	6	7	1	7	1	0	6	0	1	0	7	9	11	6	2	2	4	1	1	7	4	12	5	1	2	1	21	7	4	2	3	7	0	3	0	0	2	0	0	0
Metabolism, Carbohydrate Metabolism, Galactose metabolism, K01229 - lactase-phlorizin hydrolase [EC:3.2.1.108 3.2.1.62]	0	4	0	0	1	0	0	0	0	0	0	0	0	0	0	0	0	0	0	0	0	0	0	0	0	0	0	0	0	0	0	0	0	0	0	0	0	0	0	0	0	0	0	0	0	0	0	0
Metabolism, Carbohydrate Metabolism, Galactose metabolism, K12047 - maltase-glucoamylase [EC:3.2.1.20 3.2.1.3]	12	13	9	1	9	12	3	7	6	5	5	4	5	10	17	1	4	1	6	6	7	15	14	10	5	3	2	10	9	8	17	8	16	0	1	2	8	8	9	1	17	15	12	16	16	0	0	1
Metabolism, Carbohydrate Metabolism, Galactose metabolism, K12316 - lysosomal alpha-glucosidase [EC:3.2.1.20]	0	1	0	0	0	0	0	0	0	0	0	1	0	0	1	0	0	0	0	0	0	0	0	0	0	0	0	0	0	0	0	0	0	0	0	0	0	0	0	1	0	0	0	0	0	0	0	0
Metabolism, Carbohydrate Metabolism, Glycolysis / Gluconeogenesis, Human Diseases, Neurodegenerative Diseases, Alzheimer's disease, K00134 - glyceraldehyde 3-phosphate dehydrogenase [EC:1.2.1.12]	0	1	0	0	3	3	0	0	0	2	3	1	0	1	1	1	2	1	0	0	0	0	1	1	2	1	0	1	2	1	1	0	0	0	0	0	0	0	0	1	0	0	1	3	0	0	0	0
Metabolism, Carbohydrate Metabolism, Glycolysis / Gluconeogenesis, K00382 - dihydrolipoamide dehydrogenase [EC:1.8.1.4]	1	0	0	0	0	1	0	0	0	0	0	0	0	0	0	0	0	0	0	0	0	0	0	0	0	0	0	3	0	2	1	0	0	0	0	0	0	0	0	0	0	0	0	0	0	0	0	0
Metabolism, Carbohydrate Metabolism, Glycolysis / Gluconeogenesis, K01810 - glucose-6-phosphate isomerase [EC:5.3.1.9]	0	0	0	0	0	0	0	0	0	0	0	0	0	0	0	0	0	0	0	0	0	0	0	0	0	0	0	0	0	0	0	0	0	0	0	0	0	0	0	0	0	0	1	1	0	0	0	0
Metabolism, Carbohydrate Metabolism, Glyoxylate and dicarboxylate metabolism, K03781 - catalase [EC:1.11.1.6]	0	0	0	0	0	0	0	0	0	0	0	0	0	0	0	0	0	0	0	0	0	0	0	0	0	0	0	0	0	0	1	0	0	0	0	0	0	0	0	0	0	0	0	1	0	0	0	0
Metabolism, Carbohydrate Metabolism, Inositol phosphate metabolism, K01109 - inositol polyphosphate-4-phosphatase [EC:3.1.3.66]	0	0	0	0	0	0	0	0	0	0	0	0	0	0	0	0	0	0	1	0	0	0	0	0	0	0	0	0	0	0	0	0	0	0	0	0	0	0	0	0	0	0	0	0	0	0	0	0
Metabolism, Carbohydrate Metabolism, Pentose and glucuronate interconversions, K01195 - beta-glucuronidase [EC:3.2.1.31]	0	0	0	0	0	0	0	0	0	0	0	0	0	0	0	0	0	0	0	0	0	0	0	0	0	0	0	0	0	0	0	0	1	0	0	0	0	0	0	0	0	0	0	0	0	0	0	0
Metabolism, Carbohydrate Metabolism, Propanoate metabolism, K00249 - acyl-CoA dehydrogenase [EC:1.3.8.7]	0	0	0	0	0	0	0	0	0	0	0	0	0	0	0	0	0	0	0	0	0	0	0	0	0	0	0	1	1	1	0	0	0	0	0	0	0	0	0	0	0	0	0	0	0	0	0	0
Metabolism, Carbohydrate Metabolism, Starch and sucrose metabolism, K01176 - alpha-amylase [EC:3.2.1.1]	128	78	28	33	226	144	22	14	22	8	12	9	5	24	9	3	10	27	20	103	42	24	23	19	10	25	16	17	15	17	19	11	11	5	10	9	19	25	39	42	18	17	19	18	17	17	15	13
Metabolism, Carbohydrate Metabolism, Starch and sucrose metabolism, K01194 - alpha	2	3	3	1	5	5	0	0	0	1	1	0	2	0	3	0	1	0	3	5	4	3	0	0	1	0	1	2	3	1	1	0	0	1	2	3	1	0	0	1	3	2	0	0	0	0	0	0
Metabolism, Glycan Biosynthesis and Metabolism, Glycosaminoglycan degradation, K01132 - N-acetylgalactosamine-6-sulfatase [EC:3.1.6.4]	0	0	0	0	0	0	0	0	0	0	0	0	0	0	0	0	0	0	0	0	0	0	0	0	0	0	0	0	0	0	1	0	0	0	0	0	0	0	0	0	0	0	0	0	0	0	0	0
Metabolism, Glycan Biosynthesis and Metabolism, Glycosaminoglycan degradation, K01205 - alpha-N-acetylglucosaminidase [EC:3.2.1.50]	1	0	0	0	0	0	0	0	0	0	0	0	0	0	0	0	0	0	0	0	0	0	0	0	0	0	0	0	0	1	0	0	0	0	0	0	0	0	0	0	0	0	0	0	0	0	0	0
Metabolism, Glycan Biosynthesis and Metabolism, Glycosaminoglycan degradation, K01565 - N-sulfoglucosamine sulfohydrolase [EC:3.10.1.1]	0	1	1	0	0	0	0	0	0	1	1	0	0	0	0	0	0	0	0	0	1	0	0	0	0	0	0	0	0	0	1	0	1	0	0	0	0	0	0	0	0	0	0	0	0	0	0	0
Metabolism, Glycan Biosynthesis and Metabolism, Other glycan degradation, K01206 - alpha-L-fucosidase [EC:3.2.1.51]	0	0	0	0	0	0	0	0	0	0	0	0	0	0	0	0	0	0	0	0	0	0	0	0	0	0	0	1	0	1	0	0	0	0	0	0	0	0	0	0	0	0	0	0	0	0	0	0
Metabolism, Lipid Metabolism, Biosynthesis of unsaturated fatty acids, K07753 - peroxisomal trans-2-enoyl-CoA reductase [EC:1.3.1.38]	0	0	0	0	0	0	0	0	0	0	0	0	0	0	0	0	0	0	0	0	0	0	0	0	0	0	0	0	1	0	0	0	0	0	0	0	0	0	0	0	0	0	0	0	0	0	0	0
Metabolism, Lipid Metabolism, Glycerolipid metabolism, K01046 - triacylglycerol lipase [EC:3.1.1.3]	0	0	0	0	0	0	0	0	0	0	0	0	0	0	0	0	0	0	0	0	0	0	0	0	0	0	0	2	0	0	0	0	0	0	0	0	0	0	0	0	0	0	0	0	0	0	0	0
Metabolism, Lipid Metabolism, Glycerolipid metabolism, K14073 - pancreatic triacylglycerol lipase [EC:3.1.1.3]	1	0	0	0	0	0	0	0	0	0	0	1	0	0	0	0	0	0	0	0	0	0	0	0	0	0	0	4	0	2	0	0	1	0	0	0	0	0	1	0	0	0	1	0	0	0	0	0
Metabolism, Lipid Metabolism, Glycerophospholipid metabolism, K01047 - secretory phospholipase A2 [EC:3.1.1.4]	1	0	0	0	1	1	0	1	1	0	0	0	0	0	0	0	0	0	2	0	0	0	0	0	0	0	0	0	0	0	0	0	0	0	1	0	0	0	0	0	0	0	0	0	0	0	0	0
Metabolism, Lipid Metabolism, Sphingolipid metabolism, K01134 - arylsulfatase A [EC:3.1.6.8]	0	0	0	0	0	0	0	0	0	0	0	0	0	0	0	0	0	0	2	0	1	0	0	0	0	0	0	0	0	1	1	0	0	0	0	0	0	0	0	0	0	0	0	0	0	0	0	0
Metabolism, Lipid Metabolism, Sphingolipid metabolism, K12349 - neutral ceramidase [EC:3.5.1.23]	9	6	10	6	3	7	4	6	10	6	7	7	6	7	7	6	7	0	10	8	10	5	7	6	2	4	5	4	7	6	10	6	9	1	3	5	9	10	7	3	2	4	1	2	3	5	6	7
Metabolism, Lipid Metabolism, Sphingolipid metabolism, K12351 - sphingomyelin phosphodiesterase 2 [EC:3.1.4.12]	0	0	0	0	0	0	0	0	0	0	0	0	0	0	0	0	0	0	0	0	0	0	0	0	0	1	0	0	0	0	0	0	0	0	0	0	0	0	1	0	0	0	0	0	0	0	0	0
Metabolism, Lipid Metabolism, Sphingolipid metabolism, K12354 - ectonucleotide pyrophosphatase/phosphodiesterase family member 7 [EC:3.1.4.12]	13	7	7	4	7	8	7	7	6	4	6	6	5	0	6	0	5	2	7	8	6	9	10	8	3	4	5	6	9	10	10	8	10	4	11	9	6	6	10	1	3	5	1	5	4	1	1	0
Metabolism, Lipid Metabolism, Steroid biosynthesis, K12298 - bile salt-stimulated lipase [EC:3.1.1.3 3.1.1.13]	2	1	0	0	0	0	0	1	0	0	1	1	0	0	0	0	0	0	0	0	0	0	1	0	0	0	0	2	3	1	1	2	1	0	0	0	2	0	1	0	1	0	0	0	0	1	1	0
Metabolism, Metabolism of Cofactors and Vitamins, Folate biosynthesis, K01077 - alkaline phosphatase [EC:3.1.3.1]	22	20	18	15	12	16	10	7	10	22	19	12	4	10	10	10	17	10	34	20	59	7	9	10	9	12	6	14	12	12	25	25	23	7	10	8	19	10	11	11	5	10	6	8	4	11	9	11
Metabolism, Metabolism of Cofactors and Vitamins, Pantothenate and CoA biosynthesis, K08069 - pantetheine hydrolase [EC:3.5.1.92]	0	0	0	0	1	0	0	0	0	0	0	3	1	2	1	3	1	1	4	2	2	0	0	0	0	0	2	3	4	3	0	0	0	0	0	0	0	0	0	1	0	3	1	1	0	0	0	0
Metabolism, Metabolism of Other Amino Acids, Glutathione metabolism, K00383 - glutathione reductase (NADPH) [EC:1.8.1.7]	0	0	0	0	0	0	0	0	0	0	0	0	0	0	0	0	0	0	0	0	1	0	0	0	0	0	0	0	0	0	0	0	0	0	0	0	0	0	0	0	0	0	0	0	0	0	0	0
Metabolism, Metabolism of Other Amino Acids, Glutathione metabolism, K00799 - glutathione S-transferase [EC:2.5.1.18]	0	0	0	0	0	0	0	0	0	0	0	0	0	0	0	0	0	0	0	0	0	0	0	0	0	0	0	0	0	0	0	0	1	0	0	0	0	0	0	0	0	0	0	0	0	0	0	0
Metabolism, Metabolism of Other Amino Acids, Glutathione metabolism, K11140 - aminopeptidase N [EC:3.4.11.2]	0	1	0	9	1	1	1	0	0	0	1	0	9	10	15	13	17	13	18	15	15	0	1	2	10	5	14	0	2	2	2	0	1	7	0	1	10	9	16	2	4	0	3	1	1	0	5	3
Metabolism, Nucleotide Metabolism, Purine metabolism, K01081 - 5'-nucleotidase [EC:3.1.3.5]	0	0	0	0	0	0	0	0	0	0	0	0	0	0	0	0	0	0	0	0	0	0	0	0	0	0	0	0	0	0	0	0	0	0	0	0	0	0	0	0	0	0	0	0	0	0	1	0
Metabolism, Nucleotide Metabolism, Purine metabolism, K01488 - adenosine deaminase [EC:3.5.4.4]	0	0	0	0	0	0	0	0	0	0	0	0	0	1	1	0	0	0	0	0	0	0	0	0	0	0	0	0	0	0	0	0	1	0	0	0	0	0	0	0	0	0	0	0	0	0	0	0
Organismal Systems, Circulatory System, Cardiac muscle contraction, K10373 - tropomyosin 1	0	0	0	0	0	0	0	0	0	0	0	0	0	0	0	0	0	0	0	0	0	0	0	0	0	0	0	0	0	0	0	0	1	0	0	0	0	0	0	0	0	0	0	0	0	0	0	0
Organismal Systems, Circulatory System, Cardiac muscle contraction, K10374 - tropomyosin 2	0	0	0	0	0	0	0	0	0	0	0	0	0	0	0	0	0	0	0	0	0	0	0	0	0	0	0	0	0	0	0	0	1	0	0	0	0	0	0	0	0	0	0	0	0	0	0	0
Organismal Systems, Digestive System, Pancreatic secretion, K01291 - carboxypeptidase B [EC:3.4.17.2]	6	3	6	5	6	8	4	5	5	8	3	7	7	4	8	0	4	4	15	10	5	7	1	5	1	3	0	6	5	4	2	1	6	5	8	8	3	1	8	4	0	5	4	0	0	0	0	1
Organismal Systems, Digestive System, Pancreatic secretion, K01298 - carboxypeptidase A2 [EC:3.4.17.15]	0	0	0	0	0	0	1	1	1	1	1	2	0	0	2	0	0	0	2	2	0	0	0	0	0	0	0	0	0	0	0	0	0	0	1	0	0	0	1	0	0	0	0	0	0	0	0	0
Organismal Systems, Digestive System, Pancreatic secretion, K01345 - pancreatic endopeptidase E [EC:3.4.21.70]	16	7	11	8	14	17	4	6	10	8	10	6	3	4	4	4	5	3	8	10	6	11	13	10	4	2	4	8	9	9	15	12	17	3	12	8	5	8	13	3	5	13	3	7	8	8	5	12
Organismal Systems, Digestive System, Pancreatic secretion, K01346 - pancreatic elastase II [EC:3.4.21.71]	2	1	1	2	0	0	2	0	2	2	2	0	0	0	0	0	0	0	0	0	0	0	0	0	0	0	0	0	0	0	4	3	0	0	0	0	0	0	0	0	0	0	0	0	0	0	0	0
Organismal Systems, Digestive System, Pancreatic secretion, K05027 - calcium-activated chloride channel family member 1	8	5	7	1	3	5	0	0	4	3	3	5	1	3	3	1	2	2	6	14	10	5	3	10	2	2	4	3	15	8	7	0	2	8	6	5	9	2	6	1	0	0	5	6	1	4	3	3
Organismal Systems, Digestive System, Pancreatic secretion, K05030 - calcium-activated chloride channel family member 4	0	0	0	0	0	0	0	0	0	0	0	0	0	0	0	0	0	0	0	1	0	0	0	2	0	0	0	0	1	0	0	0	1	1	0	0	1	0	0	0	0	0	0	0	0	0	0	0
Organismal Systems, Digestive System, Pancreatic secretion, K08779 - carboxypeptidase A1 [EC:3.4.17.1]	8	3	6	6	7	11	5	6	7	5	5	9	4	3	9	6	11	8	13	13	3	2	3	5	3	2	2	5	4	2	2	3	3	4	7	9	0	2	6	5	6	10	7	1	1	1	2	3
Organismal Systems, Digestive System, Pancreatic secretion, K14078 - solute carrier family 26 (chloride anion exchanger)	0	0	0	0	0	0	0	0	0	0	0	0	0	0	0	0	0	0	0	0	0	0	0	1	0	0	0	0	0	0	0	0	0	0	0	0	1	0	0	0	0	0	2	0	0	0	2	0
Organismal Systems, Digestive System, Protein digestion and absorption, K01278 - dipeptidyl-peptidase 4 [EC:3.4.14.5]	10	13	9	9	12	11	9	7	10	10	18	9	7	6	7	7	11	8	10	8	14	3	3	2	10	5	9	10	10	8	9	2	4	2	10	9	8	0	1	7	10	10	10	9	7	0	0	0
Organismal Systems, Digestive System, Protein digestion and absorption, K01395 - meprin A	10	5	2	3	5	6	4	1	6	6	5	5	1	2	1	2	2	2	3	3	2	10	14	10	3	1	4	2	6	3	8	2	5	3	5	3	4	2	2	2	2	2	6	9	8	3	4	2
Organismal Systems, Digestive System, Protein digestion and absorption, K08606 - meprin A	10	5	6	4	1	7	5	1	2	9	6	6	3	6	3	5	6	8	3	4	3	5	6	2	4	2	4	0	3	1	0	0	0	3	3	1	2	1	2	2	1	0	7	4	2	0	0	0
Organismal Systems, Digestive System, Salivary secretion, K13908 - mucin-5B	0	0	0	0	0	0	0	0	0	0	0	1	0	0	0	0	1	0	0	0	1	0	0	0	0	0	0	0	0	0	0	0	0	0	1	0	0	0	0	0	0	0	0	0	0	0	0	0
Organismal Systems, Digestive System, Salivary secretion, K13912 - deleted in malignant brain tumors 1 protein	11	4	4	4	7	5	5	3	4	6	5	5	3	5	6	3	4	5	6	10	5	3	4	10	4	3	4	7	9	8	11	5	6	7	8	6	6	4	8	5	3	6	9	7	6	5	5	6
Organismal Systems, Digestive System, Salivary secretion, K13915 - lysozyme C [EC:3.2.1.17]	0	0	0	0	0	0	0	0	0	0	0	0	0	0	0	0	0	0	0	0	0	0	0	0	0	0	1	0	0	0	0	0	0	1	0	0	1	0	0	0	0	0	0	0	0	0	0	0
Organismal Systems, Endocrine System, Renin-angiotensin system, K01283 - peptidyl-dipeptidase A [EC:3.4.15.1]	5	8	6	7	7	6	3	2	1	2	2	5	5	3	5	1	4	1	0	3	1	0	0	0	0	2	0	5	11	2	2	0	0	2	1	0	4	0	3	5	1	3	0	0	0	0	0	0
Organismal Systems, Endocrine System, Renin-angiotensin system, K09708 - angiotensin-converting enzyme 2 [EC:3.4.17.23]	0	2	0	0	1	2	0	0	0	0	0	0	0	0	2	0	0	0	0	0	0	0	0	1	0	0	0	2	2	5	0	0	0	0	0	0	0	0	0	0	0	0	4	3	2	0	0	0
Organismal Systems, Endocrine System, Renin-angiotensin system, K11141 - glutamyl aminopeptidase [EC:3.4.11.7]	1	1	1	0	1	0	0	0	0	0	0	1	0	0	0	0	0	0	0	0	0	0	1	1	1	0	1	2	0	1	1	0	1	2	0	0	1	0	0	0	0	0	1	1	1	0	1	0
Organismal Systems, Excretory System, Endocrine and other factor-regulated calcium reabsorption, K01325 - tissue kallikrein [EC:3.4.21.35]	0	0	0	0	0	0	0	1	0	1	1	1	0	0	0	0	0	0	1	1	1	0	0	0	0	0	0	0	0	0	1	2	1	0	1	0	1	0	1	1	0	1	1	1	1	0	0	0
Organismal Systems, Immune System, Complement and coagulation cascades, K01300 - carboxypeptidase B2 [EC:3.4.17.20]	1	0	1	0	1	1	1	1	0	1	1	2	0	0	1	0	0	0	2	2	1	1	1	1	1	1	0	1	1	0	1	0	1	1	2	2	1	0	1	1	0	1	2	0	0	0	0	1
Organismal Systems, Immune System, Complement and coagulation cascades, K03910 - alpha-2-macroglobulin	0	0	0	0	0	0	0	0	0	0	0	0	0	0	0	0	0	0	0	0	0	0	0	0	0	0	0	0	0	0	0	0	0	0	1	2	0	0	0	0	0	0	0	0	0	0	0	0
Organismal Systems, Immune System, Complement and coagulation cascades, K03984 - alpha-1-antitrypsin	43	25	32	9	31	33	14	10	21	32	32	19	20	14	32	17	42	31	35	30	42	28	20	20	17	10	12	30	32	31	45	23	29	4	23	14	19	12	24	12	22	44	16	25	26	3	4	2
Organismal Systems, Immune System, Hematopoietic cell lineage, K01389 - neprilysin [EC:3.4.24.11]	6	4	6	0	0	1	1	0	2	0	3	0	0	1	2	1	4	0	6	4	10	1	1	1	0	0	0	2	3	3	7	1	2	0	3	8	2	0	4	0	0	1	2	5	3	0	0	0
Organismal Systems, Immune System, Intestinal immune network for IgA production, K13073 - polymeric immunoglobulin receptor	9	6	5	7	6	8	2	1	5	6	7	8	5	6	5	1	2	3	11	11	11	8	7	20	7	6	8	5	17	11	20	4	13	13	11	6	18	2	7	5	0	1	11	16	8	7	13	4
Unclassified, K00783	0	0	0	0	0	0	0	0	1	1	1	0	1	0	0	0	0	0	0	0	0	0	0	0	0	0	0	0	0	0	0	0	0	0	0	0	0	0	0	0	0	0	0	0	0	0	0	0
Unclassified, K01128	4	5	4	3	4	3	2	4	3	3	3	3	2	3	2	3	3	2	6	4	9	4	3	3	3	2	3	5	3	3	8	1	4	3	2	3	4	3	3	2	2	4	5	3	3	2	1	1
Unclassified, K01175	1	0	0	0	0	0	0	0	0	0	0	0	0	0	0	0	0	0	0	0	0	0	0	0	0	0	0	0	0	1	1	0	0	0	0	0	0	0	0	0	0	1	0	1	0	0	0	0
Unclassified, K01262	12	3	7	7	3	7	1	0	3	1	1	3	1	5	4	5	8	0	6	1	4	2	0	0	2	2	2	4	11	8	1	0	0	2	1	4	6	6	5	3	0	0	0	0	0	5	4	2
Unclassified, K01271	1	2	2	2	0	0	1	0	1	0	1	1	1	0	1	0	1	1	2	1	1	1	1	1	1	1	1	1	1	1	1	1	1	2	5	3	1	1	1	1	1	1	1	1	0	0	0	0
Unclassified, K01273	3	0	0	1	2	2	1	1	1	1	2	2	1	2	1	2	2	0	5	2	4	2	2	1	1	1	1	2	2	2	6	2	4	1	3	2	1	1	1	1	1	1	4	4	7	2	1	2
Unclassified, K01301	9	9	7	4	7	4	4	8	8	7	6	6	9	3	8	6	10	11	14	9	12	7	11	8	6	7	8	7	9	7	6	6	7	4	11	10	6	10	10	1	9	6	6	9	4	0	0	0
Unclassified, K01310	1	1	1	0	0	0	0	0	1	0	0	0	0	0	0	0	0	0	0	0	0	0	1	0	0	0	0	1	0	0	0	1	1	0	0	0	0	0	1	0	0	0	0	0	0	0	0	0
Unclassified, K01311	5	3	5	3	5	4	2	3	3	3	3	2	1	2	3	0	2	0	3	2	4	3	6	4	3	2	3	3	4	3	6	5	7	1	5	5	3	4	6	2	2	3	4	3	4	3	3	3
Unclassified, K01316	8	3	2	1	4	5	3	2	5	1	2	1	0	2	1	3	2	5	3	2	4	0	0	1	2	1	1	1	2	1	2	0	0	2	1	0	2	1	2	2	3	5	0	0	0	0	0	0
Unclassified, K01372	0	0	0	0	0	0	0	0	0	0	0	0	0	0	1	0	0	0	1	0	1	0	0	0	0	0	0	0	0	0	0	0	0	0	0	0	0	0	0	0	0	1	0	0	0	0	0	0
Unclassified, K01436	0	1	1	0	1	0	0	0	1	1	0	1	0	0	0	0	1	0	1	0	0	1	1	2	0	0	1	1	2	3	1	0	2	0	0	1	0	2	0	0	0	3	0	0	1	0	0	0
Unclassified, K01447	0	0	0	0	0	1	0	0	0	0	0	0	0	0	0	0	0	0	0	0	0	0	0	0	0	0	0	0	0	0	0	0	0	0	0	0	0	0	0	0	0	0	0	0	0	0	0	0
Unclassified, K01481	0	0	0	0	0	0	0	0	0	0	0	0	0	1	0	0	0	0	0	0	0	0	0	0	0	0	0	0	0	0	0	0	0	0	0	0	0	0	0	0	0	0	0	0	0	0	0	0
Unclassified, K03321	1	0	0	0	0	0	0	0	0	0	0	0	0	0	1	0	0	0	0	0	0	0	0	0	0	0	0	0	1	0	1	0	1	0	1	0	1	0	0	0	0	1	1	0	0	1	1	0
Unclassified, K04525	3	0	0	0	1	0	0	0	0	0	1	0	0	0	1	1	5	0	2	1	3	0	0	0	0	0	0	1	1	1	1	0	0	0	0	0	0	0	0	0	0	4	1	0	0	0	0	0
Unclassified, K05230	0	0	0	0	0	0	0	0	0	0	0	0	0	0	0	0	0	0	0	0	0	0	0	0	0	0	0	0	0	0	1	0	1	0	0	0	0	0	0	0	0	0	0	0	0	0	0	0
Unclassified, K05738	0	0	0	0	0	0	0	0	0	0	0	0	0	0	0	0	0	0	0	0	0	0	0	0	0	0	0	0	0	0	0	0	1	0	0	0	0	0	0	0	0	0	0	0	0	0	0	0
Unclassified, K06499	14	12	14	10	14	18	5	7	4	13	11	13	12	12	12	3	11	2	18	16	20	16	16	19	10	13	12	12	12	10	12	8	14	8	20	11	17	9	8	11	8	12	18	13	8	9	8	10
Unclassified, K06553	0	0	0	0	0	0	0	0	0	0	0	0	0	0	0	0	0	0	1	0	0	0	0	0	0	0	0	0	0	0	0	0	0	0	0	0	0	0	0	0	0	0	0	0	0	0	0	0
Unclassified, K06554	1	1	0	0	1	0	0	0	0	5	6	4	0	0	1	0	3	1	7	7	9	1	1	3	0	2	0	4	5	3	4	0	4	0	0	0	2	0	0	0	0	1	2	1	1	0	1	0
Unclassified, K06811	3	3	1	1	1	0	0	1	2	0	2	1	1	1	1	0	0	0	0	1	2	0	0	0	1	0	1	2	2	2	4	1	1	0	1	0	2	0	1	0	0	0	4	5	4	0	0	0
Unclassified, K06813	9	9	8	5	9	9	6	7	8	7	5	8	7	2	8	9	7	11	8	6	4	10	9	7	8	5	6	7	7	11	9	12	8	3	9	7	8	11	14	7	12	9	6	7	9	3	0	0
Unclassified, K06889	0	0	0	0	0	0	0	0	0	0	0	0	1	0	0	0	0	0	0	0	0	0	0	0	0	0	0	0	0	0	0	0	0	0	0	0	0	0	0	0	0	0	0	0	0	0	0	0
Unclassified, K07604	48	39	28	53	44	21	33	16	35	41	39	38	25	35	25	24	25	19	17	32	29	32	16	22	31	31	34	20	11	18	36	23	20	39	16	26	43	15	21	33	11	32	10	29	18	20	23	21
Unclassified, K07605	55	49	47	82	59	25	46	28	46	58	42	47	36	54	23	26	40	21	20	37	34	35	24	32	38	45	52	25	18	31	39	24	30	57	32	38	60	18	28	49	21	42	14	30	29	29	35	23
Unclassified, K08468	0	0	0	0	0	0	0	0	0	0	0	0	0	0	0	0	0	0	0	0	0	0	0	0	0	0	0	0	0	0	0	0	0	0	0	0	0	0	0	0	0	0	0	0	0	0	1	0
Unclassified, K08848	0	0	1	1	3	2	0	0	0	0	0	0	0	0	0	0	0	0	0	0	1	0	1	0	0	0	0	0	0	0	0	0	0	0	0	0	0	0	0	0	0	0	0	0	0	0	0	0
Unclassified, K10384	4	2	0	3	2	0	1	0	1	2	3	0	0	2	1	1	0	1	0	1	0	3	1	1	0	1	2	1	0	1	3	1	1	1	0	0	4	1	1	2	0	3	0	3	1	3	0	0
Unclassified, K10387	0	0	0	1	0	0	0	0	0	0	0	0	0	1	0	0	0	0	0	0	0	0	0	0	0	0	0	0	0	0	0	0	0	0	0	0	0	0	0	0	0	0	0	0	0	0	0	0
Unclassified, K11267	0	0	0	0	1	0	0	0	0	0	0	0	0	0	0	0	0	0	0	0	0	0	1	0	0	0	0	0	0	0	0	0	0	0	0	0	0	0	0	0	0	0	0	0	0	0	0	0
Unclassified, K12019	0	0	0	0	0	0	0	0	0	0	0	0	0	0	0	0	0	0	0	0	0	0	1	0	0	0	0	0	0	0	0	0	0	0	0	0	0	0	0	0	0	0	0	0	0	0	0	0
Unclassified, K12310	0	0	0	0	0	0	0	0	0	0	0	0	0	0	0	0	0	0	2	0	1	0	0	0	0	0	0	0	0	0	0	0	0	0	0	0	0	0	0	0	0	0	0	0	0	0	0	0
Unclassified, K12557	0	0	0	0	0	0	0	0	0	0	0	0	0	0	0	0	0	0	0	0	0	0	0	0	0	0	0	0	0	0	0	0	1	0	0	0	0	0	0	0	0	0	0	0	0	0	0	0
Unclassified, K13023	0	0	0	0	0	0	0	0	0	0	0	0	0	0	0	0	0	0	0	0	0	0	0	0	0	0	0	0	0	0	1	0	0	0	0	0	0	0	0	0	0	0	0	0	0	0	0	0
Unclassified, K13213	0	0	0	0	0	0	0	0	0	0	0	0	0	0	0	0	0	0	1	0	0	0	0	0	0	0	0	0	0	0	0	0	0	0	0	0	0	0	0	0	0	0	0	0	0	0	0	0
Unclassified, K13907	0	0	0	0	0	0	0	0	0	0	0	1	0	1	0	0	0	0	0	0	0	0	0	0	0	0	0	0	0	0	0	0	0	0	0	0	0	0	0	0	0	0	0	0	0	0	0	0
Unclassified, K13948	0	0	0	0	0	0	0	1	0	0	0	0	0	0	0	0	0	0	0	0	0	0	0	0	0	0	0	0	0	0	0	0	0	0	0	0	0	0	0	0	0	0	0	0	0	0	0	0
Not assigned	131	89	79	70	104	80	37	41	48	99	82	92	55	69	68	65	92	59	167	151	177	83	66	132	43	75	55	93	136	94	209	44	111	68	94	48	123	21	56	85	57	90	93	118	85	45	56	29

## Sheet: %Eukaryota spectra
Sample	eukaryota/assigned
104-1	0.1992
104-2	0.150509
104-3	0.119926
106-1	0.173465
106-2	0.201299
106-3	0.14907
107-1	0.152514
107-2	0.104402
107-3	0.115759
112-1	0.130769
112-2	0.107742
112-3	0.108188
116-1	0.11695
116-2	0.165101
116-3	0.122188
119-1	0.152989
119-2	0.165251
119-3	0.115249
122-1	0.127697
122-2	0.15364
122-3	0.156308
124-1	0.128508
124-2	0.0964693
124-3	0.128448
127-1	0.107662
127-2	0.201018
127-3	0.121553
130-1	0.160601
130-2	0.132117
130-3	0.146931
135-1	0.245219
135-2	0.14613
135-3	0.202998
137-1	0.168328
137-2	0.152294
137-3	0.104712
147-1	0.179006
147-2	0.123161
147-3	0.152331
155-1	0.150237
155-2	0.0883333
155-3	0.148237
162-1	0.100196
162-2	0.105657
162-3	0.100669
163-1	0.0782484
163-2	0.0954274
163-3	0.0977183
